# Supplementary material for: Dietary switch reveals fast coordinated gene expression changes in Drosophila melanogaster
Source: Aging (Albany NY). 2014 May 14;6(5):355–68. doi: 10.18632/aging.100662 (PMC4069263; doi:10.18632/aging.100662)
Supplement: Supplementary file 3 [file aging-06-355-s003.xlsx]

## Sheet: mergedmicroarray-supplemental.c
psetid	Gene.Symbol	Category	CF02	CF04	CF06	CF08	CF12	CF18	CF24	CF32	CF40	CF48	CF56	CF72	RF02	RF04	RF06	RF08	RF12	RF18	RF24	RF32	RF40	RF48	RF56	RF72	SF02	SF04	SF06	SF08	SF12	SF18	SF24	SF32	SF40	SF48	SF56	SF72	RFvsCF.pvalue	RFvsCF.qvalue	RFvsCF.logfc	SFvsCF.pvalue	SFvsCF.qvalue	SFvsCF.logfc	SFvsCF.pvalue	SFvsCF.qvalue	SFvsCF.logfc
1622894_at	CG15120	1	7.12446	7.91185	7.82844	8.56263	7.51703	7.80208	7.59926	7.85113	7.70224	7.36129	7.78701	7.70369	6.98282	7.80368	7.51197	7.86164	7.30607	7.15767	6.90965	7.87331	7.04183	6.53297	7.04272	6.93919	7.48953	7.70833	7.37689	7.36617	7.66753	7.44631	7.16192	7.06182	6.76514	6.70069	7.16195	6.7115	0.000196619	0.00752478	-0.4823	0.00270743	0.0371704	-0.511114	0.799989	0.550971	-0.0288134
1623068_at	Cyp4e3	1	8.27484	8.75369	8.97273	9.4873	9.25239	10.027	8.86476	8.96161	9.95697	8.16206	8.6738	8.59256	8.16211	8.39823	8.04879	8.45268	7.89085	8.37408	8.15816	8.12749	7.75237	7.69457	7.48745	7.94869	8.1823	9.23415	8.40049	7.9804	8.60466	8.72078	8.46553	7.91636	7.75285	8.03478	7.98313	7.28483	0.000143458	0.00616735	-0.957024	0.00339241	0.0423339	-0.784957	0.215408	0.348819	0.172066
1623083_at	CG1698	1	8.53609	8.46083	7.95544	7.93475	8.35408	8.63982	8.48689	8.10455	8.15336	8.53472	8.05229	8.45914	9.10014	9.3455	9.47728	9.2545	9.19563	10.0412	9.53746	9.51602	9.27673	9.60486	9.23144	9.91658	8.69072	8.95612	8.82626	8.22328	8.57446	9.06566	9.10923	9.53403	9.64387	9.61588	9.50754	9.69184	2.73e-08	5.47e-05	1.15211	0.000175558	0.00704982	0.813911	0.0242665	0.135946	-0.338202
1623102_at	Gip	1	11.4315	11.7816	11.7988	11.8444	11.4918	11.4559	11.3411	11.5325	11.4767	11.3147	11.6038	11.2125	11.2246	11.3586	11.461	11.5833	11.2134	11.1925	11.0142	11.3258	11.2272	11.1372	11.3365	10.8316	11.3787	11.6409	11.4145	11.3206	11.3643	11.0475	10.8058	11.1296	10.9823	11.0072	11.0776	11.0418	3.98e-08	6.17e-05	-0.28164	3.34e-05	0.00258419	-0.339551	0.341712	0.399297	-0.057911
1623265_at	CG10513	1	10.4142	10.1813	10.1641	9.83697	9.76198	10.444	10.2131	9.8755	10.1916	9.9072	9.73943	9.93041	10.2827	10.1448	9.72582	9.47127	9.20024	9.61047	9.35932	9.18262	9.32045	9.70834	9.12839	8.91785	10.1418	9.81934	9.43819	9.94146	9.57658	9.51058	8.95491	8.88068	8.35937	8.80199	8.89276	8.7347	9.31e-05	0.00486451	-0.550614	0.00034479	0.0103151	-0.800609	0.0624734	0.219821	-0.249995
1623371_at	CG42249	1	6.8142	6.86124	6.582	6.62621	6.93519	6.77095	7.05453	6.84941	6.85692	6.98163	6.76261	6.67084	7.21987	7.17381	7.0458	7.25772	6.93342	7.24408	7.32655	6.95896	7.13157	7.12748	7.0383	6.73976	6.72435	6.85339	6.82958	6.76334	7.10704	7.25873	7.29464	7.20721	7.25282	7.19943	7.13201	7.31031	0.000246804	0.00864112	0.285969	0.000908336	0.0189904	0.263929	0.812038	0.554225	-0.0220402
1623373_at	CG14806	1	10.3932	10.3713	10.4449	10.4142	10.3916	10.4446	10.3549	10.2709	10.3795	10.4396	10.3149	10.3667	10.4346	10.4439	10.484	10.3932	10.5306	10.5971	10.5758	10.4306	10.5138	10.5516	10.4844	10.5073	10.386	10.4783	10.4499	10.6254	10.4618	10.5409	10.3879	10.4169	10.4304	10.5319	10.3635	10.599	0.000121078	0.00553089	0.113368	0.00154954	0.0264061	0.0904606	0.474035	0.44726	-0.022907
1623491_at	CG15155	1	9.59009	10.5072	10.7524	10.8137	10.27	10.562	9.80391	10.6636	10.4694	9.23025	10.3736	9.6338	9.56528	10.1449	10.0947	10.5691	9.88885	9.99927	9.67357	10.2202	9.83629	9.01258	9.8775	9.15386	9.76267	10.1574	9.82335	9.98545	10.3141	9.92785	9.10875	9.76393	9.76579	8.85435	9.7924	9.19924	3.26e-05	0.00256735	-0.386144	0.000325732	0.00996809	-0.517881	0.157893	0.319231	-0.131737
1623655_at	Yp2	1	14.8817	14.9289	14.9471	14.7822	14.854	14.7798	14.7325	14.8646	14.8314	14.7718	14.7755	14.617	14.7824	14.7903	14.6997	14.7479	14.5213	14.6597	14.6351	14.7137	14.6517	14.6253	14.5487	14.6264	14.7762	14.7742	14.6048	14.5416	14.7401	14.721	14.7319	14.6881	14.5299	14.5526	14.5546	14.5541	0.000189389	0.00736765	-0.147015	0.000162204	0.0066921	-0.166438	0.554984	0.474351	-0.0194232
1623706_at	CG9498	1	9.83756	10.648	10.8898	10.6068	10.5338	10.3694	10.437	10.8614	10.2314	10.2792	10.4929	10.4102	9.89428	10.9365	11.3335	11.049	10.872	10.5548	10.7039	11.0942	10.7725	10.7901	10.8717	10.9967	10.0434	11.2723	10.6821	10.4506	10.7188	10.9243	10.8936	11.081	11.0536	11.0396	10.9549	10.9155	8.12e-06	0.00106591	0.355978	0.0024811	0.0353905	0.369345	0.893907	0.576069	0.0133671
1623788_at	CG7461	1	12.1354	12.2826	12.2259	12.2355	12.0898	12.1167	12.0503	12.0816	12.0331	12.0688	12.0895	11.9695	12.0817	12.1731	12.0764	12.0884	12.0275	11.9402	11.9137	12.0765	11.8704	11.9632	12.0443	12.0224	12.0926	12.2208	12.028	12.0462	11.9502	12.067	11.9004	11.9971	11.8537	11.9212	11.9431	11.6849	0.000850162	0.0181046	-0.0917442	2.89e-05	0.00239851	-0.139457	0.162286	0.321638	-0.0477129
1623900_a_at	CG14935 /// DsecCG14935	1	9.63476	9.88529	9.85203	9.83727	9.81817	10.1375	9.44818	9.39849	9.04181	9.53916	9.15704	9.62762	10.1838	10.1861	10.1957	10.3343	9.91371	10.4278	9.88303	10.3034	10.0842	9.79121	9.63407	10.2511	10.0265	9.96947	10.0298	9.74469	9.90058	10.5061	10.4482	10.2727	10.312	10.2661	10.3895	10.1102	6.92e-05	0.00412481	0.484253	0.00175597	0.0284714	0.549876	0.561982	0.476559	0.0656222
1624340_at	Gs1l	1	10.2991	10.4083	10.5883	10.5215	10.3238	10.377	10.2523	10.3916	10.3733	10.0676	10.2812	10.264	9.99433	10.2686	10.2532	10.3818	10.0474	10.0795	10.064	10.073	10.0905	10.0292	10.0967	9.94468	10.2683	10.3698	10.0482	10.0001	10.1093	9.99351	9.99934	10.0042	9.77243	9.88931	10.0855	10.1817	3.19e-06	0.000691798	-0.235401	0.000411017	0.0115833	-0.285511	0.404007	0.422162	-0.0501104
1624342_at	CG10911	1	13.9032	13.8617	13.7423	13.7359	14.026	13.9292	14.0239	14.1014	13.7471	14.0649	13.952	14.1805	14.0044	14.1244	14.1795	14.068	14.0797	14.07	14.1759	14.1539	14.0496	14.2057	14.2007	14.2959	14.0145	14.0045	14.0904	13.8011	13.9622	14.018	14.1316	14.2283	14.1083	14.208	14.1956	14.2714	0.000158688	0.00662886	0.194965	0.00131389	0.0239204	0.147147	0.101069	0.272029	-0.0478184
1624410_at	CG15658 /// DmirCG15658	1	9.5665	9.70574	9.43566	9.56823	9.65254	9.81608	9.51461	9.76847	9.38656	9.43096	9.46484	9.4451	9.3518	9.43622	9.31062	9.37608	9.23741	9.43046	9.48022	9.28112	9.25948	9.35155	9.2699	9.42879	9.51618	9.37364	9.28431	9.2321	9.35651	9.4018	9.61237	9.63849	9.20651	9.19645	9.58057	9.25274	0.000524059	0.0132339	-0.211802	0.00378065	0.0454458	-0.1753	0.493706	0.452675	0.036502
1624474_at	CG4287	1	10.4796	10.4373	10.4382	10.528	10.3923	10.5014	10.3924	10.3227	10.4453	10.3634	10.374	10.4397	10.2927	10.4444	10.3625	10.4464	10.3461	10.3493	10.2598	10.4033	10.2798	10.3383	10.2278	10.336	10.4558	10.4504	10.3424	10.4425	10.2948	10.3792	10.3038	10.2339	10.2418	10.2097	10.1827	10.1353	0.00319533	0.0407739	-0.0856637	0.000449417	0.0121529	-0.120182	0.251249	0.365166	-0.0345183
1624521_a_at	CG17896	1	11.7667	11.8213	11.7723	11.6373	11.5616	11.5207	11.6731	11.7237	11.6115	11.6276	11.6648	11.5419	11.6482	11.6267	11.5208	11.4488	11.3413	11.2083	11.3579	11.3756	11.4186	11.5994	11.4606	11.3538	11.7624	11.6119	11.4145	11.3906	11.3908	11.4915	11.6107	11.507	11.2831	11.5359	11.5086	11.4536	4.08e-06	0.000788927	-0.213548	0.000404421	0.0114984	-0.163498	0.221008	0.35183	0.0500497
1624745_at	Ilp5	1	7.60778	8.29482	7.91206	8.00264	7.73034	8.08221	7.2248	7.49836	6.98257	7.00229	7.008	7.28752	6.29003	6.37356	6.66244	6.91365	5.97675	7.13464	6.7184	7.03314	6.18739	6.2483	6.33808	6.5025	7.55588	7.91671	6.92028	6.13089	7.74669	7.06236	6.60291	6.86645	6.75864	6.28135	6.04837	6.47132	1.04e-05	0.00125196	-1.02121	0.000718064	0.0162177	-0.689297	0.175417	0.328378	0.331913
1624756_at	CG5009	1	9.03484	9.57764	9.53105	9.60164	9.16776	9.52343	9.05084	9.32322	9.13942	8.80256	9.15542	9.18932	9.01254	9.13423	9.27602	9.59545	8.77018	9.17283	8.88776	9.30615	8.97163	8.6702	8.90745	9.01801	9.23649	9.2919	8.94326	8.88088	9.12335	9.09209	8.8615	8.99998	8.78097	8.53312	8.93872	8.83959	0.000678453	0.0156312	-0.19789	0.00116591	0.0222585	-0.297942	0.248495	0.363928	-0.100052
1624892_s_at	CG11892 /// DyakCG11892	1	10.855	11.1529	11.594	11.3941	11.141	11.3432	10.7947	11.2046	11.6161	10.601	11.3102	10.2955	10.7857	10.5797	10.7518	10.816	10.5631	10.5596	9.86426	10.4336	10.5324	10.2611	10.5551	9.1463	10.726	10.8017	9.93044	10.4428	11.0641	9.78567	8.91473	9.70651	9.15035	8.92188	9.68472	9.08818	6.15e-06	0.00095296	-0.704473	0.000108056	0.00520342	-1.2571	0.00851588	0.0746619	-0.552628
1624914_at	CG8690	1	10.4907	10.636	10.5886	11.2712	10.6651	11.3893	10.345	10.6848	11.2707	10.6504	11.0085	10.7136	10.1262	10.5148	10.3957	10.5431	9.95046	10.8499	9.6995	9.97938	10.8667	10.2687	10.1501	9.8286	10.6634	10.4134	10.5914	10.1535	9.74264	10.6497	9.85965	10.3353	10.8253	10.3607	10.6502	9.79768	1.18e-05	0.00134503	-0.545049	0.00143107	0.0251701	-0.472588	0.404619	0.422397	0.0724611
1625055_at	Ost48	1	10.2518	10.2163	10.3401	10.2838	10.2804	10.3123	10.41	10.425	10.4721	10.2857	10.4108	10.3053	10.0737	10.2277	10.1329	10.1734	10.2725	10.0688	10.0469	10.1114	10.3015	10.2752	10.2652	10.2563	10.2307	10.2213	10.2626	10.2539	10.1083	10.2845	10.1867	10.2768	10.1385	10.1124	10.309	10.1405	0.00138398	0.0245644	-0.149031	0.00133695	0.0241698	-0.122374	0.534678	0.466992	0.0266576
1625270_at	CG31259	1	6.20799	5.23606	6.75571	6.02385	6.12596	5.65034	6.48253	7.2715	5.68473	6.86259	7.09377	6.32855	6.93779	7.76008	7.88304	7.14101	7.41461	6.84179	7.65103	7.41421	6.74059	7.68836	7.90919	7.29186	6.12564	7.05233	6.45152	6.83273	7.14155	6.49032	7.17604	7.4574	6.44191	7.31167	7.74537	7.54093	2.87e-05	0.00239409	1.07917	0.00185485	0.0295368	0.670319	0.00726694	0.067555	-0.408846
1625369_at	CG10877	1	8.01384	7.88572	7.77291	7.94592	8.02319	8.09314	7.73111	8.13725	7.96673	7.68579	7.96246	7.66188	7.77926	7.78183	7.53716	7.48968	7.38273	7.20496	7.44024	7.38125	7.36088	7.46004	7.45845	7.12047	7.94067	7.67953	7.50544	7.63156	7.5138	7.46306	7.54309	7.51295	7.32416	7.30635	7.47835	7.24253	4.2e-05	0.00298409	-0.456916	1.73e-05	0.00166685	-0.394871	0.105577	0.276269	0.0620452
1625503_at	CG32425	1	11.7849	12.6729	12.7337	12.5069	12.1066	12.0536	12.2727	12.2841	12.0818	12.1811	12.2171	12.1497	11.6594	12.2837	12.4236	12.3935	11.6955	11.8074	12.1059	12.2721	11.9058	11.8832	12.1958	11.8731	11.7818	12.4972	12.1763	11.8607	12.1762	11.8956	11.905	11.9293	11.7621	11.942	12.0762	11.991	0.000163053	0.00670422	-0.212203	0.00142477	0.0251342	-0.254316	0.606626	0.490811	-0.0421124
1625652_s_at	CG12428	1	10.1782	10.3138	10.3705	10.42	10.2726	10.4714	10.1164	10.1351	10.1387	10.08	10.2702	10.1546	10.1307	10.1399	9.87047	10.0697	10.1137	9.94615	10.0369	10.2108	9.79562	9.77049	9.95621	9.94806	10.272	10.3614	10.1356	9.97538	10.0354	9.95267	10.0001	9.85646	9.82375	9.73187	9.90469	9.7038	0.000646581	0.0151539	-0.244389	0.000562395	0.0139171	-0.264029	0.706674	0.521846	-0.0196396
1625744_at	GstE6	1	12.1196	12.0714	12.2353	12.1696	12.1934	12.0192	12.2848	12.3903	12.3609	12.2161	12.3152	12.2494	11.9533	12.0457	11.9959	11.9623	12.0203	11.8241	12.1182	12.0138	12.0261	12.088	12.0772	12.0102	12.0718	12.058	12.007	12.0583	12.066	11.984	11.9665	12.0518	12.0449	12.1362	12.2312	12.2549	7.63e-06	0.00106591	-0.207499	0.00254002	0.0357838	-0.141209	0.0416621	0.181148	0.0662901
1625840_at	CG12001	1	8.81372	9.16308	9.22499	9.56013	9.07929	9.28998	8.75751	8.85705	8.7637	8.47999	8.89799	8.89225	8.65568	8.89821	8.78153	8.88432	8.57537	8.70653	8.34694	8.8121	8.14114	8.1474	8.43713	8.60433	8.94471	9.28025	8.54182	8.58531	9.00241	8.42896	8.59466	8.5144	8.41397	8.11494	8.51043	7.84854	1.56e-05	0.0015474	-0.399083	0.00404962	0.0474691	-0.416607	0.869538	0.569235	-0.0175241
1625857_at	CG8451	1	10.4078	10.3818	10.2818	10.3921	10.1399	10.2469	10.2223	10.3716	10.1224	10.2133	10.3288	10.2807	10.2726	10.0984	9.96477	9.87985	9.98337	9.78705	9.99419	9.90648	9.66206	9.87297	9.86302	9.69475	10.4513	10.2568	9.96297	10.0801	9.89563	9.80497	9.85787	9.8826	9.64418	9.86804	9.77939	9.4201	2.79e-06	0.000667829	-0.367488	0.000127852	0.00569493	-0.37379	0.87631	0.571618	-0.00630245
1625934_at	p	1	8.91354	9.06756	8.9784	9.11042	8.87245	8.96961	8.80911	8.9805	8.80661	8.79684	8.82951	8.82458	8.81296	8.89457	8.87716	8.96563	8.84215	8.71472	8.65408	8.93813	8.72998	8.69747	8.72169	8.79178	8.87786	8.96603	8.8422	8.94169	8.89457	8.68185	8.73949	8.77862	8.6403	8.72008	8.87267	8.51428	0.000109806	0.00524047	-0.109901	0.00251462	0.0355898	-0.124125	0.684721	0.515031	-0.0142241
1626198_at	Cyp4d8	1	7.99958	8.64102	8.26875	8.56521	8.05449	8.46027	8.04175	8.22931	8.18481	7.8021	8.12715	7.99598	7.98786	7.87063	7.87444	8.40653	7.7308	8.171	7.59772	8.26226	7.62309	7.38762	7.67094	7.69256	8.37172	8.26422	7.68444	7.68851	8.22404	7.82673	7.31349	7.75126	7.71223	7.28462	7.54358	7.45003	0.000259795	0.00889004	-0.341247	0.0013858	0.0245644	-0.437963	0.389591	0.417126	-0.0967153
1626442_at	CG7224	1	10.927	10.8469	10.4266	10.8166	10.807	11.2211	10.6474	10.3327	10.6358	10.7814	10.3635	10.6663	11.3935	10.8505	10.8816	10.9967	10.8453	11.8473	11.3189	11.2582	11.5004	10.911	10.8389	11.085	11.1749	11.2244	11.0746	10.9371	11.4171	11.6705	11.1586	11.0786	11.5916	11.3134	11.0228	11.2684	0.000418162	0.0116617	0.437917	4.26e-06	0.000795137	0.538314	0.213006	0.347685	0.100397
1626585_s_at	CG4589	1	9.96372	9.95172	9.98296	9.97816	9.91215	9.97116	9.72435	9.89249	9.82894	9.77776	9.98951	9.82937	9.87679	9.78296	9.75567	9.63383	9.64765	9.82239	9.56706	9.74867	9.73137	9.7088	9.69434	9.66301	9.94694	9.863	9.75164	9.64122	9.73776	9.84019	9.74674	9.61905	9.77848	9.70203	9.66299	9.70533	1.5e-05	0.00153569	-0.180813	0.0011046	0.0215748	-0.150578	0.193777	0.338355	0.0302346
1626664_at	CG3285	1	8.58289	9.38623	9.47504	9.27502	8.81344	8.84181	8.59208	8.77736	8.91103	8.33106	8.73356	8.24955	8.73363	9.28151	9.1137	9.04336	8.33497	8.03314	8.09856	8.45358	8.20808	8.22116	8.65024	7.89427	8.76028	9.31429	8.39825	8.22082	8.46194	7.88212	8.06399	8.2432	7.58102	7.69545	8.41123	7.77296	0.00167637	0.0276558	-0.325239	0.000666993	0.0155008	-0.596958	0.0135272	0.09833	-0.27172
1627088_at	fit	1	13.6689	14.0774	14.1946	14.1917	14.164	13.9059	13.8623	14.1958	13.881	13.7591	13.9148	13.6124	12.6461	13.6143	13.5946	13.8238	13.0803	13.3045	13.1967	13.9619	12.796	12.3972	13.3025	13.2891	13.9313	13.8351	13.6538	13.0137	14.2428	13.4338	13.3288	13.6257	13.424	12.7711	13.0575	13.0978	2.82e-05	0.00238352	-0.701746	0.0013233	0.0240472	-0.501046	0.273742	0.372934	0.200699
1627352_at	Oat	1	10.6722	10.8222	10.5853	10.3974	10.4989	10.4063	10.6177	10.6703	10.922	10.4413	10.7414	10.3785	10.1407	10.5177	10.1513	10.2707	10.1207	10.0305	10.0824	10.0854	10.2889	10.2953	10.156	9.86761	10.691	10.299	10.1403	10.1025	10.4043	10.3414	9.92584	10.1637	9.88381	10.1941	10.1153	9.98675	2.52e-06	0.000631994	-0.428848	0.000621273	0.014803	-0.408793	0.798009	0.550458	0.0200558
1627354_at	CG11779 /// CG5835 /// DanaCG11779 /// DbipCG11779 /// DmeiCG11779 /// DmmmCG11779 /// DmplCG11779 /// DninCG11779 /// DpbpCG11779 /// DpbpCG5835 /// DpspCG11779 /// DvarCG11779	1	9.66692	9.96389	9.70736	10.0852	9.85989	9.96732	10.0695	10.1004	9.78148	9.89091	9.92057	10.0994	9.67385	9.53356	9.72054	9.83676	9.40249	9.71725	10.0723	9.74243	9.6193	9.88263	9.81976	9.92451	9.87366	9.68018	9.52602	9.45808	9.7708	9.81472	9.74658	9.81122	9.6716	9.63018	9.72024	9.58667	0.00379702	0.0455292	-0.180628	0.00260466	0.0363193	-0.235243	0.453935	0.439452	-0.0546149
1627658_s_at	CG4995	1	7.16316	7.19491	7.19892	7.06302	6.96108	7.04051	7.25389	6.94431	6.89986	7.48003	6.9345	7.02235	7.56879	7.47736	7.43941	7.65297	7.99874	7.39114	7.85761	7.51849	7.45155	7.98376	7.49953	7.76243	7.45815	7.23603	7.18899	7.71173	7.09479	7.35408	7.2091	7.49911	7.43093	7.51308	7.20487	7.53446	3.04e-06	0.000683838	0.537103	0.00261176	0.0363549	0.273231	0.00855594	0.0748238	-0.263872
1627861_s_at	Aldh-III	1	10.0014	10.2528	10.378	10.3476	9.91482	10.1412	9.79671	10.0906	10.0714	9.72586	9.91797	9.79248	9.66991	9.99666	10.1487	10.2163	9.77652	9.92283	9.63968	10.0034	9.79949	9.72609	9.74463	9.78991	9.89304	10.2641	9.60064	9.37905	9.9416	9.81932	9.6742	9.69386	9.50474	9.51848	9.83757	9.28233	0.00015802	0.00662886	-0.166401	0.00382953	0.0457249	-0.335167	0.118607	0.288389	-0.168765
1627910_s_at	CG8036	1	11.7956	11.9629	12.0786	11.9103	11.5955	11.5616	11.612	11.7812	11.783	11.4475	11.9148	11.351	11.6063	11.7386	11.5996	11.725	11.5489	11.3865	11.2366	11.5182	11.4708	11.5212	11.5577	11.2851	11.5859	11.7167	11.6446	11.6634	11.4086	11.3765	11.2678	11.4433	11.2809	11.5042	11.5175	11.2727	0.000519537	0.0131404	-0.216635	0.000127556	0.00569493	-0.25933	0.0493461	0.196985	-0.042695
1628100_at	CG42235	1	7.80402	7.85481	8.28753	8.14839	7.82981	7.89269	7.56918	7.9345	7.92352	7.42409	7.96921	7.35347	7.5766	7.94219	7.82921	8.09441	7.56232	7.37314	7.1036	7.69747	7.54274	7.2289	7.47555	7.28335	7.54509	7.71683	6.90956	7.26847	7.56691	7.01497	7.2703	7.44541	6.84845	6.80346	7.38849	6.83423	0.00051684	0.0131136	-0.273479	0.00013865	0.00600897	-0.614922	0.00517266	0.0551138	-0.341443
1628271_at	CG3609	1	10.9297	11.1595	11.4895	11.2528	11.0109	10.9622	10.8049	11.1319	11.1551	10.6097	11.0063	10.8383	10.3329	10.7389	10.8149	11.0148	10.3799	10.4722	10.3355	10.5992	10.6905	10.307	10.5791	10.2574	10.6607	11.06	10.494	10.3117	10.5552	10.4786	10.2882	10.5022	10.4265	10.4462	10.6182	10.5893	5e-08	6.17e-05	-0.485727	9.88e-05	0.00498779	-0.493345	0.933474	0.586343	-0.00761889
1628284_at	CG3690	1	7.71785	7.91282	7.95858	7.60811	7.54251	7.80586	7.79343	7.74765	7.7042	7.72219	7.86859	7.42904	7.57513	7.57809	7.32625	7.6883	7.20052	7.39364	7.30525	7.1885	6.87268	7.44608	7.15948	7.15724	7.51033	7.89031	7.33587	7.38434	7.33676	7.15733	7.45549	7.21302	6.67019	7.18232	7.52107	6.94352	0.000157045	0.00662886	-0.409972	0.000165198	0.00677502	-0.434192	0.719839	0.525925	-0.0242199
1628432_at	CG5590	1	10.9464	11.0702	10.9197	10.9813	11.0253	10.9503	10.8512	11.0334	10.9822	10.8423	10.9959	10.9671	10.779	10.9523	10.8369	10.7872	10.8609	10.694	10.5981	10.8077	10.903	10.8422	10.8544	10.7588	10.9072	11.0139	10.9004	10.8294	10.7822	10.8658	10.6602	10.723	10.7721	10.718	10.7452	10.5094	2.13e-05	0.00198177	-0.157567	0.00050816	0.0130091	-0.178208	0.581507	0.482824	-0.0206404
1628494_a_at	Picot	1	10.3265	10.8209	10.9879	10.7049	10.6905	10.5908	10.9457	10.8086	10.3559	10.9739	10.943	10.9246	10.631	11.365	11.3671	11.092	11.3541	11.1943	11.3728	11.3052	11.0476	11.3847	11.3426	11.2765	10.3527	11.4638	11.3131	11.0839	10.7986	11.2246	11.3323	11.2449	11.2095	11.6362	11.3034	11.3705	5.66e-08	6.48e-05	0.471657	4.64e-05	0.00316576	0.438374	0.596318	0.487871	-0.0332835
1628657_at	GstE9	1	12.7764	13.0111	13.0732	13.1206	12.7403	12.7361	12.8877	12.8942	12.6695	12.7222	12.7799	12.9155	12.5292	12.8555	12.657	12.9729	12.3369	12.3949	12.5704	13.048	12.2579	12.538	12.4961	12.6852	13.0312	12.8949	12.6981	12.396	12.5516	12.1314	12.4733	12.4569	12.1308	12.2084	12.2327	12.645	0.000211704	0.00780412	-0.248723	0.000472554	0.0125059	-0.37302	0.195347	0.338904	-0.124297
1628699_at	Lsp1beta	1	9.17656	10.3924	10.6043	11.3534	10.4875	9.69006	9.22467	10.7394	10.6271	9.39438	10.7688	9.05531	7.86164	8.50574	8.71232	9.68827	8.74467	9.79321	8.92451	9.72197	8.47431	8.18197	8.82535	7.60287	9.60928	10.6473	8.71642	8.1456	9.36987	9.20997	8.01821	8.98575	9.20939	8.49312	9.16841	8.57562	2.48e-05	0.00215678	-1.37308	0.00253879	0.0357838	-1.11374	0.426296	0.430308	0.25934
1628826_at	CG34288	1	7.84121	8.14528	8.03113	8.12803	8.27648	8.41326	8.591	8.38215	8.2061	8.30755	7.95404	8.63935	8.41514	8.53698	8.71822	8.86906	8.80537	8.99918	9.18825	8.76837	8.87599	8.97605	8.80681	9.34268	8.26828	8.22724	8.38618	8.03093	8.47937	8.77755	8.73697	8.90123	8.89393	8.70989	8.87891	9.15655	7.2e-09	3.45e-05	0.615544	0.000604244	0.0145268	0.377623	0.00875229	0.0755643	-0.237922
1628873_s_at	Mio	1	10.5563	10.6549	10.445	10.4847	10.4531	10.4622	10.4759	10.4234	10.6158	10.5087	10.5522	10.4231	10.5037	10.5395	10.1955	10.3973	10.4556	10.2217	10.2868	10.3629	10.3395	10.4095	10.3798	10.399	10.5217	10.2776	10.3629	10.3365	10.3509	10.3242	10.4213	10.4514	10.349	10.2607	10.5273	10.1845	0.000518786	0.0131404	-0.130389	0.00189438	0.0296654	-0.140597	0.813993	0.554792	-0.0102083
1628930_at	swi2	1	6.49146	6.36363	6.35324	7.34141	7.00023	7.0687	6.99835	7.01357	6.86098	7.43655	7.03652	6.84456	6.52371	7.11173	8.06208	7.62646	7.93377	7.81695	7.70398	7.93915	7.44108	7.30911	7.66104	7.67399	6.42608	7.52512	7.40809	7.62477	7.57045	7.41788	7.26247	7.63066	7.80956	7.2874	7.25029	7.26929	0.000482223	0.0127183	0.666156	0.0023535	0.0341844	0.472738	0.0683275	0.229699	-0.193418
1629095_a_at	Men	1	12.7855	13.0601	12.9847	13.0248	12.8016	12.6565	12.4095	12.9736	12.7165	12.2988	12.7505	12.4468	12.4724	12.9129	12.5805	12.5625	12.2684	12.1262	12.0352	12.5023	11.9182	11.6453	12.3079	11.6734	12.5905	12.8174	12.3026	12.2169	12.2188	12.0464	12.2485	12.2641	11.745	11.8741	12.1545	11.6775	1.71e-06	0.000498756	-0.491981	1.09e-05	0.00128182	-0.562704	0.212326	0.347431	-0.070723
1629106_at	CG2233	1	14.5943	14.669	14.6007	14.6976	14.551	14.6222	14.5705	14.629	14.5833	14.4793	14.4915	14.6046	14.5039	14.5838	14.5672	14.6875	14.3726	14.5244	14.3813	14.6614	14.5182	14.3253	14.3912	14.6301	14.6693	14.6119	14.4968	14.4353	14.6055	14.4829	14.4683	14.5298	14.4836	14.3348	14.4087	14.4585	0.00332032	0.0417265	-0.0788527	0.00434794	0.0498367	-0.0922987	0.740239	0.532198	-0.013446
1629153_s_at	CG5991	1	10.7175	11.2825	11.332	10.9642	10.8868	10.9896	10.6191	11.0005	10.7675	10.7128	10.8138	10.5276	10.2862	10.8061	10.909	11.0078	10.5369	10.8663	10.3754	10.937	10.7758	10.3849	10.5271	10.322	10.587	10.953	10.7675	10.5787	10.9472	10.91	10.6192	10.8672	10.5898	10.2523	10.6901	10.1708	0.000594195	0.0143497	-0.239935	0.00201763	0.0306381	-0.223421	0.818161	0.55591	0.0165139
1629215_at	Kua	1	5.50582	5.73287	5.46346	5.75272	5.72692	5.82869	5.41453	5.70211	5.58713	5.32656	5.55963	5.49185	6.09726	6.2529	6.33577	6.07986	5.91782	6.18008	5.64615	6.22343	6.20077	5.87312	5.78107	5.74532	5.78002	5.97454	5.78467	6.03499	5.86097	6.29913	6.10097	6.16092	6.07509	5.7739	5.94579	5.51313	1.55e-05	0.0015474	0.43677	2.78e-05	0.00235669	0.350985	0.273254	0.37267	-0.0857851
1629431_at	CG18747	1	7.6083	7.58949	7.37211	7.60523	7.65287	7.90724	7.89773	7.8086	7.55077	7.75228	7.68001	7.86951	7.89195	7.98435	7.87259	8.06708	7.70956	8.01526	8.22377	7.85477	8.18872	8.19851	8.19511	8.17676	7.62284	7.79827	7.75166	7.55629	7.74792	8.01141	7.83903	8.19625	7.86789	7.86691	8.08366	8.27409	6.82e-05	0.00408013	0.340359	0.00331065	0.0416376	0.193507	0.0561218	0.210594	-0.146852
1629476_at	CG7542	1	11.1642	11.0252	10.7827	10.3315	11.2756	11.3548	11.1233	11.2123	11.8927	11.9203	11.5136	11.1034	11.9562	11.9361	11.7763	11.4076	12.3488	12.268	12.188	11.6827	12.3862	12.2026	12.1547	11.7322	11.3025	10.7128	11.5739	11.7188	11.5968	12.4314	11.829	11.9391	12.5182	12.1932	12.1389	12.1473	7.55e-07	0.000281727	0.778317	0.000720099	0.0162407	0.616868	0.285128	0.378307	-0.161449
1629511_at	CG5326	1	9.66004	9.74526	9.6271	10.03	9.5411	9.33833	9.50335	9.52268	9.629	9.40571	9.60347	9.6524	8.88084	9.4285	9.2891	9.33531	9.1709	8.80049	9.01185	9.07224	9.13623	9.32205	9.32221	8.98438	9.27917	9.49472	9.09964	9.21862	9.40369	9.3671	9.29627	9.07551	8.88078	9.26336	8.95344	9.11886	5.95e-06	0.00095296	-0.458696	0.000272312	0.00905947	-0.400606	0.484486	0.450575	0.05809
1629578_at	Tango7	1	12.1957	12.1837	12.1457	12.0137	12.0863	12.0598	12.1731	12.0372	12.1315	12.1544	12.064	12.0264	12.2812	12.2734	12.184	12.1053	12.1894	12.1772	12.1953	12.1232	12.2334	12.2662	12.0919	12.2392	12.191	12.1214	12.1206	12.1214	12.1715	12.3722	12.3393	12.2243	12.2752	12.3722	12.2982	12.2673	6.27e-05	0.00379241	0.0906687	0.0022462	0.0330449	0.13358	0.212974	0.347685	0.0429115
1629718_at	CG16727	1	8.11957	8.25376	8.71015	8.60358	8.2542	8.54216	7.86197	8.56384	8.39111	7.68826	8.16626	7.77042	8.0753	8.40593	8.19592	8.62539	8.05586	7.78111	7.55836	8.14491	7.97341	7.44493	7.71015	7.23777	7.92059	7.94456	7.45359	7.85135	8.08646	7.83552	7.28002	7.38622	7.60362	7.07288	7.98462	7.37394	0.0017409	0.028367	-0.309686	0.00015874	0.00662886	-0.594325	0.0197731	0.121484	-0.284639
1629853_at	CG3699	1	10.7803	11.8543	11.8687	11.7028	11.1769	11.3227	10.5524	11.3777	11.3067	10.4439	11.4207	10.6509	10.3729	10.9416	10.9422	11.2548	10.2603	10.9605	10.2116	10.9974	10.8634	10.2575	10.6884	10.1543	10.5999	11.4161	10.8405	10.3925	10.8591	10.6828	10.2925	10.6729	10.638	10.397	10.6081	10.3542	1.42e-05	0.00149479	-0.546086	0.000295873	0.00950797	-0.558672	0.913511	0.581687	-0.0125858
1629955_at	CG13309	1	10.8071	10.5441	10.5401	10.8829	11.041	11.8755	11.4477	10.8885	11.3744	11.3829	10.4059	11.2167	11.3958	10.8549	11.3429	11.2876	11.549	12.3318	12.0991	11.6376	11.9265	11.6476	10.7753	11.722	10.9745	10.8617	10.7548	10.9737	11.3401	12.2384	11.6831	11.4175	12.0797	11.8051	11.3869	12.1506	3.75e-07	0.000188126	0.513627	0.000303606	0.00968665	0.438285	0.484803	0.450594	-0.0753413
1630679_at	CG42249	1	10.3053	10.264	9.94606	9.93468	10.387	10.2496	10.4013	10.3161	10.3067	10.6324	10.2238	10.2755	10.5493	10.6784	10.5717	10.533	10.347	10.6053	10.8288	10.5108	10.6238	10.681	10.5953	10.4004	10.3599	10.3381	10.2256	10.249	10.5106	10.7289	10.6906	10.69	10.716	10.7438	10.6171	10.6297	0.000285092	0.00931081	0.306868	4.42e-05	0.00308717	0.271401	0.574451	0.480447	-0.0354669
1630855_s_at	Ste12DOR /// Ste:CG33236 /// Ste:CG33237 /// Ste:CG33238 /// Ste:CG33239 /// Ste:CG33240 /// Ste:CG33241 /// Ste:CG33242 /// Ste:CG33243 /// Ste:CG33244 /// Ste:CG33245 /// Ste:CG33246 /// Ste:CG33247	1	8.39572	9.05426	8.90644	8.81616	8.99258	8.59018	8.31973	8.59839	8.5671	8.38448	8.28877	7.8678	8.22464	8.51594	7.30334	8.1989	6.88202	8.37386	7.94706	7.99155	7.66965	8.19016	7.70472	7.44685	8.24298	8.58676	7.90579	7.3134	8.74835	8.52173	7.54031	7.90586	8.53546	7.3726	7.43497	7.68481	0.00186967	0.0296256	-0.69441	0.00116295	0.0222585	-0.582382	0.616211	0.494187	0.112028
1631205_a_at	CG6084	1	12.99	12.9955	13.0158	12.7176	12.6649	12.5379	12.7065	12.9883	12.839	12.573	12.8346	12.7508	12.4484	12.6822	12.485	12.6066	12.4583	12.1354	12.2928	12.3842	12.312	12.489	12.4818	12.2051	12.5291	12.6229	12.4925	12.5803	12.3644	12.2881	12.3824	12.4272	12.0756	12.4423	12.4989	12.5904	1.12e-05	0.00130984	-0.3861	4.19e-05	0.00298409	-0.359969	0.561551	0.476533	0.0261304
1631387_at	CG30344	1	9.64945	9.59395	9.60473	9.779	9.64507	9.73466	9.64076	9.70077	9.57923	9.39191	9.56221	9.56966	9.36985	9.52001	9.42866	9.76411	9.53775	9.54898	9.39	9.69626	9.45395	9.28154	9.33881	9.49829	9.57635	9.53631	9.44377	9.53255	9.71225	9.54528	9.58521	9.52378	9.34537	9.16078	9.36353	9.24076	0.000265672	0.00893121	-0.135266	0.00039355	0.0113231	-0.157122	0.645936	0.503472	-0.0218554
1631419_at	Yp3	1	14.8574	14.9561	14.9337	14.8451	14.9087	14.8804	14.7984	14.918	14.8836	14.8017	14.7734	14.7679	14.7218	14.8003	14.8097	14.8345	14.6809	14.7872	14.6976	14.7694	14.7733	14.7035	14.671	14.6662	14.8012	14.9014	14.7252	14.741	14.8623	14.8744	14.799	14.7208	14.7558	14.7148	14.7016	14.6928	6.24e-06	0.00095296	-0.117415	0.000818439	0.0176875	-0.0861661	0.219268	0.350871	0.0312487
1631439_at	Odc2	1	6.25314	6.14642	6.29333	6.44217	5.86722	6.34256	5.90868	6.33069	6.28736	5.98202	5.88727	5.8038	5.88962	5.76127	5.61035	5.79483	5.63529	5.62258	5.8476	5.7225	5.621	5.64375	5.88114	5.95883	5.85802	5.55524	5.59644	5.59227	6.1077	5.63007	6.08275	5.69543	5.08167	5.40732	5.91783	5.47379	0.000993046	0.02005	-0.379659	0.00341365	0.0425328	-0.462175	0.330098	0.395258	-0.0825168
1631588_at	Pgd	1	10.8982	11.1601	11.389	11.0348	10.8008	10.7517	10.7215	11.1602	10.9572	10.544	11.1168	10.733	10.6958	11.116	10.9815	10.9605	10.7538	10.4849	10.3364	10.7928	10.8008	10.5633	10.8282	10.4899	10.7394	11.0265	10.803	10.929	10.5202	10.5803	10.5173	10.8075	10.5545	10.6786	10.827	10.6262	0.000479689	0.0126723	-0.205293	0.00137104	0.024557	-0.221485	0.704705	0.521439	-0.0161919
1631637_a_at	Cpr	1	12.4878	12.5846	12.6405	12.5638	12.3446	12.3627	12.5144	12.5249	12.4678	12.5667	12.6005	12.4779	12.6641	12.7465	12.7759	12.5735	12.7191	12.4927	12.5952	12.6619	12.5086	12.6382	12.6791	12.5506	12.6293	12.741	12.6152	12.5676	12.4297	12.5874	12.5731	12.6294	12.6363	12.6678	12.5294	12.5947	0.000862417	0.0183412	0.122416	0.00416785	0.0484188	0.0887114	0.337861	0.39863	-0.0337043
1631763_at	CG31793	1	8.67268	9.05691	8.94637	8.922	8.74263	8.88661	8.8468	8.72141	8.80857	8.81186	8.7267	8.77343	8.71703	8.75424	8.80233	8.79466	8.44562	8.69539	8.6414	8.70481	8.42333	8.68804	8.56809	8.73532	8.83918	8.77984	8.61898	8.642	8.62738	8.42764	8.57634	8.66688	8.40922	8.47347	8.7254	8.24327	0.00092632	0.0191912	-0.162142	0.00171419	0.0279951	-0.240532	0.193212	0.33819	-0.0783891
1631801_at	CG15044	1	8.35806	8.5867	7.81152	8.10436	8.63781	8.49979	8.2389	8.70395	8.14714	8.34488	8.18768	8.63104	8.49418	8.87045	8.69915	8.556	8.84619	8.89534	9.05822	8.73007	8.46026	8.32015	8.59172	8.67482	8.61226	8.60519	8.58085	8.45204	8.68836	8.67938	8.91541	8.88817	8.8987	8.47462	8.60238	8.84329	0.00240667	0.034519	0.328726	0.00118918	0.0225404	0.332402	0.952015	0.590683	0.00367534
1631969_at	CG15221	1	6.00942	5.2194	5.70678	5.56266	5.71216	5.86158	6.08751	6.02224	6.03959	6.1695	6.12061	6.0354	5.66351	6.26311	6.43415	6.27842	6.56971	6.24611	6.22973	6.64703	6.46539	6.33278	6.41191	6.20463	5.93636	5.87409	5.99647	6.44315	5.83772	6.32991	5.95237	6.43194	6.64129	6.48114	6.66484	6.30391	0.00239203	0.0344631	0.433303	0.00141138	0.0249541	0.362195	0.467167	0.444348	-0.0711079
1632028_a_at	Gs1l	1	9.91607	9.97659	10.201	10.0029	9.84599	9.91428	9.72623	10.0443	9.99434	9.48439	9.71856	9.71636	9.50235	9.83982	9.578	9.89508	9.50314	9.44218	9.46456	9.44908	9.63274	9.5148	9.53377	9.33145	9.81755	9.86703	9.52968	9.5459	9.56618	9.63944	9.39927	9.56646	9.32868	9.36631	9.70329	9.77994	0.000152421	0.00650701	-0.321167	0.00184106	0.0293463	-0.285935	0.615897	0.494178	0.0352316
1632076_a_at	CG6933	1	5.6302	5.686	6.21141	5.62966	6.08393	5.58379	6.44344	6.16987	6.08441	5.86546	5.99024	6.66909	6.85747	7.45702	6.93555	7.26916	6.69397	6.88414	7.56637	6.9583	6.44433	6.8169	6.65601	6.77024	6.53551	5.7819	6.49335	6.59178	6.14345	6.99456	6.83506	7.51013	7.35061	7.06528	7.06581	6.9436	4.2e-05	0.00298409	0.938497	0.000291341	0.009438	0.771961	0.430544	0.431527	-0.166536
1632710_s_at	CG4572 /// DpseGA18267	1	11.1492	11.1061	11.0949	11.3078	11.1575	11.451	11.2558	11.12	11.3293	11.0676	11.1538	11.2548	11.0254	11.1086	10.976	11.0563	11.099	11.2188	10.9179	10.9797	11.0817	11.0436	10.908	11.1651	11.119	11.0986	11.0932	10.9937	11.0939	11.1283	10.9809	11.028	10.9324	11.0403	11.0158	10.7697	0.000351649	0.0104424	-0.155635	0.00376988	0.0453503	-0.179499	0.574445	0.480447	-0.023864
1632717_a_at	CG14341	1	8.84431	8.64395	8.71661	8.9557	8.76499	9.05516	9.02352	8.88327	8.89217	8.88723	8.8138	9.18302	8.92364	8.84964	8.99743	8.93238	9.08583	9.07456	9.09027	8.91972	9.07822	9.02434	8.88975	9.59683	8.88188	8.92238	9.00223	9.1017	8.93485	9.12972	8.97757	8.98027	9.02282	8.86883	8.9454	9.32391	0.00259912	0.0362735	0.149907	0.0018305	0.0292652	0.118986	0.409008	0.423989	-0.030921
1632782_a_at	CG7675	1	8.98743	9.34931	9.69091	9.56688	9.16982	9.28956	9.48036	9.29555	9.09386	8.69337	8.77791	9.50526	8.91976	8.76483	8.87686	8.90984	8.50897	8.74688	8.50947	8.61963	8.64807	8.70742	8.77614	8.88618	8.99988	9.30016	8.56998	8.80985	8.86586	8.80666	8.77813	8.52947	8.37295	8.35775	8.66443	8.73623	0.000205695	0.00769136	-0.502181	0.000398115	0.0114	-0.509073	0.932739	0.586271	-0.00689157
1632952_at	CG4598	1	10.9852	10.9735	10.8362	10.9405	10.895	10.8766	10.7771	10.7759	10.9974	10.7586	10.7553	10.8515	10.6954	10.8189	10.6365	10.7507	10.8244	10.7507	10.7161	10.7615	10.7131	10.7798	10.6824	10.6613	10.7777	10.8663	10.7543	10.8287	10.7249	10.7168	10.5451	10.7293	10.6548	10.6791	10.6137	10.7737	0.000624668	0.0148618	-0.136019	7.83e-05	0.00437481	-0.146537	0.709495	0.522822	-0.0105173
1632980_at	CG3902	1	12.1616	12.2497	12.488	12.2424	12.1577	12.0652	11.961	12.2793	12.1349	11.8679	12.0432	11.9463	11.8079	11.7551	11.8214	11.9613	11.5418	11.6825	11.5808	11.8306	11.7398	11.6667	11.6888	11.3852	12.0641	12.0549	11.6284	11.6264	11.9686	11.9322	11.6929	11.7861	11.5799	11.755	11.7531	11.6147	3.16e-07	0.00017486	-0.427948	0.000381722	0.011089	-0.345057	0.233951	0.357876	0.0828907
1633197_at	CG32024	1	7.72348	7.4046	7.88166	8.00864	8.33543	8.90307	8.47753	8.25142	7.96834	8.4861	7.60351	8.1868	8.19425	7.65572	8.49693	8.78531	8.68041	9.0477	8.8692	8.75897	8.81995	8.37748	8.17791	8.79847	8.08995	8.1819	7.96356	8.23717	8.60747	9.02586	8.49038	8.66339	8.91592	8.52407	8.52204	9.11274	0.000116748	0.0054551	0.452643	0.00205572	0.0310109	0.425322	0.785769	0.546684	-0.0273214
1633225_at	CG32278	1	9.87266	9.86179	9.85917	9.64519	9.78047	9.76102	9.86399	9.7052	9.91376	9.93886	9.77405	9.7091	9.96965	9.82205	9.86381	9.99129	9.98902	10.3053	10.1202	9.97243	10.1446	10.0699	9.97746	9.98135	9.83201	9.86944	9.84588	10.0261	9.95911	10.0862	9.97812	9.83818	9.98197	10.0431	9.88967	10.0004	0.000647338	0.0151539	0.210152	0.0043083	0.0495238	0.138741	0.0163014	0.108918	-0.0714111
1633283_at	CG6764	1	12.6681	12.6667	12.5457	12.4538	12.5713	12.525	12.6865	12.4904	12.6648	12.7307	12.5344	12.5346	12.7348	12.6997	12.7017	12.6641	12.7434	12.8154	12.8389	12.6727	12.7916	12.8049	12.71	12.6882	12.628	12.6562	12.7859	12.7924	12.7333	12.8919	12.8286	12.883	12.8175	12.8697	12.7416	12.8986	1.21e-05	0.0013638	0.149456	0.00043343	0.0118403	0.204566	0.0715254	0.234708	0.0551105
1633305_at	Obp99a	1	12.6129	13.1245	13.175	12.9194	13.2268	13.4057	12.3426	12.9233	13.5684	12.496	12.6964	11.9782	11.7059	11.9202	11.8471	12.3715	12.1293	12.8978	11.8122	11.8335	12.4431	11.6251	11.7645	11.2029	12.167	12.5188	11.7703	11.9906	13.0719	12.9989	11.4382	12.1554	12.5223	11.7345	11.7782	11.427	1.87e-07	0.000152077	-0.909685	9.42e-06	0.00117043	-0.741346	0.153629	0.315792	0.168339
1633473_s_at	Ald	1	12.0495	12.4183	12.3511	12.2129	12.057	12.0632	11.7959	12.0902	11.7494	11.8082	11.888	11.6695	11.8825	12.0831	12.1043	11.963	11.6899	11.7796	11.6464	11.803	11.5938	11.8684	11.7776	11.6033	12.0093	12.487	11.5989	11.3126	11.7208	11.5572	11.7078	11.6272	11.2847	11.6649	11.4469	11.4036	0.000168632	0.00686321	-0.196529	0.00116598	0.0222585	-0.361035	0.0723463	0.235819	-0.164506
1633488_at	aay	1	11.9445	12.1555	12.0164	12.1941	12.1078	12.0638	11.4772	12.0118	11.4621	11.3714	11.9276	11.6534	12.134	11.8822	11.6691	11.5974	11.0044	11.1655	11.4077	11.8706	10.7512	11.172	11.4189	10.9183	12.0055	11.658	11.5198	11.4202	11.4379	11.2239	11.5608	11.5638	11.1857	11.0526	11.6103	10.9081	0.00164236	0.0272631	-0.449518	0.000401329	0.0114511	-0.436568	0.858764	0.566608	0.0129498
1633540_at	CG8147	1	6.95399	8.17732	7.64348	6.41351	6.12356	5.74534	7.56954	5.89849	5.40097	7.06182	6.26517	7.41449	9.95777	8.053	9.86989	10.1732	9.24452	11.0033	11.0589	11.149	10.4977	10.0197	9.50539	10.4565	6.94021	8.56564	9.51772	8.56157	9.05072	11.1205	11.5199	10.4795	11.4903	11.8456	11.0007	11.423	7.93e-06	0.00106591	3.36011	8.27e-05	0.00450241	3.40398	0.912863	0.581482	0.0438765
1633599_a_at	Pepck	1	13.8192	13.962	13.8011	13.8061	13.6713	13.7989	13.362	13.7492	13.6945	13.1634	13.43	13.4223	13.544	13.5015	12.8729	13.2238	12.8118	13.3212	12.9976	12.9804	13.1476	12.8956	12.3929	12.6279	13.6917	13.648	13.2542	13.2093	13.3156	13.6041	13.4547	13.5192	12.8214	13.1798	13.4135	12.7052	5.16e-06	0.000890214	-0.613579	0.00384898	0.0457866	-0.321952	0.0117945	0.0907975	0.291627
1633675_at	CG30008	1	12.0434	12.28	12.3908	12.1525	11.8909	11.6438	11.4867	12.0345	11.7918	11.8244	12.0178	11.6419	12.3099	12.7767	12.7609	12.6833	12.4835	11.802	12.1892	12.455	11.9594	12.0221	12.5291	11.9818	12.2333	12.3207	12.3414	12.4314	12.2181	11.9512	12.2082	12.6917	12.079	12.1424	12.7486	12.3956	8.63e-06	0.00110952	0.396191	0.000538755	0.0134988	0.380241	0.845845	0.56306	-0.0159496
1633684_at	CG32444 /// DsimCG32444	1	12.3329	12.7955	12.4743	12.4452	12.0136	12.0184	11.69	12.2046	12.0237	11.726	12.082	11.3651	11.6761	12.0952	11.7153	11.9254	11.293	11.441	11.0785	11.5649	11.2982	11.2089	11.4287	11.0296	11.9878	12.3386	11.2812	11.047	11.6651	11.0307	10.8877	11.2202	10.7243	11.0394	11.2245	10.8834	1.52e-09	2.44e-05	-0.618051	8.65e-06	0.00110952	-0.820128	0.0854249	0.25276	-0.202078
1633770_at	CG11967	1	9.26797	9.73475	9.47596	9.54703	9.23474	9.38294	9.02876	9.27056	9.12615	9.03926	9.15758	9.08981	9.19667	9.42379	9.27885	9.43789	9.0379	9.21807	9.06834	9.31726	8.96953	8.94462	9.17744	8.86699	9.31288	9.3442	9.19213	9.08171	9.08913	9.03664	8.87859	9.23658	9.05353	8.8517	9.1685	8.80802	0.00380042	0.0455292	-0.118179	0.00188791	0.0296632	-0.191825	0.0758718	0.24084	-0.073646
1633834_at	CG9701	1	8.48524	9.33912	9.97937	10.0497	9.40997	10.2568	9.62908	9.7947	8.80356	8.3289	9.34694	9.91619	9.04377	8.67497	8.94455	9.06119	8.23243	9.00543	8.69873	8.76557	8.32224	8.20402	8.21023	8.48678	8.86172	8.99963	8.46234	7.88167	9.81291	8.57906	8.84185	8.46661	7.93945	7.99937	8.62033	8.36175	0.000399797	0.0114277	-0.807469	0.00321657	0.0409685	-0.876071	0.727671	0.52842	-0.0686016
1633840_a_at	CG8026	1	10.0251	10.0787	10.1005	9.82219	9.94973	9.90226	9.83861	9.97475	9.94355	9.7727	10.1437	9.88932	9.99955	9.95998	9.66029	9.5972	9.86311	9.44749	9.75296	9.64444	9.56197	9.81583	9.78194	9.80262	9.83577	9.6281	9.79036	9.98699	9.73891	9.57574	9.7002	9.843	9.61168	9.68703	9.9142	9.29365	0.00138558	0.0245644	-0.212804	0.00132753	0.0240811	-0.236285	0.74771	0.534709	-0.0234805
1633870_at	CG9436	1	10.4396	10.6672	10.7735	10.6712	10.6693	10.6356	10.4707	10.6411	10.4129	10.4778	10.662	10.4538	10.3208	10.4322	10.5985	10.5042	10.4029	10.4163	10.4464	10.5393	10.4271	10.4819	10.5256	10.4367	10.4339	10.6115	10.4637	10.3966	10.5784	10.4555	10.4083	10.5689	10.283	10.3241	10.4686	10.5277	0.00126786	0.0234226	-0.120245	0.00273683	0.0373172	-0.121223	0.978513	0.597797	-0.000978473
1634016_at	CG2781	1	10.6503	11.0685	11.1067	11.286	10.7235	11.1075	10.4939	10.8814	10.5286	10.4448	10.767	10.6396	10.7556	10.6235	10.9448	10.8431	10.1949	10.6782	10.3874	10.7291	10.4163	10.1982	10.633	10.5051	10.6755	10.8518	10.2457	10.0334	10.7265	10.5225	10.5085	10.4322	10.0695	10.2309	10.3927	10.0558	0.00132416	0.0240472	-0.232382	0.00318804	0.040767	-0.412712	0.13003	0.299228	-0.180331
1634463_at	CG7992	1	10.2577	10.1425	10.0326	10.2785	10.3762	10.3524	10.2173	10.361	10.2761	10.1781	10.268	10.1299	9.75726	10.2194	9.75224	10.1481	9.77044	9.852	9.98125	9.95489	9.93169	9.84844	9.81723	9.89796	10.1814	10.0473	10.0667	9.85762	10.0149	10.1816	10.0628	10.262	10.0789	9.84045	10.2865	9.95025	7.62e-05	0.00428658	-0.32829	0.00171439	0.0279951	-0.170013	0.0394672	0.176114	0.158277
1634477_at	CG42335	1	6.43954	6.28508	5.63606	5.84242	6.33485	5.87477	6.49098	6.81014	5.97367	6.37983	6.19803	6.1746	6.22424	7.00583	6.65682	7.17963	6.95712	6.8247	6.58866	6.7876	6.86014	7.10993	6.74755	7.24747	6.40233	6.36797	6.76975	6.50051	6.27217	6.92262	7.03025	7.16096	6.8387	7.21269	7.59595	6.73022	0.000621167	0.014803	0.645808	0.000865132	0.0183746	0.61368	0.826744	0.558037	-0.0321278
1634518_at	---	1	8.01941	7.99306	7.72726	7.88152	7.64714	7.81913	7.56182	7.6453	7.77548	7.75962	7.6579	7.68091	8.15304	8.20806	7.89248	7.81372	7.82882	8.18613	8.07744	8.02633	7.89391	7.85909	7.72044	7.88244	7.88267	7.98047	7.96525	8.00481	7.93014	8.14542	7.98512	7.97068	7.98657	7.96489	7.81771	8.12822	0.00116911	0.0222917	0.197779	0.00101162	0.0203027	0.216115	0.696031	0.518187	0.0183362
1634529_at	CG3290	1	8.54731	8.35019	8.90542	8.75105	9.53241	8.80744	9.40101	8.95289	8.72702	9.63932	8.89007	8.96521	10.0896	9.70426	10.9393	10.6896	11.3172	11.3071	11.1831	11.4009	11.1623	10.8808	10.4573	10.8441	9.26052	9.71375	10.5601	10.4508	10.2616	11.5931	11.1206	11.4008	11.8052	11.805	11.274	11.0685	8.61e-09	3.45e-05	1.87553	2.3e-06	0.000594522	1.90371	0.875313	0.571311	0.02818
1634652_a_at	CG7656	1	8.8172	8.93121	8.83549	9.18642	8.8983	9.07902	8.95512	9.09211	9.01263	8.77301	8.83453	9.07103	8.83566	8.71967	8.79339	8.93269	8.8192	8.85444	8.78251	8.82795	8.88382	8.79128	8.58803	8.84601	8.8413	8.87784	8.75416	8.97342	8.91891	8.78203	8.64417	8.72104	8.6916	8.65523	8.75443	8.59963	0.000430637	0.0117929	-0.150953	0.00203557	0.0308521	-0.18936	0.345164	0.400235	-0.0384078
1634664_at	Cyp309a2	1	7.60578	7.7976	8.14738	8.1186	8.0794	8.77525	7.80147	7.90742	7.82331	7.24921	7.32254	7.8551	7.23235	7.09411	7.3772	7.86122	7.25348	7.74693	7.21047	7.81552	7.5159	7.09697	6.9771	8.12154	7.37876	8.03226	7.28229	7.24222	8.21085	7.98503	7.27237	7.5203	7.2373	6.91925	7.27082	6.73797	0.00175711	0.0284714	-0.431691	0.00364982	0.0443384	-0.44947	0.92472	0.58453	-0.0177789
1634699_a_at	CG11919 /// CG18003	1	10.5218	11.0469	10.8784	10.5908	10.1394	9.96085	9.92294	10.1254	9.93924	9.88094	10.0791	9.88824	10.2427	10.2791	10.1131	10.6408	9.45026	9.83394	9.49307	10.3066	9.56694	9.82121	9.76072	9.39422	10.6204	10.4683	9.64157	9.37027	10.0825	9.27896	9.66711	9.86686	9.23317	9.34543	9.73527	9.55992	0.00311447	0.0400449	-0.339275	0.00131332	0.0239204	-0.508685	0.282597	0.377209	-0.169411
1634972_at	CG4802	1	10.7668	10.9226	10.9767	10.8791	10.8187	10.8295	10.7739	10.8635	10.9961	10.6731	10.7842	10.5966	10.5638	10.6976	10.5958	10.7311	10.6298	10.6748	10.5973	10.5323	10.6512	10.7592	10.735	10.5725	10.6372	10.7255	10.627	10.7656	10.7389	10.7197	10.4508	10.5243	10.4925	10.4809	10.5145	10.5206	0.00089344	0.0187704	-0.178359	0.000123355	0.00558773	-0.223613	0.237436	0.359699	-0.0452544
1634991_at	CG8083	1	7.92095	8.68602	8.45466	7.75712	8.60618	7.97816	8.69937	8.59189	7.82601	8.90191	8.32838	8.14928	7.91394	9.09315	9.18517	8.79171	8.86084	8.53288	9.19072	8.60609	8.61172	8.93229	8.85311	8.81424	7.98937	8.96393	8.67993	8.23258	8.82438	8.62962	9.21612	9.04599	8.59494	9.2551	8.99517	9.05816	0.000579517	0.0142046	0.457159	4.85e-05	0.00324213	0.465446	0.925046	0.58453	0.00828761
1635137_a_at	CG5946	1	11.3107	11.6477	11.6155	11.4617	11.2662	11.3849	11.1129	11.29	11.185	10.9137	11.1693	11.1324	11.2108	11.3859	11.2901	11.3641	10.7816	11.1709	10.9157	11.2519	11.0013	10.9984	11.1763	10.9139	11.3132	11.4884	10.9417	10.7313	11.1345	10.9581	11.0285	11.0887	10.8618	10.802	10.975	10.9511	0.00291144	0.038552	-0.169089	0.00200883	0.0305804	-0.267963	0.2119	0.347259	-0.0988745
1635321_at	CG14688	1	10.8127	11.2171	11.5017	11.0987	10.9701	10.6275	10.9481	11.01	10.4134	10.793	10.8613	10.739	10.3094	10.8551	10.6471	10.7305	10.1504	10.0499	10.7476	10.6424	9.91622	10.4164	10.4566	10.3066	10.7026	10.8832	10.512	10.4223	10.7272	10.3668	10.7576	10.3561	9.83111	10.3034	10.4393	10.5169	2.9e-06	0.000674975	-0.480365	0.000117365	0.0054551	-0.431192	0.545253	0.470822	0.049173
1635450_a_at	smp-30	1	11.1011	11.3876	11.4455	11.3757	10.9931	10.9851	10.3745	11.1603	11.1503	10.9511	10.883	10.5071	10.6136	10.6315	10.6056	11.3987	10.5115	10.6591	10.557	11.1518	10.7303	10.7452	10.6135	10.0819	10.7839	10.6874	10.1957	10.1913	10.6737	10.7834	10.3037	10.5943	10.7566	10.6279	10.5833	10.6046	0.00287555	0.0382817	-0.334546	0.00244715	0.0350057	-0.460721	0.346462	0.400657	-0.126175
1635498_at	CG9259	1	9.92593	10.873	11.374	10.9526	10.839	10.8333	10.0998	10.8147	10.9396	9.86703	10.8122	9.33616	9.90134	10.4299	10.7757	10.8379	10.3791	10.1814	9.4116	10.4603	10.5132	9.92875	10.392	9.52264	9.89389	10.75	10.1371	10.3073	10.7858	9.80387	9.2019	9.9084	9.593	9.02608	9.93711	9.04932	0.00229247	0.0335411	-0.327795	0.000292694	0.00945008	-0.689457	0.0129854	0.0966486	-0.361662
1635601_at	CG42335	1	7.21626	7.53711	6.62185	6.97762	7.67346	7.17995	7.76505	7.47997	7.15639	7.72019	7.4273	7.59045	7.50264	8.11267	7.75043	8.02886	8.10764	7.89533	8.02138	8.00024	7.94895	8.29744	8.09599	8.53594	7.76326	7.54859	7.95487	7.26909	7.51572	7.88414	7.92696	8.26135	8.13663	8.57617	8.25451	8.30919	5.15e-06	0.000890214	0.662659	0.000650456	0.0151905	0.587906	0.505282	0.45622	-0.0747526
1635674_at	CG6901	1	6.08799	6.8278	5.81773	5.63033	6.18801	6.43936	6.3341	6.26284	6.47318	6.81432	6.02761	6.38277	6.4057	6.56287	6.71633	6.80089	6.52677	6.99394	6.96358	6.93011	6.99153	7.21569	6.70176	7.22475	6.43277	6.73373	6.41695	6.00481	6.45168	7.10144	7.01306	6.66683	7.35591	6.75291	6.82051	6.65892	0.000204455	0.00769136	0.562323	0.000584786	0.0142297	0.426958	0.200391	0.34134	-0.135365
1636287_at	CG10592 /// DanaCG10592 /// DereCG10592 /// DperCG10592 /// DpseGA10422 /// DsecCG10592 /// DsimCG10592 /// DyakCG10592	1	10.1923	9.69494	9.69558	9.50702	10.6523	9.78268	10.5239	10.4707	10.4909	10.6998	10.9716	9.76401	11.2036	11.3181	11.4138	11.1371	11.4864	11.3249	11.6442	11.5587	11.661	11.4344	11.5639	10.8394	10.0921	10.7999	10.9989	11.1719	10.6122	12.2662	11.7139	12.0494	12.3436	12.2795	12.148	11.9651	3.02e-07	0.00017486	1.17833	9.54e-05	0.00495074	1.33291	0.486187	0.450924	0.154586
1636351_at	CG17333	1	10.9116	11.1	11.111	10.9607	10.7976	10.7938	10.6022	10.8137	10.8578	10.6157	10.7305	10.6112	10.5151	10.8592	10.8169	10.872	10.5502	10.6637	10.6003	10.7387	10.5499	10.6778	10.7231	10.5246	10.6893	10.9764	10.5759	10.4962	10.6821	10.5623	10.4559	10.5739	10.4685	10.4836	10.5462	10.6065	0.00375463	0.0452344	-0.15118	0.000311815	0.0097625	-0.232401	0.128488	0.297707	-0.0812211
1636611_at	Try29F	1	6.19735	6.98946	7.14455	7.22257	6.15564	6.84657	6.58202	6.95378	6.80046	6.1423	7.84932	6.35521	5.72705	6.43859	5.81971	6.1332	5.72065	5.88111	6.37523	5.5232	5.52846	5.7011	5.46448	5.86503	6.05253	6.2649	7.89363	6.40289	6.01481	6.17565	5.74085	6.04383	5.82658	5.60515	6.21599	5.63503	0.000316	0.0098202	-0.921784	0.00365975	0.0443583	-0.613949	0.13969	0.307114	0.307836
1636620_s_at	l(2)08717	1	9.79486	10.8794	10.7728	10.5483	10.5164	10.4787	10.3311	10.205	10.2833	10.1699	10.0672	10.2864	9.97935	10.9979	10.9867	11.2501	10.6105	11.1376	10.9747	11.2478	10.9667	10.6024	10.8332	10.7535	9.95062	11.1485	10.9331	10.3644	11.0002	11.6022	11.3041	11.0892	11.5186	11.4677	11.1197	11.2288	0.000119121	0.00551492	0.500593	0.000489605	0.0127868	0.699488	0.151565	0.314737	0.198895
1636885_at	CG17560	1	10.7216	11.2944	11.7358	11.3956	9.78402	9.31279	10.4555	11.2473	9.25025	10.3372	11.1457	10.0515	11.2752	11.5573	11.9848	11.5521	10.5185	9.73803	10.3363	11.3808	9.6675	10.5886	11.3143	10.8327	11.2145	11.5989	11.4492	11.1201	10.1184	9.5559	10.776	11.7285	9.81323	10.9288	11.6488	10.6921	0.000984878	0.0199185	0.334545	0.00382171	0.0456655	0.326077	0.93233	0.586173	-0.00846825
1636967_a_at	CG5315	1	12.6051	12.9605	12.8433	13.0357	12.7539	12.8494	12.3709	12.7315	12.493	12.2237	12.4992	12.3751	12.4037	12.5925	12.6282	12.5742	12.2182	12.4316	12.0401	12.4672	12.328	11.9454	12.3134	11.9882	12.5111	12.8618	12.3392	12.0177	12.6933	12.3255	12.2153	12.3421	12.1479	12.0402	12.1531	11.7162	1.57e-06	0.00048112	-0.317548	0.000921	0.0191277	-0.364825	0.573157	0.479859	-0.0472763
1637346_at	CG33514	1	8.80737	9.02998	8.63338	8.62535	8.91923	9.11044	9.25324	8.93467	9.04073	9.04133	8.78225	9.01006	9.22518	9.4656	9.35135	9.34851	9.18354	9.52575	9.56348	9.19441	9.80059	9.62537	9.58688	9.50287	8.9946	9.00532	8.95496	8.6305	8.88536	9.53553	9.19246	9.4839	9.57108	9.30932	9.35214	9.64368	2.01e-06	0.000536785	0.515457	0.00347151	0.0429201	0.280901	0.0124245	0.0939339	-0.234557
1637479_at	pn	1	8.9659	9.00388	8.94205	9.08835	8.89953	8.97144	8.55495	8.88363	8.86645	8.72352	8.71497	8.71634	8.59129	8.82078	8.50005	8.90357	8.70509	8.60588	8.52919	8.65452	8.53823	8.52092	8.57463	8.48358	8.74396	8.78484	8.67187	8.86027	8.76033	8.56466	8.47403	8.66403	8.53833	8.42104	8.64856	8.1886	1.71e-05	0.00165852	-0.241938	3.68e-05	0.00281247	-0.250874	0.80535	0.552237	-0.00893548
1637660_at	CG5150	1	9.7795	9.30273	9.5256	9.24394	10.4345	9.43809	10.3275	10.3406	10.1107	10.4174	10.9267	9.42064	10.5793	11.0395	11.2091	11.0469	11.2729	11.0461	11.2496	11.3124	11.2775	11.277	11.3928	10.6401	9.3663	10.8631	10.9436	10.9764	10.5315	12.0927	11.5805	11.7913	12.104	12.0831	11.8672	11.5147	1.59e-06	0.00048112	1.17294	0.000153553	0.00653132	1.37054	0.3503	0.402413	0.197592
1637847_at	CG5362	1	13.5286	13.6087	13.5945	13.4495	13.3843	13.4075	13.3178	13.3854	13.5143	13.4221	13.4096	13.3459	13.3904	13.5176	13.4022	13.4246	13.3364	13.3748	13.2291	13.358	13.3587	13.4113	13.2952	13.2583	13.4314	13.4875	13.335	13.3346	13.3176	13.3251	13.2257	13.2564	13.2433	13.3745	13.3147	13.2376	0.000373442	0.0109476	-0.0842903	7.42e-05	0.00423393	-0.123722	0.015668	0.106449	-0.0394313
1637857_at	lectin-24A	1	9.78077	9.74847	9.88275	9.46297	9.53321	10.1217	9.9875	9.0658	9.74534	9.1924	9.56683	8.73112	8.37307	9.04939	8.77564	8.88366	8.65552	9.69729	9.40187	8.83908	9.51632	8.97295	8.60817	7.90284	8.96488	9.15438	8.79181	8.60265	8.55826	9.65278	8.4642	9.17663	9.28539	8.21029	8.37844	8.66726	6.27e-05	0.00379241	-0.678585	0.000192509	0.00740874	-0.742653	0.660993	0.507681	-0.0640679
1638104_a_at	CG9960 /// snapin	1	9.07327	9.15839	9.02762	9.00927	8.88437	8.94985	8.98383	8.86795	8.95574	8.84934	8.96749	8.88189	8.71722	8.78378	8.74728	9.04668	8.86502	8.79078	8.90008	8.7684	8.71643	8.80737	8.8103	8.84543	8.97962	8.85906	8.73975	8.74296	8.74902	8.77596	8.74279	8.7323	8.62689	8.64518	8.75534	8.81474	0.0026566	0.0367361	-0.150853	4.23e-06	0.000795137	-0.203783	0.212608	0.347431	-0.0529304
1638184_at	CG13936	1	4.42199	4.89695	4.49848	4.90946	4.91567	4.56574	4.75343	4.93062	4.93909	4.86544	4.99617	4.77426	4.64855	5.46762	5.92277	5.69489	5.37092	6.05332	5.60255	6.34486	5.75158	5.12875	5.21825	5.27717	4.7541	4.77129	4.89501	4.99122	5.34292	5.72213	5.03219	5.46108	5.7568	5.18519	5.36087	5.1266	0.000174701	0.00703873	0.751163	0.001125	0.0218137	0.411008	0.016701	0.110346	-0.340154
1638285_a_at	Gyk	1	10.8244	11.1072	10.9432	10.8245	10.6258	10.9472	10.4523	10.6231	10.5819	10.4499	10.3583	10.4443	10.5377	10.8735	10.6308	10.7615	10.3136	10.6223	10.2454	10.4768	10.4161	10.4079	10.3971	10.2457	10.7276	10.6832	10.0954	10.192	10.4462	10.498	10.4086	10.2591	9.93174	10.1326	10.3368	10.0984	0.000179245	0.00711459	-0.187824	0.000463236	0.0124218	-0.364399	0.0392105	0.175632	-0.176574
1638335_at	CG18493	1	10.4186	10.3906	10.2647	10.4112	10.64	10.301	11.3159	10.699	10.3866	10.9777	10.6308	11.1572	11.0334	10.7539	10.9589	10.7835	11.1009	10.7047	11.4765	10.9405	11.0282	11.4681	11.1612	11.9275	11.004	10.5551	10.51	10.3081	10.7216	10.9898	11.3815	11.0833	10.9492	11.2903	11.2195	11.3647	1.94e-06	0.000526337	0.47866	0.00110016	0.0215404	0.31532	0.0544227	0.207291	-0.16334
1638368_at	CG31674	1	8.039	8.11392	8.24575	8.13236	8.05422	8.2346	8.24909	8.02626	7.98616	8.38707	8.18396	8.10285	8.27561	8.17834	8.43565	8.34598	8.38471	8.73577	8.68287	8.50593	8.24052	8.6632	8.46608	8.5688	8.30685	8.16493	8.27715	8.1034	8.28521	8.2636	8.34874	8.32722	8.39013	8.50405	8.21977	8.47728	6.65e-06	0.00099632	0.310686	0.00346372	0.0428569	0.159425	0.00918913	0.0777997	-0.151261
1638424_at	CG10514	1	10.7445	11.0918	11.5382	11.0772	10.911	11.2187	10.8401	11.0468	11.4034	10.7993	11.0687	10.364	10.4935	10.7507	10.75	10.8405	10.4284	10.6421	10.0703	10.4236	10.6287	10.6026	10.5792	9.54001	10.4597	10.8846	10.1804	10.2453	11.0147	9.81572	9.33464	9.6946	9.28433	9.21796	9.9747	9.46571	7.53e-06	0.00106591	-0.5295	0.000168038	0.00685641	-1.04427	0.0106702	0.0856796	-0.514772
1638695_at	CG3415	1	10.9873	11.286	11.1104	11.1787	11.1663	11.1579	11.0546	11.0704	11.0364	10.9898	11.1583	10.9972	10.9825	11.1058	11.0437	11.1458	10.9059	10.9432	10.8621	11.0159	10.9494	10.9325	10.9071	11.0401	11.0683	11.1582	10.8779	10.5551	10.9704	10.897	10.9577	10.9978	10.8091	10.6418	10.9084	10.7	0.00265747	0.0367361	-0.113275	0.000968839	0.0197182	-0.22098	0.10257	0.273489	-0.107706
1639359_at	CG31974	1	10.4307	10.6082	10.7656	10.7455	10.9995	10.7271	10.9769	10.9807	10.6188	11.0086	10.8918	10.7241	10.561	11.0021	11.3158	11.0715	11.1238	11.0853	11.1867	11.3387	11.0152	11.0784	11.1857	11.1406	10.6074	11.3259	11.0557	10.9248	11.0701	11.3534	11.3034	11.4055	11.4795	11.3974	11.2934	11.1243	1.43e-05	0.00149479	0.302285	8.13e-05	0.00446656	0.405286	0.119327	0.289123	0.103001
1639625_at	Vps25	1	9.98828	10.0973	10.0123	10.088	10.076	10.164	10.1124	10.068	10.0092	10.0475	10.0067	10.1738	10.0203	10.0892	10.1831	10.0621	10.1503	10.3445	10.3478	10.2656	10.1128	10.175	10.1467	10.3448	10.0654	10.1691	10.1763	9.98857	10.1606	10.2354	10.2406	10.1323	10.1756	10.1247	10.0701	10.2323	0.000512519	0.0130455	0.116554	0.00220835	0.0328417	0.0772857	0.0964667	0.266016	-0.0392678
1639892_at	Sodh-1	1	11.1168	11.6925	11.6035	11.438	11.275	11.2793	10.3221	11.0824	11.1204	10.5438	10.8876	9.93695	10.7204	10.6269	10.6547	11.0909	10.5212	11.1409	9.88413	10.8218	10.5862	10.6172	10.656	9.93756	10.7862	11.0388	10.3632	10.0854	10.8085	10.242	10.073	10.1721	10.2315	10.2543	10.1385	10.1723	0.00176831	0.0284714	-0.420051	0.000422221	0.0116685	-0.661042	0.10781	0.278388	-0.240992
1640065_at	GstE7	1	10.9074	11.1098	11.41	11.27	11.0245	10.9016	11.1056	11.3903	10.8311	10.8944	10.9941	11.1236	10.6492	10.7692	10.5876	10.8072	10.3423	10.484	10.8215	10.9112	10.5107	10.7045	10.7206	10.6026	10.9671	10.7081	10.4757	10.8116	10.852	10.6001	10.7472	10.8327	10.6606	10.5485	10.7348	10.864	8e-06	0.00106591	-0.420969	0.000440422	0.0119905	-0.34665	0.229963	0.35609	0.0743188
1640085_at	CG9733	1	6.77317	6.80764	8.41766	8.50347	7.80341	8.81761	7.34863	7.89557	6.90031	5.71236	7.84471	7.85284	6.83963	6.23569	6.47157	5.786	5.90983	6.04668	5.9426	5.92107	5.87434	5.10724	5.35282	5.89506	6.84417	6.60766	6.38912	6.0001	8.14593	6.30414	6.44594	6.70931	5.64545	5.56961	6.67981	5.29339	7.41e-05	0.00423393	-1.6079	0.00266874	0.0368602	-1.17023	0.0689063	0.230523	0.437676
1640126_at	CG8249	1	8.40647	8.5681	8.83454	8.56664	8.28367	8.55343	8.51704	8.5848	7.9872	8.16622	8.03936	8.24006	8.21249	8.28391	8.2521	8.38987	7.7504	7.8436	8.1478	7.98401	7.70301	8.17079	8.10958	8.00212	8.39354	8.33833	7.905	7.46851	7.94756	8.13547	8.07679	8.1559	7.9981	7.85443	8.04341	7.67159	0.000732431	0.0164264	-0.324821	0.00222113	0.0329177	-0.396574	0.500845	0.454863	-0.0717531
1640227_at	CG8801	1	12.3071	12.2403	12.1612	12.0822	12.1268	12.2063	12.3853	12.2463	12.2321	12.3911	12.1298	12.1027	12.3643	12.2879	12.2888	12.0947	12.2136	12.3565	12.342	12.2167	12.3487	12.4842	12.2127	12.3077	12.1708	12.282	12.3048	12.3453	12.3429	12.6512	12.5886	12.5303	12.4439	12.4809	12.5205	12.3492	0.0040164	0.0471832	0.0755722	0.000938083	0.0193223	0.199938	0.0212101	0.126062	0.124366
1640429_a_at	CG6145	1	10.5171	10.8991	10.8686	10.8929	10.8979	11.0126	10.7633	10.7869	10.6111	10.7404	10.6776	10.6028	10.834	11.022	11.1074	11.0511	11.1369	11.1618	10.9652	11.1126	10.7515	10.8317	10.9419	11.0298	10.6529	11.1449	10.897	10.9103	11.0271	11.0805	11.1498	11.0591	10.9611	11.0559	10.9868	10.7567	8.14e-06	0.00106591	0.222955	0.00020913	0.00774481	0.200982	0.670024	0.51068	-0.0219726
1640451_at	CG10863	1	12.8968	13.0665	12.9937	12.9151	12.6885	12.6977	12.5303	12.8218	12.7516	12.5479	12.6716	12.583	12.5939	12.8011	12.7118	12.8371	12.3998	12.4214	12.3064	12.6078	12.5374	12.4335	12.6254	11.9854	12.6506	12.7028	12.5059	12.4947	12.5661	12.4515	12.1992	12.4295	12.1342	12.1607	12.3531	12.3336	9.74e-05	0.00498589	-0.241958	1.45e-06	0.000463946	-0.348553	0.123925	0.293966	-0.106595
1640488_a_at	CG9510 /// CG9515	1	9.85855	10.6218	10.227	10.5606	10.2966	10.1588	10.0741	10.3009	10.1458	9.8751	10.1178	10.0451	10.0152	10.0096	9.8655	10.3824	9.63046	10.009	9.68085	10.0679	9.74675	9.64665	9.82259	9.73687	10.1631	10.1435	9.67584	9.2429	9.86494	9.5211	9.42863	9.67043	9.51526	9.52781	9.56913	9.55888	0.000454962	0.0122614	-0.305692	0.000313341	0.0097625	-0.533388	0.0512119	0.201238	-0.227696
1640529_at	CG15408	1	8.6245	9.05754	9.04895	9.23797	8.72657	9.09398	8.53199	8.86777	8.8286	8.55144	8.53889	8.53594	8.73525	8.91942	8.89358	9.06388	8.24349	8.14864	8.1677	8.51883	8.17318	8.34561	8.34	8.25788	8.68228	9.01571	8.23791	8.27924	8.71176	8.17069	8.20418	8.29611	7.79591	7.93848	8.30982	7.97894	0.00197042	0.0302812	-0.319724	0.00091859	0.0191277	-0.501928	0.0953682	0.264243	-0.182204
1640549_at	Tal	1	12.2247	12.5884	12.7304	12.403	12.0902	12.0633	12.0096	12.2917	12.2957	12.009	12.3855	11.9486	12.0994	12.2333	12.2514	12.2585	11.9475	11.8856	11.7799	12.1268	11.902	12.0105	12.1254	11.8321	12.1244	12.435	12.0077	11.993	11.935	11.7337	11.774	11.9811	11.6905	11.8209	12.0282	11.9119	0.000183494	0.00721566	-0.215651	0.000339785	0.0102034	-0.300392	0.0651853	0.225529	-0.0847411
1640590_at	CG32195	1	9.04412	9.34211	9.63444	9.72684	9.3063	9.57113	8.97285	9.52762	9.23531	8.75291	9.15551	8.96156	8.92461	9.02566	8.98246	9.27529	8.74134	9.13661	8.59711	9.01809	8.73864	8.70208	8.70669	8.82256	8.99614	8.95275	8.37956	8.41796	9.2529	8.86199	8.86763	8.84127	8.7503	8.52697	8.92442	8.34432	2.29e-05	0.00207778	-0.379964	0.00174734	0.0284174	-0.509541	0.271818	0.37207	-0.129577
1640594_at	CG3011 /// DsecCG3011	1	11.8777	11.9432	11.7842	11.74	11.6452	11.6411	11.778	11.7596	11.8178	11.5059	11.7124	11.8568	11.886	11.6434	11.5153	11.4485	11.4899	11.3288	11.341	11.3835	11.5414	11.6676	11.5306	11.6779	11.8411	11.521	11.4875	11.5794	11.4574	11.3685	11.3286	11.4957	11.3465	11.531	11.5307	11.2654	0.000840541	0.0180646	-0.217323	0.000282992	0.00928589	-0.275757	0.194521	0.338534	-0.0584346
1640956_at	CG4725	1	7.87174	8.60258	8.35195	8.55247	8.03737	8.20045	7.70706	8.01462	7.48053	7.47593	7.7309	7.9993	7.6577	7.94877	7.91996	8.264	7.18835	7.23782	7.23495	8.16882	7.2473	7.03034	7.4418	7.61947	8.20888	8.14281	7.62653	7.23737	7.81618	7.01179	7.56146	7.59194	6.90248	6.57695	7.5881	7.18302	0.000471652	0.0125059	-0.422133	0.00205112	0.0310109	-0.548116	0.398242	0.419912	-0.125982
1641148_a_at	AcCoAS	1	13.1402	13.3929	13.4447	13.2279	13.0366	12.9232	12.8911	13.2118	13.018	12.857	13.15	12.9004	13.0937	13.2608	12.9773	13.0343	12.5434	12.74	12.6775	13.0064	12.3913	12.5172	12.846	12.5005	13.0383	13.1117	12.6914	12.54	12.7594	12.6315	12.8607	12.9902	12.5169	12.6052	12.9229	12.6166	7.45e-05	0.00423393	-0.300467	0.000288454	0.00938239	-0.32576	0.682602	0.514422	-0.025293
1641270_at	CG8745	1	10.0883	11.0197	10.8576	11.0614	10.7172	10.5332	10.6812	10.5291	10.1629	10.4258	10.3746	10.472	10.688	10.4339	11.4957	11.1195	10.8859	11.7779	11.5912	11.7792	11.2182	10.9516	11.0654	11.4807	10.2807	11.3465	11.2481	10.6007	11.4103	11.879	11.6105	11.4537	11.9604	11.7705	11.1228	11.421	0.00191735	0.0298502	0.630358	0.00106564	0.0210725	0.765104	0.368994	0.408504	0.134747
1641434_at	CG32695	1	10.7463	11.0814	11.1101	11.2376	11.1491	11.3287	10.895	10.9505	10.6498	10.9864	10.5237	10.8819	11.2388	11.3638	11.4971	11.6443	11.2539	11.6325	11.509	11.69	11.2236	11.2521	11.2351	11.271	11.1585	11.3958	11.0241	11.0337	11.3454	11.4155	11.4393	11.3912	11.4557	11.2235	11.2012	11.5673	7.26e-06	0.00104927	0.439242	0.00301457	0.0392054	0.34256	0.235992	0.359084	-0.0966822
1641502_a_at	CG9391	1	9.64326	9.77847	9.76268	9.8578	9.77788	9.87074	9.64319	9.81747	9.7032	9.47365	9.54845	9.73816	9.46771	9.56081	9.61412	9.76376	9.56114	9.60937	9.49006	9.69521	9.59987	9.4043	9.39088	9.44347	9.67755	9.83251	9.56446	9.60301	9.6365	9.55726	9.40552	9.49017	9.44469	9.39726	9.45604	9.6777	3.78e-06	0.000767963	-0.167856	0.00150742	0.0260759	-0.156024	0.803806	0.551893	0.0118317
1641610_at	Mur18B	1	12.4128	12.3429	12.4779	12.5637	12.4344	12.6295	12.3829	12.4555	12.6604	12.1476	12.2718	12.5077	12.3199	12.3386	12.4229	12.5043	12.3064	12.0637	11.8026	12.0419	12.3245	12.1595	12.1074	12.0038	12.2144	12.4808	12.0091	12.211	12.3855	12.0173	11.8586	12.0378	11.5629	11.7253	12.1071	11.9227	0.00344001	0.0426623	-0.240957	0.00116451	0.0222585	-0.396199	0.0693969	0.231499	-0.155242
1641634_at	Lsp2	1	10.2633	10.8528	11.0185	11.2008	11.093	10.1077	10.1393	11.5909	10.8923	9.68042	10.0513	9.58598	7.7626	8.32469	6.48518	8.05032	6.66087	8.47238	7.62133	8.56504	6.69886	7.00403	5.84427	6.93622	9.54773	10.8729	8.66367	7.12112	10.5603	7.91569	8.3621	7.72029	7.38534	7.08881	7.46479	7.73349	1.55e-07	0.000145181	-3.17087	0.000121584	0.00553089	-2.16999	0.0379632	0.172747	1.00088
1622960_at	decay	2	10.0943	10.2924	10.0813	10.3957	10.4909	10.6273	10.9329	10.5946	10.3715	10.4322	10.472	10.9495	10.5155	10.7701	10.6901	10.5335	10.7601	10.764	10.9508	10.7135	10.9016	10.9467	10.8428	11.4103	10.571	10.5166	10.5755	9.97536	10.5133	10.45	10.6396	10.7566	10.7461	10.4388	10.6918	10.9465	8.84e-05	0.00471186	0.338715	0.304517	0.38538	0.0905414	0.00117109	0.0223028	-0.248173
1623027_s_at	CG6271 /// CG6277	2	8.4333	9.20985	8.10312	8.24965	9.04864	9.46107	8.44526	8.53501	8.66856	8.4369	8.75666	8.36272	9.39217	9.07069	9.27198	9.007	8.68292	9.8153	8.72532	9.08359	9.17027	9.28871	9.6356	8.97932	7.92005	7.89329	8.84992	8.11271	8.0083	8.37036	7.69259	8.73032	8.74075	8.85472	9.10249	9.21061	0.00170233	0.0279119	0.534344	0.405231	0.422397	-0.185386	0.000417156	0.0116539	-0.71973
1623117_at	CG31781	2	9.60589	10.4951	10.4735	9.90414	9.6655	10.1102	9.43412	9.53718	9.2885	9.29208	9.48817	9.46929	10.701	10.5979	10.8501	10.6309	9.82623	10.7935	10.2503	10.7523	10.5085	10.0525	10.3842	10.4836	10.0843	10.536	9.78168	9.17916	10.1871	10.0262	10.3281	9.98404	9.50523	9.6167	9.72923	9.61338	2.44e-05	0.00215678	0.755621	0.294529	0.381191	0.150622	0.00190069	0.0296775	-0.604999
1623229_at	CG7881	2	7.44779	7.53291	7.12093	7.71458	7.63173	7.54797	7.75707	7.58216	7.4613	7.78902	7.63138	7.01651	7.85019	7.83829	7.6589	7.6373	7.76578	7.7824	7.89908	7.8504	7.52519	7.81607	7.94236	7.60193	7.54268	7.4937	7.1327	7.58764	7.29557	7.39192	7.25858	7.33211	7.32669	7.19864	7.17562	7.29366	0.00142444	0.0251342	0.244546	0.0303649	0.154088	-0.183652	1.45e-05	0.00151401	-0.428199
1623284_at	CG10251	2	5.07161	5.43911	4.96822	4.67312	4.88289	5.29036	5.03571	5.07478	4.34484	5.25672	4.85935	4.47558	4.02635	4.44229	4.08775	4.55025	4.07431	4.10557	4.48239	4.30796	3.86529	4.03823	3.99873	4.08772	4.82501	4.64786	5.0324	4.95558	5.16482	4.73398	5.07204	4.56731	4.5515	4.64799	4.65798	4.32201	6e-06	0.00095296	-0.775456	0.113806	0.283507	-0.182819	1.41e-05	0.00149479	0.592637
1623438_at	CG9505	2	6.78209	7.05706	7.54503	6.99594	6.67658	6.83928	7.03432	6.67562	6.96808	6.99825	6.88081	6.91639	6.91145	7.2718	8.00889	7.74529	7.18304	7.68562	7.57264	7.93292	7.42974	7.85701	7.40427	7.66458	6.55494	7.438	7.19544	6.66972	7.24145	7.17684	6.95721	7.06026	7.11762	7.0656	7.17553	7.14767	2.63e-05	0.00226804	0.608153	0.199868	0.341131	0.119237	0.000885205	0.0186527	-0.488916
1623521_at	CG11909	2	12.6342	12.8028	12.6978	13.0615	12.6775	13.012	12.3782	12.514	12.8349	12.5473	12.9417	12.6504	11.8949	12.2395	11.8097	12.4363	11.1733	12.3388	11.3828	11.6782	12.0578	11.4952	11.3175	11.8115	12.8408	12.6577	12.6777	12.4155	12.0586	12.6012	12.573	12.3867	12.5283	12.5896	12.3548	12.3754	9.96e-07	0.000354889	-0.926394	0.0255966	0.140312	-0.224427	3.88e-05	0.00289511	0.701968
1623532_at	CG34236	2	9.24892	9.19945	9.16346	9.41456	9.36138	9.81158	10.0627	9.53224	9.38056	9.56472	9.12305	9.90788	9.79789	9.83698	9.83085	9.92962	9.95231	10.4138	10.4541	9.84782	10.1878	10.2711	9.91495	10.6787	9.76073	9.6383	9.54649	8.84307	9.74979	9.73785	9.83113	9.85527	10.0515	9.33403	9.77232	10.1489	2.68e-08	5.47e-05	0.612112	0.0940825	0.262724	0.208238	0.00255417	0.035802	-0.403874
1623601_at	Amyrel	2	6.29965	6.81288	5.81688	5.60475	6.71501	6.562	6.21593	6.22352	6.41989	6.43374	6.6031	6.14338	6.49662	5.66809	5.41204	5.9512	5.92206	6.05047	5.47512	5.57319	6.34872	5.80361	5.94517	5.85594	6.43307	6.46635	6.65646	6.15981	6.23833	5.88431	6.35857	6.54621	6.44953	6.57699	6.46069	6.06811	0.00420779	0.0485493	-0.44571	0.767044	0.540586	0.0373093	0.00329479	0.0415033	0.483019
1623669_at	CG16836	2	12.2434	12.5971	12.0036	12.8551	12.7472	13.2192	12.2439	12.2303	11.899	12.2998	11.9902	12.6763	12.7994	12.8373	12.9933	13.2116	12.9201	13.1305	13.145	13.2635	12.8679	12.5932	12.9195	13.0486	12.7332	12.4566	12.6479	12.5348	12.7222	12.2588	12.5333	12.745	12.8851	12.5572	12.8239	12.85	0.00039402	0.0113231	0.560393	0.169244	0.32519	0.228573	0.00200281	0.0305286	-0.331819
1623690_at	CG17190	2	7.68466	7.775	7.65004	7.84028	7.61529	7.84708	7.63188	7.62687	7.64204	7.79322	7.71347	7.46956	7.64948	8.04484	7.80042	8.01852	8.17333	8.06159	8.0956	7.91348	7.97403	8.03431	7.90844	8.04967	7.92572	7.84729	7.60159	7.71799	7.61075	7.82908	7.84644	7.78391	7.78493	7.55084	7.65169	7.83125	0.000157007	0.00662886	0.286191	0.27011	0.371364	0.0576725	0.00243797	0.0349054	-0.228519
1623710_at	CG5847	2	3.81203	3.97331	3.96481	3.83469	4.11013	3.95356	3.92839	4.06706	3.82087	4.04029	3.77455	4.18334	4.22622	4.28597	4.19648	4.41462	4.24218	4.92857	4.4861	4.90369	5.39888	4.16515	4.90229	5.62954	3.98166	3.99998	3.89273	3.96051	3.85921	3.82824	3.72248	4.08877	4.14237	3.72872	3.83058	4.11013	0.000546872	0.013617	0.693056	0.628127	0.49804	-0.02647	0.00012617	0.00565142	-0.719526
1623843_at	CG5903	2	11.8345	11.8992	11.91	11.9333	11.8767	11.7699	11.9688	11.7993	11.8313	11.9026	11.8488	11.763	11.9912	11.9569	11.907	11.9748	11.8997	12.0238	12.0278	12.0013	11.8502	12.0529	11.9637	11.9104	11.9086	11.937	11.8184	11.7789	11.9376	11.9475	11.773	11.8173	11.8342	11.8895	11.7446	11.9361	0.0011464	0.0221424	0.101869	0.972383	0.596141	-0.00120971	0.00409181	0.0478587	-0.103079
1623849_s_at	CG6726	2	11.0589	11.1296	11.2485	11.2832	11.2094	11.3949	11.265	11.2597	11.3412	11.318	11.1628	11.2053	11.3383	11.3843	11.5652	11.4411	11.7676	11.44	11.4485	11.5882	11.5456	11.5078	11.4008	11.3188	11.2404	11.0634	10.9886	11.2573	11.2754	11.3294	11.1033	11.3963	11.2633	11.129	11.2347	11.3405	5.09e-05	0.0033468	0.239155	0.612311	0.492754	-0.0212361	0.000280354	0.00925027	-0.260391
1623851_at	CG9400	2	6.56976	7.0119	7.06616	7.06845	6.41179	6.6326	6.43674	6.5364	6.17283	6.53798	6.64308	6.28501	6.86183	6.87273	7.26703	7.21473	7.11139	7.3397	6.80799	7.28794	6.67479	6.66374	6.84765	6.45927	6.64376	6.70769	6.19295	6.75154	6.91722	6.57167	6.52603	6.41928	6.44322	5.86739	6.24455	6.5223	0.00145152	0.0253423	0.33634	0.28472	0.378169	-0.130427	0.000736855	0.0165026	-0.466767
1624402_at	CG17906	2	7.07716	6.87797	6.59018	6.37981	7.10796	6.68038	6.41277	7.26588	7.03103	6.9028	6.78164	6.47743	5.89666	6.34537	5.88136	6.55312	6.14192	5.81925	6.4625	5.94162	5.97593	6.07998	6.36154	5.70133	6.77088	6.869	6.60614	6.67752	6.70035	6.83184	6.6817	6.99294	6.72912	6.57934	6.86167	6.73927	0.000243404	0.00856039	-0.702037	0.562597	0.476675	-0.0454371	1.37e-05	0.00149479	0.6566
1624409_a_at	Npc2h	2	9.11595	9.56489	9.54522	9.80328	9.32542	9.81549	10.0051	9.37279	9.40043	9.65224	9.31349	10.0047	9.73159	9.67112	9.67098	10.0745	9.99698	9.88561	9.95506	10.2797	9.75788	9.83851	9.84632	10.5448	9.55726	9.57251	9.17484	8.96259	10.0752	9.546	9.54864	9.62379	9.4421	9.09476	8.91065	9.57601	0.00126604	0.0234213	0.361185	0.273571	0.372841	-0.152882	0.000584034	0.0142297	-0.514067
1624509_at	LvpL	2	9.19847	8.94259	8.53269	8.62023	9.08247	9.0676	9.18639	9.08755	8.84959	9.53913	9.42928	8.84845	8.47891	8.30112	8.15146	8.6498	7.63105	8.1061	8.53695	8.3208	8.46518	8.4713	8.18501	8.38536	8.95495	9.5684	9.16681	8.83515	8.35114	9.41019	9.42101	9.45644	9.14211	10.084	9.47326	9.81251	7.6e-05	0.00428658	-0.725116	0.0548851	0.208011	0.274298	5.12e-06	0.000890214	0.999415
1624776_a_at	mtacp1	2	11.6288	11.662	11.7042	11.6705	11.7647	11.7664	11.9723	11.7074	11.7107	11.8173	11.7912	11.8175	11.8739	11.7613	11.7492	11.6978	11.9198	11.9151	11.9804	11.7499	11.8717	12.086	11.8088	11.9518	11.8022	11.7355	11.7294	11.7511	11.8394	11.8078	11.7083	11.722	11.7649	11.8749	11.6252	11.8301	0.000978524	0.0198371	0.112749	0.669349	0.510515	0.0148482	0.00336778	0.0420592	-0.0979011
1624975_at	CG17028	2	7.35418	7.61685	7.29101	7.4057	7.22674	7.04336	7.60888	7.71903	7.01676	7.73201	7.41757	7.38147	7.76806	7.84506	7.91159	8.14327	7.87294	7.62088	8.15352	8.15415	7.64599	7.99757	8.02439	8.05178	7.2484	7.66299	7.4399	7.42039	7.52992	7.40763	7.80971	7.84163	7.49149	7.62443	7.81176	8.14741	1.95e-07	0.000152077	0.531305	0.0130898	0.0968882	0.218507	0.000277463	0.00917376	-0.312798
1625075_at	Nep2	2	8.43931	8.81486	8.69109	8.64222	8.04727	8.39496	8.08863	8.05804	7.86795	8.44328	8.45238	8.19686	8.9632	8.71827	8.9644	8.75676	8.45372	8.5192	8.50972	8.64825	8.47395	8.31609	8.56049	8.65663	8.42695	8.56663	8.20395	8.64917	8.11114	8.22049	8.38086	8.34668	7.87666	8.30716	8.07023	7.83657	0.00272935	0.0373061	0.283653	0.214985	0.348596	-0.095029	0.000415853	0.0116377	-0.378682
1625374_at	CG9466	2	6.35602	5.89748	5.9926	5.94458	6.71876	5.92687	6.05585	6.52938	6.18578	6.97789	6.1393	6.41803	7.3679	6.42538	6.89521	7.24664	6.63751	6.84307	6.48672	7.03858	6.90653	6.85882	7.76848	6.5469	6.09763	5.93921	5.94738	5.82326	6.74373	5.99816	5.97461	6.12142	6.16857	6.26005	6.95951	6.57719	0.00134107	0.0242171	0.656601	0.680985	0.513938	-0.0443167	0.000233916	0.00835699	-0.700918
1625538_at	Jon66Ci	2	9.36414	9.00944	8.93265	8.59893	9.67402	8.13384	10.5717	9.42752	9.43293	8.63481	8.5376	9.46965	9.86988	10.0812	8.94005	9.54016	10.445	9.6004	10.6807	9.47909	10.4556	10.4576	10.4194	10.3809	9.96885	8.31607	8.73773	8.69474	8.89103	9.38573	9.71864	8.9599	9.67238	9.10149	10.1473	9.86617	0.000579455	0.0142046	0.880216	0.5519	0.473103	0.139399	0.00106388	0.0210725	-0.740817
1625552_at	CG14820	2	8.06735	7.77481	7.55488	7.66108	7.94608	7.7974	8.67947	8.01925	8.06493	8.44162	7.89079	8.31255	8.65437	8.58006	8.27696	8.49465	8.64761	8.69658	8.9221	8.4877	8.84578	9.25578	9.02958	9.12947	8.09113	7.87274	7.81842	7.75094	8.06285	8.37132	8.00314	8.06708	8.1692	8.22956	8.4583	8.58979	2.14e-07	0.000152077	0.734203	0.291021	0.380056	0.106189	3.39e-07	0.00018095	-0.628014
1625587_at	Jheh3	2	9.53626	9.53426	9.96837	9.63839	9.8786	9.74197	10.1277	9.9591	9.8365	9.88702	9.9155	9.82833	10.0312	10.0948	10.3665	10.1598	10.0634	10.1065	10.1724	10.2131	10.1908	10.4418	10.3374	10.0324	9.71449	9.88329	9.61517	9.57378	9.81657	9.95018	9.92561	10.0154	10.0362	10.0461	10.0619	9.75984	9.31e-06	0.00116653	0.363196	0.446854	0.436782	0.0455515	7.77e-05	0.00435784	-0.317645
1625648_at	CG3868	2	13.3026	13.1512	12.9565	12.8583	13.171	12.9862	13.1156	13.2273	13.2788	13.1589	13.1149	12.9542	12.8765	13.0853	12.8284	12.7668	12.6458	12.6422	12.9954	12.6676	12.8739	12.9594	12.9636	12.7297	13.1418	13.0021	12.9842	12.9756	12.9017	13.1714	13.1113	13.0055	13.0441	12.9282	13.1516	13.0231	0.000227797	0.00819115	-0.270081	0.155577	0.317667	-0.0695788	0.00125977	0.023408	0.200502
1625671_at	lectin-37Db	2	10.308	10.2425	10.5674	11.2364	10.7372	11.0503	11.9408	11.256	11.051	10.6964	10.6683	11.8466	11.1166	10.8842	11.6174	11.3933	11.784	11.6927	11.9763	11.4117	11.7799	12.0736	11.7289	12.6444	11.3648	10.8619	10.943	10.2031	11.1818	11.2306	11.443	11.2848	11.1558	10.7534	11.7179	11.81	0.000100477	0.00501933	0.708529	0.275698	0.373805	0.19578	0.00327874	0.0413986	-0.512748
1625954_at	CG2681	2	7.54471	8.13341	8.16195	8.06589	8.00013	8.12595	7.99769	7.95215	7.85787	8.10167	8.02649	7.81556	7.78116	8.24498	8.58956	8.52562	8.13142	8.50059	8.32767	8.40148	8.36019	8.44511	8.50683	8.42519	7.52908	8.22845	7.94368	7.58552	8.01094	8.34408	7.93652	8.21259	8.12049	8.11985	8.29672	8.27585	3.43e-06	0.000723698	0.37136	0.369697	0.408965	0.0683583	0.00175517	0.0284714	-0.303002
1625975_at	Nha2	2	8.52107	8.87378	8.72228	9.06181	8.69742	9.22978	8.27847	8.50203	8.52348	8.41107	8.23715	8.4113	8.73587	9.0511	8.86015	9.14272	8.78827	9.06629	8.91098	9.02572	8.76693	8.70092	8.5163	8.79554	8.76564	8.77412	8.38895	8.40284	8.538	8.87881	8.77977	8.50802	8.4256	8.35633	8.54084	8.457	0.00217451	0.0324366	0.240928	0.560338	0.476222	-0.0544762	0.000708182	0.0161079	-0.295404
1625985_at	CG31446	2	8.80211	9.5394	8.92024	8.7688	9.08201	8.89694	9.60652	9.21991	8.88281	9.32013	8.91438	9.26444	9.67295	9.69031	9.97643	10.0447	9.60293	9.96291	10.427	10.3114	9.88384	10.3117	10.1686	10.6353	9.35449	8.98599	8.76825	8.57254	9.20745	9.49371	9.41937	9.12948	9.56929	9.21445	9.403	9.58965	9.57e-07	0.000348949	0.95587	0.301304	0.384462	0.124165	1.47e-05	0.00151814	-0.831705
1626093_at	Jon65Aiii	2	14.6302	14.6262	14.6498	14.5504	14.6855	14.5397	14.6004	14.6505	14.6312	14.6114	14.6328	14.5737	14.6422	14.7537	14.7644	14.7007	14.6541	14.651	14.7455	14.7017	14.7091	14.7022	14.7341	14.5338	14.5877	14.5139	14.5115	14.4586	14.6171	14.601	14.6184	14.6247	14.6124	14.5618	14.6677	14.6002	0.00189726	0.0296775	0.07588	0.084898	0.252248	-0.0339197	0.00228926	0.0335247	-0.1098
1626100_at	CG16723	2	7.52666	6.62483	5.22139	6.27429	6.79589	6.99217	6.18887	7.10279	6.49066	7.28486	7.09161	5.87148	5.03458	6.24589	5.2065	5.82508	5.35123	4.62766	5.59314	5.43008	4.52639	5.26456	5.31687	4.68627	6.89536	6.77337	6.54152	6.39904	5.90271	6.59007	6.7438	6.31582	6.22165	6.34442	6.10316	5.62501	0.000140969	0.00607665	-1.3631	0.236894	0.35921	-0.250798	1.03e-05	0.00125196	1.11231
1626113_at	CG4080	2	9.29544	9.18149	9.26781	9.18684	9.2435	9.3233	9.16384	9.16335	9.2406	9.11076	9.22843	9.4554	9.25259	9.13292	9.08443	8.93109	9.17872	8.94916	9.09542	9.03532	9.06832	9.07429	9.10095	9.21832	9.35806	9.06972	9.31514	9.2501	9.21152	9.11511	9.22279	9.32527	9.12819	9.2883	9.3763	9.29834	0.000544929	0.0135898	-0.144935	0.83188	0.559272	0.0081738	0.000827048	0.0178255	0.153108
1626222_at	Ser8	2	6.51421	7.20744	5.76284	6.37497	5.98784	7.16999	8.84902	6.48532	7.59887	7.27717	6.62721	7.93503	8.26895	7.58606	8.28359	7.81918	6.92344	8.77289	8.99925	7.4602	8.48352	8.35292	7.93473	9.08185	7.12263	7.81111	6.98312	6.46856	6.82598	7.1895	6.45947	7.33945	7.56565	7.55056	7.02734	8.31847	4.15e-05	0.00298409	1.18139	0.38082	0.413329	0.239329	0.00109779	0.0215203	-0.942061
1626394_at	Jon99Fi	2	12.4013	12.5397	12.1209	12.1226	12.643	11.6357	13.1017	12.7166	12.5695	12.2282	12.6994	12.7387	13.2321	12.6496	12.8836	12.5479	13.2229	13.0951	13.487	12.8022	13.1584	13.4535	13.3311	13.2776	12.9731	12.2574	12.467	12.6178	12.4325	12.7307	12.9724	12.2368	13.1132	13.0395	12.8186	12.8417	0.000195049	0.00748256	0.635318	0.0981542	0.268562	0.248636	0.000107987	0.00520342	-0.386682
1626455_s_at	CG34005	2	5.86951	5.51739	4.96343	6.06168	6.2617	6.27955	7.3676	6.56983	5.97411	6.31614	5.98944	7.03268	6.53959	6.89312	7.28299	7.37373	7.32241	7.55733	7.81504	7.29795	6.89698	7.45999	7.39583	8.32642	6.42745	5.85441	6.37742	5.69242	6.74754	6.82359	6.75419	6.71719	6.58347	6.32258	7.02424	7.08672	3.91e-06	0.000768684	1.16319	0.0531452	0.204631	0.35068	6.06e-05	0.00376883	-0.812513
1626482_a_at	CG11227	2	4.45907	4.93581	4.80827	4.70779	4.68638	4.47243	4.9131	5.03657	4.84773	5.00403	4.89528	4.45907	4.18985	4.32834	3.96278	3.75881	3.94318	4.05531	4.40643	4.18634	4.05239	4.04062	4.26026	3.74304	4.80515	4.79328	4.6818	4.42153	4.51577	4.45881	4.65419	4.78268	4.70858	4.20539	4.80724	4.20944	2.31e-07	0.000154299	-0.691515	0.0324932	0.158904	-0.181805	4.86e-07	0.000221481	0.50971
1626508_at	CG32428	2	10.408	10.3053	10.2215	10.2439	10.3485	10.1973	10.2432	10.2581	10.3264	10.1542	10.3352	10.3495	10.2107	10.1683	10.1049	9.99592	10.3429	10.0218	10.1365	10.0005	10.1008	10.0872	10.1227	9.9131	10.2868	10.3025	10.3241	10.398	10.313	10.2719	10.2404	10.2784	10.2904	10.2985	10.2901	10.0995	0.000135797	0.00591734	-0.182136	0.994709	0.600835	0.000223154	0.000114815	0.00541507	0.182359
1626527_at	hh	2	5.29188	5.17124	4.84149	5.68332	5.2585	5.42738	5.44513	5.5404	4.77033	5.50129	5.26313	5.72339	5.87111	5.69005	6.27917	5.22124	6.06338	5.64257	6.194	5.47024	5.51876	6.30185	5.90722	6.87007	5.32335	5.86348	5.55209	5.10572	5.4736	5.30203	5.4227	5.42171	5.3101	5.51731	5.43277	5.60983	0.0019951	0.0305271	0.592682	0.300735	0.384289	0.118099	0.00154056	0.0263366	-0.474582
1626645_at	CG8596	2	8.172	8.36283	8.30208	8.21414	8.03786	8.49127	8.32832	8.22245	7.97257	8.10479	7.93879	8.54626	8.35445	8.39895	8.40349	8.47211	8.3996	8.39217	8.4809	8.39938	8.30877	8.24862	8.30766	8.99439	8.33323	8.19069	8.12	8.02899	8.16344	8.12628	8.4995	8.24083	8.14466	7.98286	8.46264	8.59034	0.000836579	0.0180067	0.205592	0.821388	0.556704	0.0158405	0.00283051	0.0379822	-0.189752
1626700_at	Act88F	2	11.403	10.776	11.5767	10.6664	10.4253	11.1569	10.0574	10.3307	9.82838	9.39349	11.1783	11.0992	10.0284	10.2189	10.5091	10.0492	9.04795	10.3344	10.1601	10.2826	9.33141	9.27232	9.76931	9.86558	10.8175	12.0399	10.5186	10.0643	11.312	11.5999	11.6992	10.4386	11.1738	10.7433	11.1614	9.67191	0.000589033	0.014268	-0.751883	0.371595	0.410042	0.279058	0.00141145	0.0249541	1.03094
1626740_at	Cpr72Ec	2	8.08196	7.85875	7.31898	6.91676	6.17637	7.48872	7.58147	6.99245	6.70388	7.48952	6.32726	8.12147	7.82394	8.54738	7.95225	7.55025	6.32664	7.91214	8.8198	7.67491	6.61697	8.46847	7.27403	8.95183	7.90696	8.02481	6.92817	5.67969	6.30439	6.93224	8.52734	6.77547	6.46043	8.11866	6.4714	8.63284	0.000968968	0.0197182	0.571752	0.886448	0.57418	-0.0245979	0.00311659	0.0400449	-0.59635
1626764_at	CG10182	2	9.83733	9.36638	9.12933	9.34609	10.0794	9.71325	9.49431	9.84783	9.66997	9.77346	9.89433	9.55392	9.03765	9.42426	8.65768	9.19141	8.9892	8.66578	9.26011	9.20609	8.49803	8.91904	9.22894	8.60016	9.61153	9.12831	9.32557	9.77864	9.2301	9.80092	9.89583	10.0623	9.70026	9.72211	9.67311	9.51868	0.000111389	0.00529956	-0.668941	0.83335	0.559738	-0.0215276	0.000171523	0.0069456	0.647413
1627004_at	CG7632	2	9.2886	9.24663	9.57783	9.47313	9.15517	9.34603	9.11446	9.29255	9.13093	9.01893	9.16234	9.35822	9.10119	9.06293	9.15286	8.96911	9.01849	9.22847	9.03574	9.17083	8.95495	8.95015	8.95337	9.10959	9.09735	9.55993	9.22985	9.28837	9.35025	9.29859	9.35575	9.18134	9.08306	9.12067	9.11719	9.08495	0.000242393	0.00856039	-0.204764	0.592606	0.486447	-0.0331281	0.00381799	0.0456551	0.171635
1627180_at	Cyp4d14	2	7.77966	7.30213	7.85472	7.57382	8.03642	7.77317	8.2425	8.23335	8.61023	8.36464	8.21469	7.84943	6.7105	6.86175	7.19471	7.576	6.99278	7.13485	7.18449	7.43964	7.47089	7.48916	7.62475	7.34197	7.78013	8.04981	7.43009	7.32265	7.6309	8.22284	7.85706	7.85668	7.9089	7.80637	7.40105	7.88429	9.94e-06	0.00122635	-0.734439	0.120124	0.289924	-0.223667	0.00299826	0.0391594	0.510772
1627287_at	CG5966	2	10.7646	10.5046	10.6764	11.2291	11.1853	11.12	10.3161	10.6939	10.2631	9.99137	10.6485	10.6179	10.3966	9.79347	9.57527	9.42012	9.93557	9.91727	9.79	9.82486	9.51001	9.43631	9.28999	9.29695	10.856	10.845	11.0085	10.0263	10.3217	10.469	10.3241	9.88933	10.3204	10.229	9.99135	9.57605	6.2e-06	0.00095296	-0.985365	0.0611369	0.21752	-0.346163	7.37e-05	0.00423393	0.639202
1627463_at	Damm	2	10.1082	10.1105	10.0957	10.4598	10.4189	10.8693	11.0221	10.857	10.6402	10.3758	10.2999	11.0788	10.9525	11.0746	10.6859	10.6838	11.0484	11.0172	11.2932	10.6156	10.9672	11.0661	10.9	11.3011	10.7231	10.2794	10.5949	10.1581	10.6299	10.3664	10.505	10.4584	10.6967	10.351	10.6551	11.1707	0.000936463	0.0193223	0.439099	0.852278	0.564598	0.0210135	0.000202529	0.00767767	-0.418085
1627507_at	CG5704	2	8.30676	8.07792	8.40309	8.51756	8.5468	8.43839	8.46189	8.58621	8.60274	8.57246	8.57882	8.54974	8.38706	8.23416	8.15858	8.26436	8.25397	8.18857	8.25663	8.41959	8.18911	8.11395	8.43655	8.25789	8.61795	8.63902	8.51999	8.58651	8.38632	8.34699	8.45273	8.41143	8.34939	8.20545	8.27076	8.44813	0.00195302	0.0300843	-0.206829	0.668077	0.51019	-0.0339749	0.00290187	0.0384571	0.172854
1627552_at	---	2	11.0752	11.4773	11.1603	11.6281	11.2043	11.4862	11.5867	11.5974	10.97	11.5403	10.9513	11.6152	12.2801	12.7404	12.4704	12.4287	12.1492	12.7342	12.6045	12.6694	12.4597	12.4313	12.6904	12.1644	11.7014	11.249	11.2499	10.5835	11.7961	11.6092	11.7338	11.8974	11.8258	11.9748	11.9453	12.2952	9.62e-08	0.000102817	1.12755	0.0879512	0.256184	0.297429	0.000214426	0.0078863	-0.830119
1627595_at	Npc2g	2	11.3521	11.8159	11.7804	12.1012	11.7907	12.0393	11.718	11.6379	11.751	11.7519	11.4526	11.7348	11.9165	11.9252	11.9553	12.293	12.0265	12.3303	11.9924	12.2472	11.9634	11.8861	12.0227	12.0793	11.8043	11.8196	11.7146	11.7004	12.1501	11.8207	11.5816	11.8644	11.7878	11.4978	11.6063	11.8255	8.12e-05	0.00446656	0.309335	0.783856	0.545909	0.0206006	0.000409592	0.0115675	-0.288734
1627643_at	CG7546 /// Mgstl	2	8.95051	9.30515	9.27527	9.25631	9.00685	9.38146	9.09646	9.00033	8.93192	9.15383	8.82284	8.87795	9.24415	9.35413	9.40922	9.79558	8.98357	9.85415	9.63731	9.61334	9.55764	9.60028	9.35423	9.46689	9.19425	9.30818	8.72201	8.60939	8.97792	9.13057	9.02272	9.09889	9.12892	9.00273	9.05085	9.58214	8.35e-05	0.00452218	0.400967	0.858877	0.566621	-0.0191957	0.00273127	0.0373061	-0.420163
1627869_at	Jon25Bi	2	10.2499	10.5323	10.5486	9.33091	10.8822	9.74302	10.0194	10.5287	10.1774	9.42208	10.4071	9.99265	11.648	10.9355	10.7866	11.0016	10.8423	10.4532	11.2332	10.8159	10.3752	11.1543	11.086	9.94899	10.0506	10.0122	8.99846	9.26234	10.2001	9.79678	9.52338	10.5281	9.77945	9.80782	10.6472	10.061	0.00306316	0.03967	0.703857	0.10604	0.276625	-0.263911	0.000304453	0.00968665	-0.967768
1627994_at	CG33296	2	5.9898	7.15878	7.03035	6.20577	6.51657	6.87195	6.51369	5.99321	6.27725	6.02864	6.23463	5.688	6.87767	6.70347	7.17606	7.69822	6.86933	7.62144	6.9186	8.00367	6.60577	7.0799	6.74301	7.75999	6.13081	6.54633	6.21245	5.59637	6.56734	6.68926	6.51044	6.28239	6.29424	6.06226	5.90564	5.24872	0.00387907	0.0460545	0.795708	0.0675528	0.228677	-0.2052	0.00071431	0.0161626	-1.00091
1628261_at	CG13067	2	7.86107	7.81426	8.31223	8.04594	7.82544	7.91972	7.898	8.15571	7.67935	8.04614	7.90154	7.71021	8.1626	8.57513	8.69293	8.51761	8.83785	8.23778	8.93577	8.74051	8.30489	8.52059	8.67053	8.57633	7.9678	8.32155	8.09552	8.44684	7.83054	7.99343	7.97192	8.05247	7.89629	7.90856	7.86041	7.99358	3.42e-06	0.000723698	0.633576	0.153076	0.315508	0.0974411	8.05e-05	0.00445207	-0.536135
1628272_a_at	CG12466 /// CG40486	2	8.20537	8.50754	8.26209	8.50556	8.26764	8.54227	8.25056	8.22303	8.3132	8.10963	8.22308	7.67738	8.67657	8.73783	8.73762	9.0846	8.95969	9.06216	8.66087	8.88128	9.01625	8.68224	8.59877	8.52058	8.40784	8.59788	7.88524	8.12433	8.40929	8.64122	8.11267	8.29036	8.36386	7.9635	8.13469	8.29765	2.18e-07	0.000152077	0.544259	0.88295	0.573266	0.0117656	1.28e-05	0.00142843	-0.532494
1628364_at	CG7968	2	11.9994	11.8629	11.4492	11.7545	12.0615	11.9712	12.1994	12.121	12.1194	12.2584	11.9638	11.9654	11.4113	11.4899	11.5794	11.6684	11.3091	11.5968	12.0179	11.5535	11.675	11.6663	11.5765	11.4885	11.8852	11.8318	12.027	11.8266	11.8724	12.3475	12.2095	12.3282	12.2606	12.2732	12.2217	12.442	0.000178044	0.00708445	-0.391124	0.0507347	0.200179	0.149963	6.74e-06	0.0010012	0.541087
1628376_x_at	CG13947	2	10.3162	11.4766	11.6273	10.2178	11.15	10.9692	10.2164	11.0532	10.1114	10.2401	9.88137	9.50607	11.9245	11.7948	12.407	12.5395	12.0938	12.9806	12.7999	12.5401	12.7953	11.7027	12.2164	11.5876	10.662	10.0025	10.4773	10.0785	11.4472	11.6482	11.1174	11.4528	12.0134	11.4749	11.3924	11.8511	7.21e-06	0.00104927	1.71804	0.109187	0.27936	0.571013	0.000293335	0.00945008	-1.14703
1628610_at	baf	2	11.0619	10.8842	10.9814	11.0242	11.0648	11.049	11.1414	10.9712	11.0417	11.0285	11.0985	11.144	10.9849	10.8182	10.8665	10.9513	11.1388	10.9044	11.0163	10.8274	10.8698	11.0205	10.9536	11.0614	10.9845	11.0175	11.1849	11.1955	11.1738	11.0037	10.9706	10.9615	11.0471	11.0769	11.0276	11.1181	0.000875886	0.018505	-0.0897925	0.501922	0.455087	0.0225813	0.00367614	0.0444897	0.112374
1628611_at	CG11241	2	7.70046	7.90172	7.67767	7.55053	7.48006	8.04835	7.24014	7.40354	7.84614	7.56602	7.5065	7.2242	7.79101	7.95727	7.93649	8.06593	7.75237	8.45694	7.84486	7.99915	8.31775	7.93571	7.89952	7.7092	7.55953	7.65526	7.60367	7.67067	7.86154	8.32327	7.47967	7.93589	8.13334	7.82273	7.7102	7.64014	1.53e-05	0.0015474	0.376739	0.0180824	0.115293	0.187548	0.000951973	0.019496	-0.189191
1628800_at	Jon65Aiv	2	14.5844	14.5378	14.5932	14.5052	14.6669	14.4547	14.6021	14.5956	14.5281	14.5152	14.591	14.4033	14.6491	14.7304	14.7153	14.5157	14.6068	14.5847	14.7109	14.6477	14.5475	14.6711	14.6791	14.5029	14.6133	14.4456	14.461	14.4833	14.6201	14.5789	14.5827	14.4789	14.5427	14.4209	14.5432	14.3873	0.00179805	0.0288234	0.0819732	0.117267	0.286944	-0.0349566	0.00283851	0.0380259	-0.11693
1628950_at	CG10178	2	8.26394	8.69287	8.84517	8.73882	8.23602	8.54694	8.27507	8.45988	8.72255	7.95803	8.28025	8.36837	8.24462	8.74966	8.79511	8.90196	8.69782	8.70004	8.23966	8.73106	8.87323	8.30217	8.55925	8.68462	8.35313	8.36381	8.39205	8.46639	8.40218	8.5982	8.07766	8.49985	8.51833	8.08452	8.5304	8.23559	0.00373287	0.0450403	0.174274	0.28415	0.377631	-0.0721508	0.000491433	0.0128136	-0.246425
1629042_at	CG15674	2	7.56916	7.47902	7.3731	7.57673	7.77746	7.7148	7.80099	7.84402	7.99122	7.64008	7.82466	7.58966	7.26673	7.48416	7.16842	7.54893	7.31534	7.43728	7.54741	7.33333	7.57451	7.4402	7.4302	7.4631	7.779	7.50934	7.71277	7.68728	7.50947	7.8645	7.62206	7.6708	7.84758	7.5113	7.83261	7.50261	0.00016721	0.00684005	-0.264274	0.84017	0.561853	-0.0109657	0.000702309	0.0160884	0.253308
1629150_at	---	2	11.8252	11.5634	11.3396	11.4144	11.8089	11.4289	11.6755	11.7374	11.8467	11.7987	11.8461	11.5512	11.3683	11.4615	11.3037	11.3515	11.5324	11.3038	11.4647	11.2357	11.4817	11.5226	11.5073	11.3002	11.5645	11.45	11.6533	11.6665	11.5591	11.6742	11.5163	11.7033	11.7053	11.7072	11.6402	11.2936	0.00012532	0.00562906	-0.250239	0.356057	0.404683	-0.058561	0.00158713	0.0268339	0.191678
1629194_s_at	ade2	2	10.2087	10.6816	10.5942	10.2711	10.3694	10.1885	10.2723	10.4714	10.3128	10.1927	10.3421	10.2441	10.1129	10.2472	10.2658	10.2149	10.0149	10.105	9.97347	10.1841	10.0661	10.1887	10.2536	10.1233	10.2989	10.4443	10.3297	10.1994	10.4288	10.1902	10.1762	10.3479	10.1537	10.2246	10.3117	10.1352	0.000450437	0.0121599	-0.19991	0.0390346	0.175235	-0.0756996	0.00371996	0.0449183	0.12421
1629199_at	Ag5r2	2	11.0271	11.1768	10.0699	10.2969	11.2041	10.4153	11.4719	11.2438	11.3669	11.1742	11.177	11.0941	11.9872	12.1619	11.8899	12.0137	12.2461	11.9894	12.5191	11.9176	12.3719	11.9945	12.4137	11.9904	11.3509	10.7671	11.0749	11.0519	11.0408	11.4236	11.3273	11.8696	11.905	11.8431	11.9993	11.7428	3.1e-07	0.00017486	1.14813	0.00524581	0.0556713	0.47321	0.000253515	0.00874247	-0.67492
1629235_s_at	wupA	2	12.538	12.9815	12.9547	12.8737	12.6026	12.7804	12.4333	12.4828	12.2859	12.4603	12.5298	12.5498	12.9904	12.8473	13.06	13.0133	12.792	13.0467	12.8112	13.0502	12.7096	12.7646	12.8222	12.7969	12.6799	13.0053	12.3879	12.4	12.8377	12.747	12.7887	12.7178	12.4715	12.5416	12.4957	12.5448	0.000363456	0.0107104	0.269311	0.88261	0.573186	0.0120899	0.00344661	0.0427111	-0.257221
1629313_at	CG8661	2	10.0952	11.2394	10.1986	10.2142	10.5972	10.52	10.7102	10.4763	10.593	10.9712	10.6304	10.79	11.1217	11.5186	11.1927	11.4783	11.0615	11.5789	11.7323	11.6558	11.6199	11.7154	11.3745	11.4153	10.9366	10.401	10.5434	10.1637	10.3379	11.1855	10.668	10.6872	11.1313	11.1769	10.855	10.9359	6.77e-07	0.000264951	0.869084	0.222469	0.352385	0.165552	1.82e-05	0.00173982	-0.703532
1629331_at	CG31468 /// DsimGD18362	2	6.01507	5.98941	5.2349	5.60559	6.28282	6.65406	5.69392	6.05618	5.88515	6.30502	5.52333	5.66688	4.63607	5.59802	4.74512	5.58121	5.00385	5.59102	5.76495	5.42001	5.08671	4.73686	4.91816	5.39969	6.20233	5.74345	6.85466	6.02656	6.31159	5.98093	6.67607	6.32984	6.25732	5.86449	5.59941	6.12496	0.000767786	0.0170288	-0.702555	0.178712	0.330718	0.25494	7.96e-05	0.0044154	0.957495
1629367_at	CG15534	2	8.23123	8.78474	6.98593	8.71454	9.52316	8.985	8.67466	8.47518	8.90236	8.92158	8.94341	8.49728	7.47126	7.3699	7.56529	7.8809	7.23412	8.03665	7.96538	8.0177	7.85173	8.09091	7.58294	7.0198	8.60022	7.50811	8.67307	8.5861	8.53072	8.90725	9.25133	8.83771	8.58209	8.04242	8.54079	9.15519	0.000498107	0.0129037	-0.962707	0.885118	0.573828	-0.0353402	0.000135266	0.00591026	0.927367
1629395_at	CG9743	2	11.8534	11.7256	11.4753	11.6361	12.1223	12.0581	11.8821	12.035	11.9016	11.9015	11.9824	11.9389	11.2162	11.9364	11.2533	11.5997	11.4422	11.3442	11.6193	11.5714	11.427	11.5485	11.7379	11.7524	11.8337	11.6057	11.9421	11.6176	11.6178	11.9435	12.0504	12.1188	11.9793	11.8523	12.1146	11.9277	0.00129377	0.0236559	-0.338639	0.909158	0.580278	0.0076137	0.00196629	0.0302596	0.346252
1629520_at	CG8997 /// DsimCG8997	2	14.4699	14.4393	14.2139	14.3195	14.5225	14.4205	14.5203	14.5153	14.539	14.5675	14.5447	14.4138	14.1506	14.1877	14.145	14.2242	13.9495	14.1612	14.3932	14.1193	14.2333	14.1439	14.2236	14.0064	14.4748	14.4563	14.5665	14.3996	14.4579	14.5055	14.5337	14.5435	14.5304	14.5507	14.4762	14.4376	2.49e-05	0.00215678	-0.295705	0.26494	0.36983	0.0372005	5.13e-07	0.00022232	0.332906
1629558_at	CG15657	2	6.20606	7.0992	7.44225	7.0924	6.20458	6.79534	6.07418	6.27661	6.85936	6.38681	6.16499	7.07314	7.29771	7.36005	7.70453	7.62259	6.74377	7.90037	7.47249	7.70312	7.3793	7.31655	7.34968	7.77992	6.4871	7.55312	6.57833	6.02472	6.78039	6.03528	7.00626	6.6647	6.62109	6.11964	6.70548	6.78275	2.48e-05	0.00215678	0.829598	0.890314	0.575161	-0.0263362	0.000422774	0.0116685	-0.855935
1629685_at	CG16986	2	10.3281	10.3489	10.8678	10.9643	10.6152	10.768	11.3494	11.0437	10.6934	11.1685	10.6796	11.2113	11.0545	10.8736	11.4745	11.1659	11.4088	11.3715	11.7849	11.2945	11.3883	11.641	11.2755	11.9326	11.2686	10.858	10.8356	10.559	11.2078	10.6704	11.0122	11.0243	10.7711	11.0594	10.9974	11.7152	5.51e-07	0.000232423	0.552267	0.198395	0.340472	0.161722	0.00105654	0.0210612	-0.390545
1629726_at	CG10472	2	13.6085	13.4826	12.8389	12.8189	13.4374	12.6192	13.8737	13.6078	13.6346	13.7425	13.6434	13.6814	13.8984	13.7978	13.8535	13.8214	13.7767	13.7063	14.151	13.6385	13.932	14.068	14.0678	13.9865	13.6291	13.4661	13.5301	13.578	13.3341	13.6856	13.7602	13.7846	13.8001	13.8768	13.9078	14.0202	0.000634784	0.0149692	0.475759	0.0235951	0.133474	0.281985	0.00304464	0.0394684	-0.193774
1629919_at	Cpr100A	2	5.46375	5.42583	5.72835	6.00021	5.49298	6.1138	4.99824	5.3114	5.10591	5.6458	5.09112	5.43176	5.84229	5.77751	6.53881	6.44898	5.47611	7.15036	6.9025	6.60071	5.68733	6.3264	5.77917	6.22541	5.28483	5.21628	5.08554	4.7388	5.28745	5.3265	5.28564	5.49788	5.42408	5.65148	5.37283	5.6696	0.000298793	0.0095826	0.745534	0.281941	0.376947	-0.16402	0.000262784	0.00889004	-0.909555
1629934_at	CG14219	2	10.0095	9.44328	8.54686	9.2418	9.95989	10.2908	9.05604	10.0196	9.72996	9.73528	9.77993	9.56339	7.90082	9.1895	8.37496	8.52366	8.17842	7.84814	8.18142	7.69463	7.3932	7.67744	8.58012	7.74634	9.38065	9.2209	9.39076	9.79979	8.8228	9.92328	9.78235	9.96331	9.24678	9.14353	9.23211	9.15824	5.78e-05	0.00363568	-1.50731	0.293729	0.380706	-0.192654	2.04e-05	0.00190889	1.31465
1630112_at	CG18731	2	8.71139	8.73517	8.81296	8.8582	8.66144	8.78429	8.60012	8.63402	8.59353	8.6083	8.47939	8.55869	8.90178	8.76867	8.85206	8.96764	8.78444	8.96373	8.90127	8.9005	8.81501	8.80001	8.79313	8.94553	8.63374	8.86827	8.61769	8.65403	8.8235	8.75858	8.61026	8.57103	8.73266	8.64416	8.50234	8.99114	6.44e-05	0.00388151	0.196356	0.550931	0.472826	0.0308232	0.00335797	0.0420349	-0.165532
1630156_at	CG12859	2	11.3485	11.5351	11.4728	11.4203	11.4401	11.5428	11.5921	11.3097	11.5071	11.5754	11.3228	11.3873	11.502	11.4403	11.4269	11.5616	11.5329	11.7152	11.7646	11.5621	11.566	11.6928	11.4802	11.5502	11.5124	11.4608	11.2629	11.351	11.5567	11.4471	11.3742	11.3999	11.4717	11.5128	11.2052	11.5092	0.00223815	0.0330364	0.111743	0.398577	0.420044	-0.0325061	0.00303155	0.0393677	-0.144249
1630249_at	CG42235	2	7.04357	7.49848	7.54167	7.58667	7.04712	7.30075	7.16055	7.17925	6.8033	7.39632	7.14338	7.08773	7.49586	7.48259	7.58467	7.82428	7.11052	7.65264	7.70662	7.70165	7.21185	7.48767	7.30856	7.5281	7.26279	7.39583	6.90775	6.9165	7.40344	7.19312	7.51448	7.24469	6.93487	7.14008	7.08307	7.23312	0.000617957	0.0147679	0.27552	0.642729	0.502538	-0.0465871	0.00324551	0.0411086	-0.322107
1630260_at	CG31832	2	6.99558	6.75229	7.02121	7.27653	7.33771	7.37213	7.22404	7.29712	7.20601	7.57935	6.77253	7.1057	7.57069	6.71382	7.36754	7.81269	7.56714	7.68803	7.88927	7.63263	7.69649	7.93897	7.3813	8.04466	6.92885	7.13038	6.33622	7.27395	7.85259	7.29343	6.7331	6.73207	6.96127	6.13682	6.51687	7.15898	6.16e-05	0.00377014	0.446921	0.136807	0.30431	-0.240471	0.00222801	0.0329846	-0.687392
1630419_a_at	CG7300	2	7.59675	8.24004	7.96446	7.44042	7.34303	8.06221	7.18384	7.16625	6.74736	7.30472	6.97025	7.11223	8.53512	7.87828	8.25949	8.11445	8.03573	8.18151	8.44316	8.03285	8.0895	7.5763	8.16541	7.89576	8.0161	8.11411	6.88568	7.18684	7.22621	7.86236	8.08749	7.44344	7.18295	7.26541	6.98115	7.12656	0.000806871	0.0174846	0.672999	0.885137	0.573828	0.020563	0.000312189	0.0097625	-0.652436
1630506_at	CG3077	2	8.19583	8.07643	8.2761	8.28138	7.92939	8.1648	7.72793	8.13674	7.95041	7.74822	7.96021	8.31391	8.09614	7.97573	8.07405	7.82402	7.94142	7.81846	7.73092	7.67058	7.89542	7.56743	7.87798	7.90988	8.13624	8.05409	8.05609	8.35604	8.16548	8.15822	8.04877	7.96761	7.97236	8.0376	8.0526	8.03423	0.00248288	0.0353905	-0.198276	0.685626	0.515345	0.0231645	0.00101933	0.0204318	0.22144
1630520_s_at	---	2	8.64751	9.29016	8.71835	9.12651	8.40234	9.28222	8.54299	8.30219	8.14593	8.7069	7.72336	8.38284	9.4303	9.47676	9.44761	9.97109	8.67957	10.0136	9.66443	10.0124	9.32277	9.24643	9.01153	9.55024	9.30484	9.08771	8.60316	7.88681	9.00707	9.06044	8.80165	8.5917	9.04583	8.50182	8.43671	9.12488	2.35e-05	0.00209415	0.879625	0.324698	0.39313	0.181776	0.00262737	0.0365045	-0.697849
1630600_at	Fst /// Scm	2	11.1228	10.7017	11.217	11.433	12.4246	12.9513	10.4883	11.6278	11.5951	10.4974	10.8673	11.5867	10.1845	10.564	10.1939	10.4594	10.4803	10.7568	10.1213	10.2743	10.0431	9.67244	10.0627	10.1864	11.1562	10.9475	11.6021	11.2434	10.481	10.8124	11.1687	11.1342	11.4478	10.4111	11.2828	10.8357	4.3e-05	0.00302176	-1.12614	0.222848	0.352613	-0.33251	0.000105056	0.00513604	0.793633
1630611_at	CG7181 /// DmauCG7181 /// DsimCG7181	2	13.2939	13.2404	13.3299	13.2627	13.2347	13.2556	13.4107	13.2323	13.3515	13.3639	13.2559	13.3095	13.4062	13.3401	13.3563	13.3329	13.3832	13.4692	13.5244	13.3809	13.4757	13.5414	13.3567	13.4511	13.301	13.3065	13.1942	13.2568	13.368	13.3944	13.2821	13.194	13.2818	13.414	13.1617	13.4548	2.78e-06	0.000667829	0.123092	0.85056	0.564272	0.00568914	0.000349053	0.0104038	-0.117403
1630723_a_at	CG8708 /// DsimCG8708	2	7.26763	7.81678	7.65134	7.17276	6.99175	7.44932	7.42352	7.01335	6.61657	7.46806	6.57711	7.14852	8.12317	8.01643	8.49533	8.52339	7.26568	8.59362	8.34491	8.35853	7.94258	7.83698	7.93615	8.54063	7.67648	7.43271	6.98607	6.40047	7.92379	7.93822	7.78196	7.39282	7.54507	7.23909	7.2291	7.73614	1.57e-05	0.0015474	0.948391	0.215022	0.348599	0.223768	0.00294098	0.038743	-0.724623
1631098_at	CG7194	2	9.52191	9.35449	8.95157	9.37062	9.44756	9.36002	9.8778	9.7689	9.5955	9.57068	9.20791	9.62328	9.60296	9.96293	9.72208	9.7575	9.61091	9.6511	10.075	9.52172	9.90489	10.1279	9.93417	9.94423	9.45089	9.29973	9.44893	9.22246	9.29049	9.50855	9.18523	9.63966	9.43025	9.38015	9.70757	9.71311	0.00161115	0.0269418	0.347097	0.743087	0.533081	-0.0311037	0.000875798	0.018505	-0.378201
1631104_s_at	Fsh	2	6.27287	7.05743	7.04321	6.72731	6.62075	6.34398	6.26734	6.4949	6.30996	6.45434	6.53898	6.19954	6.33508	6.99758	7.04688	7.11119	7.09618	6.84729	6.74481	6.93178	6.64818	6.78125	6.7573	6.69661	6.25552	6.70878	6.42852	6.35541	6.48598	6.41932	6.54662	6.44078	6.56138	6.45259	6.68448	6.63396	0.000283171	0.00928589	0.305292	0.739418	0.531884	-0.0297712	0.000599372	0.0144313	-0.335064
1631196_at	MED10	2	10.5091	10.5839	10.5538	10.598	10.494	10.5506	10.5996	10.5407	10.4618	10.5471	10.4079	10.502	10.5549	10.5852	10.5937	10.6032	10.5589	10.7577	10.7171	10.7056	10.5629	10.5865	10.5461	10.6855	10.5418	10.6031	10.5823	10.5453	10.5793	10.5395	10.5355	10.4464	10.4685	10.3347	10.3847	10.4305	0.000800088	0.0174102	0.0923922	0.208901	0.345609	-0.0297606	0.00295273	0.0387891	-0.122153
1631204_at	Peritrophin-15b	2	7.97439	8.47661	8.3771	8.63731	7.94907	8.34115	8.79411	8.40073	8.40297	8.33665	8.33191	8.74398	8.5598	9.10151	8.83982	9.14577	8.53083	8.90351	9.26042	9.15341	8.77118	9.01965	8.9494	9.09847	8.74258	8.27341	8.31923	7.70785	8.29612	8.35469	8.0188	8.21686	8.68318	8.24002	8.53418	8.97395	6.7e-09	3.45e-05	0.547317	0.807789	0.552994	-0.0337584	0.00160907	0.0269418	-0.581075
1631474_s_at	Gpo-1	2	9.55611	10.0524	10.4964	10.0717	9.71371	9.93727	9.75032	10.0682	9.67244	9.37064	9.74088	9.48653	9.63833	10.3942	10.3574	10.3608	9.95274	10.1788	10.0128	10.3859	10.0797	9.7937	10.0992	9.92859	9.55638	10.1367	9.61123	9.51897	9.90354	9.94158	9.8918	9.87591	9.65196	9.6827	9.81883	9.76752	0.000121534	0.00553089	0.272124	0.653308	0.505532	-0.0466198	0.00143187	0.0251701	-0.318744
1631639_at	TpnC47D	2	7.52032	7.71423	8.05712	7.60289	7.47146	7.64544	7.76994	7.53937	7.43614	7.76136	7.884	7.28847	8.06144	7.91424	8.24002	7.8593	8.20807	7.8246	8.44508	8.05429	7.8085	7.97218	7.96596	8.42883	7.65303	7.62585	7.62019	7.81064	7.41432	7.63486	7.4804	7.65099	7.58308	7.84432	7.48575	7.8528	0.000608607	0.0146098	0.424315	0.972302	0.596135	-0.00287469	0.000226962	0.00819115	-0.42719
1631701_a_at	Cpr49Ac	2	6.76487	6.49195	7.17068	8.31571	7.8303	7.45894	7.27586	7.90873	7.143	7.59786	6.95961	7.50805	6.05654	6.29939	5.74031	6.14463	5.79046	6.00413	6.16551	7.25172	5.14055	5.62747	5.43368	6.5433	6.88394	7.60212	7.17433	7.04493	7.9425	7.21568	7.24942	7.53499	7.41587	6.80928	7.58126	7.85298	1.42e-05	0.00149479	-1.35232	0.957309	0.592289	-0.0098544	7.98e-06	0.00106591	1.34247
1631715_at	CG14872	2	7.46297	6.11614	6.52655	7.03955	6.74599	7.24177	8.67582	7.87293	7.69817	7.7062	7.38187	7.97711	7.62498	8.45124	8.02358	7.52875	8.9454	7.89874	8.52517	7.86941	8.39767	8.54608	8.55613	9.30951	7.28564	7.24635	7.75153	7.41295	8.1983	7.3463	7.54546	8.24762	7.49033	7.48319	8.46006	8.95245	0.00195106	0.0300843	0.935964	0.0913755	0.2599	0.414592	0.00280268	0.0378304	-0.521373
1631806_at	CG8693 /// DsimCG8693	2	11.027	10.4264	10.311	10.5475	10.9109	11.0137	10.7352	10.9347	10.7056	10.8472	10.9809	10.7003	9.47291	9.96602	9.51313	10.0826	9.2546	9.65216	9.89918	9.58054	9.90963	9.86342	9.34978	9.93327	10.6066	11.0664	10.7655	10.548	9.9074	10.8572	11.0312	10.9574	10.4201	11.1104	10.8015	10.7145	4.23e-06	0.000795137	-1.05526	0.818672	0.555981	-0.0295124	4.26e-07	0.000206761	1.02574
1631867_at	Idgf5	2	8.73408	8.85047	8.64209	8.91726	8.78405	9.29134	8.53655	8.39897	8.48461	8.35358	7.70336	8.40844	8.7142	8.74426	9.15633	9.30852	8.99804	9.34524	8.97668	9.36822	9.05269	8.79656	8.9193	9.07777	8.4515	9.09766	8.53078	8.10651	8.66496	8.9415	8.78071	8.8054	8.68185	8.63449	8.69147	8.26118	0.0022053	0.0328349	0.446083	0.736086	0.531018	0.0452677	0.00399178	0.0469972	-0.400815
1632152_at	CG10992	2	13.5663	13.5107	13.4325	13.5462	13.5799	13.6347	13.5667	13.609	13.5584	13.5401	13.5367	13.5697	13.2909	13.4683	13.4557	13.4796	13.4369	13.4875	13.4061	13.4741	13.4684	13.4165	13.3972	13.4576	13.5558	13.5127	13.5837	13.481	13.5106	13.6152	13.5393	13.5538	13.5607	13.4924	13.415	13.431	0.000157093	0.00662886	-0.117658	0.144045	0.309589	-0.0333157	0.00282566	0.0379807	0.0843419
1632228_at	CG6733	2	8.85562	9.234	8.99903	8.69819	9.06762	9.18255	9.20243	8.96951	8.74072	9.33304	8.77705	9.00149	9.2099	9.1998	9.57032	9.57392	9.64181	9.22393	9.31651	9.36947	9.44065	9.42444	9.12702	9.79892	9.3836	9.17676	8.67102	9.10765	9.44565	8.77633	9.06864	9.21088	8.46836	8.70231	9.05894	9.22709	0.000821906	0.0177385	0.402952	0.858801	0.566608	0.0196654	0.00351192	0.0432199	-0.383287
1632328_at	---	2	7.07688	7.16688	8.03518	7.45708	6.99795	7.25752	6.87366	6.88974	6.96775	6.85027	6.87932	7.17184	7.57714	7.23743	7.72035	7.56177	7.30687	7.44282	7.40833	7.19004	7.22352	7.04163	7.11251	7.554	6.99797	6.80835	6.72348	6.88196	7.10891	6.98516	7.15414	6.92396	6.65294	7.12456	6.99205	7.18137	0.0043315	0.049755	0.229361	0.202261	0.342415	-0.174103	0.000465414	0.0124318	-0.403464
1632345_at	CG8353	2	9.65744	10.353	9.84707	10.808	9.77598	10.1738	11.0589	10.0799	10.2542	10.1473	9.81872	10.7353	10.5363	11.0074	10.8565	11.11	10.8497	10.6317	10.7557	11.1071	10.8959	10.7726	10.4823	11.5912	10.6763	9.85344	10.3471	9.88507	10.5381	9.91434	10.139	9.89848	10.0446	9.63948	10.1976	10.6119	9.65e-05	0.0049741	0.657223	0.664759	0.508819	-0.0803646	0.000107758	0.00520342	-0.737588
1632461_at	CG31233	2	10.6907	10.5785	10.654	10.4417	10.9783	10.0353	11.2038	11.2891	10.8273	11.1942	11.5335	10.8263	11.0241	11.3487	11.378	11.2462	11.3523	10.7195	11.5941	11.1749	11.1697	11.5884	11.8163	11.4654	10.7511	10.7611	11.0688	10.7045	10.4674	10.7842	10.8082	11.2906	10.983	11.1177	11.524	11.21	7.49e-05	0.0042438	0.468723	0.330172	0.395258	0.101502	0.00152046	0.0262166	-0.367221
1632600_at	CG34232	2	9.82402	9.98524	9.7844	10.1513	9.76106	9.86412	10.0326	9.94331	9.4566	9.49971	9.64034	10.0192	10.3311	10.5009	10.2447	10.4283	9.95103	10.4009	10.6149	10.3754	10.1557	10.2109	10.2393	10.3346	10.1449	10.0068	9.85343	9.37262	10.0478	9.82177	9.99382	10.0578	9.87537	9.64953	9.9629	10.3916	4.85e-07	0.000221481	0.485493	0.296786	0.38232	0.101363	0.00137573	0.0245644	-0.38413
1632659_at	NPC1b	2	11.2654	11.0263	10.7029	11.0537	11.4911	11.1782	11.3641	11.4982	11.3176	11.442	11.633	11.1215	10.3353	10.7708	10.1523	10.7428	10.3078	10.178	10.7005	10.5082	10.5728	10.563	10.7337	10.4998	11.2965	10.9597	11.2681	10.9548	10.8644	11.1312	11.384	11.4091	11.0797	11.1951	11.4061	11.0097	1.66e-06	0.000494178	-0.752426	0.252951	0.365786	-0.0946237	7.67e-06	0.00106591	0.657802
1632705_at	ninaD	2	6.49985	6.03802	6.53838	6.16463	6.33598	7.1702	7.24933	6.10269	6.54765	7.59781	6.19897	6.78998	5.03331	4.58416	5.68442	5.71208	4.78063	5.50882	5.33727	5.64782	4.88474	5.09063	5.06508	5.26416	6.04368	6.73366	6.27631	6.18934	6.16028	7.14196	6.23319	5.34383	6.13799	5.96147	5.12754	5.63216	5.53e-06	0.000924523	-1.3867	0.0164088	0.109362	-0.521009	0.00110204	0.021551	0.86569
1632874_at	CG6602	2	8.40608	8.53676	8.23153	8.26861	8.12591	8.38632	8.54717	8.00559	7.40429	8.6535	7.70686	8.55747	8.98351	8.74965	9.1217	9.08835	8.66841	8.51584	8.84519	9.10446	7.70439	8.9688	8.56583	9.12158	8.57947	8.595	8.16074	7.69843	8.19153	7.69941	8.48223	8.1952	7.77403	8.36306	7.95926	8.65291	7.19e-05	0.00418783	0.550635	0.67788	0.513203	-0.0399015	0.000272178	0.00905947	-0.590537
1632882_at	CG11671	2	10.1133	10.0557	10.1711	10.7168	10.5333	11.0129	11.447	10.749	10.5442	10.6752	10.2877	11.4386	10.7387	10.7647	11.0263	11.095	11.4169	11.4063	11.6701	11.2209	11.3955	11.649	11.2714	12.1079	10.8871	10.5484	10.741	10.1082	11.1075	11.001	11.1228	11.1062	11.1797	10.9327	11.1147	11.5765	1.83e-06	0.000514689	0.668164	0.0347576	0.164614	0.306781	0.00158695	0.0268339	-0.361384
1632901_s_at	c(3)G	2	8.16993	8.27302	7.67909	7.9265	8.15003	7.84293	8.52405	8.25882	8.01958	8.32307	8.46262	8.09267	8.03056	7.65551	7.71927	7.44633	8.02716	7.87912	8.02546	7.5333	7.88759	8.12287	8.01219	7.97163	8.22786	8.15764	8.362	8.47124	8.16696	8.27007	8.18229	8.08984	8.31918	8.52229	7.91038	7.80084	0.00282479	0.0379807	-0.284276	0.575126	0.480711	0.0631906	0.00383748	0.0457857	0.347466
1633267_a_at	CG12970	2	5.07454	5.24055	5.0464	5.72667	5.27624	5.84235	6.08592	6.04901	5.4866	5.53581	5.36199	5.81797	5.56772	6.68446	5.92899	6.13197	6.66863	5.91436	6.34843	6.27153	6.52807	6.68127	6.76776	6.73099	5.44794	5.48095	5.54171	5.38132	5.5766	5.33928	5.66425	5.76985	5.40121	5.2464	6.01247	5.8828	0.000158474	0.00662886	0.806677	0.884681	0.573718	0.0167257	1.56e-05	0.0015474	-0.789951
1633308_at	CG6660	2	9.20361	9.28957	9.50602	9.14317	8.81244	8.9802	9.20853	9.08375	9.21568	9.42897	8.83971	8.93194	9.34506	9.69896	9.68709	9.7256	9.46915	9.48121	9.63702	9.48081	9.47664	9.67003	9.39989	9.53786	9.3553	9.31538	8.94979	9.09663	8.93416	9.18685	9.20526	9.22604	9.16539	9.20503	9.26011	9.63482	5.11e-06	0.000890214	0.413811	0.427041	0.430627	0.0742641	0.000581769	0.0142046	-0.339547
1633434_at	CG18327	2	7.8117	8.22031	8.23287	8.11793	7.70575	7.94447	7.94094	7.70438	7.61274	8.28872	7.73037	7.66923	8.03876	8.24898	8.04086	8.40671	8.19723	8.16676	8.39174	8.37622	7.67032	8.46502	8.11027	8.15648	7.80184	7.73717	7.41149	7.80092	7.9421	7.81538	7.89126	8.07704	7.62442	7.67369	8.04692	7.89041	0.00222976	0.0329846	0.274163	0.360589	0.406266	-0.105564	0.00013494	0.00591026	-0.379727
1633532_at	CG5767	2	11.1751	11.6142	10.9511	10.6274	11.3045	10.8463	11.6327	11.187	11.0774	11.3058	11.0038	11.6978	11.3367	11.919	11.82	11.7966	11.3104	11.7285	12.0599	11.9889	12.0495	12.2078	11.823	12.0025	11.6521	10.6493	10.7057	10.3711	10.8629	11.5702	11.4719	11.342	11.3946	11.567	11.5253	12.0034	0.000103159	0.00509661	0.634976	0.685928	0.5155	0.0576914	0.00251023	0.0355591	-0.577285
1633621_at	Muc18B	2	5.15647	5.23393	5.00748	5.45467	5.1128	5.25784	4.87403	5.26646	5.03045	4.77224	5.14304	4.90338	5.47055	5.65299	6.11643	6.20519	5.21469	6.12015	5.83306	6.12177	5.88803	5.019	6.24913	4.98577	4.94674	5.20072	4.91799	4.80696	5.08721	4.9633	4.73405	4.93903	5.18473	4.81323	5.42048	5.07993	0.000120535	0.00553089	0.638663	0.231917	0.357175	-0.093202	0.00030444	0.00968665	-0.731865
1633690_at	CG8323	2	8.76122	8.96706	9.13203	9.06846	8.93003	9.03478	9.16572	8.88595	8.79351	9.29065	8.82379	8.97681	8.9084	9.07431	9.17031	9.35275	9.18295	9.19336	9.37113	9.22845	8.90536	9.39425	9.06245	9.322	8.90538	9.0463	8.66839	8.93373	8.96778	9.02691	9.14735	8.94717	8.90811	9.08929	8.70038	9.0869	3.03e-05	0.00246933	0.194644	0.518417	0.460533	-0.0335245	0.000471092	0.0125059	-0.228168
1633698_at	l(3)neo18	2	12.2975	12.491	12.4887	12.4156	12.3776	12.513	12.5487	12.3699	12.4208	12.5262	12.3957	12.3834	12.6379	12.5563	12.6028	12.4776	12.4391	12.692	12.6469	12.6175	12.5372	12.6884	12.6099	12.5998	12.5216	12.5581	12.4017	12.1514	12.473	12.4848	12.3775	12.3727	12.4868	12.491	12.288	12.538	6.24e-05	0.00379241	0.15642	0.864916	0.568042	-0.00697661	0.000747444	0.0166467	-0.163397
1633701_at	CG16985	2	10.1973	10.3049	10.7059	10.8147	10.4455	10.6237	11.0375	10.7464	10.4248	10.7116	10.4786	10.8689	10.6272	10.6037	10.9804	10.7827	11.0697	10.8827	11.2859	10.9729	10.89	11.2824	10.8472	11.5575	11.0043	10.6632	10.5215	10.1378	10.7807	10.2207	10.685	10.6445	10.3395	10.4906	10.7527	11.1383	5.34e-05	0.00345835	0.368521	0.989686	0.600103	0.0015802	0.0031915	0.0407739	-0.36694
1633885_s_at	CG6950	2	10.5824	10.7519	10.7406	10.5997	10.4036	10.5818	10.4893	10.5183	10.4735	10.5323	10.4317	10.365	10.6661	10.8138	10.7177	10.758	10.451	10.6147	10.5289	10.6572	10.5458	10.6985	10.539	10.4812	10.571	10.6902	10.223	10.3083	10.5057	10.4946	10.4768	10.4759	10.2201	10.4092	10.4228	10.4095	0.000325634	0.00996809	0.083475	0.057551	0.212237	-0.105243	0.00237487	0.0343704	-0.188718
1633955_at	pcl	2	8.61283	9.17283	8.41577	8.60513	9.01976	8.87432	9.34865	9.15882	8.69458	9.03672	8.89139	9.28551	9.05651	9.59888	9.21844	9.49654	9.1055	9.70464	9.75462	9.67595	9.30363	9.77761	9.15087	9.9813	9.20697	8.66017	8.40661	8.40842	8.72133	9.22549	9.51533	9.10721	9.20185	9.1949	9.03496	9.1922	7.72e-06	0.00106591	0.559013	0.513915	0.459111	0.06326	0.000780722	0.0171291	-0.495753
1634048_a_at	bgm	2	11.5203	11.3135	11.1863	11.0883	11.2399	10.8935	11.0706	11.0528	10.7224	11.3395	11.2294	11.0968	11.7112	11.7478	11.6322	11.683	11.5693	10.998	11.4949	11.4614	11.0395	11.4856	11.4829	11.4412	11.3097	11.5547	11.3415	11.3836	11.0272	10.6285	11.261	11.2868	10.8162	11.3378	11.2226	11.1322	5.41e-06	0.000920322	0.332812	0.426927	0.430593	0.0457095	2.08e-06	0.000545497	-0.287103
1634113_at	gk	2	7.78988	8.23047	7.97511	7.65137	6.82793	7.67338	7.80052	7.44076	7.09129	7.77856	7.27659	7.7545	8.15325	8.24709	8.16914	8.04039	7.25973	7.84497	7.83394	7.95669	7.59338	7.9591	7.68681	8.16408	8.19762	8.17552	7.59934	7.46655	7.23998	7.67186	7.8219	7.30599	7.29221	7.76914	7.28247	7.88596	9.03e-05	0.00477597	0.301516	0.608357	0.491303	0.0348492	0.00264304	0.0365998	-0.266667
1634129_at	CG9663	2	9.15982	9.3578	9.03155	9.28625	9.40653	9.32124	9.26934	9.3492	9.31336	9.37085	9.36365	9.21569	8.65327	8.99725	8.83645	9.07194	8.87316	8.90251	9.15275	8.97771	9.10974	9.05316	9.02177	8.94989	9.21724	9.12746	9.05595	8.92202	9.11838	9.2342	9.21773	9.30876	9.25996	9.11122	9.31827	9.16951	2.95e-06	0.000674975	-0.320474	0.0127448	0.0953662	-0.115382	0.00208515	0.0313662	0.205092
1634142_at	CG6403	2	6.18111	6.59632	5.97699	6.25274	6.37147	6.66617	6.28137	5.61748	6.48844	6.898	5.87826	6.12987	7.00641	6.83916	7.15035	7.52646	6.54554	7.6762	7.26168	6.97515	7.04905	7.04964	6.84379	7.14408	6.34238	5.70718	6.39996	6.39485	6.08521	6.70644	6.66404	6.66593	6.77165	6.69244	6.96913	6.72685	3.97e-05	0.0029186	0.810775	0.173648	0.327345	0.232323	0.000238142	0.00844854	-0.578452
1634187_x_at	---	2	7.78881	8.32039	8.62232	7.71857	7.37436	7.34368	7.23398	7.74147	7.0462	7.78167	6.95583	7.2776	8.26753	8.52706	8.44852	8.89737	8.58093	8.71916	8.4513	8.41751	8.26459	7.93237	8.29815	8.28447	7.54267	7.39747	7.51416	8.15669	7.86957	7.48317	7.69979	7.14207	7.82274	7.4452	7.33822	7.20377	0.000243431	0.00856039	0.823674	0.7834	0.545757	-0.0491133	2.8e-07	0.00017486	-0.872787
1634205_at	CG15254 /// DsecCG15254	2	6.77246	5.8029	5.98066	5.55965	6.99626	6.4048	7.54286	6.87603	6.16202	7.73734	7.03397	7.0815	7.16875	7.04689	6.70069	7.11222	7.13726	7.25784	7.92467	6.81902	6.82143	8.36543	7.34306	8.32664	6.73917	6.01239	6.65658	6.19971	6.33542	6.62536	6.90269	6.58755	6.73455	6.49441	7.21669	7.42996	0.00053732	0.0134904	0.672787	0.993969	0.60071	-0.00133198	0.00107195	0.021143	-0.674119
1634210_at	CG15649	2	5.42339	6.2049	5.99457	5.64514	5.11791	5.17246	5.82469	5.13642	4.93462	5.30201	5.3556	5.27295	6.30245	6.10134	6.29431	6.17079	5.07465	6.60264	6.78631	6.30601	5.7462	5.95922	5.65793	6.20261	5.75899	6.03467	5.56825	4.88964	5.48764	6.24786	6.05268	5.49197	5.64742	5.39562	5.19255	5.96475	0.000559652	0.0138706	0.651648	0.215817	0.349076	0.195615	0.00388011	0.0460545	-0.456033
1634219_a_at	Jafrac1	2	13.6695	13.5224	13.6592	13.5016	13.5064	13.2666	13.5184	13.6784	13.6652	13.5247	13.7832	13.5466	13.3554	13.5564	13.3686	13.2591	13.4438	13.1624	13.3335	13.3061	13.2875	13.3269	13.3861	13.3324	13.3806	13.528	13.5364	13.648	13.4513	13.4648	13.5151	13.5214	13.3286	13.4202	13.6058	13.4845	0.000108511	0.00520966	-0.226978	0.105534	0.276269	-0.0797737	0.00187875	0.0296401	0.147204
1634237_at	nimC3	2	7.46209	7.12134	7.12283	6.94295	7.1959	6.80325	7.01429	7.25464	6.52145	7.27339	7.27781	6.81581	7.43019	7.54331	7.16107	7.60479	7.38311	7.02109	7.44424	7.41266	6.829	7.35328	7.30049	7.4718	7.21937	7.40237	7.26205	7.21896	6.91384	6.54892	6.7756	7.02149	6.7805	6.97075	6.89065	7.08366	0.0027414	0.0373172	0.262439	0.465675	0.444025	-0.0597999	0.000252235	0.00872631	-0.322239
1634239_at	CG14205	2	11.4086	10.2555	10.1064	10.7219	11.2366	11.5552	10.112	11.2694	11.1509	10.7048	11.2279	10.7251	9.77227	10.4594	9.86235	10.0853	9.94415	9.6685	10.0195	10.1553	9.48011	9.59047	10.5257	9.19776	10.706	10.3704	10.7343	11.1688	10.3363	11.1084	10.84	11.0156	10.8282	10.2036	10.6037	10.1879	0.000421353	0.0116685	-0.976088	0.235445	0.358818	-0.197558	0.000115617	0.00543688	0.77853
1634249_s_at	Pdsw	2	12.0618	12.085	12.0616	11.9436	11.9491	12.0496	12.157	11.9115	12.113	12.0874	11.872	12.0134	12.0891	12.2178	11.9997	12.2058	12.0984	12.2202	12.276	12.1081	12.1385	12.2793	12.0644	12.1659	12.0229	11.9989	11.8426	11.8867	12.0852	12.2207	12.0799	12.0232	11.9978	12.1439	12.0056	12.2037	0.000430958	0.0117929	0.129866	0.662067	0.508118	0.0171882	0.00287922	0.0382834	-0.112678
1634250_at	Act57B	2	12.7102	13.0314	13.0886	12.886	12.7263	12.746	12.4257	12.691	12.5355	12.5706	12.7808	12.7535	13.0387	12.9655	13.2233	12.9989	12.9521	13.0428	12.8561	13.0901	12.8661	12.7105	12.8972	12.9277	12.7887	13.0388	12.5257	12.7202	12.8719	12.8129	12.9035	12.7819	12.6052	12.6214	12.705	12.5832	0.000259063	0.00889004	0.218623	0.988277	0.599829	0.00105877	0.00340201	0.0424206	-0.217564
1634310_at	TpnC4	2	8.03171	8.61245	8.63655	8.16737	8.11162	8.52203	8.28836	7.85363	7.5452	8.09496	7.94218	7.1971	9.08797	9.09708	9.44411	9.53569	8.09534	9.65158	8.9852	9.48041	8.64663	8.70795	8.72189	8.86335	8.07485	8.74622	7.63533	7.10556	8.86863	8.52042	8.8482	8.30507	7.89963	7.74897	8.07296	7.86872	3.23e-05	0.00256728	0.942837	0.744206	0.533471	0.0576171	0.00284405	0.0380559	-0.88522
1634323_at	CG17191	2	4.88444	4.5122	4.66419	4.71956	5.29661	5.84747	5.74855	4.71277	4.98343	4.89268	4.79254	5.13424	5.03869	5.46526	5.46968	5.39415	6.42403	6.59762	6.17047	5.33563	5.40078	6.03799	6.51767	6.87427	4.48272	4.57364	5.35971	4.70411	5.23338	5.04541	5.05723	5.12818	4.75386	5.27445	5.08496	5.44018	6.99e-05	0.00412543	0.878128	0.975088	0.596899	-0.00423908	4.74e-05	0.00320439	-0.882367
1634417_s_at	CG3683	2	11.3615	11.4888	11.4324	11.3495	11.4311	11.542	11.6295	11.3706	11.5419	11.6075	11.3919	11.4501	11.5415	11.4921	11.4389	11.4644	11.5955	11.7594	11.842	11.6006	11.6408	11.815	11.5919	11.7317	11.4935	11.5137	11.3855	11.2814	11.4869	11.5615	11.4531	11.4403	11.5297	11.5699	11.3927	11.7589	5.54e-05	0.00353899	0.159741	0.524761	0.463161	0.0225225	0.00201695	0.0306381	-0.137219
1634429_at	CG8360	2	10.9797	11.3692	11.1433	11.4786	11.0408	11.3137	11.0302	10.9828	11.1165	10.9268	10.7864	11.1887	11.0768	11.4508	11.2737	11.669	11.1329	11.3688	11.2564	11.6677	11.1622	11.0413	11.1143	11.42	11.2577	10.9787	10.9384	10.7184	11.0704	10.9931	10.9399	10.9213	10.9371	10.6011	10.9744	11.2714	0.00343424	0.0426237	0.189775	0.102378	0.27325	-0.146227	0.00269785	0.0371662	-0.336002
1634614_at	hfw	2	9.21696	9.275	9.18213	9.3267	9.11013	9.20886	9.19244	9.19735	9.11624	9.3475	9.14071	9.13979	9.14349	9.48897	9.30123	9.4185	9.31049	9.44841	9.25173	9.41168	9.42865	9.38316	9.26436	9.56406	9.25261	9.25039	9.24199	9.17319	9.12283	9.27928	9.18621	9.28853	9.31229	9.15319	9.23403	9.17232	0.00134985	0.0243209	0.16341	0.5751	0.480711	0.0177547	0.00238258	0.0343887	-0.145655
1634786_at	lectin-28C /// ninaE	2	9.80316	10.1318	9.98385	9.54381	9.66989	9.97854	10.2557	9.33929	9.16586	9.64579	8.94628	9.93322	10.5032	9.68452	10.5461	10.8711	9.71067	11.1322	10.3366	10.9014	10.0399	10.8459	9.96312	10.6031	9.8434	10.0976	9.53988	8.63728	9.67524	9.90645	9.59788	9.94403	9.9549	9.65997	9.08111	9.91788	0.00135376	0.0243638	0.728393	0.746289	0.534342	-0.0451281	0.0022633	0.0332356	-0.773521
1635065_at	CG7025	2	8.79346	8.70613	8.57729	8.61497	9.33231	9.15111	9.22248	8.96016	9.28112	9.23663	9.00276	8.46736	8.25707	7.85136	8.04345	8.33396	7.70319	8.33426	8.79007	8.31436	8.33352	8.37145	8.30121	8.083	8.49926	8.95154	8.53413	8.55808	9.10593	9.41788	8.6236	8.77189	9.10949	8.77536	8.5781	8.84883	2.24e-05	0.00206623	-0.719073	0.166344	0.323716	-0.130974	0.000846977	0.0180646	0.588099
1635086_at	CG4666	2	9.1554	9.49182	9.52414	9.5837	9.27805	9.24672	9.43327	9.36777	9.37455	9.51651	9.38499	9.17437	9.5197	9.50794	9.71143	9.56433	9.8125	9.52403	9.50051	9.63112	9.40092	9.66499	9.49222	9.54548	9.58295	9.45476	9.34454	9.39364	9.39274	9.28779	9.35169	9.49005	9.40187	9.37671	9.29228	9.31102	0.00218328	0.0325372	0.195327	0.810045	0.553569	0.0123988	0.000947922	0.0194379	-0.182928
1635384_at	ZIP1	2	7.12028	6.91743	6.98547	7.12403	7.22502	6.85675	7.69467	7.5839	7.3808	7.54733	7.41054	7.14007	5.2804	6.11592	5.34908	6.16594	5.31115	5.62962	6.61688	5.97979	5.37033	6.08413	6.10084	5.70307	7.15587	7.07901	6.90668	6.5942	6.86856	7.29796	7.11622	6.98851	6.78261	6.77109	6.8051	6.62292	4.93e-08	6.17e-05	-1.43993	0.0112985	0.0884269	-0.333131	8.03e-06	0.00106591	1.1068
1635403_at	shf	2	8.2508	9.14712	8.62773	9.29611	8.56931	9.41498	8.53006	8.58213	8.50546	8.52244	8.42874	8.75155	8.98757	9.3582	9.44812	10.1156	9.12665	9.76404	9.42693	9.79654	9.56008	8.87519	9.40152	9.50498	9.12006	8.9276	8.81622	8.71197	9.0377	8.62904	8.84436	9.0841	8.92472	8.39901	9.03325	8.83264	4.9e-06	0.000890214	0.728248	0.332322	0.39613	0.144519	0.000444153	0.0120716	-0.583729
1635441_at	CG33337	2	8.92237	7.26861	6.71449	7.55864	8.4477	8.84063	7.60048	8.61517	7.63629	8.09416	8.02558	7.50017	6.26224	7.08158	7.01607	7.25516	6.82454	6.57587	7.81433	7.37169	5.8398	6.64379	7.44587	6.21741	7.65099	7.98936	7.74017	8.15746	7.70928	7.7411	8.20427	7.37614	7.42	7.82232	6.87508	7.55207	0.00260752	0.0363275	-1.07299	0.331058	0.395698	-0.248838	0.000757396	0.0168217	0.824156
1635467_a_at	CG7381	2	11.5115	11.4622	11.1118	11.5409	11.926	11.4937	11.7056	11.9183	11.6494	11.7812	11.9622	11.3076	10.8135	11.0506	10.3551	10.9254	10.9359	10.6625	11.1292	10.9624	10.816	10.9794	11.1698	10.7978	11.572	11.3087	11.5654	11.3743	11.2886	11.453	11.5876	11.6951	11.5197	11.3097	11.5318	11.3253	1.66e-08	4.45e-05	-0.731063	0.0865072	0.254297	-0.15326	1.42e-05	0.00149479	0.577803
1635481_a_at	CG6659	2	8.48288	8.63015	9.13686	8.80182	8.62298	8.62855	8.57925	8.73931	8.68821	8.68878	8.72185	8.62847	8.60183	9.05264	9.2864	9.07675	8.90339	9.07879	9.11258	9.15904	9.18171	8.98121	9.11288	9.01189	8.35447	8.91542	8.64485	8.66892	8.85749	8.86696	8.6728	8.87613	8.79796	8.778	8.89531	9.0121	1.39e-06	0.000455189	0.350832	0.250562	0.364836	0.0826083	0.000293482	0.00945008	-0.268224
1635525_at	CG9672	2	10.0378	10.6664	10.3419	10.2077	10.2719	10.1395	10.4134	10.6103	10.1777	10.2224	10.3446	10.4011	10.977	10.8237	10.8958	10.9727	10.5026	10.9987	11.0621	10.8	10.9555	10.803	10.7658	10.6727	10.496	10.3289	10.3184	9.69703	10.4665	10.2458	10.2575	10.6117	10.501	10.5074	10.66	10.7882	3.33e-05	0.00258419	0.532934	0.339695	0.399102	0.086994	0.00199734	0.0305286	-0.44594
1635552_s_at	CG31472	2	10.0129	9.94287	9.92652	10.0917	10.0997	10.0834	10.2508	9.96242	9.90854	10.0739	9.98806	10.1041	10.2747	10.1165	10.3169	10.281	10.3023	10.3747	10.4308	10.3202	10.3357	10.3876	10.2633	10.5095	10.0545	10.1821	10.1073	10.1412	10.1198	10.1379	10.107	10.0649	10.2812	10.3189	9.9985	10.3274	2.93e-07	0.00017486	0.289014	0.0149468	0.103805	0.116306	0.000177675	0.00708445	-0.172709
1635584_s_at	Tm1	2	10.7317	11.3074	11.2547	11.2516	10.8896	11.0807	10.6956	10.7065	10.4431	10.7831	10.8206	10.8089	11.361	11.09	11.5124	11.3051	11.2137	11.3917	11.2024	11.3895	11.0873	11.0258	11.1569	11.1783	11.0846	11.3329	10.6173	10.8042	11.1066	10.9605	11.0363	10.9035	10.7915	10.801	10.6013	10.7686	0.000725442	0.0163113	0.345039	0.975388	0.596957	0.00290636	0.00138308	0.0245644	-0.342133
1635679_at	lab	2	5.43109	6.07731	5.60414	5.59229	5.92063	6.05349	5.99405	5.90774	5.69127	6.08385	5.80828	5.95361	6.17141	6.17298	6.42965	6.25736	5.99152	6.53884	6.7776	6.74226	6.14357	6.85934	6.36859	6.67145	5.98256	5.94225	5.65763	4.96699	5.6252	6.17395	6.03609	5.91301	6.1499	6.20188	6.02006	6.05953	1.04e-05	0.00125196	0.583902	0.582695	0.483059	0.0509436	0.000284209	0.0093009	-0.532958
1635736_at	CG5157	2	5.62238	6.14407	6.33181	5.79498	5.96203	5.89988	6.30937	6.07292	5.83192	5.9529	5.93701	6.06136	5.86116	6.46842	6.36121	6.47468	6.63308	6.16725	6.46005	6.40533	6.23513	6.44703	6.29149	6.99201	5.85465	6.06416	5.88611	5.81777	6.27272	6.09395	5.87184	5.82486	5.5376	5.89625	6.23276	6.25992	0.000162341	0.0066921	0.406351	0.755809	0.537215	-0.0256691	0.000116637	0.0054551	-0.432021
1635784_a_at	CG32230	2	13.7853	13.8739	13.8285	13.8828	13.7616	13.8074	13.9771	13.7911	13.8521	13.9862	13.8089	13.8247	13.9622	13.8444	13.8992	13.8712	13.899	14.046	14.0145	13.9718	13.8778	14.06	13.8714	14.0088	13.876	13.9003	13.8094	13.8067	13.9336	13.8712	13.8476	13.8257	13.8767	13.8912	13.6867	13.9263	0.00271418	0.0371909	0.0955842	0.832423	0.559468	0.00599864	0.00342755	0.0425942	-0.0895856
1635975_s_at	---	2	6.21589	6.6409	6.36822	6.55634	6.1385	6.21128	6.66881	6.39635	5.95096	6.76594	6.30447	6.21823	6.62476	6.50275	7.07647	6.89847	6.90414	6.84985	6.89542	7.02696	6.20486	6.85494	6.81828	6.90613	6.33313	6.35376	6.20254	6.48063	6.23428	6.17091	6.50204	6.42441	6.18584	6.30922	6.32674	6.5633	0.000263406	0.00889233	0.42726	0.658646	0.506909	-0.0290913	3.87e-05	0.00289511	-0.456351
1636005_at	CG14495	2	9.02876	9.26874	8.87904	9.3982	9.31402	9.69366	9.82893	9.57217	9.07303	9.25965	8.98271	9.87843	9.50434	9.75882	10.02	9.91975	9.90356	10.097	10.2364	9.88876	9.77646	9.96843	9.98445	10.3968	9.49604	9.44864	9.42144	8.92049	9.58154	9.54911	9.51367	9.72263	9.49207	9.37408	9.58328	9.9927	3.67e-06	0.000755048	0.606451	0.127763	0.297222	0.159864	0.00011255	0.00532389	-0.446587
1636175_a_at	CG9084	2	8.59839	8.8181	8.24304	8.58965	8.7993	8.82494	8.96399	8.77586	8.58878	8.40236	8.45984	8.86943	9.0082	9.43214	9.02772	9.18019	9.11639	9.21553	9.44203	9.08395	9.39221	9.33529	9.28388	9.56829	8.85924	8.60448	8.55637	8.43439	8.60534	8.82475	8.86393	9.18641	9.00807	8.58975	9.10809	9.28484	1.09e-06	0.000378512	0.596012	0.0729226	0.236042	0.165998	0.000219687	0.00798819	-0.430014
1636180_at	yip2	2	12.0554	12.0885	12.0001	12.1424	12.0029	12.065	11.8491	11.9221	12.0072	11.726	11.7678	12.0291	11.7693	12.0265	11.7317	11.7198	11.7497	11.8387	11.6464	11.82	11.7178	11.6069	11.5742	11.6083	11.9608	11.9355	11.8739	11.82	11.8652	12.0112	11.8624	11.8355	11.7122	11.8044	11.8336	11.6682	1.6e-05	0.00156724	-0.237174	0.013252	0.0976572	-0.122714	0.00279062	0.0377948	0.11446
1636202_s_at	ImpL2	2	11.6287	11.4355	12.2672	11.9607	11.8529	12.1809	11.2933	11.7075	11.7095	11.1611	11.4686	11.9087	11.0438	11.3001	11.2357	11.1758	11.2356	11.182	11.3017	11.2869	11.0523	10.9122	10.9423	11.0772	11.374	11.3393	11.6976	11.5719	11.7486	11.357	11.6944	11.5566	11.1782	11.2394	11.3039	11.5313	8.44e-05	0.00455953	-0.569064	0.0216088	0.127167	-0.248542	9.31e-06	0.00116653	0.320522
1636240_at	CG7678	2	8.59199	9.2114	8.62387	8.56605	8.69696	8.65142	9.22293	8.85518	8.86157	9.03358	8.6976	8.98344	8.76951	9.37251	9.29477	9.46335	8.88079	9.32692	9.63073	9.50866	9.40074	9.67953	9.38119	9.60349	9.22685	8.5769	8.27286	8.11048	8.39513	9.04249	9.16416	8.93753	9.05885	9.13616	9.07597	9.15674	1.05e-05	0.00125196	0.526349	0.90722	0.579846	0.013176	0.00192427	0.0299289	-0.513173
1636392_at	CG15785	2	5.07835	5.18453	5.02599	5.16461	5.26392	5.07827	5.65713	5.2494	5.25877	5.59359	5.33417	5.342	5.61023	5.6497	5.81302	5.33954	5.87288	5.53846	6.05701	5.57645	5.81294	6.01841	5.99216	5.83461	5.34934	5.30718	5.82976	5.70249	5.5115	5.19327	5.39181	5.27979	5.61802	5.70178	5.26349	5.43916	3.67e-07	0.000188126	0.490391	0.0333803	0.161298	0.196407	0.0042577	0.0489773	-0.293984
1636583_at	CG5932	2	11.5762	10.9065	10.7841	10.8088	11.5462	11.3843	11.7779	11.4544	11.5965	11.6916	11.5167	10.7753	11.1354	10.446	10.7794	10.6959	10.2608	10.6769	10.9614	10.5807	10.7706	10.8179	11.1758	10.1847	11.3998	11.5344	10.8581	10.8515	11.0581	11.5556	10.8925	11.1952	11.2914	11.1944	10.9765	11.3594	0.000107924	0.00520342	-0.611085	0.319221	0.390933	-0.137632	0.00380463	0.0455292	0.473453
1636622_at	Peritrophin-15a	2	10.2948	11.0623	10.8805	10.6335	10.4504	10.4978	11.0451	10.6717	10.6557	10.7722	10.7207	10.8642	11.0933	11.39	11.3614	11.3772	11.0817	11.1744	11.6755	11.4678	11.188	11.3864	11.3803	11.3109	11.0941	10.6049	10.5582	10.1316	10.7463	10.7941	10.731	10.6273	10.971	10.7908	11.0315	11.1033	1.3e-08	4.16e-05	0.611504	0.649979	0.504734	0.0529329	0.000270495	0.00903651	-0.558572
1636688_at	Cyp4s3	2	7.16824	7.33292	7.33601	7.45455	7.46583	7.0619	6.89742	7.30321	7.12387	7.36555	7.39924	6.78095	6.51981	6.85872	6.926	6.87191	6.53642	6.59122	6.35747	6.80594	6.38241	6.6229	6.62459	6.75876	7.13071	7.36348	7.23223	7.11579	7.00688	7.01278	7.07074	7.22197	6.88626	6.99335	6.99559	6.83375	3.51e-06	0.000730615	-0.569459	0.0257347	0.140699	-0.152179	3.08e-06	0.000683838	0.41728
1636853_at	Cpr47Ef	2	8.45667	9.02197	9.03716	8.83929	8.58442	8.64426	7.97249	8.4225	7.94787	8.17796	8.11059	8.34987	8.89766	8.96454	8.99701	9.26267	8.6491	9.29348	9.1561	9.51864	9.66974	8.6834	9.30446	9.01665	8.58671	8.61201	7.84175	7.92733	8.46765	9.02506	8.25594	8.36928	8.61898	7.65946	8.15919	8.10516	0.0017684	0.0284714	0.654032	0.319061	0.390827	-0.161379	2.91e-05	0.00240234	-0.815411
1636856_at	Vhl	2	8.9086	8.99695	8.93344	9.12754	8.96867	8.96397	9.10523	8.89151	8.81941	9.13641	8.89277	8.88794	8.90621	9.12146	9.09288	9.20935	9.13078	9.27375	9.2468	9.21054	8.98617	9.18847	9.01406	9.21145	9.00585	9.0269	8.89611	8.96521	9.08016	9.00286	8.91009	8.99204	9.02686	8.83983	8.894	8.93496	0.000223463	0.00810712	0.163291	0.911205	0.580965	-0.00479596	0.00197147	0.0302812	-0.168087
1636879_at	CG14356	2	6.92487	7.16547	6.81943	6.53912	6.63562	6.70678	6.74517	6.36851	6.15785	6.84399	6.53708	6.65931	7.28044	7.14137	7.29189	7.03911	6.9136	7.16046	7.40294	7.28598	7.15254	6.61306	7.0443	7.34124	7.27077	7.20488	6.90577	6.63336	7.03195	6.77752	7.05652	6.86424	6.78642	6.6027	6.53177	6.99756	0.000769596	0.0170303	0.463644	0.0118956	0.0913128	0.213356	0.00241478	0.0346043	-0.250288
1637041_a_at	CG3332 /// DtraCG3332	2	8.10417	8.16374	8.0772	7.98034	8.08959	8.163	8.25561	8.16578	8.24966	8.1719	8.22634	8.24653	8.29094	8.12658	8.35574	8.33946	8.30567	8.61054	8.77065	8.64299	8.51358	8.71966	8.45527	8.85036	8.45345	8.00529	7.87448	7.69108	7.93563	8.3199	8.16061	8.4333	8.26004	8.15684	8.44655	8.41976	5.28e-05	0.00345385	0.340631	0.72138	0.526403	0.0219224	0.000985023	0.0199185	-0.318708
1637095_at	CG15818 /// DsimCG15818	2	6.81469	7.21866	6.90863	6.84399	6.85937	6.9739	8.05148	7.11137	7.12951	6.87913	7.07016	7.64093	7.4749	7.12552	7.62994	7.65878	7.61561	7.99919	7.80364	7.73628	7.67305	8.12255	7.70348	8.6142	7.01018	6.98631	7.28596	6.67447	7.29827	7.08893	7.58511	7.01231	7.07641	7.1225	7.17378	7.77077	0.000308605	0.00974707	0.637944	0.534401	0.466987	0.0485978	3.12e-05	0.00252904	-0.589346
1637097_at	CG7497	2	7.88944	8.26746	8.22422	8.29472	7.68924	8.0728	8.15124	8.06967	7.87378	7.8287	7.94379	8.17849	8.03201	8.4885	8.34922	8.54501	8.12745	8.27061	8.18138	8.46537	8.30084	8.28958	8.18115	8.48621	8.12928	8.26048	7.95418	7.72354	8.03627	8.01309	8.14872	8.02467	7.79022	7.81538	8.1326	8.05134	3.16e-05	0.00253501	0.269481	0.635285	0.499905	-0.0336483	0.00189045	0.0296632	-0.30313
1637319_at	Fancl	2	8.67374	8.4867	8.19881	8.50597	8.77069	8.52285	8.5457	8.75162	8.68025	8.65406	8.83968	8.69587	7.96952	8.54032	8.06067	8.43968	8.28689	7.82848	8.27925	8.04726	8.20109	8.16409	8.35098	8.24322	8.449	8.38442	8.73281	8.51156	8.27424	8.49383	8.52321	8.69163	8.46118	8.56044	8.69878	8.46272	0.000160631	0.00665582	-0.409542	0.218764	0.350589	-0.0901764	0.00174248	0.028367	0.319366
1637357_at	CG9463	2	4.50566	3.60227	3.6306	3.83123	3.83009	3.67754	4.06141	3.9234	3.9663	4.64121	4.32785	4.01768	5.98222	5.08726	5.29846	6.13864	4.9157	4.61793	5.01911	6.57043	4.50439	5.52698	6.9793	4.18202	3.53723	3.50324	3.5988	3.58448	4.31143	3.82171	4.07649	4.21855	3.9426	4.29327	4.39341	4.87717	8.28e-05	0.00450241	1.4006	0.928243	0.585396	0.0119286	0.000580245	0.0142046	-1.38867
1637403_at	CG7953	2	14.3305	14.3649	14.0823	14.1649	14.3978	14.2749	14.3805	14.3678	14.389	14.4269	14.4007	14.2218	13.9019	14.014	13.7929	14.0369	13.5592	13.8877	14.1965	13.935	13.9383	13.8986	13.9746	13.866	14.3394	14.2992	14.3716	14.1782	14.2808	14.3241	14.4542	14.4066	14.3369	14.2539	14.288	14.1891	8.78e-06	0.00111753	-0.400023	0.850586	0.564272	-0.00665538	2.36e-06	0.000601389	0.393368
1637538_s_at	CG9485 /// DsecCG9485	2	9.73734	10.0665	10.3199	9.82808	9.51371	9.85989	9.6155	9.59414	9.83259	9.81935	9.92364	9.79852	10.0488	10.0488	10.1643	10.3586	9.81517	10.1279	9.91077	10.1091	9.99675	10.2818	10.1854	10.4994	9.86703	10.0664	9.90716	9.81743	9.66418	9.7162	9.56973	9.90171	9.5707	9.77598	9.88673	9.69874	0.00099863	0.020102	0.303121	0.48928	0.451354	-0.0389273	0.000181642	0.0071919	-0.342049
1637561_at	lectin-33A	2	8.4306	8.6328	8.54358	9.0474	8.53732	8.53955	8.85072	8.72761	8.96513	8.74256	8.31379	8.13996	8.59372	8.85037	8.67205	9.27621	9.04003	9.38165	8.96939	9.19214	8.9342	8.98227	8.96149	9.17643	8.65063	8.59436	8.39669	8.16332	8.92389	8.62942	8.50925	8.26131	8.67023	8.23721	8.07213	8.68481	0.00187718	0.0296401	0.37991	0.257301	0.36669	-0.139815	0.000437459	0.0119301	-0.519725
1637590_at	CG42329	2	7.5001	7.47636	7.39029	6.51059	5.44451	5.92688	7.49624	6.35859	5.49643	7.19985	6.37159	6.7242	7.71611	8.01013	7.35089	7.32135	5.7959	6.37626	7.55698	7.52151	5.4992	7.82773	6.44844	7.6014	6.95472	7.39683	6.16726	5.70685	5.79088	5.90103	7.45741	6.50195	5.6394	6.72505	6.5653	6.72257	0.00281428	0.0379549	0.427524	0.172002	0.326632	-0.197198	0.00296865	0.0389556	-0.624722
1637647_at	CG31148	2	12.3465	12.2391	11.6109	11.9238	12.3423	12.4216	12.2052	12.4532	12.1972	12.5191	12.2047	12.1829	11.3327	12.0581	11.602	12.0446	11.3054	11.588	11.8251	11.8146	11.7089	11.5903	11.6095	11.4966	12.2348	12.147	12.4873	11.9586	12.0592	12.2668	12.5561	12.5064	12.2403	12.3076	12.4323	12.2286	0.000387282	0.0112099	-0.555898	0.486265	0.450924	0.0648756	2.29e-05	0.00207778	0.620774
1637701_at	Cpr49Ab	2	9.36371	9.23107	9.32438	9.18102	9.02766	8.92167	9.4222	9.26345	9.4155	9.63534	9.42815	9.11263	9.68968	9.72228	9.65454	9.63363	9.80166	9.24786	9.77119	9.58976	8.95499	9.84749	9.62876	9.47473	9.39315	8.92968	8.95497	9.72317	8.92483	9.06238	9.0994	9.07644	8.81511	9.23595	9.03095	9.66342	0.00322858	0.0410562	0.307482	0.292324	0.380185	-0.118111	0.00144398	0.0252522	-0.425593
1637797_at	CG14400	2	9.04339	9.65264	9.55957	9.57679	9.17762	9.71039	9.10711	9.02534	9.09899	9.26363	8.83251	8.89718	9.43217	9.66848	9.93628	10.26	9.26856	10.0613	9.72632	10.114	9.72972	9.59679	9.51445	9.72393	9.45572	9.58426	9.19737	8.88927	9.48237	9.47208	9.23595	9.45256	9.34128	8.9412	9.03109	9.475	0.000129816	0.00573463	0.507232	0.654887	0.505828	0.0510823	0.0028455	0.0380559	-0.45615
1637900_at	CG11852	2	8.18661	8.40843	8.36196	8.3479	8.29344	8.3351	8.06451	8.09611	8.06687	8.03071	8.17442	8.04659	8.31841	8.68713	8.66183	8.84706	8.79156	8.95257	8.78926	8.88921	8.83043	8.56352	8.76428	8.85537	8.25202	8.48664	8.16498	8.44716	8.30642	8.5612	8.38091	8.74248	8.64094	8.20406	8.32931	8.48015	3.11e-06	0.000683838	0.54483	0.0104068	0.0846287	0.215301	6.03e-06	0.00095296	-0.329529
1638086_at	CG3746	2	6.90383	7.16564	7.06491	7.1219	6.94347	7.03445	6.90028	6.65641	6.73103	6.91916	6.87682	6.93499	7.22372	7.32135	7.23922	7.3058	7.24103	7.31825	7.25977	7.42362	6.96597	7.07358	7.05091	7.19242	7.05981	7.35435	6.84941	6.84286	7.19396	6.88041	6.71748	6.91311	6.91327	6.7818	6.45624	6.91984	0.000124039	0.0056029	0.280231	0.65276	0.505404	-0.0308607	0.000361673	0.0106952	-0.311092
1638109_s_at	CG2975 /// CG4692	2	13.5702	13.5713	13.594	13.578	13.5345	13.5823	13.7136	13.5137	13.6707	13.6852	13.5615	13.5583	13.6453	13.5473	13.6315	13.5813	13.632	13.7384	13.7561	13.6391	13.6899	13.7591	13.6309	13.7386	13.5965	13.5952	13.5362	13.561	13.631	13.6559	13.6091	13.5061	13.5963	13.6649	13.4755	13.6764	0.00193817	0.0300582	0.0713486	0.909215	0.580278	-0.00244219	0.00146672	0.0255093	-0.0737908
1638361_at	CG12374 /// DsecCG12374	2	13.3511	13.8591	13.9163	13.1148	13.5902	13.3913	13.5472	13.44	13.3424	13.8129	13.4415	13.2124	14.4273	14.3372	14.2628	14.1768	14.1862	14.3176	14.2445	14.0429	14.1995	14.3172	14.3383	13.73	13.4445	13.4516	13.1571	13.2683	13.9704	13.8241	13.7223	13.7282	13.5521	13.9659	13.7032	13.7375	6.32e-07	0.000253221	0.71344	0.255106	0.366009	0.125528	8.65e-05	0.00465265	-0.587912
1638417_at	CG31373	2	10.324	10.5901	10.5567	10.6479	10.5577	10.7713	10.676	10.4226	10.6455	10.7723	10.1541	10.4312	10.6537	10.6951	10.6478	10.9199	10.7537	10.8083	10.9266	10.7371	10.8127	10.8623	10.4922	10.699	10.6135	10.4169	10.2996	10.4965	10.7433	10.6438	10.6439	10.6265	10.4838	10.465	10.4591	10.7386	3.16e-05	0.00253501	0.204916	0.922163	0.583789	0.00676127	0.00153123	0.0262884	-0.198154
1638523_at	CG32633	2	8.36521	8.52573	8.2884	8.57121	8.70826	8.64635	8.9946	8.81571	8.4752	8.79999	8.81802	8.69112	8.62132	8.90411	8.79146	8.85881	8.85156	8.98411	9.24433	8.99147	8.85769	9.21784	9.1124	9.26486	8.67232	8.6749	8.59471	8.19102	8.68939	8.6439	8.65817	8.82713	8.76012	8.76949	8.81313	8.71235	1.81e-06	0.000514689	0.333348	0.697855	0.518693	0.0255702	0.000472611	0.0125059	-0.307778
1638528_at	CG15531	2	9.87629	9.8542	10.0522	9.9159	9.85759	9.62919	9.9064	9.80575	9.76241	10.0281	9.79585	9.609	10.1192	10.15	10.25	10.2634	10.3337	9.93537	10.164	10.2681	9.9907	10.2437	10.286	10.1566	9.99538	9.92328	9.92841	9.89189	9.92324	9.97624	9.95743	10.0809	9.96676	9.79048	10.0116	9.97495	1.18e-06	0.000394321	0.338987	0.0605855	0.216374	0.110639	0.000250491	0.00869428	-0.228348
1638562_a_at	Cyp6d5	2	13.8588	13.6922	13.7131	13.6607	13.7972	13.7901	13.7874	13.6766	13.9368	13.8196	13.8229	13.5054	13.4094	13.5184	13.4202	13.5173	13.2135	13.6267	13.3598	13.5325	13.7727	13.5319	13.3018	13.4193	13.668	13.696	13.4963	13.5409	13.4929	14.0032	13.6959	13.7482	13.8684	13.7102	13.5857	13.4599	0.000106579	0.0051947	-0.286434	0.0488525	0.196138	-0.0912713	0.000121755	0.00553089	0.195163
1638584_at	CG9988	2	5.13825	5.54533	5.77548	5.52003	5.75192	5.64296	5.52697	5.65974	4.84183	5.49162	5.07542	5.30369	5.76161	5.76412	6.053	5.84743	5.35669	6.26152	6.06514	6.40032	5.26429	5.84574	5.51806	5.9648	5.55164	5.39495	5.05267	4.99766	5.50796	5.17295	5.38138	5.44216	4.95301	5.08188	5.11683	4.93548	0.000710428	0.0161361	0.402456	0.029359	0.151281	-0.223723	0.000177923	0.00708445	-0.626179
1638661_at	yip7	2	14.1831	14.2376	14.2275	13.9549	14.2564	13.9284	14.1208	14.1631	14.1339	14.0309	14.1206	14.0334	14.3057	14.3836	14.358	14.1655	14.2795	14.1702	14.3776	14.2777	14.2411	14.2865	14.3825	14.1237	14.1464	13.9795	13.9362	13.9914	14.1218	14.1798	14.1494	14.1504	14.1507	14.0426	14.216	14.0515	1.87e-05	0.00176871	0.163384	0.601421	0.48905	-0.0229344	0.000328698	0.0100206	-0.186318
1638739_at	Cyp4ac3	2	7.66739	7.39758	7.09681	7.32978	7.45691	8.08504	7.27705	7.19916	7.01436	7.41071	6.81135	7.36465	7.7182	7.86811	7.59557	7.61819	7.61799	7.90341	7.58429	7.71454	7.66135	7.43726	7.50425	7.74958	7.39909	7.30942	7.22261	7.19188	7.40308	7.54879	7.59144	7.50635	7.50717	7.39616	7.55939	7.25646	0.00151648	0.026176	0.321828	0.534769	0.467006	0.0650866	0.000909996	0.0190003	-0.256741
1638818_at	Mlp60A	2	12.1549	12.5742	12.6874	12.6055	12.4489	12.4923	12.3222	12.3595	12.0453	12.2637	12.1703	12.0173	12.7219	12.4791	12.8148	12.793	12.4174	12.9593	12.7755	12.8723	12.5076	12.6039	12.6406	12.6253	12.4081	12.7106	12.1311	12.2106	12.7061	12.5264	12.4486	12.2491	12.1633	12.1647	12.004	12.4265	0.000409736	0.0115675	0.339097	0.993903	0.60071	0.00063187	0.00351737	0.0432537	-0.338465
1638969_at	CG6279	2	5.07481	5.10108	4.932	5.38891	5.13537	5.71302	5.16921	5.03132	4.78611	5.31861	4.92162	5.26296	5.1829	5.37999	5.59128	6.28443	5.82707	6.51207	5.97237	6.16119	5.7129	5.86069	5.53286	6.16099	5.01578	5.25038	5.23998	5.26381	5.10587	4.89486	5.28642	5.4057	5.1282	5.24264	5.21126	5.44528	3.92e-06	0.000768684	0.695312	0.572788	0.479782	0.0545963	0.000189971	0.00736765	-0.640716
1639196_at	Jon25Bii	2	9.61528	9.12067	9.97877	8.70892	10.1663	8.63575	9.41576	9.98774	9.3009	8.88769	9.77326	9.70545	11.1759	10.3714	10.4651	10.1451	10.4606	9.64002	10.8207	10.5601	9.63819	10.7947	10.6633	9.6403	9.59251	9.11252	8.55275	8.8773	9.50743	9.16094	9.1284	10.0189	9.43921	9.59519	10.2148	9.79468	0.000254632	0.00876213	0.923234	0.881182	0.572842	-0.0251623	0.000342899	0.0102777	-0.948396
1639295_at	CG4734	2	13.7144	13.8002	13.7501	13.6772	13.7596	13.6357	13.6657	13.7407	13.6989	13.8564	13.8198	13.4958	13.3721	13.5804	13.4762	13.5342	13.2544	13.3877	13.6726	13.626	13.3031	13.4908	13.4017	13.0298	13.7801	13.6014	13.6419	13.4463	13.6212	13.6164	13.673	13.8014	13.7026	13.5275	13.6292	13.6126	4.22e-05	0.00298409	-0.290459	0.0717849	0.235016	-0.080083	0.00388643	0.0460953	0.210376
1639351_at	Cpr97Eb	2	6.29457	6.77671	6.60274	6.81312	6.37768	6.65341	6.15001	6.41511	6.27035	6.34277	6.17605	6.14708	6.62485	6.56972	6.9869	7.15019	6.5922	7.62963	6.93925	7.19819	6.76257	6.62127	6.61546	6.77448	6.44954	6.80752	6.17428	6.0306	6.81551	6.69373	6.42281	6.40958	6.46693	6.16707	6.22828	6.39154	0.000398037	0.0114	0.453759	0.974471	0.596786	0.00314789	0.00356719	0.0436988	-0.450611
1639401_at	LvpH	2	13.4136	13.3019	13.3459	13.6155	13.3855	13.6036	13.4215	13.4439	13.4756	13.5501	13.6234	13.63	13.0721	13.2724	13.2275	13.2496	12.788	13.2896	13.0948	13.0776	13.2426	13.3283	12.9054	13.2924	13.5062	13.4513	13.4732	13.0657	13.0362	13.3394	13.3521	13.4031	13.3588	13.4804	13.4063	13.395	7.15e-05	0.00418783	-0.330839	0.0542524	0.207015	-0.12857	0.00254395	0.0357838	0.202268
1639539_at	Cyp4e1	2	7.41263	7.61226	7.55391	7.89527	7.40793	7.96093	7.27982	7.30975	7.24811	7.54378	7.33557	7.30539	7.90501	8.35161	8.25706	8.37159	7.869	8.35824	7.90501	8.19799	7.81854	7.76487	7.70396	8.08064	7.50959	7.8395	7.2774	7.29837	7.53721	7.85347	7.26152	7.34505	7.41343	7.23476	7.5271	7.14266	7.11e-07	0.000271376	0.559849	0.482073	0.449869	-0.0521071	1.33e-05	0.00147513	-0.611956
1639641_at	CG8560 /// DsecCG8560	2	10.6461	10.6389	10.4563	10.4429	10.8702	10.4139	11.0212	10.5987	11.2538	10.7162	10.6916	10.3522	10.6831	9.91963	9.76047	9.74742	9.94365	9.93	10.5362	9.73227	10.4591	10.2346	10.2724	9.7625	10.7566	10.2744	10.1693	10.0925	10.072	10.8598	10.5587	9.74451	10.5766	10.3912	10.5124	10.2105	6.55e-06	0.000991577	-0.593396	0.0111101	0.0875459	-0.323631	0.00384451	0.0457866	0.269765
1639667_at	---	2	5.46615	5.23417	5.29775	5.55603	5.55603	5.67142	5.97233	5.72855	5.52232	5.58284	5.54368	5.76168	5.76644	5.7815	5.84925	5.71804	5.95255	6.18661	6.02518	5.82227	5.96701	6.29849	5.90486	6.39417	5.66748	5.48669	5.66242	5.38412	5.48329	5.58392	5.62292	5.44311	5.88101	5.65206	5.7618	5.7862	4.49e-05	0.00310496	0.397785	0.545546	0.470911	0.043505	7.45e-05	0.00423393	-0.35428
1639737_at	CG34330	2	12.6493	12.8287	12.3831	12.6355	12.7045	12.5646	12.9297	12.8072	12.7566	12.9951	12.8717	12.8805	12.8274	12.9902	12.8503	12.8411	12.9771	12.8536	13.1159	12.8567	13.0664	13.1818	13.1095	13.0972	12.8116	12.5506	12.691	12.6002	12.6896	12.7761	12.8273	12.896	12.9754	12.8676	12.9098	12.9663	7.55e-06	0.00106591	0.230037	0.36077	0.406295	0.046239	0.000741174	0.0165762	-0.183798
1639824_at	CG34005	2	4.4145	4.76685	4.10102	4.96925	5.03536	5.02529	6.30743	5.46927	4.86829	5.41359	5.01675	5.89139	5.22302	5.34761	6.33392	6.08832	6.31841	6.4412	6.84028	6.09994	5.40716	6.14834	6.28456	7.47163	5.32222	4.62509	5.13184	4.54155	5.68864	5.56017	5.58319	5.42009	5.37709	5.24335	5.8601	5.87509	2.18e-05	0.0020179	1.06045	0.164973	0.323199	0.245785	0.000269515	0.00902257	-0.814666
1639983_at	CG34290	2	4.79943	5.77064	5.62783	5.76581	5.17091	5.44645	4.7229	5.1163	4.58643	5.74151	4.87244	4.72983	6.28389	6.48812	6.463	6.5465	5.38422	6.6528	6.61493	6.58479	6.02131	5.95928	5.6728	5.87855	5.30337	5.44284	5.33658	4.64448	5.77461	5.97999	5.36393	5.66351	5.61091	5.70681	5.30798	5.61581	2.84e-05	0.00238843	1.01664	0.137252	0.304502	0.283361	0.00138033	0.0245644	-0.733283
1640031_at	Acer	2	10.8539	11.1297	11.0809	11.0516	10.8491	10.9888	10.8183	10.6293	10.5692	10.9303	10.7157	10.628	10.9397	11.1225	11.2457	11.4148	11.0016	11.2728	11.0112	11.3202	10.9837	11.0035	11.0762	11.0262	10.9889	11.213	10.9507	10.8252	10.8866	10.8657	10.6395	10.9331	10.7293	10.6945	10.6866	10.4622	0.000612783	0.014688	0.264444	0.551921	0.473103	-0.0307941	0.000540386	0.0135185	-0.295238
1640466_s_at	CG6543	2	12.254	12.1814	12.2281	12.1707	12.113	12.1711	12.2478	12.1469	12.3364	12.2153	12.2561	12.0908	11.9425	12.0771	12.0034	12.1253	12.1517	12.0417	12.1106	12.0952	12.2114	12.2055	12.0742	12.0106	12.0779	12.117	12.1175	12.2203	12.1541	12.2421	12.1951	12.2298	12.115	12.2834	12.3212	12.3005	0.001732	0.0282538	-0.113552	0.931015	0.585902	-0.00316002	0.00390452	0.0462757	0.110392
1640491_at	CG14482	2	13.342	13.4114	13.4221	13.3632	13.2143	13.3025	13.3561	13.2056	13.3672	13.4134	13.1641	13.2475	13.3834	13.4423	13.3857	13.4454	13.3051	13.5409	13.494	13.4628	13.3927	13.514	13.3474	13.4687	13.2656	13.3575	13.1822	13.2549	13.4412	13.4284	13.345	13.2989	13.2449	13.3509	13.2187	13.4283	0.00144406	0.0252522	0.114426	0.988188	0.599829	0.00060227	0.00114747	0.0221424	-0.113823
1640672_at	CG11015 /// DmauCG11015	2	13.0739	13.2216	13.1448	13.0738	13.0461	13.0996	13.1149	13.0695	13.12	13.0676	12.9809	13.0484	13.2551	13.2627	13.1557	13.316	13.1169	13.2788	13.3326	13.2137	13.2587	13.3003	13.1657	13.2712	13.1473	13.1643	12.9671	13.059	13.1806	13.2553	13.129	13.0742	13.0569	13.1785	13.0405	13.2278	2.32e-05	0.00209415	0.155544	0.271601	0.37207	0.0349525	0.000656567	0.0152807	-0.120592
1640754_at	bmm	2	11.1154	11.1668	10.9866	11.2775	11.0771	11.0474	10.6853	11.1527	10.8023	10.656	10.9352	11.1018	11.1939	10.9704	10.7895	10.7411	10.9067	10.5522	10.6508	10.7761	10.5737	10.7388	10.5014	10.7296	11.1081	10.8855	10.9441	10.9088	11.1111	10.8414	11.0045	11.018	10.8036	11.0083	10.92	10.7359	0.00221151	0.0328417	-0.239984	0.394392	0.418522	-0.0595686	0.00257294	0.0360021	0.180416
1640857_at	CG10208	2	8.39506	8.63771	8.63985	8.51568	8.19798	8.55483	8.48649	8.31511	8.3078	8.38581	8.17897	8.35621	8.46114	8.55331	8.55886	8.85722	8.62462	8.87427	9.03251	8.95391	8.61461	8.91687	8.54647	8.922	8.32312	8.5996	8.218	8.28412	8.49015	8.58624	8.43851	8.37825	8.62104	8.56787	8.4788	8.87432	0.000706329	0.0160941	0.328689	0.348502	0.401553	0.0740426	0.00309027	0.0398665	-0.254647
1641059_at	Ca-P60A	2	7.80567	8.28781	8.28586	8.23655	8.05436	8.04277	7.79023	7.86999	7.78133	7.86272	7.92236	7.835	8.26404	8.12997	8.4974	8.41339	8.20522	8.39275	8.20892	8.42563	8.16296	7.99156	8.14031	8.35334	8.07356	8.24635	7.69146	7.58016	8.03905	8.02639	8.11054	8.0985	7.78043	7.76555	7.94764	7.79529	0.000492988	0.0128333	0.284238	0.563536	0.477032	-0.0516431	0.00161426	0.026964	-0.335881
1641278_at	mRpS7	2	10.8014	10.761	10.8401	10.6468	10.8364	10.7346	10.9049	10.6962	10.9806	10.8807	10.8617	10.7107	10.9279	10.9148	10.9151	10.8775	11.0305	11.0839	11.0063	10.9399	10.9035	11.0403	10.9368	10.9975	10.7239	10.7395	10.8294	10.9215	10.94	10.9354	10.7493	10.8325	10.9393	10.903	10.8708	10.9348	0.00046885	0.0124888	0.15991	0.174261	0.32767	0.0553514	0.00181953	0.0291188	-0.104558
1641534_at	CG11842	2	9.48249	10.011	9.93908	9.55413	9.68874	10.4736	9.21605	8.91464	8.85782	9.7231	8.69394	9.00638	10.2262	10.1344	10.2119	10.563	9.99148	10.9424	10.5972	10.4297	10.1462	10.0868	10.4169	10.0438	9.95767	9.99185	9.76491	9.34877	9.6222	9.78643	10.0008	9.95488	10.1784	9.99126	9.68455	9.69139	0.000217602	0.00796659	0.852413	0.0615078	0.218243	0.367669	0.00123945	0.0232119	-0.484744
1641599_at	CG3621	2	11.2741	11.6624	11.6808	11.4665	11.3984	11.5316	11.5466	11.403	11.3466	11.4053	11.2259	11.4473	11.6124	11.7069	11.6592	11.7712	11.4881	11.8722	11.8137	11.732	11.7045	11.7084	11.6386	11.5851	11.5414	11.5587	11.2435	11.2347	11.5853	11.6307	11.4745	11.3799	11.4745	11.5289	11.1376	11.7388	9.9e-05	0.00498779	0.241978	0.853136	0.564959	0.011668	0.00363805	0.044267	-0.23031
1624038_at	CG17024	3	5.71367	5.88865	5.65236	5.71467	5.75071	5.62815	5.61903	5.99105	6.179	6.06804	5.51949	5.45786	4.27239	4.60323	4.74741	4.6773	4.63526	4.67937	5.0093	4.73257	4.64097	4.98108	4.76641	4.61824	5.3222	5.41508	5.14275	4.9652	5.50182	5.58251	5.41844	5.717	4.84817	5.1039	5.3418	5.30687	3.96e-08	6.17e-05	-1.06826	0.00153694	0.0263044	-0.459746	3.88e-05	0.00289511	0.608516
1624549_at	CG3523	3	13.7786	14.1253	14.2132	14.0164	13.6141	13.6108	13.5661	13.9169	13.7116	13.668	14.0396	13.6677	13.8537	14.0575	14.03	13.9304	13.5887	13.5794	13.3763	13.89	13.5324	13.4054	13.8901	13.4616	13.6513	13.8856	13.7349	13.3816	13.5281	13.3983	13.4447	13.7285	13.3452	13.3784	13.6703	13.3205	0.00251013	0.0355591	-0.111058	6.66e-05	0.00400197	-0.288401	0.00190191	0.0296775	-0.177342
1628823_at	CG14120	3	9.6009	9.80207	9.27734	9.24763	10.0869	9.29711	10.0415	9.84959	9.69901	10.3106	9.89943	9.40313	9.69542	10.0523	10.3049	10.054	10.1393	10.0667	10.5024	10.3533	10.3692	10.1315	10.034	10.3605	9.58845	10.1764	10.6037	9.93572	10.2014	11.1568	10.7796	10.9906	11.2437	10.9042	10.875	10.6862	0.00179927	0.0288234	0.462354	0.000234027	0.00835699	0.885542	0.00422268	0.0486792	0.423188
1632120_at	CG15533	3	10.0287	10.2877	9.83141	9.64141	10.3374	10.1378	10.4452	10.0466	9.81434	10.5882	10.0586	9.87812	9.30113	9.3714	9.33693	9.61118	8.87755	9.51575	10.0602	9.69531	9.73718	9.47596	9.34881	9.28816	10.1766	10.3522	10.4216	9.95918	10.1401	10.8812	10.8652	10.7586	10.8231	10.8401	10.6281	10.9627	0.000262545	0.00889004	-0.623001	0.00123854	0.0232119	0.476093	2.14e-07	0.000152077	1.09909
1632646_at	Ptth	3	6.67914	6.60612	6.5147	6.65848	6.66335	6.64645	6.87313	6.4439	6.53328	6.61371	6.14904	6.4924	6.94543	6.80894	7.16245	7.14597	6.90768	7.27027	7.27407	7.19204	7.12957	7.27829	7.11505	7.39258	6.66302	7.01694	6.72185	6.63328	6.94511	7.11049	6.98984	6.8718	6.91489	6.95485	6.88976	7.13817	8.18e-06	0.00106591	0.562386	0.000504291	0.0129801	0.331357	0.00171365	0.0279951	-0.231029
1637291_at	CG18031	3	7.06103	7.03033	7.27168	7.27929	7.47837	7.49246	7.30751	7.15047	7.65798	7.39324	7.12514	7.22354	6.97408	7.32316	7.48456	7.80314	7.61922	7.73848	7.31088	7.58302	7.82511	7.39592	7.34609	7.76656	7.23308	7.00942	7.14253	6.90254	7.29935	7.30863	7.19871	6.98449	7.3042	7.1334	7.01269	7.11923	0.00259032	0.0361821	0.224932	0.00407089	0.0476837	-0.151896	0.000873733	0.018505	-0.376828
1638240_s_at	CG8785	3	9.12775	9.56683	9.35606	9.29729	9.68248	9.40556	10.0945	9.85116	9.26824	9.88217	9.56549	9.93296	9.85254	10.5831	10.7738	10.2552	10.4234	10.2828	10.8577	10.2565	10.2066	10.7007	10.7951	10.7133	9.41798	9.83749	9.70826	9.27656	9.91307	9.87335	10.2	10.1585	9.88284	10.2542	10.2544	10.0332	1.25e-07	0.000124877	0.889184	0.000261212	0.00889004	0.314942	1.49e-05	0.00152812	-0.574243
1625584_at	CG8654	4	10.4484	11.0721	10.7318	10.8917	10.5448	10.8346	10.5872	10.3632	10.1849	10.5133	10.1487	10.2972	10.6234	10.7968	10.1106	10.0629	10.5127	10.3961	10.7154	10.3331	9.79628	9.84996	9.92272	10.104	10.6025	10.501	9.85114	9.67068	9.91955	10.1008	10.2172	9.95583	9.54899	9.66134	9.57119	9.60343	0.0103799	0.0845548	-0.282819	4.77e-05	0.00321233	-0.61785	1.18e-05	0.00134503	-0.335031
1627080_at	CG17752	4	9.68313	10.2448	10.314	10.4069	10.1139	10.4746	9.55127	10.2848	10.3627	9.32587	10.0559	9.32424	10.0433	10.6626	10.1574	10.2417	9.84388	9.92233	9.16057	9.89073	10.0255	8.92316	9.9701	8.83125	9.89338	10.2152	9.37235	9.76583	10.0975	9.78754	8.88347	9.49175	9.54427	8.60497	9.70904	8.14227	0.0422795	0.182685	-0.205806	0.000798228	0.0174102	-0.552886	0.00102848	0.0205896	-0.34708
1632098_at	CG4364	4	11.4567	11.387	11.2594	11.2041	11.295	11.2118	11.4959	11.2792	11.4311	11.4655	11.4303	11.327	11.4532	11.3511	11.3857	11.1601	11.4781	11.3907	11.5731	11.2571	11.4812	11.565	11.3836	11.336	11.4359	11.4212	11.5374	11.5333	11.4647	11.787	11.5698	11.5758	11.5636	11.7123	11.4733	11.6132	0.076608	0.241773	0.0476769	0.00138635	0.0245644	0.203723	0.00413538	0.0482061	0.156046
1632688_s_at	CG11594	4	9.31142	9.97257	9.82188	9.923	9.4153	9.52274	8.91972	9.29717	9.22296	9.08913	9.16328	8.60218	9.34748	9.57055	9.36923	9.69544	8.98841	9.40495	8.85713	9.48242	9.02323	9.14626	9.15307	8.91448	9.30708	9.56538	8.71345	8.51983	8.88701	8.56497	8.63387	8.7506	8.43785	8.42289	8.74174	8.29059	0.149002	0.312886	-0.109059	0.000190216	0.00736765	-0.618843	0.00046152	0.0123965	-0.509784
1633803_at	Pgm	4	11.9392	12.1563	12.104	11.9408	11.7933	11.7472	11.5612	11.7608	11.8449	11.7951	11.7409	11.5351	12.0015	12.2143	11.9281	12.2262	11.9585	11.869	11.6008	11.8479	11.8408	11.8572	11.8273	11.5619	11.7823	11.8542	11.5847	11.7465	11.6252	11.5422	11.4397	11.6298	11.4449	11.6211	11.7329	11.2869	0.0515553	0.201639	0.0679026	0.000159446	0.00664103	-0.219045	1.55e-06	0.00048112	-0.286948
1633836_a_at	Fkbp13	4	11.5025	11.3694	11.7087	11.8179	11.796	11.807	11.7359	11.8868	11.6266	11.6045	11.6667	11.4646	11.3642	11.5379	11.6246	11.7312	11.6064	11.6003	11.5647	11.6271	11.6327	11.5516	11.6134	11.563	11.4885	11.4974	11.4831	11.6036	11.5402	11.5	11.5296	11.4935	11.4858	11.4544	11.3295	11.4312	0.0482091	0.194795	-0.0807955	0.00153283	0.0262884	-0.179157	0.00433793	0.0497931	-0.098362
1634341_a_at	CG6129	4	7.13695	7.51934	7.96809	7.69397	7.33392	7.33773	7.17662	7.46271	7.18466	7.16174	7.16542	6.73489	6.64762	7.65097	7.39611	7.54328	7.02888	7.4206	7.51621	7.67343	6.89582	6.68991	7.29555	6.83625	6.54019	7.39553	6.91114	6.92602	7.23359	7.16302	7.0673	7.06883	6.87145	6.41307	6.9273	6.69158	0.259048	0.367283	-0.106786	0.00176138	0.0284714	-0.388919	0.00198135	0.0304038	-0.282133
1634418_at	CG33281	4	7.10121	7.59403	7.6935	7.90348	7.4646	7.97802	7.17219	7.34648	7.65751	7.04025	7.30159	6.53676	7.12358	7.75019	7.80735	7.57633	7.78108	7.18471	6.94331	7.29199	6.7774	7.03047	7.24677	7.05879	6.96103	7.72678	7.1818	7.14261	7.07664	6.81212	6.61989	6.9205	6.95785	6.57848	6.94466	6.54313	0.410446	0.424476	-0.10147	0.00106383	0.0210725	-0.443677	0.000559461	0.0138706	-0.342206
1637063_at	CG33099	4	8.54654	8.77924	8.78069	9.02765	8.89479	9.00875	8.48511	8.79346	8.78141	8.4281	8.55437	8.41078	8.6385	8.63422	8.73313	8.94668	8.68782	9.05743	8.63465	8.89424	8.82466	8.50642	8.64731	8.41587	8.58852	8.59762	8.41676	8.38672	8.74887	8.74206	8.36221	8.58232	8.6791	8.3627	8.35496	8.35648	0.73759	0.531293	0.0108377	0.0030115	0.0392054	-0.192714	0.00176842	0.0284714	-0.203551
1637774_s_at	CG8389	4	8.99437	8.63553	8.58086	8.78325	8.47773	8.83428	8.3974	8.52728	8.50306	8.44662	8.48006	8.35636	8.3952	8.24852	8.5086	8.54702	8.53779	8.51425	8.23375	8.32043	8.65068	8.33212	8.02049	8.45356	8.88851	9.48896	8.64175	8.689	8.91258	9.49384	8.91576	8.57846	9.03114	8.96589	8.72549	8.77207	0.0160698	0.108227	-0.187865	0.0027394	0.0373172	0.340555	0.000204163	0.00769136	0.52842
1638858_at	CG42235	4	9.32987	9.44972	9.85039	9.73009	9.31825	9.53919	9.16448	9.59014	9.5915	9.166	9.32301	9.07956	9.33879	9.6186	9.77738	9.84553	9.50094	9.12707	9.24827	9.49468	9.42917	9.09864	9.41744	9.04844	9.33225	9.31651	8.58595	9.12462	9.37719	9.08571	8.87497	9.13739	8.82676	8.75378	9.09578	8.84152	0.751333	0.535825	-0.015605	0.0028767	0.0382817	-0.398314	0.00195144	0.0300843	-0.382709
1640505_at	CG42351	4	9.39362	9.44038	9.62064	9.36245	8.93861	9.34312	9.20824	9.12797	9.25357	9.05461	9.01287	9.15341	9.4042	9.48958	9.49216	9.18408	9.15178	9.31111	9.28117	9.16985	9.33889	9.03259	9.18586	9.15862	9.252	9.23946	8.86759	8.9479	8.74545	8.99986	9.01852	8.91464	8.77395	8.91321	8.99747	9.00717	0.465237	0.443882	0.024201	0.000670208	0.0155081	-0.269356	5.73e-05	0.00361961	-0.293557
1616608_a_at	Gpdh	5	12.4542	12.5334	12.7088	12.7452	12.4654	12.4736	12.3165	12.7357	12.447	12.4463	12.6174	12.4066	12.4903	12.5156	12.519	12.3572	12.3851	12.3975	12.2425	12.5436	12.4583	12.3384	12.4599	12.1321	12.4005	12.7149	12.3478	12.5365	12.3415	12.4702	12.2061	12.2416	12.2141	12.3067	11.979	11.9256	0.00443405	0.0504768	-0.125888	0.00721332	0.0672888	-0.222129	0.120757	0.290446	-0.0962409
1622892_s_at	CG33057 /// mkg-p	5	8.73649	8.54687	8.43057	8.67145	8.57821	8.51665	8.59592	8.52496	8.53372	8.77269	8.81863	8.62168	8.63825	8.57252	8.54097	8.4301	8.8119	8.50976	8.38868	8.5333	8.38499	8.59758	8.41432	8.72224	8.68634	8.62992	8.71112	8.85962	8.68203	8.59159	8.71585	8.68832	8.67544	8.71019	8.75184	8.2292	0.220847	0.351713	-0.0669349	0.355144	0.404382	0.0486352	0.132387	0.30112	0.11557
1622895_at	CG32075	5	9.16599	8.8859	8.95955	8.82519	9.00619	8.88137	9.29775	9.14407	9.46208	9.39204	9.28418	9.13134	8.85698	9.11564	8.97563	8.9076	9.27005	8.95693	9.0421	8.67936	9.10596	9.28634	9.0008	9.14484	9.03133	9.05654	9.26023	9.43176	9.10969	9.32141	9.12944	9.13187	9.10378	9.23103	9.17377	8.84029	0.214273	0.348348	-0.0911168	0.715965	0.52436	0.0321264	0.119624	0.289371	0.123243
1622896_at	pinta	5	9.11007	9.37576	9.17995	9.44145	9.29318	9.53241	9.29043	9.08214	9.03162	9.25964	8.9716	9.22961	9.27335	8.84853	9.34269	9.32329	8.93502	9.60141	9.42155	9.39599	9.08491	9.24982	9.14314	9.40697	9.51801	9.58305	9.20603	8.92847	9.41578	9.41498	9.23507	9.13059	9.22564	9.27766	8.7552	9.23673	0.791393	0.548324	0.0190661	0.874917	0.571128	0.0107802	0.936037	0.586958	-0.00828584
1622897_at	eve	5	4.79047	4.97496	5.10746	4.81084	5.08054	4.83978	4.93859	4.86465	4.77485	4.68851	4.66534	4.7007	5.03226	4.87558	4.92617	4.64397	5.00701	4.80199	4.92662	4.87124	4.92799	4.95578	5.04454	4.79573	4.84777	4.78572	4.77484	4.8518	4.92882	4.9459	4.79071	4.62405	4.70275	4.80977	5.02	5.19807	NA	NA	NA	NA	NA	NA	NA	NA	NA
1622898_a_at	CG34316 /// mRpS10	5	10.0951	9.61383	9.82165	9.53328	9.88047	9.59083	10.1213	10.0161	10.2689	10.1242	10.1592	9.9596	9.69659	9.83784	9.69366	9.55653	10.2542	9.74798	10.0121	9.57129	9.95592	10.1704	9.99034	9.89958	9.82717	9.71525	10.0682	10.3021	9.91124	10.056	9.84103	10.019	10.0443	10.1287	9.96137	10.1676	0.373836	0.41066	-0.0664906	0.450482	0.437987	0.0714666	0.14561	0.311045	0.137957
1622899_at	Rad9	5	4.58562	4.34022	4.24543	4.56957	4.40677	4.36091	4.25652	4.18221	4.5871	4.73081	4.57651	4.54799	4.39302	4.42723	4.28144	4.29796	4.79531	4.36915	4.57762	4.25248	4.45895	4.52309	4.44634	4.35671	4.20738	4.30218	4.6403	4.81901	4.524	4.5096	4.32028	4.17643	4.66952	4.58869	4.43782	4.47103	NA	NA	NA	NA	NA	NA	NA	NA	NA
1622900_at	Gr59d	5	3.48997	3.32867	3.42918	3.42962	3.43026	3.49019	3.3544	3.3538	3.59884	3.43897	3.22277	3.47717	3.32016	3.53001	3.25136	3.3768	3.62846	3.26374	3.49844	3.33115	3.44577	3.66039	3.34114	3.46247	3.38551	3.41362	3.41072	3.24138	3.34707	3.50868	3.27737	3.26988	3.36496	3.6132	3.44677	3.40313	NA	NA	NA	NA	NA	NA	NA	NA	NA
1622901_at	CG9993	5	4.44496	4.28697	4.5653	4.1972	4.32666	4.40375	4.50616	4.52989	4.65676	4.42828	4.79417	4.74609	4.28547	4.50188	4.34754	4.48407	4.76097	4.25453	4.37776	4.39294	4.64799	4.62423	4.7676	4.66566	4.37864	4.15874	4.45196	4.65568	4.14959	4.52193	4.46139	4.37649	4.50148	4.66193	4.37913	4.46388	NA	NA	NA	NA	NA	NA	NA	NA	NA
1622902_at	Pbprp5	5	8.74755	9.37674	9.54463	9.15833	8.85935	9.44958	8.84673	9.01312	8.41425	8.49168	9.0182	8.03817	9.09272	9.2518	9.1694	9.87674	8.75773	9.8288	9.41252	9.76554	9.1687	9.05198	8.92786	8.80031	9.22599	9.85472	8.46806	8.38714	9.16626	9.05645	9.2718	8.96427	8.43709	7.9254	8.54839	8.72491	0.0144156	0.101931	0.345481	0.648093	0.504148	-0.0773202	0.0394902	0.176114	-0.422801
1622903_s_at	Tango10	5	9.1451	9.00406	8.95589	8.87164	8.95473	8.80323	9.15435	8.91167	9.18834	9.17988	9.27547	8.9932	8.86076	9.13637	8.91387	8.6147	9.1998	8.83843	9.02176	8.73462	8.89103	9.18448	9.04283	9.12799	8.97173	8.89862	9.22004	9.34213	8.87704	8.98228	8.79755	8.92681	9.06137	9.0642	8.99042	8.93954	0.199908	0.341131	-0.0725761	0.660033	0.507357	-0.0304862	0.632082	0.49924	0.0420899
1622904_at	mfr	5	4.51384	4.27423	4.29141	4.05102	4.36762	4.10025	4.34598	4.31302	4.3201	4.20128	4.28258	4.48844	4.08182	4.685	4.07228	4.45086	4.40384	4.33972	4.31739	4.32238	4.75724	4.48503	4.35299	4.44734	4.52948	4.00166	4.29069	4.32194	4.34863	4.45914	4.41967	4.55537	4.38602	4.55632	4.83952	4.72384	NA	NA	NA	NA	NA	NA	NA	NA	NA
1622905_at	---	5	3.40898	3.28089	3.3535	3.19798	3.32649	3.19405	3.45054	3.40899	3.30462	3.29337	3.40219	3.08605	3.31691	3.61437	2.84306	3.35133	3.43692	3.43026	3.26152	3.27478	3.39302	3.32944	3.26911	3.17392	3.51857	3.46282	3.3095	3.20318	3.26604	3.2916	3.33805	3.36662	3.36885	3.37265	3.62314	3.28565	NA	NA	NA	NA	NA	NA	NA	NA	NA
1622906_at	CG9027	5	9.11227	8.41007	8.3609	7.95763	8.56881	7.69714	8.45982	8.52592	8.72331	8.78434	8.84314	8.42032	8.57207	8.7605	8.64579	8.17957	9.07724	7.85077	8.3673	8.02746	8.63922	8.59898	8.55207	8.2106	8.32873	8.20555	8.76156	9.32816	8.34289	8.58339	8.18248	8.62674	8.58848	8.85282	8.96179	8.65451	0.748891	0.535082	-0.0318414	0.443997	0.435871	0.129452	0.328809	0.39471	0.161293
1622908_a_at	CG10962	5	8.29501	8.99288	8.70509	8.57896	8.5656	8.75848	8.37149	8.76223	8.32089	8.36281	8.18456	8.3733	7.64966	8.48276	8.15411	9.00881	8.05634	8.42313	8.31803	8.57249	8.10399	7.99285	8.56803	8.14697	8.35217	8.69215	8.4435	8.54822	8.29322	8.37361	8.41318	8.57302	8.2343	8.29681	8.25302	8.61815	0.0391916	0.175596	-0.232844	0.0953323	0.264243	-0.0983296	0.171173	0.326463	0.134515
1622909_at	Pi3K21B	5	10.2055	9.9635	9.90271	10.339	10.2059	10.1172	10.4608	10.5131	10.304	10.4535	10.59	10.5865	10.2913	9.98017	10.2097	9.82166	10.4652	10.1024	10.2245	10.0569	10.0777	10.2804	10.3547	10.3815	10.3149	10.0698	10.5097	10.4427	10.3192	10.1137	10.1268	10.3501	10.3331	10.3763	10.3692	10.1214	0.142934	0.308861	-0.116294	0.84092	0.561917	-0.0162189	0.173218	0.327132	0.100076
1622910_at	---	5	3.68516	3.90141	3.83716	3.70612	3.88884	3.76288	3.89496	3.7108	3.83718	3.70706	3.69948	3.94609	3.4615	3.7149	3.68519	3.61784	3.49423	3.47308	3.69311	3.6044	3.73334	3.50026	4.07146	3.42813	3.65166	3.68027	3.72196	3.61605	3.59375	3.69774	3.98635	3.61787	3.70088	3.68088	3.78478	3.86116	NA	NA	NA	NA	NA	NA	NA	NA	NA
1622911_at	---	5	3.23625	3.43057	3.29731	3.38861	3.39011	3.09378	3.47304	3.41268	3.37325	3.55879	3.07806	3.35468	3.29023	3.52963	3.31354	3.22818	3.29544	3.24253	3.23191	3.38821	3.51176	3.32233	3.49462	3.40406	3.35622	3.27841	3.40118	3.28513	3.35206	3.33392	3.40145	3.2937	3.2438	3.4977	3.25815	3.67982	NA	NA	NA	NA	NA	NA	NA	NA	NA
1622912_at	Ucp4A	5	8.06681	8.24105	8.22494	7.93595	7.69023	7.83609	7.73526	7.95669	7.83663	7.82677	7.77538	7.76861	7.90673	8.15108	8.11921	8.03323	7.63661	8.13655	7.73473	7.91202	8.06962	7.9033	7.80214	7.93099	7.92596	8.1634	7.67587	7.661	7.8921	8.16505	8.02341	7.98852	7.67903	7.861	7.98418	7.53754	0.386945	0.415848	0.0368178	0.716184	0.524425	-0.0281117	0.417051	0.42723	-0.0649295
1622913_a_at	PIP5K59B	5	5.17765	4.94174	4.85621	4.92064	5.08688	4.92666	5.04894	5.17619	4.91955	4.82382	4.96859	4.93624	4.68893	4.91653	4.79038	4.98968	4.96178	5.06002	4.84183	4.8422	5.21535	5.19123	4.86299	4.67615	4.75673	4.91358	4.88252	4.98025	4.63198	4.91367	4.99339	5.16362	5.12131	4.994	5.10256	5.26649	NA	NA	NA	NA	NA	NA	NA	NA	NA
1622914_at	---	5	4.38497	3.86371	3.99391	3.95629	4.08895	4.09949	4.13347	4.21168	4.1747	4.29372	4.21364	4.01587	3.79979	4.095	4.27921	4.22561	4.04004	4.15921	4.15107	4.25518	4.29191	4.15138	4.36103	3.88186	4.25107	3.86083	4.27786	4.08589	3.9038	4.08749	3.99507	4.1375	4.31955	4.12714	4.14653	4.13074	NA	NA	NA	NA	NA	NA	NA	NA	NA
1622915_at	Tsp66A	5	3.5663	3.77292	3.99773	3.87483	3.83911	4.13869	3.98517	3.40864	3.90905	4.08969	3.85226	3.90298	3.75582	3.80237	3.64976	4.05673	3.67234	3.57099	3.68389	3.8186	3.98378	3.85671	3.67211	3.58406	3.9248	3.72089	3.74106	3.92537	3.56348	4.09245	3.84105	3.92181	3.93871	4.1118	3.76555	3.86162	NA	NA	NA	NA	NA	NA	NA	NA	NA
1622916_at	CG11581	5	4.90439	4.67171	5.08038	4.83927	5.06181	4.85325	5.14798	4.59739	5.00962	4.73709	5.03969	4.87935	4.76956	4.97103	4.88453	4.84796	4.87152	4.88921	4.85936	4.72662	4.91957	5.02904	4.88051	4.6235	4.90209	4.61206	5.08697	4.82701	4.90736	4.82785	4.83119	4.75042	4.83283	4.83669	4.89095	5.09919	NA	NA	NA	NA	NA	NA	NA	NA	NA
1622917_a_at	CG42355	5	3.40152	3.56388	3.5842	3.47666	3.60752	3.66773	3.44989	3.58404	3.49177	3.48439	3.86805	3.43759	3.75171	3.20516	3.52953	3.53821	3.44117	3.59124	3.36131	3.27369	3.57203	3.67912	3.52822	3.51943	3.611	3.49005	3.53755	3.65264	3.35755	3.68474	3.72892	3.61908	3.38004	3.62853	3.47115	3.74025	NA	NA	NA	NA	NA	NA	NA	NA	NA
1622918_at	---	5	3.84102	3.80488	3.8126	3.86763	3.74606	4.00192	3.75145	3.92522	3.81953	3.79848	3.52379	4.23802	3.74344	3.73852	3.76172	3.61134	3.62314	3.55405	3.72831	3.70868	3.8474	3.54718	3.78225	3.48973	3.68677	3.84572	3.61134	3.62656	3.69156	3.63261	3.70103	3.82104	3.72937	3.79097	3.63974	3.74138	NA	NA	NA	NA	NA	NA	NA	NA	NA
1622919_at	TwdlV	5	4.74812	4.65264	5.31366	4.51987	4.86893	4.73326	4.91889	4.8801	4.79029	4.72606	4.66229	4.87294	4.70172	4.80916	4.59784	4.89505	4.62282	4.82664	5.12739	4.55208	4.85564	4.80386	4.87398	4.62534	4.69094	4.55372	4.54376	4.78438	4.62374	4.6754	4.67597	4.59655	4.68801	5.08598	4.65129	4.97099	NA	NA	NA	NA	NA	NA	NA	NA	NA
1622920_at	trp	5	8.97033	9.90459	9.70244	9.77081	9.42152	10.0054	8.98333	9.29535	8.92978	9.00361	8.92515	9.10604	9.19849	8.97511	9.65706	9.53501	8.48964	10.0325	9.38747	9.70143	9.6252	8.99508	8.97438	9.34192	9.58373	9.97392	8.94615	8.08913	9.55506	9.75154	9.71966	9.2222	9.47268	9.13832	8.94209	9.17161	0.952415	0.590755	-0.00875051	0.845528	0.563028	-0.0376861	0.888416	0.574641	-0.0289356
1622921_at	CG32022	5	9.23647	8.99559	8.93595	8.91914	9.02783	9.00533	9.24563	9.06825	9.16133	9.27924	9.22477	9.11465	9.16607	9.03941	9.04552	8.88836	9.32463	8.99377	9.25079	8.95632	9.01967	9.3085	9.12146	9.17572	9.04936	9.07158	9.30157	9.38278	9.01903	9.15805	9.00453	9.07951	9.28838	9.30028	9.22607	9.27529	0.856887	0.566134	0.00633564	0.200796	0.341392	0.0785217	0.287876	0.378839	0.072186
1622922_at	CG34139	5	4.95889	5.0926	5.21526	5.21239	4.46045	4.849	4.58647	4.97001	4.43749	4.36601	4.52646	4.6133	4.81435	4.85916	5.03971	5.10149	4.13831	4.7389	4.55754	4.71726	4.70341	4.72048	4.52892	4.26409	4.45903	4.88142	4.3652	4.53869	4.70372	4.83968	4.97543	4.54888	4.40661	4.83549	4.57624	4.57928	NA	NA	NA	NA	NA	NA	NA	NA	NA
1622923_at	wrapper	5	7.03567	7.47654	7.54529	7.74474	7.31317	7.81565	7.0838	7.28331	6.75491	7.08295	6.85311	6.95329	7.19868	7.25241	7.54681	7.68097	6.51541	7.90592	7.2911	7.7031	6.97932	7.21054	6.98226	7.27036	7.37099	7.70892	6.78315	6.22023	7.49538	7.19099	7.22033	6.95282	7.04844	6.91735	6.72026	6.75561	0.59801	0.488376	0.0495401	0.20137	0.341737	-0.213162	0.186561	0.334853	-0.262702
1622924_at	CG18540	5	7.35182	8.22956	7.77098	7.73216	7.30224	7.74092	7.31155	7.16311	7.01621	7.26989	7.10707	6.88773	7.32718	7.33019	7.77251	8.06155	7.12411	7.81635	7.5892	8.10358	7.1283	7.36803	7.69092	7.3119	7.14257	7.99137	6.98611	6.77024	7.7887	7.50258	7.77706	7.41522	7.17974	7.08975	7.26816	7.1961	0.285905	0.378453	0.145048	0.637277	0.50065	-0.0646358	0.227414	0.354864	-0.209684
1622925_at	nej	5	9.62271	8.91132	8.77253	8.81936	9.00518	8.56703	8.9994	9.12274	9.22158	9.32956	9.54644	9.17271	9.44523	9.17143	9.00903	8.29884	9.53473	8.77185	9.05341	8.62197	9.03724	9.13315	9.18336	8.69509	9.17283	9.02707	9.58564	9.78988	8.82855	9.05586	8.80517	8.98277	9.28814	9.42051	9.11332	8.96349	0.365709	0.407631	-0.0946026	0.565166	0.477385	0.0785552	0.295772	0.381689	0.173158
1622926_at	CG5776	5	8.14993	7.19734	7.25603	7.48066	7.78135	7.28031	8.01059	7.8451	7.80751	8.1883	8.38585	7.87163	8.11536	7.71113	7.76603	6.90822	8.32834	7.43161	7.80031	7.38239	7.72224	7.92018	7.92079	8.12827	7.81345	7.64251	8.40685	8.49836	7.92295	7.92775	7.77904	7.94361	8.10965	8.33515	7.81842	7.53686	0.933327	0.586342	-0.00997721	0.21184	0.347259	0.206668	0.232502	0.357383	0.216646
1622927_at	CG8642	5	5.00443	5.22369	5.42935	5.02286	4.95416	5.19758	5.14581	4.98994	5.03169	5.00369	4.86998	4.96715	4.86855	5.17019	4.75481	5.04476	5.05722	5.09298	4.82271	5.1728	4.87641	5.04545	5.00659	5.01034	5.02947	4.87487	4.73916	4.89225	4.87671	4.90953	4.96182	4.85787	5.00909	5.0368	5.27355	5.04425	NA	NA	NA	NA	NA	NA	NA	NA	NA
1622928_at	Arp5	5	7.85687	7.67607	7.4485	7.5376	7.74918	7.60878	7.8359	7.69873	7.79242	7.87146	7.79169	7.6008	7.80343	7.6453	7.74555	7.53779	7.89975	7.57295	7.77122	7.54608	7.6628	7.98262	7.70535	7.87548	7.85207	7.81912	8.00283	7.81278	7.77775	7.75958	7.73929	7.8642	7.83535	7.92188	7.77422	7.53929	0.601389	0.48905	0.0233597	0.0705146	0.233094	0.102531	0.179374	0.331044	0.0791711
1622929_at	CG42613	5	4.70428	5.03444	5.14298	4.94779	4.80012	4.6995	4.75098	4.80014	4.79974	4.81804	4.93776	4.85329	5.17541	4.88328	5.14296	4.77169	5.02099	5.38261	4.94683	5.1363	4.76143	4.69342	4.8189	4.76737	5.01902	5.38187	4.82129	4.46005	4.86789	4.87335	4.78559	4.88457	5.04117	4.74877	4.58766	4.69423	NA	NA	NA	NA	NA	NA	NA	NA	NA
1622930_a_at	Cpsf100	5	8.17885	7.8966	7.87492	8.05606	8.00959	7.94902	8.06814	8.11823	8.12639	8.36759	8.35792	8.12247	8.03369	7.91565	7.98877	7.70936	8.29184	7.94747	8.04523	7.85189	7.94682	8.11356	7.99508	8.17511	8.09784	7.97103	8.39236	8.44119	7.95353	8.10419	8.0478	8.0114	8.07339	8.23025	7.97631	7.90758	0.134588	0.302649	-0.0926095	0.926673	0.584926	0.00675918	0.242207	0.36168	0.0993686
1622931_at	CG5146 /// DanaCG5146 /// DereCG5146 /// DperCG5146 /// DpseGA18689 /// DsecCG5146 /// DsimCG5146 /// DwilCG5146 /// DyakCG5146	5	7.86917	7.00539	7.15074	7.38198	7.21849	7.16525	7.39824	7.64813	7.56949	7.71978	7.8708	7.54398	7.68087	7.17972	7.39715	6.97576	7.78398	7.12603	7.39871	7.09324	7.23415	7.60172	7.386	7.51338	7.38294	7.28191	7.85021	8.15675	7.32405	7.42847	7.33267	7.44547	7.78142	7.81435	7.40103	7.31451	0.322095	0.392057	-0.097565	0.499407	0.454317	0.0810279	0.187591	0.335161	0.178593
1622932_s_at	sn	5	9.1566	8.82277	8.48228	8.96524	9.21292	9.10694	8.95787	8.81154	8.99587	9.18415	9.30405	9.07879	9.37189	8.62523	8.80324	8.26933	9.29009	9.38203	9.03618	8.70382	9.05412	9.05068	8.84363	8.90498	9.0614	8.72334	9.20883	9.39761	9.18472	9.15525	8.95003	8.86223	9.11495	9.24536	8.60871	8.80248	0.488932	0.451354	-0.0619841	0.847324	0.563554	0.0196579	0.482569	0.449872	0.081642
1622933_at	CG10344	5	7.5016	7.10858	7.01975	7.05909	7.24766	6.76205	7.64418	7.23922	7.53114	7.71467	7.70759	7.56054	7.35487	7.23893	7.28282	6.78634	7.7907	7.07031	7.2251	7.02288	7.23571	7.59177	7.47391	7.5118	7.2237	7.16251	7.64911	7.88907	7.21363	7.29906	7.1939	7.24951	7.48372	7.66124	7.32757	7.44267	0.62239	0.496405	-0.0425757	0.625521	0.497314	0.0583038	0.403724	0.422153	0.100879
1622934_at	---	5	5.88245	5.74498	5.90125	5.59238	5.90544	5.82818	6.0048	5.74431	5.9479	6.04846	5.61265	6.10023	5.93548	5.85616	5.81608	5.84592	5.6735	5.80051	5.87097	5.8706	6.04946	6.14736	5.98906	5.59136	5.99199	5.68312	5.84286	5.68843	5.85892	5.95619	5.87117	5.73159	5.84115	6.04036	5.96304	6.20463	NA	NA	NA	NA	NA	NA	NA	NA	NA
1622935_at	CG12828	5	4.32474	4.35605	4.43953	4.67302	4.55071	4.7487	4.53164	4.42942	4.93757	4.7567	4.60442	4.58242	4.70039	4.52401	4.38279	4.88625	4.49152	4.47299	4.19341	4.76627	4.76764	4.66588	4.79655	4.54407	4.46663	4.47046	4.47866	4.30489	5.18655	4.43076	4.41829	4.56825	4.28991	4.63881	4.68051	4.6349	NA	NA	NA	NA	NA	NA	NA	NA	NA
1622936_at	---	5	3.53473	3.50888	3.55049	3.37627	3.59321	3.4945	3.43179	3.45157	3.86667	3.62058	3.79621	3.29479	3.34183	3.48653	3.40963	3.52163	3.43101	3.11839	3.49585	3.38034	3.51126	3.51044	3.28004	3.45847	3.45889	3.21758	3.7041	3.38841	3.65832	3.76215	3.56474	3.48703	3.3964	3.45366	3.75955	3.72622	NA	NA	NA	NA	NA	NA	NA	NA	NA
1622938_at	---	5	3.92491	4.26854	4.1974	3.99371	4.02333	4.05251	3.94316	3.91274	3.91054	3.70278	3.88362	4.08156	4.05094	4.13004	4.12633	4.13306	4.01921	3.83449	4.174	4.04132	4.24643	4.29443	4.05393	3.87214	4.09327	4.04742	3.9545	3.98116	3.92567	4.01114	4.2417	4.06911	4.02534	3.97621	3.97438	3.86328	NA	NA	NA	NA	NA	NA	NA	NA	NA
1622939_at	emb	5	10.8337	10.8641	10.677	11.0293	11.104	10.9578	11.1264	11.0426	10.9482	11.1088	11.2523	11.0113	11.0402	10.8059	10.9465	10.6674	11.0824	10.7978	10.8989	10.7473	11.0575	11.0936	11.0316	11.1728	11.0318	11.0815	11.0874	10.9941	11.0016	10.9459	10.8839	10.8797	11.0976	11.0921	10.7322	10.9284	0.409884	0.424307	-0.0511365	0.817274	0.555769	-0.0165913	0.53577	0.467276	0.0345451
1622940_at	CG12698	5	3.82426	4.11364	3.71528	3.91444	3.93421	3.88336	3.94077	3.61382	4.08547	3.72971	3.85475	4.07316	3.57499	3.82482	3.7319	4.08885	3.66772	3.88607	3.87755	4.01438	3.93151	3.96553	3.62547	3.92972	3.7013	3.85581	3.72359	3.93271	3.9389	4.02044	3.77524	3.92672	3.92049	3.98167	3.87282	3.79678	NA	NA	NA	NA	NA	NA	NA	NA	NA
1622941_at	CG17765	5	11.3161	11.3751	11.3968	11.3345	11.346	11.4204	11.4837	11.3044	11.4417	11.2899	11.3521	11.4141	11.3127	11.3892	11.3166	11.3707	11.3594	11.3976	11.4311	11.3551	11.3694	11.4522	11.4065	11.4498	11.2849	11.3333	11.3929	11.3499	11.4425	11.4036	11.3608	11.387	11.3711	11.378	11.397	11.5426	NA	NA	NA	NA	NA	NA	NA	NA	NA
1622942_at	CG31959	5	4.42487	4.49116	4.22803	4.4425	4.20144	4.21435	4.20835	4.11839	4.09214	3.87058	4.21785	4.36003	4.16002	4.07624	4.40539	4.24699	3.91548	4.44024	4.20775	4.24874	4.43551	4.07933	4.37918	3.80919	4.10436	4.35911	4.15755	3.99741	4.21214	4.16397	4.17357	4.38063	4.37758	4.39492	3.95488	4.23496	NA	NA	NA	NA	NA	NA	NA	NA	NA
1622943_s_at	CG2371	5	8.05857	7.44919	7.63114	7.63048	7.71388	7.55657	7.90284	7.8047	7.92166	7.99067	7.93854	7.77388	7.8604	7.74107	7.83007	7.50932	8.16325	7.69699	7.81775	7.66807	7.85087	7.79933	7.8375	7.66581	7.76362	7.77615	8.08646	8.38278	7.85517	7.7696	7.73912	7.65751	7.93299	7.92396	7.73329	7.92089	0.927162	0.585105	0.00569524	0.294666	0.381296	0.0974528	0.300849	0.384342	0.0917576
1622944_at	CG8735	5	8.84504	8.50056	8.72743	8.82971	8.80777	8.75827	8.77192	8.84838	8.88673	8.62058	8.85493	8.9898	8.85412	8.94869	8.72742	8.65469	8.93014	8.59754	8.55793	8.57662	8.75313	8.5788	8.66495	8.74772	8.7104	8.75607	8.79454	9.17243	8.73606	8.87144	8.65502	8.71388	8.62592	8.81639	8.89232	8.97584	0.248896	0.364002	-0.0707823	0.663087	0.508406	0.0232656	0.170013	0.32582	0.094048
1622945_a_at	Aats-lys	5	10.3014	9.78736	9.86521	9.64862	9.88142	9.68967	10.1591	10.1067	10.3417	10.081	10.1108	9.98962	9.88344	10.141	9.81672	9.69929	10.0522	9.6227	9.98035	9.57959	10.1103	10.0796	9.8472	10.0812	9.88735	9.70701	10.1015	10.3267	9.86108	10.2631	10.025	9.96769	9.99453	10.2097	10.2748	10.0585	0.241731	0.361357	-0.0890892	0.542799	0.469754	0.0595363	0.14901	0.312886	0.148626
1622946_at	CG6908	5	10.9015	10.8047	11.368	11.1372	11.2028	10.9465	11.5501	11.376	10.9499	11.3614	11.3442	10.6616	10.7439	10.6733	11.3709	11.5754	10.551	11.1607	11.3992	11.8124	11.4716	11.498	11.5149	11.2303	11.1033	11.652	11.1154	11.0778	11.0529	11.6565	11.2326	11.2792	11.5512	11.385	11.1315	11.6409	0.281929	0.376947	0.116467	0.187284	0.335096	0.189532	0.60462	0.490095	0.0730652
1622947_s_at	porin	5	12.6119	12.6189	12.6207	12.7165	12.8138	12.6183	12.8809	12.7836	12.8645	12.8188	12.8535	12.8552	12.7584	12.5967	12.7727	12.6932	12.9092	12.6996	12.8364	12.7501	12.7303	12.9236	12.8566	12.791	12.7569	12.6833	12.7879	12.8488	12.7875	12.6222	12.6933	12.7743	12.751	12.8152	12.7018	12.7377	0.426608	0.430407	0.0217785	0.818646	0.555981	-0.00806244	0.306305	0.386112	-0.0298409
1622948_at	CG17721	5	8.75808	8.43939	8.56512	8.55555	8.54715	8.5407	8.68383	8.58254	8.71415	8.57816	8.62397	8.90588	8.50496	8.64507	8.53226	8.45531	8.84784	8.57299	8.74901	8.51211	8.52807	8.61462	8.58993	9.10838	8.51907	8.57189	8.75617	8.93955	8.78033	8.74125	8.73051	8.59855	8.56566	8.75835	8.75139	9.09686	0.774851	0.543484	0.0138356	0.0475246	0.193362	0.109589	0.0575016	0.212237	0.0957535
1622949_at	peb	5	9.12317	9.3231	8.93356	9.18953	9.38908	9.34947	9.38047	9.52126	9.37116	9.34144	9.24487	9.47776	9.08336	9.41756	9.21499	9.10374	9.49436	9.33721	9.52826	9.19592	9.37206	9.55659	9.40667	9.58041	9.23956	9.15146	9.29381	9.1259	9.12714	9.22518	9.32707	9.39353	9.50052	9.31684	9.44687	9.50462	0.270352	0.37138	0.0538544	0.99023	0.600153	0.000634703	0.340235	0.399102	-0.0532197
1622950_a_at	CG10069	5	10.167	10.083	9.90148	10.2236	10.2764	10.1796	10.4196	10.2815	10.2513	10.4382	10.3879	10.2546	10.3838	10.2636	10.2819	10.0526	10.3937	10.3377	10.3839	10.2992	10.1652	10.3891	10.398	10.5734	10.3619	10.1852	10.5326	10.4202	10.2156	10.2581	10.274	10.2295	10.5299	10.3646	10.2646	10.1025	0.0972552	0.267273	0.088147	0.293795	0.38076	0.0728779	0.829133	0.558681	-0.0152691
1622951_at	---	5	3.48573	3.44973	3.62625	3.34308	3.19605	3.69314	3.58974	3.39071	3.28985	3.56848	3.55975	3.5415	3.52583	3.61234	3.34373	3.30101	3.32402	3.54458	3.38839	3.52423	3.31899	3.6494	3.56837	3.42936	3.54668	3.45648	3.37962	3.4368	3.40152	3.3457	3.42559	3.42377	3.75202	3.40403	3.37126	3.53655	NA	NA	NA	NA	NA	NA	NA	NA	NA
1622952_at	IM18	5	6.39869	5.69959	5.85067	6.53951	6.39494	6.49758	5.89914	6.43759	5.96674	5.93232	6.3079	6.39749	5.48059	5.97015	5.82403	5.83908	5.78793	5.91752	5.49583	6.57799	6.25927	6.00884	6.09864	5.82886	6.88034	6.47918	6.20969	6.07975	5.52609	6.37754	6.61478	6.51413	6.0832	5.69112	6.97603	6.44806	0.0453605	0.189279	-0.269453	0.390685	0.417461	0.129812	0.0288616	0.149728	0.399266
1622953_at	---	5	3.79039	3.90354	3.70454	3.6321	3.96745	3.485	3.73652	3.47586	3.91297	3.56065	3.50135	3.5795	3.61895	3.54522	3.67824	3.95061	3.72361	3.66274	3.82305	3.684	3.89661	3.4381	3.76797	3.62538	3.37051	3.66441	3.61659	3.67618	3.51795	3.82424	3.77205	3.84688	3.55097	3.75869	3.68962	3.99521	NA	NA	NA	NA	NA	NA	NA	NA	NA
1622954_at	---	5	4.31808	4.59874	4.46139	4.31712	4.10214	4.23581	4.42599	4.27053	4.4649	4.0592	4.2297	4.43483	4.43147	4.40821	4.14943	4.16659	4.25331	4.22919	4.23014	4.36837	4.63006	4.51746	4.39015	4.13752	4.26417	4.14756	4.52423	4.30565	4.2536	4.23177	4.46876	4.36408	4.59219	4.513	4.41685	4.40515	NA	NA	NA	NA	NA	NA	NA	NA	NA
1622955_at	---	5	3.81652	3.72147	3.91289	3.92904	4.16266	3.96747	4.10815	4.16426	3.85891	4.00602	4.21441	3.95557	4.07058	3.78814	3.81835	3.58757	3.83598	3.93289	3.70251	3.93475	4.30968	4.01196	3.87761	3.99013	3.93646	4.01745	4.22928	4.21922	3.8116	3.8727	4.00319	3.72342	3.95052	3.97748	3.59999	4.20238	NA	NA	NA	NA	NA	NA	NA	NA	NA
1622956_at	CG31542	5	3.79166	3.7053	3.84706	3.86605	3.5231	3.96382	4.1473	3.82169	3.96939	3.64771	3.53303	4.23753	3.51965	3.51903	3.75615	3.68206	3.94882	3.63164	3.98212	3.77955	4.02419	3.87331	3.91496	4.02854	3.8001	3.65824	3.89121	3.68587	3.81652	3.74789	3.92702	3.98868	3.72682	4.05348	3.92993	4.13752	NA	NA	NA	NA	NA	NA	NA	NA	NA
1622957_s_at	Drep-3	5	6.70489	7.18276	7.25587	7.16808	6.57381	7.09322	6.22793	6.73033	6.28802	6.50459	6.45122	6.2406	6.76472	6.78069	7.24269	7.17431	5.85711	7.37119	6.78036	7.14841	6.59355	6.29717	6.61152	6.57794	6.94332	7.20388	6.43182	5.55978	7.0741	6.94195	6.78912	6.7558	6.39082	6.19181	6.26581	6.1602	0.550202	0.472574	0.06486	0.419073	0.427866	-0.142742	0.314608	0.389263	-0.207602
1622958_at	CG30288	5	3.40419	3.09815	3.26768	3.24452	3.1531	3.2314	3.29536	3.27598	3.13025	3.12134	3.17519	3.38427	3.26719	3.24512	3.24659	3.57477	3.13964	3.24404	3.27665	3.40713	3.36421	3.09361	3.19284	3.21742	3.07975	3.19972	3.22394	3.25305	3.33412	3.15188	3.22213	3.16381	3.13215	3.19196	3.32079	3.20375	NA	NA	NA	NA	NA	NA	NA	NA	NA
1622959_at	CG42600	5	9.62659	8.99306	8.75378	8.63008	9.25163	8.6456	9.68821	9.39652	9.76259	9.53326	9.82013	9.32999	9.13664	9.38937	8.68057	8.28659	9.52366	8.60374	9.12338	8.40511	9.37359	9.61165	9.32662	9.37013	9.20964	8.65082	9.58453	9.78698	8.92012	9.40177	9.2642	9.30992	9.2944	9.65756	9.53063	9.41326	0.0855398	0.252936	-0.216698	0.766924	0.540551	0.0493664	0.184493	0.334275	0.266064
1622961_at	CG40162	5	3.99018	3.89197	3.80683	3.87614	3.6429	3.87301	3.84814	3.98082	4.19113	3.80403	4.1151	3.93363	3.84463	3.99072	3.82768	4.02882	3.9628	3.84048	3.88151	3.84908	3.90882	3.7729	3.95494	4.01328	3.87941	3.67658	3.57158	4.12639	3.94754	3.89402	3.89349	3.9576	4.07087	3.93189	4.02235	3.92856	NA	NA	NA	NA	NA	NA	NA	NA	NA
1622962_a_at	CG17221	5	8.32105	8.76906	8.92797	8.83484	8.46062	8.4421	8.34203	8.63418	8.327	8.20955	8.43693	8.20779	8.45782	8.58375	8.65615	8.75817	8.19778	8.71417	8.278	8.79839	8.33577	8.44965	8.487	8.5192	8.45868	8.8687	8.24629	8.11951	8.58759	8.54262	8.46351	8.42741	8.17721	8.14122	8.09656	8.19502	0.655998	0.506051	0.0268938	0.160519	0.320748	-0.1324	0.106509	0.276974	-0.159293
1622963_at	---	5	3.32746	3.7706	3.674	3.49986	3.65444	3.57192	3.56856	3.50891	3.85485	3.46106	3.4736	3.66334	3.58167	3.59648	3.34173	3.6072	3.41368	3.46343	3.46655	3.5523	3.49577	3.713	3.59921	3.73987	3.54419	3.46839	3.52164	3.55827	3.52929	3.40147	3.55714	3.52388	3.64695	3.58615	3.63766	3.47569	NA	NA	NA	NA	NA	NA	NA	NA	NA
1622964_at	CG34345	5	4.44528	4.20773	4.46512	4.34121	4.51505	4.41987	4.33671	4.11587	4.4652	4.40704	4.13475	4.67909	4.38723	4.51493	4.4112	4.33824	4.21871	4.26239	4.12148	4.43805	4.65465	4.21271	4.30448	4.36797	4.41198	4.23358	4.38921	4.48903	4.31591	4.28421	4.27055	4.12939	4.23383	4.34752	4.21543	4.79591	NA	NA	NA	NA	NA	NA	NA	NA	NA
1622965_s_at	---	5	3.50002	3.60573	3.62051	3.36406	3.58587	3.4067	3.4953	3.51358	3.89364	3.42097	3.51691	3.5679	3.53299	3.56733	3.50888	3.39739	3.55618	3.47634	3.47133	3.50123	3.69561	3.67618	3.40325	3.39194	3.39276	3.41945	3.60487	3.51953	3.59207	3.37804	3.45727	3.463	3.47378	3.71709	3.55991	3.76054	NA	NA	NA	NA	NA	NA	NA	NA	NA
1622966_at	RpS28a	5	5.48033	5.19039	5.40025	5.37379	5.47411	5.46518	5.41153	5.49138	5.72172	5.35202	5.52976	5.64886	5.46052	5.11414	5.28686	5.21019	5.3951	5.52018	5.56779	5.45365	5.66878	5.72531	5.54572	5.37635	5.45383	5.46661	5.47926	5.50747	5.18316	5.49919	5.511	5.73845	5.39646	5.8049	5.60049	5.87725	NA	NA	NA	NA	NA	NA	NA	NA	NA
1622967_at	---	5	5.53285	5.55094	5.39326	5.26612	5.42981	5.50493	5.33529	5.37687	5.54217	5.36923	5.30596	5.55794	5.37484	5.58679	5.47376	5.52563	5.35469	5.321	5.37106	5.42644	5.76975	5.526	5.54224	5.25836	5.44267	5.41237	5.37438	5.64518	5.31057	5.55719	5.52634	5.5676	5.45888	5.36486	5.75494	5.75243	NA	NA	NA	NA	NA	NA	NA	NA	NA
1622968_at	p115	5	8.51455	8.62212	8.63775	8.72058	8.63293	8.67616	8.64872	8.75099	8.68523	8.61948	8.61841	8.63296	8.48705	8.64814	8.68548	8.56033	8.60516	8.45666	8.57158	8.52781	8.53739	8.60357	8.67509	8.81893	8.61659	8.53231	8.48386	8.77066	8.41333	8.50313	8.57265	8.53832	8.47548	8.54688	8.62828	8.49458	NA	NA	NA	NA	NA	NA	NA	NA	NA
1622969_at	CG30484	5	3.16071	3.29874	3.1909	3.67349	3.31211	3.42239	3.52398	3.36349	3.44548	3.19124	3.51059	3.36941	3.42852	3.74021	3.22416	3.37997	3.32213	3.47484	3.399	3.64616	3.51587	3.47068	3.49715	3.59537	3.56125	3.26514	3.25481	3.35647	3.54823	3.29772	3.49409	3.27081	3.33393	3.39394	3.53393	3.80127	NA	NA	NA	NA	NA	NA	NA	NA	NA
1622970_at	form3	5	8.46661	9.14699	9.20848	9.18524	8.64932	8.97899	8.49137	8.53041	8.27833	8.35731	8.40566	8.62179	8.75895	8.81116	9.07825	9.0606	8.16139	9.12502	8.85059	9.12882	8.72596	8.55238	8.68797	8.7247	8.83328	9.25063	8.19649	7.80029	8.95501	8.721	8.93604	8.63146	8.47278	8.33816	8.555	8.40905	0.255945	0.366186	0.112108	0.541083	0.469279	-0.101777	0.202697	0.34272	-0.213885
1622971_at	CG15087	5	8.07465	7.78368	7.75993	7.86348	7.81939	7.84829	7.74139	7.88861	7.96545	8.05746	8.05636	8.03992	8.12953	7.9667	7.97616	7.57613	8.20357	7.90588	7.97129	7.75886	7.70199	7.95945	7.92851	8.01921	7.9227	7.95055	8.12714	8.33392	7.82511	7.97945	7.81395	7.95577	7.95136	7.95971	7.9409	7.92013	0.788522	0.547376	0.0165562	0.272711	0.37253	0.0651733	0.567063	0.477989	0.0486171
1622972_at	---	5	4.8058	4.88183	4.91407	4.58199	5.10975	4.74092	4.92136	4.76968	4.98593	4.75122	4.78173	4.68517	4.63394	4.4689	4.72765	5.23763	4.78952	4.76717	4.83063	4.72088	4.9514	4.92925	5.16659	4.95234	4.78822	4.83501	4.85343	4.85767	4.76109	4.92463	4.899	5.21071	4.92264	4.90502	4.87035	5.08522	NA	NA	NA	NA	NA	NA	NA	NA	NA
1622973_at	CG8031	5	9.52734	9.55823	9.32878	9.5659	9.55313	9.50073	9.68035	9.53278	9.62693	9.53126	9.468	9.71276	9.281	9.62158	9.44126	9.45002	9.63836	9.49554	9.75423	9.50775	9.54824	9.57709	9.49994	9.78743	9.4087	9.491	9.50611	9.50607	9.45609	9.39335	9.50687	9.50752	9.43346	9.46197	9.54687	9.71178	0.964853	0.594137	0.00135359	0.0943477	0.262933	-0.0547008	0.1157	0.285081	-0.0560544
1622974_at	CG4000	5	10.5384	11.2898	11.1793	11.4107	10.7966	10.9812	10.533	10.661	10.4642	10.6184	10.4876	10.5189	10.9649	10.8133	11.4527	11.4518	10.5606	11.563	11.2959	11.4033	10.8965	10.7018	11.0723	10.6891	11.0951	11.0473	10.388	9.73602	11.1543	10.6884	10.9899	10.7308	10.4498	10.2944	10.7362	10.6281	0.0272136	0.14493	0.282162	0.487055	0.450971	-0.128398	0.0433706	0.184934	-0.41056
1622975_at	CG13477	5	4.2036	4.34112	4.52743	4.15351	4.39917	4.38786	4.17946	4.16471	4.19784	4.38118	4.2657	4.01088	4.00675	4.18584	4.04414	4.10894	4.2995	4.08129	3.87775	4.25107	4.11757	4.38573	4.01381	4.22192	4.18095	3.98464	4.142	4.2306	4.19236	4.44112	4.14605	4.40132	4.07183	4.24736	4.10877	4.48647	NA	NA	NA	NA	NA	NA	NA	NA	NA
1622976_at	mod(mdg4)	5	6.15121	6.04956	5.59681	6.51845	6.03965	5.8615	6.29975	5.99727	6.17288	6.73776	6.55018	6.10988	6.46082	5.81276	6.55775	5.80905	6.45597	6.15938	6.41011	6.09899	5.89067	6.44425	6.15509	6.64574	6.27524	6.46416	6.50196	6.45604	6.31383	6.10265	6.24132	5.92525	6.3097	6.40757	5.94793	5.71292	0.625316	0.49728	0.0679749	0.68791	0.515901	0.047805	0.874288	0.571013	-0.0201699
1622977_at	CG14635	5	3.64281	3.58323	3.63866	3.50823	3.73223	3.73455	3.78893	3.49226	3.51049	3.65288	3.79153	3.55346	3.5406	3.6693	3.38254	3.70947	3.71531	3.81023	3.45637	3.83573	4.2678	3.74818	3.46047	3.60039	3.66774	3.86433	3.52124	3.75746	3.48782	3.72048	3.68605	3.64801	3.65276	3.81278	3.79443	4.00002	NA	NA	NA	NA	NA	NA	NA	NA	NA
1622978_at	CG6434	5	3.04926	3.04253	3.33121	2.84413	2.88898	3.15441	3.04041	2.91139	2.97135	2.95627	2.94487	2.82453	3.1593	3.21418	3.01344	2.91331	2.82015	2.9297	3.0287	3.04036	2.9176	3.00726	3.19663	2.90578	2.99283	2.84569	3.08499	3.32868	3.01288	3.15937	3.04194	3.01335	3.02202	3.05884	3.14224	3.22507	NA	NA	NA	NA	NA	NA	NA	NA	NA
1622979_a_at	CG7188	5	11.6877	11.7916	12.0113	11.9528	11.7694	12.0313	11.8337	12.0953	11.8382	11.6615	11.7179	11.8471	11.6354	11.711	11.8446	11.9495	11.6613	11.8507	11.7985	11.8623	11.7655	11.7951	11.7347	11.9275	11.7283	11.8256	11.6706	11.8832	11.9223	11.7657	11.7725	11.7785	11.6392	11.624	11.8098	11.8269	0.084708	0.252051	-0.0584756	0.105652	0.276332	-0.0825879	0.54167	0.469299	-0.0241123
1622980_at	Prp19	5	9.74158	9.43146	9.30039	9.28796	9.4608	9.23311	9.43619	9.60299	9.72314	9.60512	9.76147	9.5543	9.50608	9.63816	9.49654	9.37704	9.68093	9.24585	9.25538	9.19645	9.63581	9.5673	9.45367	9.46472	9.40825	9.24394	9.62516	9.87481	9.3958	9.58941	9.44463	9.59275	9.49059	9.7156	9.63233	9.41737	0.405099	0.422397	-0.0517119	0.763467	0.539627	0.0243459	0.357896	0.405534	0.0760578
1622981_at	usp	5	9.22802	9.10905	8.99394	9.29646	9.15737	9.08841	9.19118	9.14982	9.1452	9.32869	9.53735	9.45142	9.39611	8.85823	9.32583	8.93776	9.44333	9.2202	9.2017	9.16062	9.19619	9.38083	9.26018	9.34573	9.18593	9.27601	9.34787	9.30151	9.28531	9.08673	9.17617	9.23555	9.37246	9.53523	9.07601	9.16433	0.948586	0.590366	0.00415031	0.647771	0.503974	0.0305162	0.680772	0.513937	0.0263659
1622982_at	p38b	5	10.0551	9.91994	9.81296	9.86075	9.81407	9.91034	10.0329	9.89918	9.98483	10.0046	9.93238	10.0578	9.93315	10.0557	9.97355	9.89817	10.008	9.92697	9.98677	9.89751	10.0782	10.1517	9.94314	10.162	9.87286	9.77026	10.0064	10.1299	9.91601	10.111	9.96312	9.96422	10.0362	10.0044	10.1637	10.0178	0.0467482	0.191918	0.0608363	0.221268	0.351944	0.055918	0.916858	0.582598	-0.00491836
1622983_a_at	Nup154	5	9.40947	8.76041	8.60772	8.53498	8.94867	8.37343	9.03608	8.98105	9.25662	9.40375	9.43194	8.9034	9.00019	8.92657	8.63803	8.47029	9.41055	8.62611	8.94203	8.53994	9.00357	9.15274	9.00725	9.08378	8.91066	8.68867	9.32148	9.53459	8.82561	9.06537	8.89494	8.95379	9.03762	9.32664	9.19422	8.94932	0.425987	0.430197	-0.0705382	0.518687	0.46062	0.0879498	0.240743	0.360808	0.158488
1622984_at	Sod2	5	11.7393	11.8141	11.9097	11.7615	11.7639	11.8425	11.9203	11.593	11.7992	11.7249	11.6913	11.7345	11.8554	11.8016	11.755	11.767	11.7809	11.9879	11.9633	11.8342	11.8005	11.9737	11.7528	11.931	11.774	11.9355	11.6689	11.5689	11.8164	11.8086	11.7498	11.7212	11.7597	11.7558	11.6666	11.7581	0.0488289	0.19612	0.0757641	0.467262	0.444391	-0.0258912	0.00711033	0.0668494	-0.101655
1622985_at	CG14325	5	3.84058	3.98221	4.28454	3.90801	4.59002	4.03203	4.29253	4.03292	4.07903	4.05105	4.13853	3.93799	4.01199	4.07885	3.9519	4.19969	4.15758	4.13577	4.12612	4.21857	4.13311	4.13151	4.10186	3.9483	4.15342	4.0821	4.00182	4.03767	4.1018	4.14585	4.0237	3.91853	4.08556	4.21107	3.89639	3.79528	NA	NA	NA	NA	NA	NA	NA	NA	NA
1622986_at	---	5	3.84308	3.97031	4.10769	3.57057	4.20527	3.97218	4.08759	3.9455	3.94395	4.13763	4.13539	4.0749	4.00455	4.20051	3.79894	4.13335	3.89768	4.00003	4.03788	3.88567	3.87996	4.0282	4.09528	4.0004	4.20608	3.837	4.00757	4.08954	4.0155	4.21533	3.83134	4.20346	4.10155	4.25579	4.09248	4.43929	NA	NA	NA	NA	NA	NA	NA	NA	NA
1622987_at	Ir7g	5	3.93145	3.89787	4.01259	3.82438	3.94777	3.87313	4.07736	3.93104	3.83442	3.83452	3.97823	3.79097	4.0334	3.86057	3.75182	4.07694	3.82687	3.77743	3.88534	3.87027	3.95464	3.94305	4.03081	3.65515	3.89839	3.81291	3.8748	3.77186	3.76498	4.04435	3.97753	3.92708	3.97098	3.74409	3.91661	4.09559	NA	NA	NA	NA	NA	NA	NA	NA	NA
1622988_at	---	5	3.4344	3.78058	3.71816	3.80677	3.89341	3.71309	3.9408	3.58568	3.83799	3.94542	3.69419	3.85961	3.79422	3.74092	3.58223	3.61073	3.72939	3.64162	3.70374	3.74561	3.81755	3.69972	3.71652	3.59953	3.96191	4.05795	3.85824	3.94249	3.70471	3.68992	3.92217	3.80384	3.85646	3.87123	3.83236	3.82697	NA	NA	NA	NA	NA	NA	NA	NA	NA
1622989_at	CG5611	5	6.98703	6.87216	6.85539	6.66688	6.6954	6.83926	6.76594	6.87059	6.98205	6.96648	6.9159	6.95916	6.83612	6.70736	6.84797	6.69651	6.75103	6.9192	6.99645	6.78618	6.70262	7.04199	6.88105	7.12188	6.80951	6.81159	6.98511	7.00109	6.878	6.84304	6.83079	6.95753	6.88084	6.91795	7.09848	6.98188	NA	NA	NA	NA	NA	NA	NA	NA	NA
1622990_at	CG5381	5	9.87996	10.3344	10.4946	10.5629	10.1098	10.5256	10.1182	10.179	9.73761	10.0005	9.99379	10.3039	10.1715	10.2443	10.4737	10.4733	10.1195	10.3798	10.1827	10.4938	10.0622	10.0329	10.0843	10.3951	10.1159	10.4233	9.89082	9.75558	10.3323	10.1495	10.1947	10.134	9.93204	9.92323	9.94562	9.90943	0.146241	0.311549	0.0727305	0.221524	0.351983	-0.127833	0.0350274	0.165215	-0.200564
1622991_s_at	Ret	5	4.50166	3.68853	4.09771	4.33155	4.46013	4.21446	4.34908	4.38818	4.25459	4.47287	4.78235	4.31639	4.4049	4.18074	4.35738	3.98542	4.59179	4.16592	4.43804	4.05346	4.07213	4.36325	4.33374	4.20712	4.43412	4.27319	4.61409	4.88327	4.32432	4.1339	4.14002	4.0318	4.43455	4.46695	4.24055	3.96901	NA	NA	NA	NA	NA	NA	NA	NA	NA
1622992_at	twe	5	7.62472	6.1913	6.59501	7.18285	7.4334	6.22699	7.13473	7.46659	7.22981	8.28067	8.21715	7.85162	7.88503	6.95304	7.34695	5.99555	8.18586	6.26193	6.78785	6.5367	6.9492	7.56069	7.27197	7.15594	7.06239	6.74516	8.13163	8.51339	6.97038	6.60759	6.85314	6.96045	7.71143	8.2085	7.3398	7.03607	0.325873	0.393509	-0.212009	0.804389	0.551962	0.0587605	0.336832	0.397973	0.27077
1622993_at	---	5	3.88162	3.94335	3.88389	3.85312	3.70579	3.61925	3.93642	3.72807	4.09424	3.89334	3.73301	3.92681	3.81474	3.97773	3.8615	3.57833	4.05706	3.65596	3.78495	3.77987	3.72258	4.01494	3.84133	3.81279	3.73196	3.81932	3.8958	4.10953	3.43836	3.56873	3.68723	4.06761	4.03135	3.87668	4.12319	4.02597	NA	NA	NA	NA	NA	NA	NA	NA	NA
1622994_at	---	5	4.5399	4.67555	4.58829	4.38025	4.57954	4.76746	4.68888	4.56363	4.70515	4.51508	4.53346	4.75562	4.50337	4.53518	4.36404	4.38858	4.42129	4.4743	4.4142	4.64986	4.90977	4.57057	4.56717	4.45521	4.48737	4.50159	4.66172	4.32401	4.48427	4.62531	4.77551	4.44996	4.63104	4.72092	4.62577	4.77258	NA	NA	NA	NA	NA	NA	NA	NA	NA
1622995_at	mRpS17	5	9.68718	9.40216	9.43024	9.43819	9.55477	9.56155	9.77464	9.5604	9.73277	9.76268	9.62729	9.65906	9.54829	9.57494	9.53892	9.54122	9.76336	9.63876	9.77542	9.59346	9.69229	9.8056	9.63825	9.78212	9.52581	9.4877	9.63789	9.71431	9.65367	9.68505	9.50286	9.61241	9.67463	9.77408	9.66965	9.87239	0.0569614	0.211515	0.058475	0.280533	0.376695	0.0516275	0.84094	0.561917	-0.00684755
1622996_at	RN-tre	5	6.84694	7.36186	7.12113	7.25039	7.21953	7.27337	6.86407	7.06272	6.69618	6.96425	6.62596	6.8006	7.01738	6.88569	7.08229	7.25535	6.8897	7.48502	7.3808	7.24971	6.69518	6.92987	7.03003	7.1096	7.10504	7.31773	6.98796	6.48411	7.21257	7.14226	7.21449	7.19068	6.95107	6.90128	6.6346	6.9362	0.3717	0.410076	0.0769712	0.992997	0.600537	-0.000748411	0.438017	0.434101	-0.0777196
1622997_at	CG34367	5	3.98518	4.53256	4.66391	4.88055	4.56267	4.83306	4.21396	4.07915	4.27042	4.13857	4.16164	4.3064	4.38537	4.73233	4.59711	4.73645	4.17474	4.47622	4.51818	4.62391	4.46023	4.21985	4.51143	4.3595	4.42145	4.42888	4.48187	3.99707	4.50765	4.51952	4.46551	4.10734	4.07325	4.43265	4.23486	4.39364	NA	NA	NA	NA	NA	NA	NA	NA	NA
1622998_a_at	pfk	5	8.65702	7.84871	8.01678	7.98299	8.0946	7.67125	8.08811	8.25403	8.32118	8.32223	8.45125	8.17089	8.34145	8.30708	8.10042	7.81938	8.63344	7.77515	7.91411	7.63596	8.16581	8.23102	8.02366	8.15639	8.09789	7.73859	8.45621	8.89685	8.10899	8.25015	8.18669	8.12175	8.21642	8.45736	8.39925	8.03997	0.51588	0.459613	-0.0645984	0.435412	0.433324	0.0909222	0.273125	0.372646	0.155521
1622999_at	2014-09-01	5	9.99841	9.42418	9.48523	9.48034	9.57598	9.41735	9.66082	9.60428	9.77995	9.96404	9.95102	9.71187	9.77203	9.58451	9.56585	9.09435	9.86711	9.22612	9.46543	9.18934	9.50743	9.69408	9.72544	9.6466	9.68198	9.34407	9.97222	10.2203	9.53655	9.6587	9.56109	9.58786	9.73769	9.86749	9.62653	9.55412	0.0439612	0.186127	-0.14293	0.792141	0.548594	0.0245968	0.171109	0.32646	0.167527
1623001_at	---	5	4.3183	4.70839	4.68367	4.27388	4.5386	4.60763	4.64635	4.35691	4.71621	4.4842	4.4474	4.60416	4.2448	4.78481	4.6056	4.73894	4.57103	4.79507	4.51942	4.44507	4.22448	4.70196	4.54441	4.50817	4.45492	4.53341	4.84679	4.3389	4.3623	4.44707	4.59095	4.6338	4.59216	4.56713	4.85684	4.3639	NA	NA	NA	NA	NA	NA	NA	NA	NA
1623002_at	CG31404	5	4.35058	4.92473	4.73808	4.47563	4.56313	4.75514	4.68658	4.47799	4.63393	4.58832	4.22716	4.87343	4.56644	4.935	4.40872	4.43359	4.50192	4.54135	4.58044	4.6044	4.80816	4.91493	4.89122	4.37578	4.68572	4.61341	4.55346	4.68579	4.51801	4.61407	4.64888	4.58433	4.46362	4.66882	4.76266	4.35304	NA	NA	NA	NA	NA	NA	NA	NA	NA
1623003_at	---	5	3.80576	3.8601	3.55171	3.73401	3.58853	3.59841	3.71803	3.92659	3.74518	3.66695	3.3428	3.67294	3.3975	3.6995	3.52638	3.61233	3.5932	3.7467	3.62595	3.91984	3.53977	3.88073	3.57057	3.7434	3.62746	3.89742	3.72841	3.69122	3.69437	3.81184	3.55938	3.60571	3.48714	3.58523	3.84715	3.77699	NA	NA	NA	NA	NA	NA	NA	NA	NA
1623004_a_at	CG18449	5	4.41926	4.25698	4.11289	3.87186	4.14379	4.31367	4.08474	3.91501	4.36852	4.13022	4.1028	4.09461	4.11914	3.88866	3.97704	4.16969	3.89074	4.02714	4.16851	4.07994	4.25211	4.26851	4.26187	4.20535	4.0799	3.99681	3.93187	4.19859	4.11071	3.79123	4.00503	3.94611	4.32568	4.16107	3.87202	4.27398	NA	NA	NA	NA	NA	NA	NA	NA	NA
1623005_at	---	5	3.33515	3.37584	3.25076	3.15707	3.17479	3.28226	3.40693	3.28169	3.33047	3.24108	3.23696	3.19388	3.22832	3.09027	3.20874	3.41392	3.05538	3.29899	3.28204	3.20869	3.28109	3.28824	3.21522	3.15992	3.29098	3.1811	3.33575	3.26606	3.09763	3.07529	3.39356	3.05208	3.25365	3.26155	3.01319	3.44931	NA	NA	NA	NA	NA	NA	NA	NA	NA
1623006_at	SerT	5	5.21631	6.1075	5.74969	5.65726	5.56913	5.89008	5.11205	5.28106	4.93238	5.30185	5.27033	5.20176	5.69147	5.44394	5.83387	5.82451	5.32307	6.09627	5.77617	6.24883	5.29116	5.43418	5.64171	5.82146	5.70001	6.28231	5.39539	4.96023	5.78562	5.68573	5.78466	5.43195	5.27542	5.27527	5.05028	5.28583	0.0587562	0.214085	0.261435	0.644372	0.503054	0.051941	0.180117	0.331148	-0.209494
1623007_a_at	jog	5	5.81017	4.85755	5.02251	4.93395	5.08422	4.86465	4.93415	5.29594	5.37954	5.15891	5.57503	5.41188	5.40864	5.29934	4.88076	4.68043	5.35069	4.57418	4.71148	4.84092	4.89228	5.23016	5.1259	5.16903	5.07599	4.83619	5.6121	5.73325	5.0678	5.15009	5.1055	5.19187	5.37807	5.66654	6.14037	4.86942	0.058655	0.21407	-0.180388	0.367618	0.408284	0.12489	0.071202	0.234111	0.305279
1623008_at	CG5565 /// DsimCG5565	5	3.43072	3.75528	3.74767	3.60357	3.79111	3.56868	3.74337	3.75274	3.7505	3.70469	3.69698	3.52915	3.66541	3.72721	3.63936	3.81698	3.47768	3.62222	3.58277	3.68709	3.79331	3.74616	3.66376	3.58924	3.55601	3.70021	3.79971	3.56334	3.5792	3.31046	3.77713	3.50368	3.92054	3.65789	3.75972	3.67424	NA	NA	NA	NA	NA	NA	NA	NA	NA
1623009_at	cyp33	5	8.8228	8.69377	8.58475	8.66974	8.79832	8.73424	8.90731	8.85509	8.9575	8.8818	8.85296	8.81152	8.66948	8.69681	8.65721	8.6236	8.94083	8.77833	8.91045	8.76472	8.79266	8.93142	8.7758	8.82862	8.73417	8.68788	8.95953	8.88049	8.73772	8.81287	8.67864	8.81908	8.81586	8.87902	8.85978	8.96634	0.54499	0.470761	-0.0166557	0.653458	0.505552	0.0217998	0.415254	0.426464	0.0384555
1623010_at	Or30a	5	3.58552	3.42235	3.36279	3.20354	3.42793	3.23376	3.58319	3.30557	3.5435	3.40283	3.38744	3.45903	3.55232	3.27698	3.33489	3.48018	3.44368	3.40041	3.38731	3.32823	3.43402	3.40612	3.45505	3.14951	3.42161	3.46965	3.37717	3.35829	3.27238	3.45661	3.59518	3.41444	3.47707	3.39429	3.45325	3.59552	NA	NA	NA	NA	NA	NA	NA	NA	NA
1623011_at	---	5	4.09666	4.14439	4.15978	3.92068	3.93411	3.81801	4.08594	3.95848	4.18666	4.01677	4.04155	4.19748	3.74372	4.24276	3.70086	4.24363	4.07602	3.98518	3.999	3.84581	4.10135	4.11648	4.04167	4.04121	4.02903	3.76004	4.0141	3.80003	4.04331	3.94387	4.22007	4.07861	3.91268	4.05898	4.09537	4.25701	NA	NA	NA	NA	NA	NA	NA	NA	NA
1623012_at	mRpL55	5	9.97364	9.90996	10.0008	9.88756	9.97172	10.1258	10.1088	9.98417	10.1746	10.1288	10.0949	9.90521	9.99439	9.98343	9.8807	9.92144	10.0165	10.1226	10.2024	9.95044	10.1328	10.2479	9.93896	10.1117	10.0372	9.95625	9.96392	9.95736	10.0498	10.1282	9.87298	9.96285	10.0381	10.0285	9.85999	10.1535	0.51044	0.457745	0.0197721	0.605452	0.49039	-0.0214428	0.268809	0.370948	-0.0412149
1623013_s_at	CG3907	5	9.99561	10.3129	10.2495	10.3695	10.2139	10.4828	10.2003	10.1913	9.92457	9.9917	9.81221	10.0132	10.1119	10.1967	10.2696	10.2521	9.98792	10.3919	10.1295	10.3153	10.142	10.1447	10.0341	10.2081	10.1894	10.3194	9.95485	9.69305	10.2566	10.2462	10.3025	10.0812	10.0059	9.96798	9.95369	9.85599	0.443637	0.435717	0.0355147	0.289848	0.379634	-0.077561	0.131999	0.300703	-0.113076
1623014_at	CG18537	5	5.79963	6.49378	6.01578	6.30526	5.60552	6.1089	5.84818	5.88479	5.41818	5.7746	5.68875	5.51285	5.65817	5.8134	6.23451	6.63256	5.57769	6.51842	6.25536	6.3783	5.35845	6.17753	5.81479	6.07532	5.85904	6.36805	5.44408	5.01883	6.04474	6.1143	6.292	5.79003	5.654	5.32322	5.81377	5.95592	0.12336	0.293406	0.169857	0.665897	0.509353	-0.0648538	0.228722	0.355567	-0.234711
1623015_at	CG7671	5	8.54004	7.66386	7.78298	7.90425	8.37301	7.97409	8.33364	8.23436	8.45275	8.56861	8.50109	8.4138	8.41526	8.21245	8.23096	7.78656	8.67128	7.8785	8.24895	7.79794	8.27272	8.54029	8.28559	8.40479	8.15607	8.00932	8.677	8.9058	8.31619	8.2774	8.05382	8.40274	8.4852	8.64554	8.51975	8.42527	0.997792	0.601652	0.000234627	0.166757	0.323739	0.177636	0.175679	0.328545	0.177401
1623016_at	CG1299	5	9.08721	9.66985	9.77344	9.88605	9.26554	9.82658	9.13065	9.253	9.14152	9.07505	8.9777	9.29643	9.30969	9.30425	9.67032	9.63085	9.06648	9.80102	9.29037	9.61716	9.24394	9.20039	9.17973	9.26416	9.36973	9.61295	8.82059	8.89565	9.32463	9.26538	9.247	9.12212	8.92406	8.84209	9.12012	8.84326	0.800544	0.551116	0.0162797	0.0616612	0.21841	-0.249618	0.0309083	0.154644	-0.265898
1623017_at	CG7149	5	8.5902	8.97523	8.96253	8.70814	8.64108	8.87322	8.7624	8.77612	8.23522	8.83943	8.51536	8.4741	8.60407	8.4394	8.93871	8.88023	8.38786	9.02251	8.88303	8.87933	8.51564	8.89874	8.71757	9.18406	8.81359	8.94043	8.5844	7.99201	8.52741	8.82821	8.79204	8.64484	8.63504	8.6069	8.41572	8.37067	0.353515	0.403833	0.0831748	0.239019	0.36025	-0.100149	0.142587	0.308688	-0.183323
1623019_a_at	Unc-89	5	8.04877	8.76346	8.77437	8.52691	7.90257	8.2741	7.4602	7.88057	7.50401	7.59776	7.95755	7.75311	8.34146	8.27865	8.6996	8.67989	7.75303	8.66641	8.24251	8.68607	8.13326	7.89194	8.3022	8.11891	8.23221	8.93056	7.51845	6.86496	8.19134	8.10315	8.21557	7.85508	7.73545	7.64389	7.68667	7.56305	0.0271431	0.144699	0.279212	0.430136	0.431495	-0.158584	0.0447481	0.187843	-0.437796
1623020_at	CG31937	5	10.4495	10.662	10.4653	10.286	10.138	10.3637	10.265	10.2039	10.2351	10.146	10.0862	10.1329	9.88781	10.2633	10.1942	10.5803	10.0489	10.0612	10.1342	10.3115	10.2428	10.3085	10.0321	10.1607	10.3508	10.405	10.0709	9.96043	9.96853	10.1673	10.1292	10.1949	9.80517	9.96347	10.0511	10.4143	0.185648	0.334587	-0.100672	0.0134327	0.0981143	-0.162699	0.489692	0.451354	-0.0620273
1623021_at	Prosbeta3	5	12.0815	11.8527	11.9656	11.8803	11.9767	11.9071	12.0169	11.9736	12.162	11.9943	12.0369	12.1243	11.9116	11.8814	11.9003	11.7771	12.0774	11.8617	11.9103	11.8683	12.0043	12.0231	11.9331	12.089	11.8514	11.8803	12.0636	12.1771	11.9447	11.9702	11.968	11.998	11.9691	12.0051	12.1592	12.1428	0.0238413	0.134379	-0.0611934	0.748413	0.534932	0.0131142	0.102027	0.272845	0.0743076
1623022_at	CG15820	5	6.80226	5.80477	5.80715	5.66315	6.52354	5.58189	6.66357	6.51691	6.81452	6.76187	6.79358	6.74457	6.66621	6.35815	6.04861	5.51429	6.84071	5.80835	6.5878	5.67975	6.62914	6.80604	6.44151	6.47113	6.53862	5.91501	6.80103	7.33248	6.43787	6.22068	6.58495	6.61339	6.47741	6.61641	6.68594	6.75402	0.630285	0.49868	-0.0521748	0.25161	0.365166	0.208335	0.193626	0.338334	0.260509
1623023_at	Slip1	5	9.6627	9.3044	9.18792	9.5621	9.63797	9.44056	9.57072	9.58982	9.49884	9.76348	9.87043	9.6551	9.74069	9.23254	9.64619	9.33803	9.88057	9.60051	9.48263	9.54798	9.52697	9.69283	9.60583	9.63601	9.5425	9.50228	9.80906	9.87487	9.69554	9.58284	9.68524	9.55902	9.7384	9.86689	9.55043	9.05594	0.792188	0.548594	0.0155623	0.517774	0.460383	0.0599152	0.60055	0.488904	0.0443529
1623024_at	---	5	3.91369	3.81375	3.91445	3.79845	3.89419	3.99462	3.8351	4.0283	4.06824	3.77897	3.95237	3.69348	3.78522	3.79658	3.98047	3.91914	3.73158	3.98388	3.73352	3.80388	4.11974	4.12409	4.19594	3.90689	3.82776	3.9539	3.95869	3.90052	3.52104	3.95311	3.79525	3.97623	3.85479	3.89692	3.9235	4.05812	NA	NA	NA	NA	NA	NA	NA	NA	NA
1623025_at	CG3457	5	6.9451	6.24211	6.35456	6.4244	6.61566	6.03533	7.04934	6.57674	6.83955	7.09718	7.20914	7.0574	7.23857	6.93877	6.2767	5.87906	7.35148	6.32374	6.96069	6.11662	6.72846	7.08826	6.74963	6.69389	6.6977	6.23041	7.2232	7.54349	6.64602	6.61388	6.66818	6.91688	6.93565	7.03813	6.90296	6.979	0.947846	0.590265	-0.00838821	0.259285	0.367371	0.162415	0.423321	0.42936	0.170803
1623026_a_at	CG7573	5	3.48302	3.26123	3.6713	3.26456	3.37392	3.32704	3.30534	3.4673	3.31914	3.31733	3.21296	3.36041	3.56563	3.47082	3.22124	3.54643	3.40923	3.29606	3.32871	3.1289	3.52855	3.56661	3.58403	3.46346	3.39222	3.24143	3.40299	3.56042	3.45869	3.40251	3.38742	3.49636	3.34627	3.26799	3.45588	3.3923	NA	NA	NA	NA	NA	NA	NA	NA	NA
1623028_at	CG14872	5	10.7403	10.8068	10.5696	10.9186	10.9745	10.8459	11.1474	11.0764	10.4077	11.1067	10.667	11.2039	10.9151	11.3075	11.0383	11.2808	10.8673	10.8268	11.413	11.2591	10.9216	11.1137	11.0953	11.16	11.2464	11.0419	11.0029	10.8434	10.8116	10.8063	11.0611	11.0378	10.9439	11.195	11.0867	11.5443	0.0054034	0.0568546	0.227789	0.0354124	0.166137	0.179676	0.51532	0.459489	-0.0481122
1623029_at	---	5	4.77865	4.55877	4.50147	4.32264	4.00007	4.34255	4.17558	4.0422	4.64093	4.17918	4.11301	4.56615	3.99713	4.31264	4.26288	4.42384	3.90706	3.88853	4.33842	4.17068	4.17675	4.14713	4.11219	4.76729	4.53999	4.35517	4.01444	4.19118	4.20248	4.61552	4.12321	4.42799	4.10172	4.14858	4.47867	3.90158	NA	NA	NA	NA	NA	NA	NA	NA	NA
1623030_at	CG11726	5	3.61664	3.50067	3.70556	3.53249	3.69343	3.57428	3.66508	3.55483	3.69831	3.68171	3.59897	3.5341	3.67752	3.71811	3.65511	3.68686	3.65543	3.70384	3.92298	3.64091	3.84023	3.53728	3.537	3.71503	3.51618	3.61491	3.65995	3.6575	3.52443	3.59184	3.77244	3.66323	3.86574	3.76709	3.89708	3.83294	NA	NA	NA	NA	NA	NA	NA	NA	NA
1623031_a_at	RecQ4	5	8.16153	6.9301	6.81239	6.84843	7.23837	6.51064	7.42549	7.43824	7.66647	7.94836	8.02585	7.52582	7.56735	7.67443	7.2724	6.38176	7.88838	6.47285	7.05175	6.63158	7.49804	7.58492	7.33346	7.41289	7.21562	6.7705	7.93257	8.33337	7.26967	7.57344	7.29752	7.56344	7.52738	7.95861	7.75777	7.40265	0.346729	0.400662	-0.146823	0.407144	0.423298	0.172571	0.18713	0.335096	0.319394
1623032_at	CG2336	5	4.26606	4.28207	4.061	4.12287	4.16952	4.52438	4.12506	4.22817	4.19998	4.02418	4.18973	4.2183	4.19922	4.33512	4.02532	4.22036	4.12366	4.1423	4.33428	4.09278	4.30464	4.19327	4.08482	4.07979	4.00153	3.94194	4.29132	4.07202	3.94651	3.98996	4.03852	4.40307	4.14546	4.41065	4.45508	4.12739	NA	NA	NA	NA	NA	NA	NA	NA	NA
1623033_at	---	5	4.02648	3.77195	4.23954	4.24917	4.08106	4.0795	3.96656	4.03718	4.10363	4.02705	3.86945	4.3747	4.24772	4.05131	3.89195	3.95047	4.04616	3.99812	4.04646	4.05788	4.03314	4.34469	3.98932	4.19971	4.0669	3.98347	4.02405	4.52671	4.00995	3.89897	4.0082	3.98348	3.92839	4.104	4.20013	4.09799	NA	NA	NA	NA	NA	NA	NA	NA	NA
1623034_at	CG7026	5	4.68609	4.55624	4.58429	4.45017	4.48031	4.38588	4.44622	4.38263	4.76048	4.45381	4.46948	4.55764	4.19419	4.52413	4.22544	4.57382	4.35467	4.5201	4.4683	4.41894	4.41382	4.68614	4.30055	4.43874	4.33438	4.58545	4.32716	4.33217	4.59437	4.56424	4.64013	4.66944	4.60617	4.52257	4.63684	4.77569	NA	NA	NA	NA	NA	NA	NA	NA	NA
1623035_at	NaPi-T	5	7.03391	6.83804	6.7464	7.64583	7.0708	7.10152	7.06787	7.13897	6.92913	7.57932	6.98779	6.87214	7.00741	6.51979	7.30487	7.24057	7.46773	7.18698	7.31684	7.40699	6.83833	7.20747	6.99338	7.27732	6.9516	7.01915	6.66546	6.97937	7.28883	6.86472	6.70737	6.99068	6.70487	6.80801	6.45012	6.46791	0.511836	0.458318	0.0629963	0.0137083	0.0990627	-0.259468	0.00757306	0.0692349	-0.322465
1623036_a_at	CG10249	5	9.28406	9.69713	9.46542	9.65128	9.32695	9.61928	9.46929	9.50853	8.77471	9.38689	9.24818	9.5091	9.65742	9.2324	9.71951	9.7796	9.21404	9.58198	9.7379	9.6798	8.98917	9.43808	9.432	9.57216	9.73194	9.87467	9.15523	8.92812	9.44217	9.21708	9.60632	9.21121	9.01078	9.22954	9.02321	9.00058	0.181638	0.33181	0.0911031	0.236518	0.359138	-0.12583	0.0945893	0.263149	-0.216933
1623037_a_at	CG5594	5	10.4671	10.7327	10.5683	10.6745	10.5353	10.6783	10.6132	10.6762	10.385	10.5093	10.6266	10.646	10.4729	10.5166	10.5886	10.6547	10.4004	10.484	10.5891	10.6845	10.5777	10.6364	10.6045	10.812	10.7243	10.6843	10.5067	10.2597	10.6052	10.5859	10.6584	10.7012	10.4452	10.4443	10.6385	10.5454	0.842975	0.562364	-0.0075878	0.57545	0.480832	-0.0261215	0.752582	0.536346	-0.0185337
1623038_at	---	5	4.21257	4.42435	4.12608	4.45366	4.35628	4.29974	4.51557	4.32974	4.41766	4.44967	4.33894	4.51348	4.08003	4.42557	4.09619	4.51151	4.36502	4.20592	4.3102	4.43528	4.53459	4.3503	4.35871	4.36806	4.22873	4.04665	4.24041	4.3575	4.23004	4.41624	4.33223	4.22398	4.32429	4.4379	4.39514	4.38773	NA	NA	NA	NA	NA	NA	NA	NA	NA
1623039_at	CG3409	5	9.87087	10.2807	10.1054	10.4912	10.1228	10.2508	9.85399	10.24	10.0211	9.89199	10.113	10.1631	10.1667	9.84019	10.4891	10.1872	10.1546	10.0042	9.87536	10.1037	10.1362	9.87829	10.1106	9.86816	10.0383	10.2174	10.0641	9.98343	10.3412	10.1305	10.0193	10.1715	9.907	10.1732	9.80683	9.56168	0.505038	0.456197	-0.0492247	0.326201	0.39353	-0.0825425	0.670998	0.511033	-0.0333178
1623040_at	CG4449	5	9.27749	8.63805	8.48207	8.51463	8.79159	8.36008	8.79502	8.88126	8.92914	9.16312	9.23828	9.03999	9.11803	8.87539	8.82122	8.27758	9.25082	8.47023	8.67944	8.43472	8.75732	9.02292	8.95067	8.85404	8.79431	8.5901	9.41774	9.68336	8.79161	8.86148	8.92607	8.94153	9.10082	9.29452	9.00578	8.84379	0.541212	0.469279	-0.0498618	0.22208	0.352278	0.178366	0.143429	0.309121	0.228227
1623041_at	CG13745	5	6.16566	5.12731	5.58511	5.66899	5.71064	5.45556	5.4661	5.88597	5.85809	6.06544	6.03969	5.85508	5.70427	6.06668	5.50487	5.49639	6.17405	5.42687	5.63993	5.491	5.85857	5.7718	5.724	6.02371	5.82987	5.62332	5.89915	6.35457	5.65078	5.87388	5.8206	5.64107	5.74944	6.01784	5.86513	5.60585	0.999156	0.601978	-0.000124526	0.39892	0.420184	0.0873205	0.470663	0.44596	0.0874451
1623042_at	CG34187	5	5.71067	5.81548	5.69571	5.26015	5.72605	5.55875	5.5954	5.59678	5.85441	5.46549	5.60239	5.68031	5.35788	5.50877	5.53632	5.81694	5.46453	5.61528	5.52377	5.59315	5.8409	5.58171	5.67335	5.53627	5.53589	5.43613	5.48573	5.54251	5.51322	5.55315	5.9787	5.89104	5.64687	5.69737	6.03455	5.88859	NA	NA	NA	NA	NA	NA	NA	NA	NA
1623043_s_at	CG7852	5	9.18214	8.86065	8.98321	8.92401	8.83765	8.76941	8.78709	8.90502	8.80153	9.02451	9.14538	9.03818	9.16629	8.98149	9.03255	8.7739	9.1507	8.83895	8.94019	8.89334	8.85825	8.91171	8.89588	8.92134	9.00189	8.90866	9.08476	9.38995	8.91145	8.83835	8.89271	8.88823	8.93855	9.11499	8.90722	8.84093	0.845318	0.562974	0.00881648	0.495735	0.453137	0.0382418	0.647748	0.503974	0.0294253
1623044_at	Cp15	5	14.186	13.7561	11.6547	12.2281	13.7367	11.3954	13.7195	13.4117	13.9504	13.7937	13.9458	12.6746	13.6226	13.1308	14.0508	13.266	14.2091	11.3541	13.4376	13.2396	13.4913	13.1591	13.8129	12.9824	12.5305	13.7013	14.0698	14.3568	13.3586	12.9964	12.6189	13.915	13.8799	14.1425	13.9299	13.4493	0.675831	0.5124	0.108646	0.309438	0.387112	0.374696	0.295831	0.381733	0.26605
1623046_at	CG32727	5	3.77573	4.1011	3.90094	4.04978	3.83058	3.89968	4.12156	3.9902	3.65999	3.90445	4.16805	4.17996	3.85728	3.9781	3.99995	4.03981	3.90927	3.93621	3.88367	3.99035	4.11333	4.12978	4.09351	3.79219	3.96639	3.80597	4.03144	3.92357	3.95026	3.99824	3.83941	4.09875	4.20435	3.83841	4.33763	4.13184	NA	NA	NA	NA	NA	NA	NA	NA	NA
1623047_at	---	5	4.50952	4.57735	4.35612	4.9277	4.24318	4.62414	3.95209	4.34135	4.36026	4.02933	3.89881	4.19469	4.63541	4.31141	4.4247	4.43347	4.17675	4.47838	3.96998	4.09633	4.23325	4.17695	4.36698	3.97367	4.34038	4.39583	4.32572	4.12704	4.64693	4.44199	4.67576	4.71935	4.32204	4.47971	4.25089	4.04584	NA	NA	NA	NA	NA	NA	NA	NA	NA
1623048_a_at	Lcch3	5	6.57449	7.34353	6.99037	6.98692	6.07015	6.94683	6.19733	6.5162	5.96807	6.22329	6.15084	5.7835	6.50717	6.7098	6.99593	7.04596	5.68681	7.20211	6.44841	6.97188	6.38198	6.3004	6.40111	6.61449	6.71113	7.16265	6.21216	5.22188	6.51767	6.72893	6.9333	6.39396	6.49281	6.21947	6.13731	5.77603	0.280436	0.376659	0.126212	0.594565	0.48705	-0.103682	0.297324	0.382613	-0.229894
1623049_at	CG9731	5	4.86399	4.96237	5.14081	5.10955	4.59439	4.94242	4.66837	4.91681	4.94815	4.52579	4.54575	4.9357	4.28364	5.06387	4.96095	5.10449	4.70424	4.54376	4.6042	4.57415	4.91327	4.5074	4.76972	4.4991	4.81099	4.35512	4.34266	4.77949	4.73852	5.06953	4.93461	5.20556	4.70911	4.68652	4.74392	4.89228	NA	NA	NA	NA	NA	NA	NA	NA	NA
1623050_at	HLH54F	5	4.2989	4.38213	4.31714	4.25206	4.51557	4.19999	4.38496	4.44719	4.59716	4.36439	4.3272	4.36982	4.31215	4.39506	4.34414	4.24165	4.37546	4.53468	4.40775	4.40553	4.38579	4.33124	4.3643	4.5004	4.18357	4.53328	4.42309	4.18035	4.34579	4.27947	4.48561	4.62842	4.33044	4.33216	4.55407	4.66136	NA	NA	NA	NA	NA	NA	NA	NA	NA
1623051_at	CG18125	5	4.33424	4.10391	4.47154	4.29234	4.04269	4.08028	4.34083	4.28807	4.05564	4.29497	4.37187	3.90149	4.33009	4.27359	4.29634	4.2895	7.43857	3.97234	4.24347	3.96653	4.11754	3.93971	4.02666	3.92852	4.01779	4.04634	3.99046	8.33805	4.06111	4.19022	4.07264	5.23984	4.03724	3.94706	4.13784	4.40304	0.539943	0.468698	0.187084	0.382077	0.41361	0.325313	0.776352	0.543976	0.13823
1623052_at	---	5	3.73627	3.83643	3.90284	3.64583	3.75123	3.73168	4.10148	3.64972	4.12665	3.54753	3.49263	3.7998	3.85998	4.05464	3.73571	3.88276	3.73423	3.81763	3.76984	3.66579	4.23845	3.92739	3.92698	3.91491	3.76834	3.72026	3.72223	3.82892	3.94312	3.69237	3.85342	3.73693	3.83287	3.97452	3.79404	4.03806	NA	NA	NA	NA	NA	NA	NA	NA	NA
1623053_a_at	CG5174	5	10.6281	10.3514	10.671	10.3332	10.4066	10.3427	10.4154	10.5435	10.6967	10.2389	10.2871	10.5062	10.2848	10.6317	10.3519	10.5434	10.3599	10.3637	10.1906	10.3141	10.6081	10.4384	10.4353	10.2778	10.4321	10.3708	10.3377	10.5524	10.4409	10.6524	10.3536	10.4329	10.3074	10.3499	10.6689	10.709	0.434561	0.433062	-0.0517667	0.829336	0.558681	0.015596	0.299439	0.383811	0.0673627
1623054_at	---	5	4.89903	5.08843	4.93413	4.83548	4.83462	4.84734	4.7348	4.79716	4.82089	4.84622	4.58777	5.12113	4.70407	5.00045	4.84466	4.78324	4.69384	4.78217	4.60402	4.70288	4.94662	4.72347	4.83005	4.45505	4.88604	4.71167	4.6768	5.08734	4.88064	4.85242	5.12108	5.09427	4.75078	4.66344	4.95849	4.98617	NA	NA	NA	NA	NA	NA	NA	NA	NA
1623055_at	CG9254	5	4.37994	4.27223	4.60753	4.15616	4.3991	4.22701	4.27524	4.28903	4.50002	4.16376	4.16773	4.45827	4.25156	4.43271	4.18326	4.66934	4.26486	4.38293	4.18117	4.17358	4.51855	4.34037	4.33736	4.41921	4.19197	4.257	4.18667	4.33762	4.32898	4.38896	4.44576	3.89757	4.49292	4.38891	4.39035	4.49213	NA	NA	NA	NA	NA	NA	NA	NA	NA
1623056_at	---	5	4.31152	4.41434	4.60527	4.37944	4.48075	4.60581	4.61553	4.31353	4.57498	4.2417	4.32918	4.49575	4.58806	4.72617	4.34543	4.59011	4.31873	4.52249	4.47107	4.3029	4.47461	4.34526	4.44926	4.37888	4.52718	4.20802	4.28067	4.52916	4.3394	4.26837	4.37015	4.30674	4.38854	4.57779	4.46005	4.61702	NA	NA	NA	NA	NA	NA	NA	NA	NA
1623057_at	---	5	3.75915	3.59656	3.52546	3.57516	3.87676	3.56922	3.80429	3.59878	4.03114	3.51745	3.67591	3.6584	3.48886	3.42185	3.39839	3.51208	3.68811	3.64127	3.73211	3.67679	3.64938	3.65015	4.02806	3.71581	3.49984	3.76121	3.68316	3.6263	3.68987	3.98033	3.7547	3.76499	3.80237	3.67565	3.76498	3.84986	NA	NA	NA	NA	NA	NA	NA	NA	NA
1623058_at	CG32676	5	9.24231	9.03709	8.68045	8.99291	8.97852	8.75324	8.92689	8.99745	8.8803	9.18127	9.1564	9.14191	9.29918	9.05472	8.87305	8.50242	9.10252	8.7674	9.00804	8.82499	8.7589	9.07049	8.88258	9.13431	9.16715	8.86775	9.08648	9.29436	8.83971	8.80805	8.9471	8.95019	8.97722	9.16083	8.89221	8.56191	0.315937	0.389739	-0.0575106	0.647374	0.503956	-0.034646	0.814322	0.554819	0.0228646
1623059_at	---	5	3.35498	3.24259	3.4098	3.17363	3.31717	3.22199	3.32133	3.36229	3.55486	3.26308	3.11984	3.4084	3.10081	3.28048	3.11448	3.57442	3.48386	3.11392	3.25785	3.32236	3.21683	3.12361	3.291	3.25026	3.47079	3.27435	3.07912	3.3154	3.1826	3.16028	3.13445	3.24269	3.19377	3.45301	3.45878	3.39876	NA	NA	NA	NA	NA	NA	NA	NA	NA
1623060_at	Cpr12A	5	3.99336	3.87244	4.28368	4.23513	4.23769	4.21169	4.3362	4.1971	4.4187	4.11168	4.17879	4.4354	4.16966	4.30593	4.26943	4.43857	4.00918	4.25264	4.58805	4.18169	4.32571	4.46161	4.15808	4.09752	4.13678	4.25786	4.00261	3.98241	4.17561	4.21806	4.2292	4.43569	3.85409	4.24103	4.18444	4.47014	NA	NA	NA	NA	NA	NA	NA	NA	NA
1623061_at	CG10561	5	8.9039	9.3388	9.42291	9.16622	9.04924	9.22835	8.95368	8.83515	8.66495	8.67889	8.79673	8.8168	9.22294	9.22701	9.35886	9.39797	8.65421	9.4358	9.11694	9.45798	8.99707	8.93369	9.05799	8.98466	9.03575	9.42115	8.87589	8.52443	9.10626	9.14257	9.1618	9.05715	8.92031	8.92125	8.95119	8.68049	0.0472697	0.192972	0.165789	0.957259	0.592281	-0.00478308	0.111512	0.281503	-0.170572
1623062_at	---	5	3.76519	3.99432	3.70492	3.6248	3.76091	3.90911	3.86803	3.78011	3.81229	3.86479	3.78902	3.60141	3.67525	3.8821	3.72604	3.89282	3.77621	3.6685	3.86921	3.66727	3.82688	3.64695	3.97109	3.75177	3.71682	3.64981	3.70827	3.69746	3.68646	3.59081	3.7174	3.7968	3.77378	3.67604	3.81857	3.89186	NA	NA	NA	NA	NA	NA	NA	NA	NA
1623063_at	dpr20	5	6.03939	7.01465	6.80587	6.72939	6.17128	6.6105	5.72697	6.17818	5.94655	5.99727	6.00294	6.16731	6.18106	5.84671	6.65616	6.79412	5.72821	6.80579	6.55075	6.73284	5.83284	6.13523	6.15891	6.37509	6.40104	6.75045	6.17432	5.18662	6.32907	6.26732	6.43547	6.14119	6.16752	6.04125	5.93841	5.93776	0.817285	0.555769	0.033951	0.425666	0.430187	-0.134989	0.390473	0.417457	-0.16894
1623064_at	---	5	3.89497	4.13366	4.13665	4.3175	4.4132	4.19414	4.40553	4.03343	4.11298	4.12392	4.16838	4.54298	3.84553	4.16788	4.12313	4.26308	3.9679	3.96818	4.46743	4.15215	4.11204	4.2236	4.24288	4.0976	4.19546	4.05484	4.13201	4.08374	4.03844	4.11074	4.20609	4.15697	4.07026	3.90567	4.39845	4.34148	NA	NA	NA	NA	NA	NA	NA	NA	NA
1623065_at	CG13692	5	4.85253	5.06463	5.22915	5.09861	5.31782	5.20159	5.24367	4.86821	5.13163	5.05636	5.09862	5.08212	4.96294	5.29622	5.28205	4.97612	4.99992	5.34888	5.13611	5.35856	5.09498	5.1946	5.21258	5.1502	5.07642	5.14416	5.05009	5.51937	4.81578	5.32723	5.04128	5.35705	5.28742	5.00821	5.03502	5.37869	NA	NA	NA	NA	NA	NA	NA	NA	NA
1623067_at	---	5	3.85364	4.16809	4.217	3.969	4.06073	4.2266	4.09538	3.96807	4.15991	4.09891	3.98061	4.09582	3.97785	4.00343	3.95195	4.12209	4.26456	3.94237	4.26671	4.11079	4.14795	4.11112	4.14485	3.93712	4.1374	3.96002	4.05989	4.15696	4.06611	4.05142	4.07844	4.05537	4.02391	4.10983	3.96029	4.16653	NA	NA	NA	NA	NA	NA	NA	NA	NA
1623070_a_at	Shaw	5	6.33501	6.6442	6.86727	6.49677	6.43011	6.72289	6.586	6.29008	6.40918	6.17432	6.20112	6.35991	6.2961	6.44079	6.61126	6.68156	6.20235	6.81097	6.5027	6.59375	6.33633	6.39069	6.57981	6.1964	6.40259	6.49578	6.38294	6.06098	6.48753	6.50957	6.686	6.53248	6.25963	6.43577	6.37319	6.4633	NA	NA	NA	NA	NA	NA	NA	NA	NA
1623071_at	---	5	4.04491	3.77718	3.91562	3.77253	3.76811	3.69191	3.67456	3.7402	3.6425	3.90093	3.59069	3.70516	3.70189	3.54539	3.63141	3.97306	3.55167	3.73466	3.73741	3.90616	3.75019	3.68947	4.09224	3.58345	3.6382	3.903	3.87207	3.80452	3.96584	3.79469	3.89995	3.73677	3.95822	3.85015	3.67962	3.80775	NA	NA	NA	NA	NA	NA	NA	NA	NA
1623072_at	Muc91C	5	5.41681	5.61405	6.45042	5.2175	5.36962	5.44462	5.5807	5.40005	5.72711	5.46597	5.39657	5.43614	5.55393	5.58363	5.16897	5.5884	5.67061	5.46244	5.47443	5.52005	5.56936	5.44734	5.63388	5.28502	5.48294	5.34993	5.47629	5.47925	5.44715	5.41468	5.65941	5.55823	5.41508	5.78419	5.72356	5.88045	NA	NA	NA	NA	NA	NA	NA	NA	NA
1623073_s_at	ctp	5	12.523	12.4314	12.3672	12.496	12.6264	12.5299	12.6372	12.5766	12.5941	12.6715	12.6765	12.6941	12.5377	12.4013	12.5525	12.414	12.6595	12.5224	12.547	12.5407	12.5697	12.7021	12.6074	12.62	12.5426	12.5623	12.7644	12.7373	12.6147	12.5338	12.4688	12.5426	12.7159	12.7118	12.5365	12.6098	0.579523	0.482296	-0.0124423	0.373119	0.410572	0.0430707	0.153643	0.315792	0.055513
1623074_at	---	5	4.48471	4.69375	4.93269	4.64945	4.87708	4.76415	5.15664	4.63931	5.22656	4.8415	4.77408	4.89609	4.77476	4.73334	4.71349	4.97197	5.12891	4.77401	4.75473	4.7858	4.46969	5.08237	4.91262	4.6492	4.6271	4.60841	4.97808	4.75977	4.7637	4.79388	4.8745	4.74845	4.86569	4.99379	4.98187	5.26382	NA	NA	NA	NA	NA	NA	NA	NA	NA
1623075_at	---	5	3.26526	3.11214	3.1151	2.95853	3.10766	3.08064	2.87937	3.15486	3.06548	3.04299	3.00101	3.04854	3.1084	3.27635	2.89652	3.21881	3.20716	3.03613	2.94137	2.99347	3.09359	2.99971	2.97769	2.93009	3.09655	3.12915	2.95243	3.15893	3.08562	2.98471	3.05383	3.16595	3.13068	3.08983	3.17823	3.0033	NA	NA	NA	NA	NA	NA	NA	NA	NA
1623076_at	CG32803	5	9.15368	9.00507	9.02993	8.97869	8.99654	9.02624	9.11213	9.00188	9.2143	9.14007	9.15145	9.08921	8.96819	9.08801	8.88189	8.94133	9.16042	9.01209	9.13697	8.97233	9.10525	9.18554	9.04059	9.10289	8.96457	8.9459	9.19806	9.40177	9.10606	9.21786	9.03845	9.15712	9.08646	9.1645	9.06773	9.30027	0.403305	0.42212	-0.0253075	0.248237	0.363825	0.0624644	0.125276	0.295465	0.0877719
1623077_at	---	5	3.37501	3.21579	3.47822	3.37579	3.76033	3.3471	3.27887	3.23078	3.37291	3.3317	3.44006	3.41084	3.27453	3.25409	3.31307	3.54055	3.14692	3.39462	3.10006	3.25971	3.57273	3.69812	3.52095	3.34562	3.47229	3.35691	3.42505	3.61784	3.5881	3.36339	3.56001	3.33164	3.21642	3.46154	3.22738	3.5076	NA	NA	NA	NA	NA	NA	NA	NA	NA
1623078_at	---	5	3.66298	3.73125	3.69663	3.47465	3.55701	3.50152	3.61046	3.5231	3.30227	3.44035	3.45858	3.42661	3.80637	3.55744	3.44331	3.7015	3.48533	3.47962	3.45764	3.37787	3.52735	3.61413	3.60723	3.5173	3.48377	3.34078	3.45138	3.38021	3.3338	3.57043	3.53981	3.60215	3.32026	3.29932	3.58095	3.57018	NA	NA	NA	NA	NA	NA	NA	NA	NA
1623079_at	---	5	3.25876	3.1406	3.37317	3.22509	3.33519	3.14436	3.40718	3.2726	3.05486	3.21809	3.36492	3.18534	3.37021	3.3285	3.32367	3.37832	3.32528	3.22917	3.3097	3.36466	3.22873	3.44037	3.24014	3.36556	3.13324	3.19423	3.35843	3.08012	3.28239	3.25365	3.37915	3.20469	3.36349	3.27711	3.33584	3.525	NA	NA	NA	NA	NA	NA	NA	NA	NA
1623080_at	CG18410	5	8.61156	8.83048	9.00964	9.13089	8.72325	8.86906	8.70573	8.69643	8.45249	8.47502	8.4522	8.73745	8.81995	8.7535	8.98485	8.97531	8.53095	8.84812	8.92297	8.99796	8.4991	8.4876	8.59931	8.75973	8.97459	9.14079	8.46562	8.53543	8.92422	8.70882	8.84505	8.79334	8.74065	8.59994	8.65606	8.67451	0.376975	0.41186	0.0404308	0.746068	0.534232	0.0304051	0.907535	0.579882	-0.0100257
1623081_at	Jhebp29	5	10.41	10.4103	10.3279	10.3946	10.4305	10.4061	10.434	10.3281	10.3262	10.4597	10.2997	10.3829	10.4298	10.3991	10.3023	10.3915	10.4171	10.4347	10.5266	10.4045	10.3198	10.5014	10.3831	10.5042	10.4023	10.3815	10.3896	10.416	10.4082	10.4572	10.2888	10.3046	10.3197	10.3928	10.3057	10.4517	NA	NA	NA	NA	NA	NA	NA	NA	NA
1623082_s_at	---	5	3.20331	2.88423	3.14511	3.00686	3.03391	3.02348	3.00604	2.89075	3.12009	2.97212	3.08582	3.02863	3.12822	3.00532	2.9826	3.06299	3.08917	2.76804	3.35755	2.95619	2.89587	3.02203	3.04185	3.16638	2.93058	3.05382	2.85903	2.97949	2.87089	3.25468	3.0524	3.27933	2.98408	3.05599	3.11659	3.00749	NA	NA	NA	NA	NA	NA	NA	NA	NA
1623084_at	sgg	5	7.87593	8.67029	8.60261	8.53534	7.92592	8.43963	7.39719	8.04128	7.34157	7.46985	7.61093	7.66836	8.04638	7.96885	8.48982	8.33458	7.14605	8.44792	7.86035	8.43931	7.99296	7.34078	7.84543	7.38785	8.16523	8.83034	7.79212	7.03933	8.05344	8.02364	7.88614	7.95327	7.70785	7.58872	7.36366	7.49442	0.858084	0.566417	-0.0232179	0.404446	0.422316	-0.140061	0.534534	0.466992	-0.116843
1623085_at	CG12637	5	3.7758	3.59124	3.88766	3.67125	3.63865	3.58814	3.90882	3.61111	3.93201	3.63798	3.55634	3.76401	3.67031	3.51425	3.69612	3.77135	3.52851	3.63646	3.50077	3.59603	3.77748	3.67257	3.68507	3.9475	3.85216	3.61945	3.76768	3.80778	3.54122	3.62858	3.62169	3.97255	3.88293	3.80568	3.88316	3.78578	NA	NA	NA	NA	NA	NA	NA	NA	NA
1623086_at	Gnf1	5	9.36083	8.5955	8.59109	8.72785	8.86375	8.51157	8.91309	8.8694	9.03485	9.25945	9.35086	9.13246	9.22159	9.04502	8.8755	8.25455	9.35646	8.50812	8.90596	8.57813	8.91799	9.11207	8.92845	8.95248	8.80488	8.55245	9.37438	9.57449	8.87678	8.98144	8.89933	9.01842	9.17995	9.35978	9.1522	9.04751	0.618758	0.494957	-0.0461984	0.26782	0.370541	0.134243	0.245367	0.363079	0.180441
1623087_at	Gef64C	5	5.40954	5.50529	5.4265	5.47117	5.17013	5.3844	5.28253	5.34964	5.30214	5.49012	5.24052	5.30006	5.48642	5.39531	5.37224	4.94407	5.53237	5.59096	5.38163	5.37532	5.2748	5.01359	5.37402	5.34583	5.46948	5.38274	5.30986	5.603	5.38044	5.45335	5.1355	5.18272	5.36127	5.29296	4.81034	5.07016	NA	NA	NA	NA	NA	NA	NA	NA	NA
1623088_at	CG10855	5	7.26382	7.56805	7.63629	7.62743	7.28239	7.31722	7.35086	7.2722	7.07912	7.22009	7.23826	7.28718	7.39779	7.19285	7.39165	7.15856	7.23266	7.44316	7.06584	7.44282	7.30155	7.26261	7.17312	7.35844	7.38094	7.52901	7.14523	7.22013	7.22248	7.21722	7.29248	7.19495	7.2645	7.17912	7.32999	7.14679	NA	NA	NA	NA	NA	NA	NA	NA	NA
1623089_at	Mst84Db	5	4.04413	4.3477	4.39851	4.34855	4.27155	4.26193	4.47995	3.71092	4.16136	4.10881	4.03673	4.33215	4.23851	4.5538	4.02411	3.98446	4.49758	4.20171	4.13511	4.25147	4.35061	4.3269	4.00745	4.08923	4.33921	4.14913	4.18532	4.36995	4.40585	4.27823	4.38484	3.97311	4.94319	4.25703	4.33616	4.50311	NA	NA	NA	NA	NA	NA	NA	NA	NA
1623090_at	CG30390	5	8.08763	8.00557	7.85326	7.91828	8.04228	7.78712	7.90741	7.86262	7.88526	8.07415	7.94468	8.04591	7.98912	8.03749	7.88075	7.82218	8.2554	7.96817	8.12113	7.99761	7.8893	7.9288	7.86472	8.01835	7.802	7.9215	8.16059	8.13759	7.9998	8.0133	7.96265	8.06314	8.10026	8.1656	8.046	8.00223	NA	NA	NA	NA	NA	NA	NA	NA	NA
1623091_at	CG12644	5	5.43557	6.20626	5.84186	5.94486	5.49286	5.57924	5.26149	5.51906	5.46445	5.24695	5.06804	5.66747	5.31924	5.60279	5.74484	5.89947	5.19579	5.38583	5.45851	5.48275	5.64983	5.27349	5.36417	4.96759	5.16687	5.38458	5.31641	5.41847	5.58437	5.31326	5.46066	5.79762	5.66756	5.57068	5.50619	5.48251	NA	NA	NA	NA	NA	NA	NA	NA	NA
1623092_at	Pcp	5	4.42541	4.74785	5.26307	5.71235	4.92485	6.50034	4.84369	5.02345	5.05661	5.49823	4.82294	4.93419	5.76243	4.60194	5.20555	5.01132	8.48663	4.29244	4.4083	4.83056	5.35755	4.86632	4.61009	4.64286	4.89689	4.66665	4.50322	7.32649	4.73625	5.77135	4.71508	5.22015	4.7324	4.67974	4.88862	5.00617	0.94703	0.590001	0.026918	0.794468	0.549426	-0.0508334	0.857654	0.566417	-0.0777514
1623093_at	CG13188	5	3.94826	4.12451	4.04713	3.91466	3.86236	3.82401	3.8868	3.90094	4.06535	3.89108	3.9022	3.8553	3.99438	4.05749	3.80089	3.85711	3.9621	3.84064	4.03829	3.98878	4.19465	4.01861	4.25356	3.65022	3.89624	3.80792	3.95881	4.06432	3.91122	3.71313	3.84351	4.07241	4.08916	4.06091	4.0795	3.89672	NA	NA	NA	NA	NA	NA	NA	NA	NA
1623094_at	Tsp42Ei	5	9.2117	9.88846	9.88673	9.96028	9.64795	10.0712	9.2939	9.48033	9.06559	9.14337	9.30236	9.56177	9.42711	9.21411	9.77582	9.79589	9.20041	10.0432	9.62473	9.95414	9.13261	9.24058	9.4147	9.75483	9.71304	10.0918	9.25787	8.86208	9.89638	9.57421	9.78562	9.43335	9.47067	8.97645	9.24171	9.31444	0.954917	0.591438	0.00537233	0.607783	0.49115	-0.0746679	0.623981	0.496943	-0.0800403
1623095_at	---	5	4.34138	4.40998	4.43501	3.9571	4.36281	4.4895	4.44692	3.9745	4.28118	4.1978	4.18547	4.58319	4.44476	4.27074	4.11784	4.26038	4.31482	4.36207	3.92465	4.29225	4.37429	4.47308	4.15587	3.95083	4.15316	4.33627	4.1038	4.08097	4.22483	4.10135	4.43177	4.24219	4.42663	4.21249	4.54643	4.55861	NA	NA	NA	NA	NA	NA	NA	NA	NA
1623096_a_at	Tsp68C	5	3.50857	3.77566	3.70497	3.48102	3.54443	3.54039	3.56721	3.63967	3.65308	3.46836	3.5368	3.37693	3.72931	3.53069	3.7851	3.72981	3.44786	3.59106	3.39891	3.59319	3.56933	3.57792	3.56168	3.21772	3.68877	3.66586	3.38919	3.64197	3.34075	3.2957	3.59874	3.5515	3.60142	3.57613	3.50356	3.66035	NA	NA	NA	NA	NA	NA	NA	NA	NA
1623097_at	CG31920	5	3.65674	3.87637	3.91661	3.74421	3.90003	3.83843	4.16335	4.03708	3.68401	3.83665	3.88322	4.16437	3.94815	3.95583	3.9159	4.14103	3.60585	3.85003	3.81026	3.92849	3.99832	3.804	3.92215	3.64078	3.6285	3.87949	3.87497	3.81489	4.05851	3.6861	3.72127	3.8672	3.86226	3.68424	3.71146	3.81943	NA	NA	NA	NA	NA	NA	NA	NA	NA
1623098_at	CG30323	5	4.95917	5.21031	4.72959	4.81182	5.09791	5.01873	4.86722	4.75824	5.15031	5.09862	5.09433	4.99644	4.87217	5.00321	4.84443	4.92074	4.64157	4.50799	4.90168	5.02461	4.78184	4.90036	5.12088	4.79615	4.78772	4.78588	4.75652	4.83189	4.75439	4.90668	4.91894	5.18063	5.16897	4.80047	4.76018	4.93929	NA	NA	NA	NA	NA	NA	NA	NA	NA
1623099_at	---	5	3.93639	3.74498	3.63451	3.71188	3.8826	3.5982	4.04391	3.83776	3.82365	4.09773	3.53332	4.10109	4.16061	3.92983	3.84933	4.09125	3.93168	3.88166	3.80033	3.90505	4.00063	3.91107	3.90831	3.70899	3.89962	3.72341	3.92236	4.16533	3.61837	3.76907	3.78506	3.99989	4.06274	4.00911	3.91067	3.93902	NA	NA	NA	NA	NA	NA	NA	NA	NA
1623100_at	Aac11	5	10.8927	10.6218	10.7076	10.7326	10.8176	10.6872	10.8013	10.8388	11.001	10.8796	10.907	10.7291	10.7008	10.7868	10.6689	10.7625	10.9264	10.9606	10.7471	10.7873	10.9558	10.8799	10.8642	10.7913	10.8603	10.9257	10.8569	10.8506	10.8471	11.1307	10.9193	10.8451	10.8417	10.9246	10.7984	10.6174	0.619211	0.495047	0.0179401	0.214473	0.348348	0.0667814	0.209215	0.34565	0.0488412
1623101_at	Cbp80	5	4.7688	4.70364	5.0995	5.44752	5.17288	5.19562	5.12938	5.05793	4.81644	5.47954	5.40808	5.13866	5.12181	4.74528	5.13691	4.92689	5.0995	5.21545	5.05617	5.20237	4.98303	5.26759	5.3013	5.15796	5.01843	5.43674	5.249	5.06394	5.10086	4.81455	4.77357	4.95127	5.18572	5.32819	4.81115	4.87808	NA	NA	NA	NA	NA	NA	NA	NA	NA
1623103_at	CG14946	5	7.42884	7.84868	7.59346	7.79305	7.30482	7.69302	7.464	7.5126	7.11631	7.15415	7.08154	7.17198	7.26057	7.60418	7.77473	8.02273	6.66662	7.72815	7.45154	7.94369	6.94395	7.00937	7.16202	7.48418	7.76543	7.56321	6.73788	6.43791	7.52001	7.17295	7.04262	6.90096	6.62748	6.58773	6.78533	7.15452	0.91408	0.581906	-0.00922598	0.0106941	0.0858282	-0.405534	0.0613777	0.21799	-0.396308
1623104_at	Smc5	5	4.80584	4.70403	4.8873	4.77552	4.76857	4.72963	5.11597	4.73535	5.10434	4.91583	4.74063	4.79461	4.6819	4.65166	4.83587	5.00976	4.89258	4.70374	4.75995	4.69243	4.62704	4.88879	4.70144	4.82883	4.80411	4.68901	4.97705	5.04007	4.83433	4.79262	4.81956	4.88896	4.95213	4.68048	4.70134	4.81011	NA	NA	NA	NA	NA	NA	NA	NA	NA
1623105_at	CG18672	5	4.02649	3.60361	3.91394	3.79366	3.72329	3.71316	3.64699	3.67493	3.69782	3.7981	3.63643	3.75682	3.40628	3.87852	3.61489	3.62706	3.84958	3.62547	3.58811	3.51664	3.71372	3.59503	3.60974	3.69635	3.78738	3.6932	3.69438	3.73606	3.80258	3.56834	3.61478	3.74562	3.54172	3.68203	3.6532	4.14789	NA	NA	NA	NA	NA	NA	NA	NA	NA
1623106_s_at	CtBP	5	10.2513	10.1146	10.1554	10.0188	9.97398	10.0267	10.0287	10.1493	10.1816	9.93474	10.04	10.0414	10.0742	10.1854	10.1119	10.1546	10.0276	10.0257	10.0437	10.0589	10.3222	10.1107	10.0461	10.0525	10.0663	10.1573	10.0269	10.2211	10.067	10.3317	10.2265	10.2369	10.0515	10.1691	10.176	10.0858	0.412804	0.425557	0.0247427	0.123682	0.293793	0.0749666	0.261074	0.368227	0.0502239
1623107_at	CG10459	5	4.28932	4.1575	4.34297	4.07863	4.13123	4.23243	4.10562	4.14346	4.25345	4.3014	3.99715	4.31317	4.17584	4.20732	3.99466	4.39885	4.24647	4.32155	3.91558	4.1103	4.53691	4.2146	4.32397	3.94103	4.13482	4.11864	4.12889	4.13805	4.19666	4.32854	4.25257	3.95532	4.29957	3.98188	4.37005	4.38095	NA	NA	NA	NA	NA	NA	NA	NA	NA
1623108_at	geminin	5	10.8139	9.72914	10.0208	9.85701	10.2326	9.68757	10.287	10.2982	10.5243	10.5547	10.6888	10.4423	10.5498	10.332	10.1019	9.63797	10.6875	9.71238	10.1778	9.7576	10.3869	10.4473	10.3145	10.111	10.1898	9.844	10.791	11.0631	10.1959	10.3179	10.2268	10.3356	10.4601	10.7007	10.6336	10.5799	0.440303	0.435027	-0.0766292	0.209127	0.34565	0.183506	0.1332	0.301472	0.260135
1623109_at	CG4593	5	9.31596	8.98535	9.19217	9.27579	9.50863	9.16572	9.62612	9.50785	9.68883	9.70361	9.69754	9.61963	9.44201	9.24495	9.27265	9.20457	9.72193	9.32545	9.58356	9.28164	9.39347	9.63835	9.56521	9.50812	9.36206	9.27097	9.75168	9.76957	9.53767	9.35485	9.21154	9.35015	9.51033	9.67244	9.29565	9.47593	0.86574	0.568194	-0.00877511	0.804453	0.551982	0.0229702	0.693082	0.517457	0.0317453
1623110_s_at	---	5	3.57095	3.55303	3.35817	3.68883	3.54671	3.43198	3.4252	3.91774	3.40745	3.38108	3.48624	3.71831	3.55663	3.78856	3.80959	3.30892	3.61235	3.47076	3.58057	3.50124	3.62754	3.59144	3.66303	3.52351	3.54584	3.73429	3.53255	3.42874	3.6852	3.67083	3.43543	3.6288	3.74376	3.67749	3.86281	3.47748	NA	NA	NA	NA	NA	NA	NA	NA	NA
1623111_at	CG14362	5	3.33894	3.18253	3.37092	3.46868	3.31775	3.28691	3.4637	3.3599	3.43344	3.17165	3.30842	3.41777	3.29093	3.33777	3.17832	3.4419	3.37905	3.39003	3.34894	3.21548	3.54422	3.42608	3.4634	3.56389	3.41491	3.23808	3.37961	3.40375	3.2938	3.34707	3.43304	3.46539	3.60492	3.40351	3.42623	3.53182	NA	NA	NA	NA	NA	NA	NA	NA	NA
1623112_at	---	5	4.71899	4.61331	4.96319	4.63331	4.65749	4.62532	4.72153	4.76803	4.87484	4.43949	4.61796	4.61864	4.58911	4.38593	4.45475	4.71472	4.55946	4.41752	4.53411	4.57382	4.89543	4.55875	4.68931	4.52274	4.73287	4.89237	4.48533	4.52562	4.41939	4.98803	4.57805	4.7427	4.42264	4.70209	4.61688	4.59356	NA	NA	NA	NA	NA	NA	NA	NA	NA
1623113_at	CG13167	5	4.58605	4.53707	4.63469	4.38035	4.6529	4.49196	4.48923	4.75574	4.45184	4.40292	4.61179	4.47475	4.44324	4.41888	4.4749	4.34174	4.241	4.41603	4.40676	4.45556	4.38567	4.32521	4.59292	4.41218	4.16315	4.37029	4.34277	4.54898	4.33016	4.31954	4.19686	4.47732	4.75044	4.66408	4.43948	4.86627	NA	NA	NA	NA	NA	NA	NA	NA	NA
1623114_at	---	5	3.41088	3.26685	3.38743	3.41931	3.57721	3.38901	3.28157	3.4168	3.35858	3.27418	3.31445	3.53462	3.35591	3.69553	3.39333	3.51393	3.40817	3.32306	3.33137	3.35232	3.52928	3.44542	3.48094	3.38362	3.45776	3.23474	3.45254	3.4924	3.07892	3.29115	3.33041	3.44969	3.35995	3.47719	3.56125	3.42046	NA	NA	NA	NA	NA	NA	NA	NA	NA
1623115_at	CG14071	5	3.78816	3.07817	3.4598	3.32534	3.38701	3.60376	3.38683	3.41656	3.39486	3.38149	3.34761	3.38662	3.62677	3.38068	3.11967	3.46849	3.51363	3.39739	3.24829	3.34957	3.36943	3.40103	3.24572	3.24821	3.31331	3.46857	3.29152	3.41995	3.31345	3.56732	3.54681	3.32965	3.35048	3.45901	3.40105	3.24618	NA	NA	NA	NA	NA	NA	NA	NA	NA
1623116_at	---	5	3.9062	4.29354	4.25335	3.99623	3.78081	3.97664	3.86716	3.61423	4.00939	3.8373	4.08722	3.85517	3.94879	4.08212	3.91819	3.97138	3.88072	3.98436	4.10712	3.68847	3.71176	3.84105	4.04871	3.85451	3.59588	3.99479	3.91587	3.85999	3.63989	3.78857	3.90352	4.0954	4.08469	3.93448	4.17804	3.8512	NA	NA	NA	NA	NA	NA	NA	NA	NA
1623118_s_at	CG4168	5	6.402	6.63933	6.93679	6.69872	6.78392	6.629	6.73847	6.47724	6.38096	6.51684	6.45263	6.81074	6.52374	6.727	6.83924	6.90695	6.57309	7.0219	6.78487	6.94034	6.65565	6.73554	6.98357	6.62703	6.72375	6.59906	6.57156	6.2839	6.51484	6.51468	6.59661	6.64281	6.67282	6.66451	6.66702	6.83284	NA	NA	NA	NA	NA	NA	NA	NA	NA
1623119_at	---	5	6.77606	6.92788	7.06879	6.7907	6.79409	6.87912	6.80383	6.75943	6.44625	6.6865	6.63949	6.81288	6.78381	6.66587	6.84174	6.61372	6.47307	6.92727	6.667	6.93607	6.72288	6.7248	6.77062	6.75359	6.82327	7.10727	6.70858	6.23641	6.85311	6.93555	6.9282	6.6347	6.75129	6.65333	6.49976	6.52347	NA	NA	NA	NA	NA	NA	NA	NA	NA
1623120_at	---	5	3.67544	3.48109	3.54696	3.70714	3.73788	3.73913	3.82982	3.69325	3.61538	3.6213	3.76906	3.80395	3.74816	3.70207	3.48485	3.63621	3.80008	3.65628	3.65138	3.54648	3.9462	3.63823	3.99195	3.61844	3.70622	3.77566	3.81148	3.68842	3.57679	3.83536	3.82798	3.75759	3.64073	3.69866	3.69363	3.97525	NA	NA	NA	NA	NA	NA	NA	NA	NA
1623121_at	CG5521	5	4.88669	4.44516	4.5486	4.38032	4.40864	4.26384	4.47695	4.46634	4.88041	4.41058	4.59887	4.63575	4.35364	4.82881	4.40837	4.57016	4.75328	4.38896	4.11536	4.13532	4.21403	4.46924	4.38403	4.50232	4.69161	4.50399	4.38077	4.68809	4.37735	4.5783	4.54538	4.53865	4.29526	4.62906	4.66627	4.42954	NA	NA	NA	NA	NA	NA	NA	NA	NA
1623122_at	CG17294	5	8.28178	8.63048	8.86663	8.79374	8.63928	8.72712	8.65717	8.56446	8.41934	8.68769	8.52269	8.62231	8.47458	8.52992	8.6672	8.68194	8.66405	8.96863	8.78748	8.78276	8.49444	8.64185	8.5347	8.77646	8.61452	8.86133	8.65174	8.70047	8.75702	8.6731	8.7603	8.60506	8.69492	8.64833	8.37507	8.68576	0.258394	0.367135	0.0492774	0.320139	0.391443	0.0512433	0.969442	0.595314	0.00196592
1623123_at	---	5	4.09937	3.99386	4.25417	4.20232	4.38066	4.21028	4.31167	4.10931	4.28363	4.29313	4.0935	4.25513	4.29297	4.12645	4.21221	4.29177	4.07113	4.26545	4.28263	4.34184	4.20034	4.30504	4.32905	4.29187	4.33894	4.12666	4.21592	4.19117	4.05023	4.28912	4.12058	4.10485	4.44519	4.23518	4.37776	4.54113	NA	NA	NA	NA	NA	NA	NA	NA	NA
1623124_at	CG7376	5	6.89724	6.42329	5.8794	6.6771	6.58989	6.33586	6.51744	6.64888	6.75311	6.83827	6.95655	6.61418	6.49103	6.54204	6.38559	6.16088	6.80759	6.26137	6.49411	6.3118	6.42024	6.69873	6.43135	6.8663	6.52785	6.5353	7.0348	6.95858	6.58317	6.58127	6.56066	6.54598	6.6043	6.63471	6.73418	6.14036	0.295429	0.381635	-0.105015	0.836227	0.560725	0.02583	0.276333	0.37422	0.130845
1623125_at	CG4459	5	4.31989	4.32546	4.59393	4.3471	4.3457	4.38783	4.52142	4.44083	4.39633	4.42579	4.62243	4.31508	4.55011	4.89435	4.58033	4.48155	4.71647	4.33448	4.49601	4.47133	4.75793	4.44412	4.56544	4.20096	4.56873	4.1866	4.61885	4.64487	4.25736	4.48344	4.42982	4.36732	4.03502	4.62453	4.42547	4.657	NA	NA	NA	NA	NA	NA	NA	NA	NA
1623126_at	CG13912	5	9.41967	10.1094	10.1762	10.0054	9.69362	10.0146	9.60441	9.68654	9.62994	9.54841	9.33472	9.5072	9.6371	10.2443	9.93108	10.2271	9.73063	10.009	10.0612	10.0667	9.70768	9.39625	9.76455	9.56253	9.42837	10.0948	9.50882	9.56946	9.79954	10.0074	9.82326	9.8186	9.58245	9.51346	9.64962	9.87845	0.0582779	0.21336	0.133985	0.957156	0.59224	-0.00466877	0.0855642	0.252962	-0.138654
1623127_a_at	mthl12	5	2.94931	2.91571	3.27606	2.83375	3.08706	3.25364	3.10499	2.93969	3.21303	3.014	3.10072	2.95293	3.05982	3.19244	2.95844	3.12088	3.11714	3.2318	3.04728	3.08864	3.08695	3.03813	3.02257	3.11923	3.0277	3.22336	3.07745	3.31394	3.06534	3.00466	3.09169	2.94692	3.10137	3.14264	3.21127	3.11802	NA	NA	NA	NA	NA	NA	NA	NA	NA
1623128_at	CG13455	5	4.00481	3.95734	3.66507	3.80519	3.92911	3.90768	3.79116	3.96252	3.67714	3.82613	3.80683	3.86945	3.91304	3.7503	4.09656	4.21031	3.86193	3.83877	3.98896	3.78147	3.94191	3.94607	3.89148	4.0748	3.68554	3.79204	3.75744	3.47717	3.92198	3.75216	3.78798	4.12661	3.84913	3.91505	4.00333	3.88215	NA	NA	NA	NA	NA	NA	NA	NA	NA
1623129_at	---	5	4.33335	4.17059	4.29663	4.29428	4.31147	4.25795	4.81743	4.42563	4.43235	4.24336	4.32935	4.2313	4.3811	4.47794	4.39115	4.68048	4.42664	4.21075	4.47198	4.5701	4.68142	4.50753	4.35523	4.49615	4.28898	4.27128	4.34764	4.3105	4.53051	4.32115	4.38776	4.31248	4.4045	4.20556	4.45557	4.29687	NA	NA	NA	NA	NA	NA	NA	NA	NA
1623130_at	CG30457	5	7.1443	7.51744	7.58052	7.42694	7.66465	7.4305	7.64751	7.4412	7.65928	7.54892	7.42335	7.64039	7.4778	7.59661	7.25076	7.47376	7.30389	7.41973	7.37745	7.43895	7.80338	7.67521	7.78954	7.23771	7.44188	7.22695	7.48615	7.4887	7.30383	7.29421	7.56498	7.47911	7.5116	7.6417	7.90687	7.69843	NA	NA	NA	NA	NA	NA	NA	NA	NA
1623131_at	---	5	5.04728	4.92736	4.9652	4.98305	4.98321	4.88591	5.15978	4.94119	5.21727	5.19556	4.84337	5.09012	4.99423	5.02551	4.77228	5.16606	5.09246	4.97116	4.9634	5.03758	5.20057	4.99561	5.02757	4.77699	4.92159	5.03487	5.14783	5.03144	5.08306	5.15747	5.147	5.11641	4.98602	5.11493	5.17126	5.20345	NA	NA	NA	NA	NA	NA	NA	NA	NA
1623132_at	---	5	4.39149	4.62879	4.72499	4.663	4.67879	4.69914	4.66077	4.24486	4.50851	4.45612	4.45477	4.58701	4.71183	4.6619	4.40262	4.97223	4.4129	4.28051	4.57363	4.55715	4.56445	4.48528	4.6743	4.34458	4.3653	4.39378	4.52496	4.60342	4.30128	4.70889	4.5581	4.61839	4.65525	4.72977	4.74567	4.54387	NA	NA	NA	NA	NA	NA	NA	NA	NA
1623133_a_at	CG10508	5	7.22423	8.168	8.18284	8.06894	7.52636	7.89008	6.99037	7.38766	6.84357	7.35863	7.27339	7.16332	7.54694	7.7232	8.2254	8.26572	6.9683	8.11576	7.71632	8.2381	7.32702	7.30087	7.52587	7.58045	7.60046	8.21157	7.21319	6.68757	7.85542	7.4758	7.87485	7.55457	7.35387	7.21871	7.20631	7.22449	0.118302	0.288084	0.204713	0.787663	0.547225	-0.0500467	0.213037	0.347685	-0.25476
1623134_at	CG12506	5	4.24524	4.53208	4.31141	5.80209	4.40149	5.1627	4.34734	5.21123	5.13506	4.35739	4.36994	4.94089	4.32754	4.45445	5.32468	5.94085	5.34519	5.3179	4.77944	5.17551	5.27378	4.80607	5.10615	5.44679	5.92071	5.08994	5.00838	5.03534	4.97592	4.89462	4.47398	4.55611	5.15177	4.94148	4.70309	4.77774	0.00500498	0.0541375	0.373458	0.265775	0.369967	0.226017	0.466237	0.444025	-0.14744
1623135_at	---	5	4.03054	4.08541	3.99809	4.03041	4.10467	4.01866	4.22815	4.064	4.15936	4.07855	3.93264	4.09846	3.98152	4.15316	4.02556	4.2741	4.23418	4.00546	4.10095	4.10866	4.21196	4.41835	4.28502	4.1803	3.91876	4.0308	3.83252	3.9263	3.93279	4.16411	4.07925	4.12061	4.33683	4.08748	4.13873	4.37368	NA	NA	NA	NA	NA	NA	NA	NA	NA
1623136_at	---	5	4.43534	4.46037	4.38482	4.27407	4.45684	4.4295	4.44988	4.51261	4.52454	4.35666	4.29538	4.33803	4.50311	4.58323	4.33718	4.78381	4.52422	4.49966	4.50647	4.55047	4.706	4.30354	4.48283	4.67419	4.41556	4.16679	4.39286	4.90709	4.17062	4.92966	4.67682	4.52746	4.44975	4.62268	4.74346	5.06802	NA	NA	NA	NA	NA	NA	NA	NA	NA
1623137_s_at	dpr8	5	5.29721	6.1264	5.98763	5.86942	4.97536	5.78003	5.36128	5.53143	5.5758	5.17988	5.01065	5.35444	5.43988	5.78113	5.65436	5.71391	5.20661	5.73907	5.47556	5.93159	5.51009	5.32368	5.14569	5.2167	5.58983	5.78318	5.40238	4.78512	5.67821	5.57457	5.40116	5.61818	5.39936	5.37845	5.09838	5.45078	NA	NA	NA	NA	NA	NA	NA	NA	NA
1623138_at	---	5	9.48301	9.33097	8.69807	9.59303	9.68744	9.32672	9.79205	9.6819	9.58584	10.0486	10.1631	9.83065	9.94675	9.35527	9.60667	9.11014	9.92749	9.50976	9.67602	9.55748	9.68948	9.79248	9.88694	9.70221	9.67975	9.65094	9.90492	10.0013	9.72656	9.36763	9.54863	9.48289	10.0002	9.96789	9.39563	9.45197	0.6853	0.515269	0.0449402	0.58837	0.48523	0.0797388	0.753432	0.536534	0.0347986
1623139_at	dor	5	7.52413	7.33452	7.32518	7.38495	7.2258	7.24938	7.25551	7.08165	7.45607	7.38652	7.48873	7.34235	7.31658	7.45416	7.35785	7.23855	7.47181	7.28577	7.41234	7.25237	7.19398	7.2832	7.27034	7.70139	7.42392	7.35625	7.46093	7.37641	7.17256	7.52117	7.50587	7.44057	7.46904	7.44386	7.47605	7.16686	NA	NA	NA	NA	NA	NA	NA	NA	NA
1623140_at	Ir94e	5	3.41544	3.46555	3.64647	3.49271	3.49475	3.67309	3.75684	3.44526	3.67717	3.43116	3.61372	3.5694	3.49271	3.76665	3.44191	3.91905	3.69288	3.53353	3.72013	3.70601	3.80343	3.6859	3.6773	3.27359	3.54051	3.80119	3.52477	3.79628	3.42774	3.63224	3.66518	3.99681	3.62279	3.68981	3.68587	3.63653	NA	NA	NA	NA	NA	NA	NA	NA	NA
1623141_s_at	---	5	6.07035	6.10321	6.04792	5.85924	6.20951	5.95379	6.12354	6.09714	6.17394	5.89073	5.93922	6.14282	5.88642	5.96873	5.84257	6.0226	5.8496	5.5201	5.9687	5.89111	6.27289	5.9537	5.96015	5.63178	5.91315	5.82141	5.88269	5.85929	5.93629	5.85489	6.37743	5.92691	6.11733	5.82779	6.20433	6.01762	NA	NA	NA	NA	NA	NA	NA	NA	NA
1623142_at	---	5	3.50515	3.6094	3.6781	3.55552	3.81875	3.61793	3.52991	3.70846	3.6834	3.67998	3.63304	3.79452	3.53671	3.8567	3.53041	3.75662	3.52439	3.63633	3.75262	3.6378	3.7962	3.68662	3.75586	3.40587	3.59517	3.47079	3.4812	3.54267	3.52163	3.74411	3.59841	3.70728	3.80829	3.71812	3.66158	4.08425	NA	NA	NA	NA	NA	NA	NA	NA	NA
1623143_s_at	---	5	3.993	4.06065	3.99037	3.8961	4.17479	4.16644	4.14451	4.0452	4.00729	3.93156	3.96078	4.11979	4.14256	4.22293	3.91994	4.04091	3.89798	4.08641	4.01039	4.07474	4.1605	4.10193	4.23577	3.7741	4.04514	3.97809	3.925	3.8769	3.95173	4.12226	4.07839	4.10674	3.85223	4.03357	4.14459	4.52881	NA	NA	NA	NA	NA	NA	NA	NA	NA
1623144_at	ci	5	8.04973	8.67738	8.27763	8.95593	8.61395	8.85012	8.65971	8.54827	8.40783	8.7598	8.40933	8.40375	8.65067	8.26551	8.76216	8.76866	8.78619	9.04656	8.80688	8.99311	8.47188	8.80457	8.54756	9.00459	8.58021	8.85385	8.38347	7.97199	8.81954	8.64142	8.68655	8.57835	8.90379	8.44319	8.32074	8.1551	0.0538003	0.206005	0.191243	0.847401	0.563558	-0.0229366	0.111355	0.28138	-0.214179
1623145_s_at	---	5	4.83988	5.4028	4.65862	5.2954	4.97092	5.02071	4.9335	4.92506	5.1125	4.67938	4.75246	4.69127	5.22279	4.92434	5.05471	5.04587	4.62135	5.19578	4.87257	4.83413	4.63387	4.841	4.74884	4.68862	5.3121	5.10061	4.74938	4.63057	5.10927	4.95644	4.7724	4.84202	4.69674	4.61713	4.90964	4.69894	NA	NA	NA	NA	NA	NA	NA	NA	NA
1623146_at	CG10991	5	4.89876	4.82282	4.92038	4.63644	4.83197	4.53233	4.84397	4.79819	4.81415	4.47925	4.37879	4.67656	4.60334	4.64006	4.75056	4.47993	4.39956	4.85001	4.60645	4.85354	4.80112	4.71074	4.74212	4.43941	4.62057	4.3717	4.63028	4.4823	4.65375	4.60735	4.84652	4.78236	4.70352	4.57057	5.02584	4.77193	NA	NA	NA	NA	NA	NA	NA	NA	NA
1623147_at	CG31855	5	9.39962	9.32965	9.22774	9.25693	9.3411	9.13338	9.32834	9.29013	9.47317	9.52566	9.47882	9.32047	9.32968	9.3992	9.36669	9.22147	9.45172	9.33303	9.40963	9.21987	9.38168	9.47289	9.40063	9.41944	9.27055	9.33488	9.55707	9.6096	9.3344	9.32605	9.26718	9.30567	9.4735	9.52644	9.51761	9.55633	0.41057	0.424523	0.0250783	0.0993991	0.27031	0.0811888	0.216676	0.349605	0.0561105
1623148_at	CG12990	5	4.07505	4.45323	4.09892	3.90554	4.09651	4.11829	4.25922	4.33006	4.16102	4.05169	4.04404	4.11309	4.03156	4.22524	3.88664	4.07819	4.07922	4.274	4.03045	4.24093	4.19744	4.20112	4.36673	4.17943	4.31275	4.16186	4.21427	4.06634	4.07368	4.03645	4.09966	4.08099	4.09846	4.04836	4.16962	4.25616	NA	NA	NA	NA	NA	NA	NA	NA	NA
1623149_at	---	5	4.40902	4.53904	4.70296	4.48518	4.34218	4.74002	4.62962	4.46082	4.33167	4.43805	4.55216	4.49166	4.55745	4.75369	4.46788	4.71729	4.42437	4.36025	4.57713	4.60337	4.61159	4.52611	4.46918	4.55438	4.28007	4.46159	4.32892	4.62927	4.72225	4.53525	4.60877	4.55928	4.64433	4.45585	4.57076	4.92347	NA	NA	NA	NA	NA	NA	NA	NA	NA
1623150_at	RpLP2	5	14.6506	14.6065	14.5993	14.5351	14.6044	14.5483	14.6362	14.6259	14.6746	14.6093	14.6164	14.6033	14.6073	14.6139	14.5238	14.6335	14.6642	14.5907	14.647	14.573	14.6516	14.6805	14.6425	14.6448	14.6187	14.5893	14.633	14.6655	14.6371	14.6697	14.6607	14.7138	14.6206	14.6438	14.6718	14.6624	0.397254	0.41963	0.0135815	0.0335046	0.161609	0.0397176	0.141362	0.307823	0.0261361
1623151_a_at	CG2010	5	7.00128	7.23562	7.51781	7.3023	6.69845	7.09111	6.66957	6.7989	6.58491	6.62722	6.66759	6.61465	7.07028	7.02127	7.24696	7.23063	6.6538	7.30756	6.97822	7.17193	6.7561	6.83978	7.1267	7.05553	7.07601	7.64263	6.62156	6.33504	7.06527	6.92899	7.08264	6.79604	6.78059	6.52832	6.71124	6.41801	0.0790005	0.245524	0.137444	0.611618	0.492492	-0.068589	0.139736	0.307114	-0.206033
1623152_at	beat-IIIa	5	4.91475	4.77437	4.6876	4.51757	4.8474	4.78684	4.54987	4.67778	4.69174	4.69256	4.48195	4.84316	4.58111	4.65901	4.52609	4.85238	4.38248	4.60539	4.51201	4.65852	4.6399	4.84153	4.74255	4.63958	4.3715	4.55745	4.45854	4.51171	4.50045	4.69147	4.69558	4.82878	4.61132	4.59441	5.03441	4.7638	NA	NA	NA	NA	NA	NA	NA	NA	NA
1623153_s_at	---	5	3.58933	3.87753	3.45371	3.65459	3.63345	3.74828	3.84523	3.82745	3.7473	3.66135	3.48784	3.9217	3.66551	3.99049	3.7725	3.68038	3.66655	3.70748	3.7173	3.89721	3.66303	3.72916	4.16243	3.91517	3.84797	3.54942	3.91489	3.66706	3.69186	4.00566	3.62537	3.85644	3.86904	3.81324	3.80598	3.91122	NA	NA	NA	NA	NA	NA	NA	NA	NA
1623154_a_at	CG1271	5	7.65033	7.8761	7.85525	7.70233	7.41925	7.43455	7.45895	7.4262	7.557	7.43506	7.25249	7.4054	7.6448	7.79277	7.67543	7.95107	7.27791	7.65966	7.4999	7.60674	7.58078	7.50184	7.38401	7.5636	7.77608	7.89945	7.4251	7.31636	7.63204	7.65001	7.61076	7.61494	7.45684	7.39838	7.47475	7.46855	0.198162	0.340391	0.0554656	0.754825	0.536844	0.0208603	0.634422	0.499748	-0.0346053
1623155_at	CG33284	5	6.1902	5.92386	6.02693	5.62936	5.89783	5.76726	5.87601	5.84396	6.0198	5.68739	5.6071	5.98194	5.65337	6.00385	5.5588	5.81253	5.94497	5.75374	5.82908	5.65513	6.05767	5.86662	5.72298	5.64775	5.6754	5.67095	5.70104	5.70551	5.76718	5.87331	5.93581	5.96099	5.86827	6.0522	5.79866	6.12174	NA	NA	NA	NA	NA	NA	NA	NA	NA
1623156_at	---	5	3.84121	3.85717	3.81975	3.83064	3.70345	3.82941	3.86481	3.69779	4.05609	3.85444	3.76448	3.88907	3.98986	4.19677	3.83556	3.92188	3.94258	3.68075	3.53592	3.73129	3.71846	3.75845	3.7918	4.11133	3.65927	3.86638	3.80177	3.70217	3.67847	3.97079	3.74398	3.87707	3.66502	3.89922	3.92088	4.02585	NA	NA	NA	NA	NA	NA	NA	NA	NA
1623157_at	---	5	3.67597	3.98089	3.61161	3.39776	3.48125	3.81373	3.67793	3.64288	3.59553	3.59567	3.54601	3.74031	3.71585	3.96785	3.43586	3.44839	3.63638	3.47466	3.7516	3.65462	3.6454	3.7228	3.75371	3.87157	3.68214	3.50972	3.45197	3.69312	3.71575	3.784	3.80553	3.54057	3.84895	3.6191	3.75676	3.86014	NA	NA	NA	NA	NA	NA	NA	NA	NA
1623158_s_at	rho-4	5	7.94332	7.96441	7.51495	8.32731	8.16799	8.16767	8.45011	8.30952	8.11992	8.2152	8.47052	8.528	8.06468	8.14315	8.15851	7.92258	8.48133	8.20554	8.27557	8.17249	8.15736	8.3988	8.22024	8.90803	8.15226	8.15635	8.31437	8.17101	8.25027	8.23467	8.41487	8.3194	8.31708	8.39671	8.07279	8.36202	0.379337	0.412678	0.0774467	0.351042	0.402741	0.0819057	0.94538	0.589526	0.00445894
1623159_at	---	5	3.62326	3.29593	3.42882	3.47675	3.5448	3.43052	3.43201	3.26	3.34889	3.54249	3.34638	3.36314	3.39964	3.66531	3.409	3.14402	3.27941	3.35154	3.71047	3.54236	3.27349	3.51944	3.2366	3.32717	3.45719	3.4355	3.30188	3.26925	3.30708	3.40918	3.61543	3.35036	3.59038	3.37385	3.67256	3.33738	NA	NA	NA	NA	NA	NA	NA	NA	NA
1623160_at	Mmp1	5	9.08209	9.39834	9.21905	10.196	9.93408	10.1153	9.79934	10.0266	9.33691	9.36288	9.64426	10.1912	9.64474	9.21452	9.90672	9.67742	9.76253	9.86503	9.78031	10.0584	9.86377	9.72833	9.88051	10.1244	9.6772	9.98137	9.61762	9.12673	10.0457	9.52903	9.62933	9.62769	9.78917	9.44385	9.15545	9.65441	0.373709	0.41066	0.100051	0.592469	0.486447	-0.0857061	0.139617	0.307068	-0.185757
1623161_at	CG42265	5	4.82331	4.86207	5.20824	4.71243	4.88448	4.77331	4.98868	4.69768	4.78628	4.87677	4.90178	5.04742	4.93635	4.88071	4.73975	4.87297	4.83754	4.74874	4.82328	4.82845	4.77428	5.20769	4.96598	4.71919	4.81469	4.66847	4.89894	4.84959	4.79011	4.77713	4.91525	4.70838	5.07701	4.71646	4.93833	4.87835	NA	NA	NA	NA	NA	NA	NA	NA	NA
1623162_at	---	5	4.11826	4.11332	4.19627	3.93148	3.69481	3.81775	4.08541	3.96551	4.1169	4.02316	4.07665	4.00405	3.80021	3.99562	3.87843	3.90057	3.84251	3.73649	3.84071	3.86938	4.07022	3.78256	3.78786	3.89557	3.77169	3.95763	3.80535	3.76969	3.76236	3.93363	4.03846	4.09125	3.91962	3.94576	4.1205	4.02677	NA	NA	NA	NA	NA	NA	NA	NA	NA
1623163_at	CG33543	5	3.34967	3.27259	3.29366	3.42777	3.58072	3.5834	3.57794	3.49339	3.49247	3.48707	3.63216	3.46666	3.56144	3.40815	3.37038	3.56764	3.52299	3.495	3.3635	3.35195	3.39201	3.43552	3.79664	3.59867	3.71329	3.33312	3.5263	3.50541	3.4681	3.57887	3.51875	3.41054	3.45503	3.61843	3.25813	3.71157	NA	NA	NA	NA	NA	NA	NA	NA	NA
1623164_a_at	Eip75B	5	8.76222	8.82422	9.12893	8.42771	8.31719	8.43733	8.24457	8.75297	8.62957	8.09474	8.27337	8.41331	8.66373	9.01231	8.51937	8.82625	8.25997	8.32987	8.29915	8.5356	8.77145	8.11624	8.25424	7.94857	8.60016	8.59959	8.43154	8.3575	8.25729	8.67814	8.06959	8.6522	8.31462	8.29199	8.83457	8.81751	0.435419	0.433324	-0.0641135	0.73982	0.532062	-0.0334526	0.803487	0.551792	0.0306608
1623165_at	thetaTry	5	11.7246	12.121	11.6536	11.648	11.8302	11.5889	12.0067	11.7191	12.0131	11.9307	11.9997	11.5175	11.9637	11.9119	11.7387	11.7785	11.6813	11.9007	12.2731	12.1401	12.0593	12.2519	11.8167	11.6269	12.0956	11.4138	11.2425	11.4105	11.7316	12.0407	11.5463	11.5997	12.1578	11.8986	11.7007	11.6881	0.0817826	0.248431	0.115805	0.328044	0.394448	-0.102286	0.0339194	0.16246	-0.218091
1623166_at	CG6071	5	4.85256	5.29579	4.91491	4.97395	4.9739	4.83451	5.22068	4.87318	4.66268	5.00699	4.95871	4.88633	4.63874	4.96196	4.71657	4.62915	4.69902	4.88612	4.90753	4.68155	4.75394	4.84354	4.51936	4.96742	5.01356	4.73615	5.05909	4.58373	5.19811	4.80893	4.93455	4.79634	4.83749	4.62053	4.89193	4.64672	NA	NA	NA	NA	NA	NA	NA	NA	NA
1623167_at	---	5	6.19382	6.1244	6.21485	5.81466	6.12168	6.0067	6.07687	5.80079	6.33057	6.04204	5.78819	5.98069	5.80712	6.08152	5.97934	6.0291	5.79585	5.78998	6.06399	6.10604	5.8527	6.1435	6.07089	5.73126	5.79624	5.6563	5.89637	5.80378	5.94818	6.10104	6.2324	5.96696	6.21584	6.23344	6.49042	6.36283	NA	NA	NA	NA	NA	NA	NA	NA	NA
1623168_at	TyrRII	5	4.80937	5.00297	4.89389	5.27227	4.90857	4.79591	5.04506	5.15008	4.82705	4.95253	4.88448	5.20328	4.96851	4.99114	4.50101	5.00275	4.83673	5.02371	4.81294	4.74273	5.08234	4.87214	5.02133	5.03672	4.85294	4.99801	4.82682	4.82965	4.86514	4.87712	4.86535	4.89672	5.20176	4.93269	4.78336	5.04989	NA	NA	NA	NA	NA	NA	NA	NA	NA
1623169_at	Rim	5	6.16455	6.31529	6.46245	5.98962	6.05871	6.19874	5.89356	6.14952	6.19795	6.0934	6.04248	6.27649	6.16047	6.3506	6.0551	6.22091	5.89043	5.96872	6.0505	6.16678	6.17105	5.83917	6.09921	6.00271	6.17297	6.30642	6.04276	6.00393	6.13616	6.094	6.07301	6.09366	6.10398	6.00518	6.1645	6.19608	NA	NA	NA	NA	NA	NA	NA	NA	NA
1623170_at	---	5	3.78664	3.74176	3.93902	3.66887	3.82204	3.62765	3.88404	3.68777	3.64491	3.70816	3.77165	3.73737	3.68088	3.90658	3.55804	3.56229	3.5984	3.78517	3.6219	3.78398	4.13894	3.58623	3.74795	3.49365	3.92238	3.76462	3.86354	3.59318	3.46668	3.6542	3.66767	3.95544	3.81161	3.7242	3.79545	3.83547	NA	NA	NA	NA	NA	NA	NA	NA	NA
1623171_s_at	lilli	5	7.27717	7.62396	7.24576	7.72754	7.22682	7.36512	6.65357	7.16181	7.05059	6.7617	6.68018	7.36865	7.55745	7.18906	7.7363	7.20305	7.14644	7.16407	7.14084	7.09094	7.20758	6.45599	6.82343	5.60646	7.42684	7.32759	7.2242	7.1506	7.52652	7.26776	7.20941	7.32774	6.97006	7.47459	6.98087	7.03467	0.404191	0.422222	-0.151772	0.561214	0.476524	0.0648317	0.186031	0.334645	0.216604
1623172_at	---	5	3.20812	3.29505	3.237	3.47326	3.31285	3.29822	3.1323	3.27448	3.24638	3.55946	3.24845	3.15116	3.21788	3.51286	3.29883	3.53339	3.24388	3.33307	3.34864	3.23104	3.25309	3.39584	3.25389	3.08989	3.23063	3.08275	3.16185	3.2424	3.0874	3.20992	3.11839	3.07384	3.10781	3.20715	3.23666	3.19897	NA	NA	NA	NA	NA	NA	NA	NA	NA
1623173_at	CG10013 /// DvirGJ23308	5	3.76497	3.67613	4.11272	3.81395	3.98947	3.90161	3.88061	3.9672	3.85493	3.94408	3.98694	4.36737	3.83293	4.31033	3.80514	3.56756	4.3982	4.02846	4.08855	3.99621	3.92478	4.09796	4.27246	4.30428	4.02098	3.57233	4.30876	4.09316	4.07821	3.98857	3.84209	3.88397	4.07361	4.15105	3.90595	3.9597	NA	NA	NA	NA	NA	NA	NA	NA	NA
1623174_at	---	5	3.6472	3.69391	3.8543	3.60997	3.67277	3.69762	3.6602	3.53408	3.82733	3.89889	3.57775	3.62125	3.40167	3.89094	3.40091	3.61807	3.77748	3.64662	3.8225	3.71472	3.65644	3.68983	3.70497	3.84472	3.66178	3.47563	3.56013	3.5194	3.59931	3.54305	3.68806	3.59767	3.62145	3.89585	3.68117	3.83319	NA	NA	NA	NA	NA	NA	NA	NA	NA
1623175_at	Grx-1	5	4.008	4.09467	4.48194	4.21668	4.08276	4.22137	4.38847	3.87067	4.10013	4.06005	4.04966	4.11307	4.1342	4.14539	4.03743	4.1485	4.05505	4.06607	4.07167	3.95262	4.41063	4.11464	4.01523	3.99155	4.06176	4.06128	3.95808	4.08983	4.01899	4.18968	4.35812	4.10407	3.9435	4.18954	4.08374	4.30334	NA	NA	NA	NA	NA	NA	NA	NA	NA
1623176_at	CG16812	5	9.06999	8.80886	8.90375	8.79642	8.93545	8.7127	8.86267	8.82056	8.89643	8.968	9.04378	8.98846	8.95552	8.93155	8.90434	8.75102	9.07198	8.83052	8.91826	8.66004	8.99893	9.03376	8.84579	8.93045	8.77802	8.77421	9.05164	9.1993	8.85835	8.95275	8.92012	8.77162	8.94487	9.12129	8.88857	8.92618	0.951502	0.590683	0.00209009	0.568	0.478137	0.0316526	0.57952	0.482296	0.0295625
1623177_at	CG33228	5	8.92996	8.50348	8.48672	8.54096	8.59905	8.47058	8.9043	8.69519	8.94667	8.87141	8.83012	8.62492	8.69982	8.58549	8.57155	8.48704	8.92423	8.60423	8.87446	8.42228	8.69241	8.94516	8.79354	8.81427	8.6712	8.5424	9.00861	9.03722	8.73624	8.7665	8.51238	8.61898	8.71632	8.86039	8.824	8.94809	0.986441	0.599473	0.000927895	0.427828	0.430933	0.0699148	0.362938	0.406969	0.0689869
1623178_at	CG14190	5	4.58728	4.24769	4.58386	4.1429	4.65744	4.15165	4.50284	4.47723	4.59855	4.59452	4.45387	4.45857	4.38664	4.4075	4.18606	4.38535	4.1286	4.25992	4.02138	4.43835	4.3909	4.40035	4.59966	4.14036	4.39615	4.14961	4.56344	4.40139	4.02914	4.34398	4.32032	4.35028	4.49949	4.52738	4.29755	4.68082	NA	NA	NA	NA	NA	NA	NA	NA	NA
1623179_at	Spindly	5	7.6749	6.76684	6.36044	6.87775	7.0853	6.29064	6.84834	7.0989	7.32156	7.31308	7.54144	7.18821	7.47308	7.36978	7.09293	6.44527	7.67811	6.49167	7.02935	6.52021	7.0471	7.22021	6.92253	7.08948	7.00498	6.81255	7.60896	7.84282	7.07849	7.26913	7.37051	7.14337	7.1612	7.54951	7.4907	7.16053	0.994018	0.60071	0.00102636	0.135181	0.303114	0.260444	0.157435	0.318957	0.259418
1623180_a_at	Hr46	5	5.31134	5.63477	5.57698	6.01092	5.68696	5.75508	5.42821	5.56623	5.41717	5.44857	5.42877	5.47109	5.70421	5.36888	6.07351	5.84815	5.45827	6.10385	5.71093	6.06441	5.32917	5.52941	5.41652	5.42557	5.71013	5.98227	5.30549	4.97443	5.73641	5.65287	5.56419	5.52939	5.57016	5.58324	5.16633	5.3575	0.211668	0.347199	0.108064	0.651888	0.505067	-0.0503066	0.239965	0.360696	-0.158371
1623181_at	---	5	4.19623	4.43163	3.85645	3.87256	4.11016	3.86436	4.24025	3.68441	4.50491	3.97007	3.82369	4.06771	4.02018	4.06432	3.53575	4.2096	4.10692	4.01096	4.26881	3.89968	4.36289	4.10556	3.99372	3.87695	4.01407	3.9995	4.12786	3.90403	3.86718	3.82979	4.03927	4.10172	4.08718	3.89391	4.20384	4.13778	NA	NA	NA	NA	NA	NA	NA	NA	NA
1623182_at	mRpL51	5	10.1555	10.007	9.94607	9.87769	10.0384	9.92529	10.2712	10.1085	10.3649	10.2078	10.0743	10.0753	9.98617	10.0813	9.89811	10.0991	10.1765	10.0965	10.3223	9.96147	10.2113	10.3631	10.1061	10.0601	10.0358	9.88188	10.0384	10.1667	10.0783	10.1981	10.0133	10.1322	10.0236	10.2208	10.1258	10.4628	0.519525	0.460954	0.0258362	0.675219	0.512256	0.0271611	0.981876	0.598453	0.00132496
1623183_at	---	5	3.93684	3.84578	3.84793	3.972	3.96438	3.87756	3.66909	3.7443	3.79515	3.64706	3.8074	3.75989	3.75024	4.16193	3.81227	3.72566	3.70568	3.73186	3.71171	3.77151	3.64187	3.95982	3.68757	3.7331	3.85594	3.7304	3.4343	3.7461	3.59521	3.6262	3.76297	3.66541	3.63168	3.81857	3.77647	4.00991	NA	NA	NA	NA	NA	NA	NA	NA	NA
1623184_at	---	5	3.6533	3.81792	3.83875	3.66561	4.03271	3.86026	3.93173	4.04549	4.03387	3.85029	3.87502	4.22908	3.69551	4.09394	3.75172	4.09956	4.13917	4.07256	3.88266	4.14738	4.17825	4.1977	4.03543	4.41613	4.0046	3.75584	3.9463	3.90845	3.85284	3.8893	4.05517	3.99505	3.89427	4.06827	3.73123	4.0156	NA	NA	NA	NA	NA	NA	NA	NA	NA
1623185_s_at	jar	5	9.75509	9.87151	9.80948	10.14	9.87246	9.95014	9.89408	10.0345	9.84807	9.86886	9.98337	10.0471	9.95845	9.85921	10.0187	9.95642	9.9286	9.9931	9.97675	10.0048	9.97318	10.0094	9.95999	10.0721	9.92767	10.0617	9.84834	9.86933	9.89386	9.83223	9.84978	9.92076	9.86735	9.88499	9.77712	9.81572	0.125053	0.295135	0.0530074	0.329744	0.395189	-0.0438113	0.0132094	0.0974779	-0.0968186
1623186_at	---	5	3.43827	3.35131	3.42755	3.23031	3.33068	3.3468	3.44122	3.30374	3.39123	3.27734	3.31072	3.24992	3.31903	3.55956	3.18732	3.35204	3.37724	3.28137	3.35507	3.41358	3.49857	3.64638	3.36236	3.46967	3.35391	3.28783	3.28237	3.14974	3.35876	3.07969	3.30896	3.36433	3.46535	3.42536	3.36665	3.41022	NA	NA	NA	NA	NA	NA	NA	NA	NA
1623187_at	---	5	4.77691	4.99183	4.34908	4.58755	4.59735	4.51257	4.45805	4.54235	4.65035	4.389	4.57528	4.4979	4.34856	4.6118	4.40013	4.72928	4.42898	4.55479	4.45273	4.49822	4.56878	4.62583	4.70753	4.27131	4.35832	4.45118	4.49483	4.46344	4.53724	4.7906	4.48593	4.86164	4.4157	4.59642	4.97042	4.62807	NA	NA	NA	NA	NA	NA	NA	NA	NA
1623188_at	CG17208	5	5.02294	4.97402	5.19111	4.71408	4.92915	5.14104	5.01702	4.92924	4.90246	4.67265	4.75691	4.91035	4.8095	4.87505	4.83814	5.13969	5.01922	4.92693	4.84461	4.77733	4.95743	5.14775	4.95213	4.67267	4.74999	4.87953	4.68843	4.72781	4.75475	4.83745	5.05715	4.95509	4.98163	4.83531	5.00985	4.91992	NA	NA	NA	NA	NA	NA	NA	NA	NA
1623189_at	slik	5	10.2686	10.3361	10.1552	10.5743	10.4447	10.4136	10.4818	10.4519	10.315	10.3084	10.5543	10.5037	10.4732	10.2588	10.4911	10.2189	10.4186	10.2862	10.356	10.3902	10.3602	10.324	10.3663	10.5276	10.4706	10.5108	10.406	10.4459	10.4684	10.3497	10.4903	10.2824	10.331	10.3695	10.2175	10.2475	0.598117	0.488376	-0.0280394	0.735693	0.530952	-0.0181637	0.828234	0.55848	0.00987573
1623190_at	CG9168	5	3.44666	3.57789	3.49965	3.54365	3.57852	3.36101	3.47754	3.3956	3.92196	3.50432	3.51231	3.78612	3.39424	3.91898	3.56001	3.455	3.78487	3.30477	3.33047	3.57517	3.57812	3.62747	3.36345	3.45953	3.33741	3.42538	3.44838	3.48981	3.40331	3.5342	3.62784	3.39358	3.41738	3.47591	3.67494	3.60063	NA	NA	NA	NA	NA	NA	NA	NA	NA
1623191_at	Rab9	5	10.1074	10.3174	10.1513	10.4382	10.1603	10.227	10.0849	10.2012	10.0098	9.97379	10.0725	10.073	10.1967	10.1073	10.1343	10.3751	10.0309	10.2771	9.97514	10.408	9.9436	9.92426	10.0776	10.0758	10.3439	10.3335	10.0268	9.86762	10.2127	10.1009	9.89156	10.1821	10.02	9.68894	9.97329	9.65677	0.456391	0.440202	-0.0242482	0.0701277	0.232399	-0.126567	0.152888	0.315508	-0.102319
1623192_at	---	5	4.26199	4.23928	4.25239	4.29692	4.20617	4.03511	3.93972	4.04138	4.41387	4.21046	4.29775	4.05131	3.88683	4.32838	4.19545	4.21973	3.9348	4.22813	4.08462	3.90401	4.41663	4.17747	4.07572	4.38336	4.17315	4.02319	4.10496	4.05667	4.11289	4.16883	4.42879	4.20746	4.19784	4.35978	4.35991	4.48962	NA	NA	NA	NA	NA	NA	NA	NA	NA
1623193_at	CG33123	5	9.99501	9.58192	9.62707	9.61439	9.76352	9.59835	10.0095	9.8375	10.0317	10.0018	10.1501	9.81187	9.90043	9.89423	9.71063	9.63037	9.97098	9.58952	9.73075	9.63508	9.79416	10.0085	9.93993	10.0144	9.86074	9.7899	10.0851	10.0259	9.65247	9.81533	9.81161	9.86486	9.74539	9.93803	9.92027	9.69821	0.767274	0.54066	-0.0169834	0.834828	0.560312	0.0154221	0.644512	0.503095	0.0324055
1623194_at	CG7637	5	11.2975	10.9619	11.204	11.0913	11.459	11.0698	11.6959	11.4466	11.6176	11.7539	11.5786	11.3575	11.1793	11.1169	11.2793	11.193	11.4914	11.2759	11.5317	11.2331	11.3866	11.6318	11.517	11.5405	11.2317	11.2349	11.6041	11.5181	11.5189	11.5703	11.3922	11.4497	11.5142	11.7601	11.4064	11.7172	0.779154	0.544753	-0.013085	0.161028	0.321053	0.115342	0.0145818	0.102683	0.128427
1623195_at	CG17944	5	3.27394	3.59906	3.19262	3.31508	3.44473	3.33342	3.71995	3.14627	3.55109	3.46766	3.43301	3.58266	3.60012	3.23086	3.3126	3.37899	3.55329	3.32597	3.56693	3.47325	3.36693	3.22628	3.195	3.38756	3.4015	3.35609	3.28901	3.25043	3.16306	3.41919	3.535	3.32672	3.3163	3.34147	3.64269	3.35361	NA	NA	NA	NA	NA	NA	NA	NA	NA
1623196_s_at	---	5	5.97932	6.26642	6.06728	5.68886	6.20352	6.1418	6.25418	6.0827	6.3022	5.97635	5.9132	6.06974	5.85456	6.2736	5.92478	5.94392	6.15118	5.91331	6.04225	6.04552	6.14991	6.04625	6.19499	5.98571	5.9603	6.01337	6.12206	6.10289	5.9863	5.9089	6.1573	6.23714	5.85647	6.13021	6.24772	6.45869	NA	NA	NA	NA	NA	NA	NA	NA	NA
1623197_a_at	zormin	5	8.04697	8.84987	8.87229	8.9476	8.23331	8.59335	8.08315	8.36618	7.86974	7.94888	8.21342	8.34593	8.68057	8.51667	8.96072	8.76557	8.13446	8.62501	8.42105	8.89798	8.31438	8.23038	8.4578	8.57535	8.48324	9.03066	7.90398	7.8207	8.4556	8.46065	8.66477	8.50215	8.1484	8.09205	8.01715	8.22196	0.0521082	0.202418	0.184106	0.758052	0.538079	-0.0474476	0.112655	0.282295	-0.231554
1623198_at	---	5	3.72141	3.6848	3.67356	3.94643	3.70013	3.7402	3.76712	3.58221	3.59732	3.5418	3.63776	3.59867	3.83346	3.82462	3.69365	3.81744	3.66885	3.85429	3.77838	3.73601	3.67189	3.69903	3.67706	3.63939	3.70361	3.70609	3.88449	3.72257	3.63226	3.62332	3.41753	3.98638	3.55942	3.69009	3.93869	3.83005	NA	NA	NA	NA	NA	NA	NA	NA	NA
1623200_at	fng	5	8.87193	9.48345	9.32461	9.38254	9.12941	9.27909	8.89481	9.09061	8.83653	8.955	8.99111	9.1272	8.91841	9.14724	9.31994	9.43422	8.85663	9.45216	9.19418	9.44184	8.95331	9.03496	9.09665	9.2581	9.18116	9.4852	8.98827	8.70992	9.30942	9.06649	9.24893	9.15066	9.02908	8.93375	9.0519	8.82123	0.30633	0.386112	0.0617792	0.714394	0.523784	-0.0325221	0.373067	0.410572	-0.0943013
1623201_at	CG5783	5	7.48126	8.24791	7.94903	8.27426	7.74095	8.19623	7.69752	7.74685	7.43144	7.50952	7.45116	7.77356	7.68405	7.88466	7.89853	8.07918	7.54341	8.12329	7.80113	8.1357	7.55777	7.4956	7.51295	7.988	7.79103	7.89837	7.61094	7.28418	7.75286	7.65786	7.69285	7.55718	7.48001	7.06223	7.44695	7.72598	0.783181	0.545675	0.0170479	0.0568447	0.211478	-0.211606	0.0220459	0.128783	-0.228654
1623202_at	CG14113	5	3.98656	3.90659	3.89688	3.98192	3.95026	3.86088	3.91543	3.59445	4.19207	3.99743	3.90951	3.98692	3.73479	4.11758	3.82108	3.99422	3.84839	3.83126	3.83627	3.99865	3.92015	4.03445	3.86969	3.82615	3.97157	3.60598	4.0214	3.97876	3.81039	3.93795	4.07952	3.9688	4.00566	3.87528	3.76643	3.894	NA	NA	NA	NA	NA	NA	NA	NA	NA
1623203_at	CG7456	5	9.02777	9.16454	8.84839	9.11359	9.10945	9.1124	9.31013	9.0984	9.05951	9.19848	9.18114	9.12633	9.0796	9.06985	9.1182	9.01426	9.15239	9.05385	9.12417	9.06762	9.0142	9.19774	9.07836	9.32525	9.16376	9.13034	9.22607	9.21367	9.09379	9.14842	9.17283	8.99394	9.11332	9.20003	9.0757	8.87951	NA	NA	NA	NA	NA	NA	NA	NA	NA
1623204_at	CG15728	5	3.9851	3.9833	4.22018	3.99773	4.10258	3.7773	3.88181	4.27808	4.38474	4.02559	4.0465	4.028	4.14744	4.15598	4.09933	3.83875	4.08596	4.15241	4.1228	3.92588	4.16073	4.57846	4.12268	4.01254	4.02784	4.03458	3.98144	4.13419	4.12708	4.10865	4.03467	4.08794	4.10776	4.1279	4.13043	3.90185	NA	NA	NA	NA	NA	NA	NA	NA	NA
1623205_at	---	5	3.40992	3.71004	3.7892	3.30025	3.60306	3.59418	3.84597	3.31543	3.62414	3.5238	3.50176	3.64018	3.51669	3.64009	3.41865	3.67856	3.54855	3.47797	3.53457	3.5949	3.72618	3.78305	3.7459	3.5238	3.63017	3.62205	3.57059	3.40925	3.40843	3.66599	3.60702	3.6284	3.44623	3.63867	3.78782	3.80339	NA	NA	NA	NA	NA	NA	NA	NA	NA
1623206_a_at	eya	5	7.66796	8.20272	7.62945	8.29688	8.4714	8.33067	8.6125	8.21938	8.22183	8.60907	8.30088	8.23089	7.93947	7.85353	8.09135	8.18042	8.16555	8.32304	8.59592	8.29503	8.06232	8.47617	8.36228	8.39005	8.27459	8.30692	8.24845	7.72019	8.33457	8.25003	8.11466	8.23886	8.33546	8.30612	8.11714	8.07158	0.943399	0.588978	-0.00487302	0.718585	0.525579	-0.0395875	0.707632	0.522241	-0.0347144
1623207_at	CG3548	5	8.86377	8.21113	8.28134	8.19892	8.49397	7.93676	8.45746	8.44179	8.64539	8.74886	8.90846	8.61894	8.69912	8.54851	8.35873	7.78531	8.86787	8.21996	8.41381	7.95282	8.33639	8.64898	8.51019	8.41463	8.35721	8.06587	8.91243	9.21159	8.43794	8.39997	8.39995	8.51616	8.63232	8.8688	8.53044	8.48815	0.334488	0.396986	-0.087539	0.508358	0.457093	0.084503	0.278934	0.375807	0.172042
1623209_at	CG8833	5	7.36869	6.97044	7.01808	6.89482	7.11328	6.9698	7.24892	7.05594	7.09145	7.27206	7.17863	7.25499	7.28083	7.15271	6.83584	6.9238	7.48101	6.99154	7.05917	6.73607	7.13305	7.24198	7.19451	7.29184	7.14582	6.97957	7.52432	7.61194	6.9523	7.13271	7.03261	7.12263	7.17891	7.26169	7.04234	7.04529	NA	NA	NA	NA	NA	NA	NA	NA	NA
1623210_at	dimm	5	3.71483	3.83725	3.6101	3.6344	4.12374	3.85336	3.77125	3.76762	3.98659	3.73117	3.801	3.7685	3.79657	3.72513	3.70304	3.95894	3.96531	3.82522	3.7351	3.7833	3.79013	3.55039	3.92273	3.81234	3.79063	3.73555	3.73229	3.81276	3.74206	3.99245	3.72555	3.61844	3.74767	3.77347	3.90254	3.91882	NA	NA	NA	NA	NA	NA	NA	NA	NA
1623211_at	CG17234	5	3.56868	3.39898	3.2581	3.37235	3.70168	3.36284	3.45397	3.49044	3.31989	3.41187	4.14115	3.39336	3.69967	3.47557	4.00693	3.53379	7.85848	3.11076	3.47041	3.2038	3.38143	3.33816	3.35677	3.22249	3.16372	3.25954	3.36443	7.89832	3.55887	3.57236	3.52067	5.05043	3.21327	3.16919	3.4804	3.39808	0.404779	0.422397	0.315412	0.348322	0.40149	0.397997	0.886153	0.574088	0.082585
1623212_s_at	tamo	5	8.93068	9.2233	9.115	9.35354	8.85174	9.22568	8.91403	9.00373	8.87997	8.72581	8.8129	9.30359	8.77276	8.79804	9.01783	9.06117	8.72495	8.91117	8.89174	9.01329	8.92195	8.8473	8.60934	9.16487	9.05069	8.90031	8.67767	8.58237	8.95176	8.8761	8.95241	8.89887	8.65662	8.69293	8.78961	8.96786	0.0141381	0.100842	-0.133799	0.0256176	0.140346	-0.195232	0.390108	0.417288	-0.0614338
1623213_at	---	5	3.98899	3.71165	4.11238	3.56384	3.8843	3.74153	3.71922	3.7625	3.67772	3.45359	3.64132	3.5422	3.61446	3.78192	3.50549	3.88542	3.6219	3.74508	3.72475	3.65764	3.87805	3.5451	3.83435	3.46056	3.70902	3.50395	3.78624	3.74681	3.7335	3.59189	3.98102	3.99464	3.61183	3.7102	3.69637	4.0516	NA	NA	NA	NA	NA	NA	NA	NA	NA
1623214_at	CG9669	5	10.9754	10.8267	10.9953	10.8727	11.0227	10.9473	11.1267	11.0313	11.1104	11.0862	11.111	10.8949	10.8727	10.8759	10.8123	10.9697	11.1261	10.9292	11.0996	11.0235	10.9995	11.1498	11.1034	11.096	10.9393	10.8784	11.0631	11.0464	10.9788	10.9708	10.8614	10.8557	11.0459	11.0486	10.9489	11.0354	0.879754	0.572416	0.00475056	0.480738	0.449659	-0.0273252	0.437391	0.433854	-0.0320758
1623215_at	---	5	4.4707	4.47545	4.37119	4.07407	4.10022	4.46685	4.33577	4.39498	4.4122	4.08155	3.97017	4.18931	3.97646	4.31169	4.14319	4.47616	4.0179	4.22425	4.15942	4.19564	4.25189	4.21461	4.11768	4.20747	4.09442	4.40385	4.33303	4.28325	4.25994	4.44481	4.28992	4.10109	4.00875	4.31437	4.21764	4.16993	NA	NA	NA	NA	NA	NA	NA	NA	NA
1623217_at	trpml	5	3.22255	3.47741	3.42114	3.21594	3.1014	3.10604	3.11673	3.20961	3.05209	3.14211	3.15281	3.24608	3.28756	3.23684	3.12359	3.43462	3.31994	3.21318	3.45849	3.10398	3.21521	3.32505	3.38885	3.22656	3.0035	3.11788	3.04429	3.26388	3.22162	3.33312	3.08925	3.32669	3.3117	3.30815	3.31074	2.92952	NA	NA	NA	NA	NA	NA	NA	NA	NA
1623218_s_at	---	5	9.65542	8.37806	8.50789	8.87907	8.95597	8.3656	9.06353	9.32873	9.27195	9.42555	9.70467	9.58196	9.66463	9.32415	9.11673	8.13406	9.76692	8.62651	9.11428	8.60482	9.21199	9.45596	9.25601	9.25629	9.04908	8.41899	9.73798	10.1033	8.94176	9.05388	8.9931	9.16063	9.48126	9.74689	9.46585	9.27821	0.833046	0.559605	0.0344951	0.276507	0.374393	0.192707	0.492348	0.452191	0.158212
1623219_at	---	5	4.0829	4.20413	4.03278	4.12222	4.4462	4.22545	4.28561	4.26396	4.23594	4.20488	4.03671	4.40393	4.04081	4.14775	4.02445	4.47127	4.11672	4.27254	4.29082	3.99824	4.37505	4.09814	4.09537	4.33348	4.04938	3.93875	4.3031	4.0822	4.03908	4.12172	4.31576	4.10614	4.32244	4.29705	4.33619	4.44332	NA	NA	NA	NA	NA	NA	NA	NA	NA
1623220_at	---	5	3.66489	4.11174	3.93045	3.76557	4.09669	3.72222	4.04471	3.90411	4.38133	3.77112	3.92128	3.92199	3.79418	3.63554	3.86513	3.66277	4.00551	3.88665	3.80729	3.88207	4.03902	3.81314	4.06153	3.91393	3.82435	3.77341	3.8417	4.10573	3.67501	3.86959	3.76305	3.99631	3.79576	4.24012	3.72045	3.93764	NA	NA	NA	NA	NA	NA	NA	NA	NA
1623221_at	---	5	3.94733	4.02918	4.07925	3.81065	3.92572	3.81743	3.76671	4.01422	4.09581	3.92671	3.87652	3.95365	3.90974	3.8884	3.64561	3.62294	3.81444	3.85384	3.68968	3.98607	4.10866	3.85841	4.17535	3.73985	3.60224	3.75266	3.98592	3.73583	3.60301	4.10743	3.93707	3.97999	3.79664	3.83897	3.95281	4.17447	NA	NA	NA	NA	NA	NA	NA	NA	NA
1623222_s_at	His3.3B	5	12.6325	12.3671	12.4603	12.2887	12.2694	12.2308	12.2962	12.3809	12.7148	12.2754	12.3394	12.4529	12.2188	12.5557	12.3575	12.369	12.4029	12.0776	11.8703	12.0544	12.493	12.29	12.1454	12.1495	12.2919	12.2331	12.3812	12.5295	12.4016	12.545	12.5128	12.4621	12.3035	12.5072	12.7299	12.055	0.0370098	0.170271	-0.143691	0.809427	0.553382	0.0203602	0.0921513	0.260662	0.164051
1623223_at	---	5	4.17897	4.14744	3.88493	4.43087	3.99039	4.24406	3.8541	3.83549	4.08814	3.89916	3.7776	4.25183	4.08115	4.047	4.2265	4.30769	3.64755	4.31128	3.88343	4.06272	3.8607	4.02117	3.87393	3.42608	4.14737	3.86356	3.71744	3.4416	4.33082	4.02678	4.28256	3.91067	4.01731	3.89546	3.89043	3.96339	NA	NA	NA	NA	NA	NA	NA	NA	NA
1623224_at	Eig71Eb	5	2.98133	3.14181	3.4009	3.24676	3.0365	3.43826	3.41496	3.26561	3.14427	3.35182	3.22651	3.30179	3.30811	3.40531	3.28969	3.63293	3.05368	3.46087	3.34502	3.33995	3.29128	3.25458	3.20218	3.18702	3.09554	3.11028	3.23849	3.21756	3.31525	3.32523	3.29419	3.1461	3.24979	3.42276	3.24954	3.21331	NA	NA	NA	NA	NA	NA	NA	NA	NA
1623225_s_at	CG7611	5	11.0333	10.9808	10.7888	10.9938	10.8343	10.8853	10.8949	10.9263	10.9199	10.8473	10.9945	10.8434	10.9251	10.9359	10.8296	10.8227	10.9703	10.9157	10.8923	10.9451	10.999	10.8311	10.8849	10.9849	11.0641	10.9282	10.9099	10.974	10.8845	10.9071	10.9291	10.9816	10.983	10.842	10.8378	10.8535	NA	NA	NA	NA	NA	NA	NA	NA	NA
1623226_at	CG10154	5	5.04675	6.06486	5.33633	6.74064	6.11697	5.76525	5.01014	5.55196	5.49294	5.70138	4.9891	5.27472	5.27342	5.22057	5.47228	5.54911	5.54241	5.63276	5.4555	5.92077	5.0271	5.71565	5.04189	5.10505	5.14813	6.12722	5.62079	5.49028	5.95373	6.34903	5.47333	5.80648	6.22058	5.60951	5.7181	5.83594	0.243788	0.36245	-0.177878	0.255743	0.36612	0.188507	0.0195296	0.120588	0.366385
1623227_s_at	Hil	5	6.39399	6.90629	6.91627	6.87869	6.34292	6.47622	6.16841	6.53439	5.93778	6.25159	6.25572	6.3765	6.57276	6.54241	6.58509	6.86221	6.21671	6.61995	6.47139	6.67353	6.41087	6.32063	6.38402	6.60539	6.3967	6.62363	5.94806	5.95062	6.71863	6.46918	6.54426	6.12755	6.01868	5.84747	6.1394	5.87907	0.352055	0.403289	0.0688493	0.094931	0.263551	-0.231292	0.0239635	0.134878	-0.300142
1623228_at	---	5	3.23157	3.23796	3.33072	3.08833	3.07999	3.07776	3.28124	3.21723	3.35777	3.16883	3.23101	3.20109	3.15183	3.23886	3.03698	3.38007	3.23969	3.05463	3.02964	3.18768	3.11557	3.06835	3.36822	3.25603	3.17135	3.17432	3.30264	3.17311	3.18372	3.14818	3.08116	3.20592	3.10157	3.17854	3.39135	3.27644	NA	NA	NA	NA	NA	NA	NA	NA	NA
1623230_s_at	---	5	4.54668	4.6194	4.49213	4.26814	4.51251	4.29092	4.3517	4.4646	4.53481	4.39322	4.41228	4.43883	4.25424	4.53519	4.63688	4.88086	4.67785	4.30496	4.12812	4.55209	4.77281	4.47298	4.48691	4.28862	4.49087	4.04493	4.49156	4.68291	4.36141	4.31958	4.49999	4.47306	4.47257	4.59374	4.28126	4.60714	NA	NA	NA	NA	NA	NA	NA	NA	NA
1623231_at	dyn-p25	5	8.87447	8.96699	9.00487	9.10154	8.93218	9.09804	9.026	9.0008	9.02684	8.92924	8.7771	9.05039	8.92554	9.01401	9.11004	9.09968	9.04182	9.16873	9.18782	9.07627	9.04316	9.08584	8.89086	9.15165	8.8982	8.91011	8.87072	8.86555	9.06793	9.09977	9.02332	8.92278	9.04518	8.99836	9.14089	9.23923	NA	NA	NA	NA	NA	NA	NA	NA	NA
1623232_at	---	5	3.63741	3.48222	3.2287	3.38224	3.42751	3.31374	3.49299	3.35391	3.70765	3.43833	3.42759	3.27715	3.57382	3.33959	3.37677	3.55863	3.30784	3.56605	3.2661	3.4238	3.6652	3.50737	3.26475	3.26408	3.30673	3.32873	3.39553	3.68113	3.29404	3.24391	3.35413	3.50815	3.31953	3.61605	3.46032	3.48756	NA	NA	NA	NA	NA	NA	NA	NA	NA
1623233_at	Rab26	5	5.18132	5.55665	5.8475	5.55789	5.57606	5.46475	5.28259	5.20653	5.4121	5.22344	5.33929	5.18335	5.3602	5.28298	5.42542	5.54938	5.11694	5.54823	5.4259	5.41018	5.23099	5.5661	5.25905	5.22039	5.32817	5.64854	5.41453	5.02754	5.48566	5.4445	5.44231	5.6117	5.22285	5.45987	5.27552	5.69062	NA	NA	NA	NA	NA	NA	NA	NA	NA
1623234_s_at	Calx	5	8.30978	8.81028	8.70835	9.02698	8.68065	8.85924	8.7538	8.79398	8.46159	8.93138	8.8507	8.85079	8.69104	8.65505	8.91326	8.85809	8.80913	8.83601	8.93853	9.00081	8.5309	8.96309	8.82014	9.13777	8.85342	9.09289	8.69719	8.38814	8.81274	8.46761	8.91942	8.77957	8.71439	8.71605	8.55961	8.31459	0.085128	0.252612	0.0930239	0.573757	0.480173	-0.0601577	0.140743	0.307395	-0.153182
1623235_at	sec10	5	8.43941	8.31392	8.13166	8.24296	8.3021	8.328	8.41029	8.31112	8.25642	8.51631	8.62103	8.19738	8.33328	8.40529	8.3257	8.26046	8.44499	8.41703	8.53372	8.37953	8.28454	8.6214	8.31964	8.7525	8.39231	8.31989	8.52579	8.55846	8.40745	8.4573	8.37056	8.34996	8.52857	8.45371	8.42136	8.2209	0.170259	0.325862	0.0839555	0.149122	0.312886	0.0779715	0.927828	0.585311	-0.00598395
1623236_at	---	5	4.21188	4.76093	4.45514	4.23779	4.39289	4.34531	4.29437	4.56527	4.37123	4.26823	4.29081	4.35834	4.19617	4.42814	4.18174	4.69567	4.128	4.19962	4.29324	4.3168	4.58257	4.5212	4.68557	4.25933	4.31494	4.1911	4.35561	4.20295	4.18428	4.21881	4.44816	4.45992	4.44799	4.53276	4.46325	4.50106	NA	NA	NA	NA	NA	NA	NA	NA	NA
1623237_at	Bub1	5	9.03605	8.83381	8.78783	8.79119	8.8197	8.6494	8.82624	8.85773	8.97619	8.80783	9.0752	9.01087	8.94775	8.95848	8.86001	8.63932	9.09359	8.55361	8.7411	8.69203	8.68701	8.86106	8.82225	8.77493	8.89363	8.81436	9.06999	9.17394	8.80835	8.69121	8.71898	8.80135	8.83807	9.02764	8.91165	8.73267	0.180945	0.331448	-0.0700773	0.988893	0.600028	0.000817391	0.258085	0.367079	0.0708947
1623238_at	CG5618	5	11.0196	11.1949	11.4759	11.3124	11.0507	11.2287	11.4444	11.2843	10.8011	11.2425	11.001	11.2535	10.83	11.211	11.4041	11.4248	10.7421	11.2696	11.3384	11.4792	10.7739	11.2263	10.9802	11.3492	11.278	11.6135	10.953	10.2019	11.2226	11.2673	11.304	11.1273	10.8369	11.0661	10.9562	10.9269	0.564435	0.477265	-0.023366	0.286074	0.378453	-0.129607	0.455582	0.439925	-0.106241
1623239_at	prod	5	8.90933	8.53223	8.56077	8.62623	8.63116	8.45965	8.62958	8.67315	8.59842	8.71849	8.8096	8.73228	8.95232	8.65856	8.69244	8.40724	8.81956	8.5655	8.53375	8.46565	8.66597	8.72175	8.64246	8.55755	8.66352	8.64377	8.89365	9.1107	8.65184	8.62812	8.74494	8.59467	8.598	8.80803	8.55182	8.57951	0.707029	0.521964	-0.0165109	0.458219	0.441048	0.0489739	0.381663	0.41349	0.0654848
1623240_at	---	5	4.08755	4.11236	4.19269	3.88624	4.25161	4.27087	4.14174	3.91733	4.11843	4.02838	4.03319	4.01391	3.98326	4.04672	4.02306	3.96269	4.00034	4.15495	4.02606	3.80966	4.11415	4.13371	4.09687	3.86042	3.90348	3.93497	3.67489	4.08527	4.13947	4.07193	3.94774	3.82062	4.02085	4.02905	4.18742	4.32925	NA	NA	NA	NA	NA	NA	NA	NA	NA
1623241_s_at	CG30104	5	9.31096	9.51134	9.37648	9.54979	9.45662	9.78012	9.59988	9.41626	9.65953	9.496	9.38009	9.38871	9.33772	9.51698	9.49441	9.70202	9.59074	9.84833	9.61692	9.76903	9.5447	9.57559	9.29865	9.75518	9.70076	9.57837	9.27163	9.15105	9.42454	9.4765	9.38223	9.25445	9.49817	9.22667	9.29623	9.35185	0.0504101	0.199686	0.0937065	0.0896273	0.257881	-0.109446	0.0219089	0.128266	-0.203153
1623242_at	CG13380 /// CG4174	5	3.55194	3.35499	3.16449	3.54253	3.71114	3.51209	3.61263	3.57193	3.6995	4.18611	4.37605	3.89822	3.64497	3.53933	3.58871	3.15026	4.3492	3.49265	3.50267	3.51235	3.50108	3.64087	3.72455	4.11001	3.66978	3.39675	4.28128	3.61399	4.01552	4.07879	3.90079	3.86589	3.87124	4.13983	3.84199	3.25903	0.753027	0.536391	-0.0354149	0.294009	0.380854	0.146104	0.185713	0.334645	0.181519
1623243_at	CG5656	5	4.82654	5.23026	5.2366	5.01031	5.06558	5.35258	4.87808	5.03785	5.19804	4.80264	4.69229	5.26369	4.93267	5.33243	5.29606	5.45682	4.81824	5.22171	4.9957	5.13754	5.25576	4.98545	5.20743	5.10247	4.63022	4.8268	4.95041	4.88785	5.07654	4.6215	5.28598	5.15906	5.26589	4.99416	5.43958	5.19457	NA	NA	NA	NA	NA	NA	NA	NA	NA
1623244_at	Ect4	5	9.84608	10.3996	10.4465	10.5043	10.1224	10.5375	9.83192	9.99796	9.61338	9.88023	9.92595	10.1665	10.1964	9.96715	10.4107	10.3532	10.022	10.397	10.2761	10.5818	9.9723	9.96738	10.2404	10.2993	10.143	10.5299	9.84522	9.51394	10.3286	9.98715	10.2995	10.2112	10.147	9.98512	9.93515	10.1692	0.201365	0.341737	0.117616	0.913789	0.58179	-0.014781	0.26456	0.369827	-0.132397
1623245_at	---	5	3.39768	3.43754	3.46242	3.43813	3.38211	3.22083	3.59939	3.01448	3.3717	3.31239	3.36387	3.40292	3.37198	3.27464	3.47677	3.53146	3.27952	3.19941	3.3481	3.43002	3.55686	3.40361	3.33436	3.4532	3.19225	3.20567	3.21438	3.23587	3.25056	3.37969	3.3926	3.38292	3.23378	3.3466	3.38191	3.501	NA	NA	NA	NA	NA	NA	NA	NA	NA
1623246_at	CG6475	5	3.54886	3.58474	3.71827	3.42866	3.49025	3.58999	3.68969	3.44926	3.5451	3.52964	3.5896	3.45417	3.53254	3.7039	3.39714	3.37712	3.55502	3.48225	3.66597	3.51115	3.39609	3.34818	3.66689	3.52398	3.31679	3.83974	3.41327	3.62021	3.38103	3.5777	3.71882	3.59727	3.68738	3.72035	3.74865	3.5586	NA	NA	NA	NA	NA	NA	NA	NA	NA
1623247_at	CG10420	5	8.2867	7.94366	8.42412	8.37022	8.24112	8.21528	8.3427	8.64559	8.32411	8.27793	8.44465	8.39374	8.25243	8.35226	8.58141	8.2464	8.56805	8.12643	8.24022	8.36896	8.13666	8.27474	8.44658	8.44993	8.12159	8.64777	8.49526	8.87144	8.30187	8.30221	8.21481	8.20071	8.34512	8.5173	8.40613	7.60399	0.850998	0.564459	0.011189	0.932026	0.586107	0.00986459	0.990154	0.600153	-0.00132439
1623248_s_at	---	5	3.75364	3.59961	3.58712	3.27889	3.56143	3.66377	3.3152	3.52369	3.51624	3.57676	3.47677	3.31773	3.57038	3.7409	3.38529	3.33715	3.59878	3.65001	3.3154	3.75357	3.58721	3.65424	3.84344	3.57246	3.65722	3.63696	3.51874	3.54526	3.47253	3.59849	3.4425	3.69255	3.52813	3.4506	3.71553	3.70869	NA	NA	NA	NA	NA	NA	NA	NA	NA
1623249_s_at	---	5	3.52654	3.50507	3.32016	3.36754	3.559	3.48424	3.68729	3.60925	3.69484	3.46002	3.42087	3.50097	3.34016	3.60584	3.29815	3.51922	3.35569	3.48109	3.41469	3.36695	3.67501	3.68047	3.52189	3.39862	3.457	3.18517	3.45679	3.64982	3.41317	3.29766	3.61074	3.52973	3.45006	3.5826	3.49826	3.63648	NA	NA	NA	NA	NA	NA	NA	NA	NA
1623250_at	CG18591	5	11.1919	10.7403	10.8215	10.9143	11.164	10.849	11.1905	11.0729	11.3229	11.3706	11.3701	11.2147	11.227	11.0227	10.9723	10.7079	11.4117	10.9298	11.2134	10.8125	11.2247	11.2874	11.2166	11.2192	11.1064	10.9787	11.4779	11.5511	11.1359	11.1725	11.0262	11.1185	11.2484	11.4675	11.215	11.3315	0.970293	0.595509	0.00188361	0.127815	0.297255	0.133898	0.172948	0.326925	0.132015
1623251_at	CG14450	5	8.3258	7.99172	7.98364	8.00598	8.00659	7.88158	8.07267	7.87993	8.14594	8.18028	8.12947	8.04318	8.14553	8.15634	8.02783	7.94254	8.11137	8.05904	8.06333	7.93998	8.06154	8.14821	7.99202	8.15958	7.97495	7.96536	8.21491	8.38856	7.9462	8.07103	7.85835	7.97138	8.10604	8.18712	8.22779	7.99088	NA	NA	NA	NA	NA	NA	NA	NA	NA
1623252_a_at	kdn	5	11.035	11.2387	11.2896	11.3191	11.1838	11	11.413	11.4456	10.8754	11.4971	11.4608	11.4984	11.3173	11.1998	11.5896	11.3055	11.2381	11.0431	11.4588	11.4169	10.9706	11.4942	11.53	11.1744	11.2382	11.516	11.0173	11.0379	11.2606	10.9222	11.3474	11.2226	10.9531	11.57	11.0584	11.3899	0.400523	0.420908	0.0401764	0.338842	0.399084	-0.0602315	0.20253	0.342619	-0.100408
1623253_at	---	5	3.90654	3.72339	3.64894	3.6299	3.98794	3.90019	3.91381	3.94924	4.14117	3.87117	3.64905	3.76969	3.84233	3.65555	3.64839	3.85254	3.89664	3.77896	3.7663	3.75354	4.06001	3.87699	3.93239	3.44127	3.64652	3.57722	3.88471	3.61387	3.51916	3.63836	3.65163	3.85052	3.75357	3.96074	3.7115	3.70482	NA	NA	NA	NA	NA	NA	NA	NA	NA
1623254_s_at	CG31531	5	8.17579	8.52305	8.33777	8.94481	8.58754	8.69505	8.17867	8.48455	7.93378	8.45736	8.39885	8.49356	8.58264	7.92174	8.86241	8.56539	8.35648	9.02022	8.50086	8.92425	8.43129	8.49411	8.43549	8.57677	8.47268	8.95118	8.38283	7.85336	8.81628	8.62719	8.63586	8.58539	8.71945	8.4072	8.31785	7.95865	0.274936	0.373495	0.121739	0.765881	0.540265	0.0430942	0.594731	0.487095	-0.0786446
1623255_at	---	5	4.67575	4.51971	4.6105	4.57043	4.74907	4.53261	4.59975	4.46744	4.86471	4.52899	4.56026	4.62648	4.52568	4.72764	4.59301	4.82648	4.72208	4.75021	4.87338	4.66026	4.77544	4.51935	4.76978	4.69982	4.68686	4.65507	4.55646	4.96755	4.68678	4.40303	4.64735	4.64763	4.74811	4.6851	4.88768	4.79889	NA	NA	NA	NA	NA	NA	NA	NA	NA
1623256_at	GstE1	5	10.6041	11.0153	11.5317	11.1837	10.4577	10.5192	10.4539	10.9362	10.7614	10.3966	11.0277	10.6225	10.5515	10.91	10.4398	10.6983	10.0428	10.5412	10.3379	10.3427	10.376	10.7002	9.82399	10.4046	10.8424	10.3966	10.7701	10.8154	10.9014	10.6048	10.7646	10.7689	10.5077	10.6361	10.8125	10.8433	0.0161788	0.108591	-0.361747	0.539939	0.468698	-0.0705319	0.0279781	0.147193	0.291215
1623257_a_at	CG17665	5	9.86517	9.73066	9.6704	9.7404	9.76139	9.67584	9.8183	9.73832	9.72759	9.75804	9.85716	9.67191	9.79081	9.85869	9.66773	9.59458	9.75301	9.61996	9.54725	9.6315	9.61989	9.71148	9.61197	9.8093	9.79084	9.67257	9.82959	9.89653	9.71043	9.78815	9.92257	9.73025	9.60146	9.82932	9.7526	9.39854	0.0912032	0.259814	-0.0665822	0.8433	0.562502	-0.00769315	0.356343	0.404719	0.058889
1623258_at	CG12493	5	7.84284	8.31707	8.48251	8.54924	8.18534	8.45953	7.93694	8.15024	7.95944	8.04551	7.89613	8.02106	8.14035	7.76732	8.54096	8.56163	8.0713	8.5481	8.558	8.67752	8.21199	8.35926	8.27626	8.22456	8.02971	8.624	7.91951	7.52357	8.34858	8.07745	7.96772	8.02822	8.24548	7.96436	7.91769	8.09199	0.0781057	0.244238	0.174282	0.430411	0.431527	-0.0922979	0.0907101	0.259287	-0.26658
1623259_at	SP1070	5	3.33987	3.18673	3.7054	3.36626	3.56514	3.25458	3.44984	3.13845	3.7949	3.41196	3.18422	3.36563	3.61376	3.42847	3.44649	3.42898	3.51538	3.39292	3.31737	3.3949	3.5074	3.62562	3.56218	3.46625	3.32234	3.40127	3.38719	3.34607	3.17602	3.32137	3.2668	3.25831	3.29345	3.32276	3.32735	3.55834	NA	NA	NA	NA	NA	NA	NA	NA	NA
1623260_at	---	5	3.29422	3.35718	3.32621	3.46973	3.32928	3.14429	3.23745	3.3202	3.22566	3.31911	3.11397	3.4766	3.31047	3.34389	3.1669	3.22221	3.30754	3.14965	3.30723	3.29678	3.35586	3.38454	3.2356	3.14174	3.38193	3.31801	3.19648	3.14011	3.1562	3.21108	3.18657	3.13177	3.15986	3.18941	3.29639	3.44574	NA	NA	NA	NA	NA	NA	NA	NA	NA
1623261_at	RabX4	5	7.06223	7.5622	7.49906	7.42037	7.16813	7.45921	6.93119	7.08325	6.72301	6.96439	6.78193	7.05407	7.32968	7.22865	7.30412	7.30951	6.9548	7.60109	7.24312	7.48745	6.9927	7.00655	6.9408	7.13903	7.38033	7.50147	6.87834	6.65544	7.27461	7.24286	7.3426	7.26757	6.98999	6.92229	6.82972	7.00486	0.331325	0.395772	0.0690389	0.740964	0.532431	-0.0349135	0.229885	0.35609	-0.103952
1623262_at	RhoGEF3	5	4.46378	4.86719	4.88217	4.59822	4.74748	4.81093	4.55023	4.85415	4.64443	4.5905	4.62989	4.72143	4.72377	4.93004	4.66634	4.74541	4.60325	4.67773	4.7107	4.65718	4.93845	4.59247	4.9393	4.28294	4.71108	4.66084	4.52675	4.62679	4.56769	4.82869	4.77851	4.7497	4.85738	4.81231	4.78675	4.67426	NA	NA	NA	NA	NA	NA	NA	NA	NA
1623263_at	---	5	3.2463	3.68693	3.4329	3.154	3.33418	3.44192	3.41804	3.69986	3.5689	3.50916	3.44874	3.34834	3.21924	3.46725	3.2864	3.39518	3.52402	3.52453	3.4994	3.55709	3.62116	3.86343	3.54707	3.46675	3.56181	3.33122	3.42279	3.54512	3.39114	3.53737	3.67712	3.73258	3.57565	3.55398	3.56867	3.59978	NA	NA	NA	NA	NA	NA	NA	NA	NA
1623264_at	CG3493	5	8.86828	9.04339	8.98076	8.93119	8.72791	8.83965	8.78312	8.83634	8.85239	8.65064	8.86685	8.92019	8.70691	8.9958	8.80488	8.90871	8.6732	8.78542	8.76614	8.78585	8.87864	8.73344	8.78603	8.87525	8.83855	8.74381	8.76488	8.87228	8.75611	8.8374	8.86736	8.79677	8.62053	8.73112	8.87752	8.88938	0.0316243	0.156603	-0.0500374	0.129928	0.299134	-0.0587488	0.816828	0.555706	-0.00871139
1623266_at	CG14180	5	4.19038	4.8084	4.78669	4.46076	4.15767	4.45396	3.84947	4.02767	3.98798	3.76346	4.14185	3.81345	4.3333	4.3971	4.37011	4.60896	3.22007	4.46754	4.13163	4.04654	3.82937	3.95535	3.87918	3.96154	4.08204	4.40317	3.98309	3.77283	4.43446	4.13391	4.54916	4.27411	3.88292	3.71595	4.14621	3.79419	NA	NA	NA	NA	NA	NA	NA	NA	NA
1623267_at	unc79	5	6.95378	7.48232	7.33884	7.23277	6.70716	7.17474	6.20751	6.65989	6.38685	6.4589	6.43449	6.38893	6.87389	6.58762	6.99882	7.41313	5.95361	7.3194	6.98259	7.0449	6.73018	6.22836	6.62031	6.51383	7.01753	6.99186	6.28646	6.13236	7.05639	7.24847	6.95453	6.66645	6.42083	6.51033	6.52045	6.79559	0.924952	0.58453	-0.0132951	0.675255	0.512256	-0.0687448	0.753802	0.536607	-0.0554497
1623268_a_at	CG33785 /// CG33786	5	8.85975	8.69181	9.02221	8.65132	8.86744	8.79293	9.10361	8.95637	9.18202	9.01538	9.0288	9.0731	8.81365	8.98115	8.96819	8.81995	9.07515	8.85794	9.00298	8.86919	9.07431	9.25813	9.1012	9.17533	8.66034	9.06782	9.13157	9.06089	8.95033	8.95573	8.90723	9.00924	8.86782	9.07923	9.02699	9.04435	0.153946	0.315841	0.0627023	0.505584	0.456339	0.0430676	0.668165	0.510233	-0.0196347
1623269_at	---	5	3.02836	3.32455	3.39174	3.14231	3.28144	3.16084	3.15868	2.97118	3.12286	3.22513	3.18329	3.3452	3.34886	3.29909	3.41647	3.22153	3.11496	3.32606	3.15012	3.21085	3.36336	3.27927	3.043	3.01542	3.37027	3.35034	3.16974	3.22031	3.22111	3.13362	3.11383	3.24635	3.15343	3.26536	3.43067	3.35101	NA	NA	NA	NA	NA	NA	NA	NA	NA
1623270_at	---	5	4.51604	4.64484	4.85687	4.61446	4.93207	4.55436	4.74912	4.66548	4.92092	4.58792	4.69967	4.81192	4.82045	4.76257	4.53601	4.85759	4.49265	4.55878	4.66165	4.49301	5.06717	4.84811	5.05239	4.45594	4.72621	4.68698	4.5561	4.6636	4.66191	4.366	4.61275	4.73392	4.8442	4.69952	4.90259	4.88479	NA	NA	NA	NA	NA	NA	NA	NA	NA
1623271_a_at	janA	5	10.9258	10.7053	10.7765	10.7613	10.8758	10.6973	10.9796	10.8129	11.0539	11.0022	10.9943	10.8562	10.9084	10.8625	10.7783	10.7512	11.0641	10.8849	10.9681	10.817	10.9443	11.0455	10.9135	10.9875	10.9136	10.8429	10.9962	11.0487	10.8923	10.9543	10.6947	10.8377	10.9328	10.975	10.7691	10.9715	0.197011	0.339733	0.0403555	0.551495	0.473005	0.0323009	0.862227	0.567742	-0.00805461
1623272_at	Acp53C14b	5	3.36449	3.5389	3.47709	3.40844	3.56763	3.45887	3.6492	3.5452	3.59203	3.51712	3.45233	3.51379	3.40385	3.71405	3.31602	3.59	3.56622	3.37828	3.49459	3.32253	3.52807	3.50722	3.38307	3.5249	3.48362	3.42077	3.48101	3.52186	3.31038	3.35232	3.56737	3.64959	3.5804	3.52602	3.29543	3.6403	NA	NA	NA	NA	NA	NA	NA	NA	NA
1623273_at	CG5432 /// dei	5	3.76687	4.12536	4.22586	3.51901	3.56513	3.89156	3.53857	3.52817	3.63676	3.51671	3.5734	3.63573	3.39756	3.96311	3.58793	3.86363	3.71465	3.65344	3.59562	3.78269	3.91679	3.62294	3.69673	3.625	3.77575	3.55243	3.61184	3.7465	3.74382	3.69182	3.88665	3.89176	3.71128	3.79508	4.00106	3.95671	NA	NA	NA	NA	NA	NA	NA	NA	NA
1623274_s_at	bol	5	7.40198	7.70263	7.78025	7.88938	7.0099	7.31167	6.61916	7.41462	6.7738	6.8781	6.91773	7.09438	7.28944	7.41909	7.76716	7.81841	6.96401	7.56274	7.04108	7.48213	7.26884	6.75155	6.9799	6.54944	7.19608	7.78549	6.71725	7.16945	7.63843	7.53234	7.24113	7.07418	6.9546	7.04714	6.92733	6.45108	0.921591	0.583729	0.00834856	0.571689	0.479263	-0.0882578	0.489986	0.451395	-0.0966063
1623275_at	Or35a	5	3.86368	3.49173	3.92587	3.874	3.92768	4.43541	4.06272	3.78985	4.02842	4.03626	3.9598	4.30714	3.76779	4.06016	3.89149	3.96597	3.88626	4.02366	4.2473	3.8928	3.81777	4.37202	3.78394	4.31367	3.92755	3.89672	3.87653	3.84673	3.74892	4.06891	4.19217	3.96275	4.08451	3.9131	3.84469	4.30303	NA	NA	NA	NA	NA	NA	NA	NA	NA
1623276_at	CG31663	5	8.00904	8.57426	8.40757	8.39736	8.08556	8.59913	7.68354	8.00322	7.89015	7.85521	7.69066	7.80356	8.17656	8.08518	8.30959	8.4626	8.10511	8.71941	8.14563	8.49403	8.3372	7.86475	8.10607	7.87263	8.15723	8.33524	7.75408	7.83215	8.27958	8.24664	8.10211	8.20679	7.89374	7.78374	7.81764	7.8039	0.116816	0.286204	0.139958	0.501507	0.454913	-0.0655342	0.0294979	0.151654	-0.205493
1623277_at	---	5	10.2111	10.854	10.5562	10.9726	11.0062	10.85	10.7556	10.9358	10.6547	10.5642	10.7862	10.7482	10.7345	10.6905	10.7295	10.7468	10.9433	11.0371	10.7516	10.8529	10.9446	10.5187	11.0067	10.7251	10.6578	10.7987	10.8872	10.7086	11.105	10.9689	10.8163	10.8924	11.0319	10.9662	10.5845	10.6538	0.314873	0.389263	0.0655385	0.18975	0.335969	0.0980368	0.592584	0.486447	0.0324983
1623278_at	---	5	4.30386	4.52954	4.42232	4.53283	4.49919	4.54319	4.89035	4.69826	4.73948	4.40917	4.3676	4.60035	4.37413	4.39041	4.59858	4.59315	4.53086	4.48397	4.4357	4.68335	5.09655	4.61973	4.5906	4.54221	4.41055	4.41054	4.30147	4.62862	4.53189	4.62142	4.76362	4.63509	4.62516	4.71295	4.87334	4.52433	NA	NA	NA	NA	NA	NA	NA	NA	NA
1623279_at	---	5	3.93204	3.94815	4.20159	4.27742	4.01332	4.06968	4.3452	4.1638	4.20156	4.28291	4.11928	4.25165	3.94516	4.34067	4.10557	4.25109	4.20372	4.07199	4.08463	4.19728	4.41757	4.34631	4.36667	4.23369	4.29055	4.00569	4.20258	3.89684	4.35601	4.2688	4.50155	4.23802	4.39202	4.22694	4.49132	4.54416	NA	NA	NA	NA	NA	NA	NA	NA	NA
1623280_at	---	5	3.60133	3.93469	3.98307	3.61652	3.67365	3.7311	3.83648	3.62847	3.5064	3.80763	3.61407	3.76021	3.73873	3.83951	3.65406	3.73778	3.70276	3.77918	3.99397	3.71045	3.85089	3.78991	3.86994	3.76556	3.73647	3.68708	3.69592	3.69024	3.68583	3.52215	3.42181	3.88898	3.80241	3.69664	3.93053	3.85039	NA	NA	NA	NA	NA	NA	NA	NA	NA
1623281_s_at	His2B:CG17949 /// His2B:CG33868 /// His2B:CG33870 /// His2B:CG33872 /// His2B:CG33874 /// His2B:CG33876 /// His2B:CG33878 /// His2B:CG33880 /// His2B:CG33882 /// His2B:CG33884 /// His2B:CG33886 /// His2B:CG33888 /// His2B:CG33890 /// His2B:CG33892 /// His2B:CG33894 /// His2B:CG33896 /// His2B:CG33898 /// His2B:CG33900 /// His2B:CG33902 /// His2B:CG33904 /// His2B:CG33906 /// His2B:CG33908 /// His…	5	9.2934	8.57153	8.77844	8.92617	9.02538	8.49107	8.87408	8.90737	8.74454	9.02996	9.25727	9.29828	9.3609	8.80074	9.09875	8.51766	9.39343	8.91545	8.92011	8.67411	8.80134	9.15763	8.93286	8.8132	8.92616	8.99424	9.62871	9.82647	9.4554	9.07745	9.03525	9.02527	9.28291	9.51549	9.43548	9.27878	0.863629	0.567929	0.0157242	0.00578955	0.0590604	0.357011	0.0142492	0.101237	0.341287
1623282_at	---	5	3.31709	3.29256	3.39633	3.17883	3.28521	3.47737	3.52354	3.11797	3.39385	3.3766	3.38339	3.52011	3.33574	3.33038	3.20597	3.28741	3.39265	3.31626	3.28155	3.19913	3.21193	3.48599	3.32072	3.26021	3.25385	3.2674	3.27311	3.37421	3.20558	3.29428	3.1655	3.16407	3.17125	3.41343	3.3088	3.64922	NA	NA	NA	NA	NA	NA	NA	NA	NA
1623283_at	---	5	3.32601	3.68825	3.16633	3.20482	3.26053	3.17217	3.32918	3.08169	3.1827	3.50727	3.31215	3.48013	3.28668	3.17386	3.25776	3.21069	3.32095	3.21606	3.17577	3.23941	3.47371	3.224	3.38137	3.15468	3.32968	3.28774	3.3428	3.45647	3.17911	3.18935	3.23112	3.43329	3.38253	3.43381	3.1665	3.20489	NA	NA	NA	NA	NA	NA	NA	NA	NA
1623285_at	CG1637	5	10.6667	10.7672	10.6847	10.6671	10.5727	10.7915	10.6224	10.5167	10.5438	10.4069	10.3981	10.7816	10.6198	10.6882	10.627	10.5427	10.4742	10.5784	10.4147	10.4774	10.624	10.4568	10.3646	10.7502	10.6788	10.6743	10.4909	10.4921	10.5908	10.6813	10.6508	10.4962	10.391	10.5388	10.3946	10.4162	0.0230472	0.131803	-0.0667702	0.0697318	0.23207	-0.0769832	0.827751	0.558364	-0.010213
1623286_at	CG32298 /// CG32299	5	3.30121	3.60266	3.16599	3.28408	3.23138	3.25838	3.27857	3.26663	3.39462	3.04288	3.21791	3.24644	3.31273	3.20156	3.00917	3.14766	3.29658	2.99699	3.26684	3.29909	3.23395	3.34573	3.52816	3.26843	3.094	3.30774	3.41321	3.37529	3.33784	3.22809	3.2913	3.42343	3.2344	3.23112	3.37541	3.32711	NA	NA	NA	NA	NA	NA	NA	NA	NA
1623287_at	CG13921	5	7.88311	7.36018	7.12257	7.29799	7.509	6.91426	7.20814	7.52246	7.43404	7.89037	7.88645	7.4146	8.00727	7.42317	7.6383	7.05107	7.99414	7.17224	7.50082	7.0358	7.37295	7.7461	7.40875	7.56084	7.32266	7.1611	7.97688	8.14938	7.50678	7.55337	7.5386	7.89171	7.58956	7.6751	7.67676	7.55513	0.693388	0.517492	0.0390213	0.192867	0.338003	0.179488	0.360615	0.406266	0.140467
1623288_at	Pros26	5	11.767	11.3539	11.5059	11.5531	11.6672	11.5994	11.7365	11.6133	11.8895	11.6907	11.7726	11.7965	11.5825	11.4987	11.4968	11.4508	11.7898	11.5244	11.6119	11.4743	11.6924	11.6727	11.628	11.6702	11.5588	11.6056	11.7549	11.8464	11.5981	11.6375	11.6338	11.6162	11.6424	11.685	11.7478	11.948	0.0491505	0.196694	-0.0710904	0.603764	0.489837	0.0274022	0.0568789	0.211478	0.0984925
1623290_at	Osi4	5	4.02789	3.69419	4.12682	3.62815	3.58716	3.66506	3.82128	3.79773	3.95097	3.79139	3.82089	3.88205	3.7239	3.87247	3.87046	3.71462	3.82122	3.77266	4.05907	3.8544	3.98722	3.86743	3.75454	3.84944	3.78131	3.9898	3.73189	3.74601	3.87896	3.94035	3.61274	3.93287	3.81979	3.62954	3.86072	3.87224	NA	NA	NA	NA	NA	NA	NA	NA	NA
1623291_at	CG31673	5	10.6171	10.4734	10.5731	10.673	10.5447	10.5569	10.7516	10.7051	10.9084	10.5723	10.6487	10.6861	10.5713	10.4948	10.5605	10.5043	10.6252	10.4434	10.5556	10.4438	10.7	10.7562	10.53	10.6516	10.5386	10.4228	10.5802	10.616	10.3713	10.6682	10.4561	10.5668	10.4981	10.6124	10.748	10.7918	0.0784895	0.244677	-0.072829	0.165463	0.323348	-0.0700037	0.952828	0.590907	0.00282537
1623292_at	CG33128	5	5.48658	5.41832	5.56192	5.337	5.27761	5.09271	5.15603	5.181	5.10274	5.40217	5.35482	5.36074	5.09318	5.47997	5.25385	5.4876	5.25461	5.33535	5.36613	5.0832	5.53582	5.4014	5.41095	5.07007	5.2212	5.27403	5.25375	5.36119	5.32	5.38411	5.27533	5.24303	5.55298	5.3694	5.19715	5.49908	NA	NA	NA	NA	NA	NA	NA	NA	NA
1623293_at	CG4042	5	9.56617	9.48296	9.50584	9.42012	9.52352	9.39365	9.54886	9.49387	9.63121	9.64438	9.66627	9.47989	9.38388	9.5897	9.39287	9.36942	9.59319	9.49584	9.66499	9.46807	9.42584	9.64955	9.56441	9.5095	9.3841	9.44302	9.55128	9.62555	9.56495	9.62017	9.4167	9.45753	9.63771	9.62808	9.49885	9.55042	NA	NA	NA	NA	NA	NA	NA	NA	NA
1623294_at	CG17669	5	3.68013	3.54804	3.65375	3.56864	3.66134	3.59154	3.63234	3.76093	3.67815	3.42425	3.58079	3.59734	3.45094	3.52086	3.67059	3.59588	3.38948	3.4821	3.44969	3.63318	3.68509	3.62439	3.66415	3.54426	3.79205	3.7442	3.63978	3.6673	3.61548	3.68677	3.53017	3.64473	3.73721	3.70532	3.81912	3.74652	NA	NA	NA	NA	NA	NA	NA	NA	NA
1623295_at	CG8564	5	4.58279	4.68076	4.3025	4.26045	4.60954	4.66679	4.62761	4.67478	4.84709	4.51408	4.48465	4.64579	4.67565	4.60007	4.50847	4.49386	4.51273	4.41942	4.64228	4.63872	4.50274	4.61762	4.5542	4.3234	4.33491	4.33123	4.53183	4.66418	4.47695	4.47898	4.77941	4.72208	4.51925	4.61947	4.5801	4.59519	NA	NA	NA	NA	NA	NA	NA	NA	NA
1623296_at	CG32625	5	9.86416	9.28612	9.28796	9.34257	9.56073	9.21919	9.7523	9.59665	10.0553	9.65493	9.60972	9.64793	9.36553	9.55116	8.97997	9.102	9.70075	9.08203	9.67334	9.16048	9.5925	9.72939	9.35337	9.55101	9.34108	9.25831	9.67035	10.1632	9.4965	9.74712	9.51396	9.61716	9.54691	9.59097	9.76674	9.95024	0.0348002	0.164614	-0.169671	0.582595	0.483026	0.0654087	0.0889377	0.257244	0.23508
1623297_at	CG18371	5	3.61262	3.51758	3.79152	3.49551	3.64237	3.78117	3.53217	3.57047	3.83908	3.79674	3.79204	3.59979	3.62328	3.67862	3.39585	4.03947	3.55206	3.59559	3.66099	3.65561	3.91849	3.57965	3.69679	3.76073	3.6527	3.60222	3.59433	3.75463	3.81245	3.45757	3.39068	3.68907	3.65713	3.65005	3.73368	3.6477	NA	NA	NA	NA	NA	NA	NA	NA	NA
1623299_at	Mmp2	5	5.88471	6.13692	6.33363	6.34016	5.67622	6.33986	5.63301	6.12685	5.89889	5.42311	5.72665	6.06108	5.81668	6.24003	5.97254	6.42824	5.90599	6.22687	5.64333	5.79345	5.92437	5.59592	5.48344	5.63311	6.16758	5.89772	5.93944	6.21344	5.97855	5.9968	5.88257	5.89101	5.55524	5.46511	6.12235	5.90291	0.254318	0.365915	-0.0764264	0.579887	0.482347	-0.0473634	0.749115	0.535219	0.029063
1623300_at	CG18586 /// CG5568	5	7.32694	6.07915	6.32761	6.66506	6.76236	6.24679	6.8583	6.80611	7.22956	7.42555	7.30425	6.81371	7.13213	6.5474	6.53118	5.95914	7.27103	6.25072	6.69927	6.09205	6.79201	6.99005	6.78372	7.07261	6.59771	6.2754	7.46676	7.88985	6.79573	6.95305	6.8419	6.91003	7.12301	7.26025	7.10979	6.42124	0.274747	0.373366	-0.143674	0.398122	0.419879	0.149943	0.197544	0.340031	0.293617
1623301_at	---	5	4.64238	4.8582	4.73577	4.55162	4.806	4.6456	4.55032	4.70735	4.95004	4.72162	4.59187	4.77986	4.50344	4.88914	4.35322	4.54173	4.58269	4.65311	4.68329	4.85561	4.65776	4.58972	4.73303	4.36386	4.59094	4.66477	4.72343	4.89465	4.7124	4.40634	4.62881	4.72452	4.66837	4.4433	5.00182	4.85655	NA	NA	NA	NA	NA	NA	NA	NA	NA
1623302_at	CG8067	5	8.04142	8.13823	8.17866	8.06744	8.10764	7.99025	8.03715	8.03476	7.92161	8.16012	8.03109	8.06794	8.03208	8.26171	8.1817	8.04528	8.16731	8.21419	8.30261	8.3653	8.04815	8.23844	8.1948	8.18998	8.10887	8.3476	7.98768	8.15711	8.05055	8.10622	8.05347	8.15166	8.0294	7.98037	7.9906	8.16186	NA	NA	NA	NA	NA	NA	NA	NA	NA
1623303_at	---	5	4.0909	4.18488	4.23083	4.21301	4.15478	4.2974	4.26946	4.11655	4.24763	4.22863	4.0885	4.19988	3.96012	4.32477	4.10863	4.26401	4.15645	4.10141	4.24803	4.04036	4.34194	4.14838	4.21641	4.12569	4.13553	4.08771	4.06571	4.26411	4.21749	4.07731	4.47303	4.18844	4.1008	4.32632	3.98517	4.11046	NA	NA	NA	NA	NA	NA	NA	NA	NA
1623304_at	CG9107	5	6.19725	6.05617	6.19067	5.75146	6.23303	5.98896	6.35702	6.14602	6.23266	6.2191	6.29793	6.05579	6.07996	6.27079	6.03431	5.79961	6.0759	6.12757	5.7873	5.71713	6.32059	6.06784	6.10514	6.05883	6.13572	5.87625	6.29652	6.51672	5.93098	6.23822	6.11695	6.04907	5.82174	6.12147	6.107	5.98663	NA	NA	NA	NA	NA	NA	NA	NA	NA
1623305_at	CG5091	5	3.49182	3.53114	3.31886	3.45098	3.50007	3.4685	3.57936	3.74997	3.36826	3.37003	3.57989	3.42766	3.56384	3.19935	3.60057	3.3839	3.39121	3.45119	3.50428	3.25018	3.38993	3.36551	3.58757	3.52242	3.39563	3.78832	3.57827	3.67567	3.62224	3.6302	3.65683	3.67365	3.38291	3.66427	3.18395	3.60833	NA	NA	NA	NA	NA	NA	NA	NA	NA
1623306_at	l(1)G0004	5	9.55818	9.5143	9.46595	9.23751	9.50284	9.4293	9.6857	9.45619	9.56883	9.72856	9.62479	9.49101	9.38456	9.56089	9.39834	9.31476	9.53354	9.44089	9.63441	9.30722	9.55909	9.70746	9.53354	9.60091	9.53236	9.52572	9.65092	9.68502	9.54587	9.76703	9.55861	9.55737	9.54044	9.70078	9.52471	9.80634	0.359239	0.405941	-0.0239635	0.107214	0.277697	0.0943327	0.0247552	0.13793	0.118296
1623307_at	---	5	4.04373	3.84059	3.68687	3.86664	4.06408	3.92553	4.2454	4.00952	3.95552	3.87795	3.87064	4.17687	3.63614	3.95213	3.92295	4.12023	4.00789	4.00263	4.07815	3.79096	4.11318	3.89158	4.2649	4.02952	3.91327	4.09411	4.04459	3.85319	4.10509	3.83922	3.68176	3.84655	3.874	4.13329	3.93959	3.98662	NA	NA	NA	NA	NA	NA	NA	NA	NA
1623308_at	CG33784	5	3.61139	3.5363	3.27381	3.54807	3.53217	3.65922	3.58734	3.74005	3.59644	3.57185	3.56013	3.37861	3.47075	3.4954	3.91497	3.78717	3.58506	3.59159	3.68823	3.93889	3.61493	3.5857	3.52386	3.27258	3.71176	3.52118	3.8543	3.43326	3.3708	3.45503	3.4549	3.42436	3.555	3.47562	3.62378	3.62986	NA	NA	NA	NA	NA	NA	NA	NA	NA
1623309_at	NepYr	5	4.01938	3.93271	4.04486	3.55035	3.90999	3.78394	3.97077	3.86884	4.08423	3.77922	3.98282	3.64485	3.65519	3.95898	4.28545	3.7808	3.85899	3.6511	3.74468	3.64924	3.70876	3.67699	3.76217	3.57731	3.75588	3.63599	3.87246	4.10127	3.82191	3.77968	3.86903	3.69735	3.83594	3.76673	3.99151	3.76848	NA	NA	NA	NA	NA	NA	NA	NA	NA
1623310_at	---	5	4.56424	4.36424	4.37902	4.12548	4.14268	4.1857	4.16335	4.23174	4.09731	4.1783	4.13121	4.33589	4.07871	4.44885	4.12708	4.03503	4.12721	4.15265	4.0792	4.03331	4.22602	4.17137	4.13979	4.16159	4.16481	4.10865	4.16014	3.94609	4.02721	4.23137	4.3842	4.28292	4.13855	4.26799	4.33803	4.53178	NA	NA	NA	NA	NA	NA	NA	NA	NA
1623311_at	CG34127	5	5.01827	5.11576	5.5288	5.30107	5.14218	5.22461	5.16318	5.1802	5.38139	5.08351	4.98354	5.09911	5.06607	5.27797	5.02441	5.1822	4.92519	5.33882	4.90583	5.15655	5.26375	5.2435	5.15289	4.9212	4.94315	5.14015	5.0969	5.31835	5.07232	4.91309	4.96609	5.18417	5.09097	5.31332	5.0184	5.12582	NA	NA	NA	NA	NA	NA	NA	NA	NA
1623312_s_at	CG11836	5	9.26606	8.35251	8.55604	8.62267	8.707	8.5078	8.83942	8.79484	9.0163	9.05438	9.08744	8.99648	8.96054	8.93761	8.60281	8.31622	9.26312	8.45855	8.7487	8.29541	8.69649	9.01882	8.80096	8.93315	8.71056	8.29788	9.18401	9.53046	8.80373	8.91073	8.84871	8.86208	8.89442	9.12697	9.13916	9.08674	0.522583	0.462196	-0.0640481	0.242169	0.36168	0.132878	0.200028	0.341155	0.196926
1623313_at	CG6114	5	4.15134	4.22604	4.22619	4.32057	4.00474	4.36911	4.52679	4.03261	4.1782	4.03458	4.19958	4.28182	4.22053	4.48928	4.26311	3.97709	4.09986	4.22822	4.03907	4.47887	4.39569	4.16753	4.26261	4.11059	4.23671	4.42519	4.10859	3.97192	4.1171	4.20163	4.09169	4.40678	4.30181	4.15969	4.42621	4.47616	NA	NA	NA	NA	NA	NA	NA	NA	NA
1623314_at	toy	5	3.52351	3.91796	3.40039	3.50481	3.22238	3.55399	3.74548	3.23349	3.51974	3.83351	3.25763	3.3365	3.38841	3.67529	3.48309	3.61292	3.70702	3.64244	3.56595	3.62649	3.41348	3.80554	3.56903	3.69685	3.45905	3.36819	3.5157	3.46086	3.37831	3.29711	3.48361	3.42526	3.53106	3.53444	3.64947	4.06711	NA	NA	NA	NA	NA	NA	NA	NA	NA
1623315_at	CG13253	5	5.16678	5.18212	5.24251	5.13827	4.95901	5.1386	4.45245	4.91059	4.78315	4.69269	4.92282	4.91649	4.81871	5.01198	5.14225	5.16578	4.60684	5.27401	4.52897	5.04495	4.74954	4.95726	4.76667	4.51841	4.90976	5.01637	4.71181	4.61972	4.98712	4.83561	4.92292	4.8143	4.56794	4.75975	4.82868	4.75252	NA	NA	NA	NA	NA	NA	NA	NA	NA
1623316_at	CG14785	5	6.5226	6.37761	6.46352	6.17685	6.35867	6.49003	6.50325	6.35046	6.36353	6.33419	6.49747	6.39005	6.4642	6.45311	6.05205	6.37599	6.2208	6.31544	6.43006	6.44619	6.36693	6.53049	6.2616	6.43643	6.20813	6.13768	6.40781	6.04069	6.29337	6.27828	6.20544	6.42377	6.52926	6.28222	6.14863	6.38459	NA	NA	NA	NA	NA	NA	NA	NA	NA
1623317_at	CG15477	5	3.94145	4.48322	4.22052	4.25694	3.88187	3.92741	4.37716	4.19034	4.09252	3.81668	4.41171	4.29331	4.16381	4.82994	4.0193	3.89021	4.10227	4.35728	4.15283	3.88799	4.35376	4.2394	4.20442	4.09374	4.20324	4.01116	4.24701	4.29332	4.2372	4.14383	4.19813	4.30814	4.19332	4.17706	4.33454	4.11275	NA	NA	NA	NA	NA	NA	NA	NA	NA
1623318_s_at	Met75Ca /// Met75Cb	5	3.52673	3.68366	3.64004	3.53612	4.01881	3.85677	3.64122	3.53862	4.11329	3.83726	3.58768	3.71854	3.76867	3.9342	3.57232	3.76359	4.27193	3.69953	3.64576	3.74248	3.93595	3.82905	3.8186	3.81029	3.66755	3.65682	3.74602	4.04915	5.2299	5.26656	3.67622	3.49071	3.84559	3.79422	3.90938	3.91504	0.083021	0.250618	0.0911353	0.0722154	0.235608	0.295702	0.213149	0.347687	0.204567
1623319_at	Wnt10	5	4.45961	4.43343	4.49611	4.43132	4.5792	4.34233	4.33123	4.3734	4.41845	4.44354	4.25523	4.69486	4.53755	4.56923	4.20485	4.68755	4.36182	4.36153	4.3171	4.48028	4.48572	4.47771	4.44109	4.3112	4.24339	4.36724	4.41304	4.38606	4.44003	4.26516	4.41008	4.29977	4.58506	4.52102	4.6909	4.64558	NA	NA	NA	NA	NA	NA	NA	NA	NA
1623320_at	CG3711	5	8.84739	8.75366	8.68672	8.5678	8.55775	8.51432	8.51039	8.61968	8.56733	8.63137	8.54785	8.52601	8.57575	8.73807	8.70116	8.71444	8.46983	8.69469	8.36349	8.52385	8.63026	8.52881	8.47239	8.55944	8.47439	8.50753	8.59847	8.73327	8.62533	8.67422	8.57771	8.549	8.51508	8.54218	8.61632	8.29449	0.432851	0.432231	-0.0298429	0.30843	0.387022	-0.0518566	0.618751	0.494957	-0.0220137
1623321_at	---	5	2.94643	3.26192	3.04197	2.95538	2.87275	2.92716	2.94925	2.99857	3.07537	2.82426	2.98434	3.11054	3.03734	2.93819	2.83011	3.04792	2.93789	2.98275	2.85699	3.07711	3.04462	3.00828	3.02077	3.05045	2.88718	2.91966	3.02572	2.85806	2.92306	3.07221	3.32	3.1426	2.92358	2.98789	3.14096	3.02337	NA	NA	NA	NA	NA	NA	NA	NA	NA
1623322_at	CG9067	5	8.78538	8.79057	8.63312	8.76507	8.60763	8.82554	8.75682	8.6166	8.73035	8.63318	8.53337	8.53433	8.61687	8.73115	8.61982	8.85958	8.71175	8.83691	8.93173	8.77727	8.69	8.78603	8.64907	8.79354	8.77566	8.77847	8.63576	8.66748	8.65831	8.8221	8.69913	8.65272	8.74837	8.61575	8.51208	9.07489	0.0861234	0.253712	0.0659796	0.465627	0.444025	0.0357289	0.50689	0.456591	-0.0302506
1623323_at	Gr10b	5	4.26718	4.0885	4.70794	4.2439	4.33305	4.59928	4.25374	4.44918	4.5507	4.57777	4.27602	4.32796	4.40722	4.358	4.25639	4.53648	4.11855	4.39556	4.37615	4.3303	4.5618	4.67383	4.61752	4.37409	4.64839	4.41431	4.46681	4.23802	4.42601	4.37076	4.61691	4.59636	4.64915	4.40088	4.54404	4.35813	NA	NA	NA	NA	NA	NA	NA	NA	NA
1623324_at	lin	5	8.36509	7.83341	7.50033	7.87379	7.94212	7.60724	7.97812	7.97906	8.06101	8.28785	8.39611	8.33139	8.40366	8.08911	8.01456	7.11783	8.50648	7.55913	7.91941	7.66534	7.83855	8.2098	7.94117	8.14032	7.94246	7.84128	8.48323	8.64489	7.94814	8.02041	7.84967	8.04672	8.24296	8.44731	8.02196	7.95218	0.57894	0.48219	-0.0625137	0.417568	0.427505	0.107139	0.31429	0.389204	0.169653
1623325_at	CG6847 /// DmirCG6847	5	6.45426	6.71134	6.43527	6.59887	6.19294	6.47422	6.19379	6.41623	6.10397	6.38819	6.25046	5.99806	6.47019	6.54029	6.57828	6.72403	6.29649	6.68014	6.75728	6.7963	6.15018	6.48178	6.28166	6.71555	6.46995	6.73727	6.13549	6.08686	6.41017	6.3617	6.46275	6.17642	6.1563	6.1134	6.2864	6.30873	NA	NA	NA	NA	NA	NA	NA	NA	NA
1623326_a_at	mge	5	11.7252	11.3802	11.5232	11.2999	11.5011	11.4253	11.7703	11.6526	11.7777	11.775	11.7893	11.6684	11.7133	11.4682	11.5548	11.3331	11.685	11.509	11.7228	11.4314	11.6187	11.7845	11.7068	11.5813	11.5628	11.5007	11.7337	11.8294	11.5832	11.7439	11.6611	11.6877	11.5515	11.7573	11.5686	11.8838	0.654016	0.505694	-0.0149543	0.352096	0.403289	0.0646012	0.212531	0.347431	0.0795555
1623327_at	---	5	11.6295	12.0256	11.8027	11.9407	11.6775	12.0582	11.6999	11.4378	11.2916	11.6551	11.1259	11.6878	11.8144	11.9204	11.8056	12.2774	11.5703	11.8915	12.0791	12.1784	11.6491	11.6142	11.6906	12.0619	11.9413	11.756	11.4886	11.3552	11.833	11.6228	11.9473	11.6618	11.6424	11.4818	11.6328	12.054	0.0307309	0.154624	0.210035	0.76692	0.540551	0.032046	0.0725407	0.235819	-0.177989
1623328_at	CG7252	5	4.25308	4.28267	4.18011	4.25291	4.82414	4.66831	4.36076	4.71032	4.41851	4.51782	4.30492	4.85771	4.50585	4.48569	4.50376	4.25444	4.2065	4.87775	4.5954	4.46881	4.75981	4.52092	4.30753	4.53753	4.41255	4.29265	4.71983	4.21313	4.56915	4.69431	4.60385	4.70172	4.67226	4.64901	4.84444	4.56384	NA	NA	NA	NA	NA	NA	NA	NA	NA
1623329_at	CG14500	5	10.8509	10.9319	10.6067	10.7691	11.1224	11.1526	11.3682	10.9979	11.207	11.3522	10.735	10.8438	10.6483	9.91411	11.4142	10.8317	11.1944	11.2305	11.5586	11.2399	11.0233	11.3779	11.6081	11.7279	11.0009	11.3231	11.0864	10.3813	10.7213	10.7921	10.8023	10.8557	11.0707	10.8996	10.7001	11.0426	0.343568	0.399861	0.1526	0.315339	0.38951	-0.105152	0.180254	0.331148	-0.257752
1623330_at	CG5568	5	8.91606	7.11583	7.61215	6.75926	8.15994	7.13377	8.15129	7.77544	8.38218	8.62078	8.83469	8.19286	8.00647	8.02098	7.25086	6.69724	8.80812	7.1919	7.78231	6.87219	7.73186	8.40542	7.70106	8.15505	8.04326	7.06099	8.35653	8.93921	7.72531	7.69398	7.95574	7.78701	7.5914	8.20924	8.17266	7.49962	0.181924	0.332015	-0.252565	0.840644	0.561917	-0.0516068	0.473785	0.447246	0.200958
1623331_at	CG32199	5	3.65142	3.71036	3.56945	3.53839	3.49146	3.56749	3.73374	3.73498	3.72836	3.69161	3.60001	3.68838	3.59412	3.80885	3.38641	3.70457	3.94026	3.79089	3.62362	3.8161	3.6723	3.82284	4.05316	3.71511	3.59908	3.61351	3.56449	3.70547	3.5008	3.4615	3.79064	3.8059	3.69016	3.82253	3.70895	3.74882	NA	NA	NA	NA	NA	NA	NA	NA	NA
1623332_at	Obp99d	5	5.71107	6.52107	6.07452	8.41464	5.91555	6.5213	7.25602	6.10799	5.49339	5.87326	8.30945	7.81223	6.05384	6.43084	6.21542	6.49502	5.65794	5.85393	5.65215	6.2814	5.65335	5.76665	5.66279	6.0158	6.72613	7.4057	6.15552	5.59708	6.3018	5.69458	5.8474	5.85283	5.25658	5.63423	5.51063	5.84997	0.0395891	0.176244	-0.689278	0.0988577	0.269639	-0.681504	0.960441	0.593241	0.00777449
1623333_a_at	l(1)G0007	5	7.95489	7.73698	7.62523	7.79214	7.64856	7.75668	7.90666	7.7749	7.89495	7.78298	7.83565	7.63394	7.65043	7.80352	7.6072	7.67564	7.79693	7.67301	7.82492	7.82038	7.7568	7.82101	7.76131	7.82896	7.74727	7.65786	7.80406	8.00603	7.61855	7.86189	7.79861	7.77069	7.7924	7.78827	7.83817	7.8585	NA	NA	NA	NA	NA	NA	NA	NA	NA
1623334_at	CG12913	5	4.76779	4.93698	4.80247	4.93759	4.85745	4.73564	4.9623	4.82344	4.80355	4.66372	4.64752	4.70135	4.60372	4.6844	4.7508	4.85594	4.69903	4.76377	4.49705	4.81532	4.93603	4.78166	4.67898	4.55417	4.89564	4.6162	4.8139	4.5588	4.76799	4.84997	4.86547	4.63177	4.67919	4.62576	4.8734	5.06193	NA	NA	NA	NA	NA	NA	NA	NA	NA
1623335_a_at	CG5044	5	10.9469	10.9802	10.9188	10.6887	10.5816	10.5235	10.6598	10.7146	10.7479	10.6554	10.5625	10.6377	10.7358	11.0478	10.6337	10.8491	10.6732	10.5212	10.5925	10.6589	10.6183	10.6874	10.5915	10.5693	10.8657	10.659	10.5994	10.7614	10.5952	10.7075	10.7338	10.6794	10.5102	10.6449	10.7717	10.4148	0.34234	0.399431	-0.036587	0.311143	0.388024	-0.0562087	0.690184	0.516616	-0.0196217
1623336_at	---	5	5.0753	5.07798	5.40491	4.77665	4.93306	4.95874	4.81746	4.95461	5.12459	4.83109	4.63966	5.08211	5.21326	5.39476	4.77143	4.95757	4.70797	4.81805	4.87652	5.0101	5.22105	4.74114	4.81726	4.59316	4.75525	4.6407	4.6363	4.72635	4.71658	4.78164	5.02449	5.12372	4.71894	4.87207	4.91523	5.02966	NA	NA	NA	NA	NA	NA	NA	NA	NA
1623337_at	---	5	4.18284	4.48959	4.33881	4.45979	4.56831	4.22665	4.81468	4.3352	4.44354	4.35306	4.41216	4.63219	4.62048	4.59645	4.33088	4.5403	4.41181	4.53847	4.3931	4.52123	4.49754	4.53725	4.71627	4.53668	4.43641	4.57122	4.43139	4.33565	4.4353	4.22742	4.70195	4.44458	4.30045	4.42114	4.5974	4.69442	NA	NA	NA	NA	NA	NA	NA	NA	NA
1623338_at	---	5	3.71181	3.86143	3.74514	3.94598	3.74799	3.81663	3.58442	3.92922	3.85964	3.7304	3.742	3.78835	3.79422	3.52791	3.91322	3.87021	3.60525	3.8493	3.82305	3.77712	3.75114	3.85481	3.683	3.87644	3.63707	4.06835	3.63401	3.82008	3.90458	3.98169	3.71117	3.98793	3.88998	3.88687	3.83139	3.76118	NA	NA	NA	NA	NA	NA	NA	NA	NA
1623339_at	CG7498	5	9.22789	9.10055	9.0895	9.07198	9.13795	9.22745	9.40976	9.12127	9.4023	9.29621	9.28852	9.21271	9.12056	9.09572	9.06007	9.14427	9.2956	9.08632	9.22209	9.04667	9.09676	9.23806	9.15803	9.1692	9.10983	9.11561	9.3159	9.36587	9.19761	9.39232	9.16619	9.13915	9.20236	9.3344	9.20186	9.36124	0.0647098	0.224601	-0.0710611	0.594357	0.48705	0.0263554	0.0216799	0.127531	0.0974165
1623340_at	CG15333	5	3.67166	3.76439	3.67008	3.87365	3.79454	3.75905	3.80596	3.71341	3.90968	3.96539	3.85932	3.87329	3.83348	3.67976	3.56617	3.63844	3.74553	3.77012	3.76174	3.97057	3.90629	3.72535	3.70019	3.76248	3.6593	3.91353	3.78306	3.71044	3.7311	3.47067	3.79962	3.59275	3.83959	3.77794	3.3979	3.79326	NA	NA	NA	NA	NA	NA	NA	NA	NA
1623341_at	Osi17	5	4.86318	4.93313	4.96864	4.54345	4.85754	4.75747	4.78862	4.8789	4.7231	4.5112	4.61005	4.85968	4.80344	4.99386	4.76511	4.70977	4.91122	4.9491	4.84367	4.70181	4.85407	4.87517	4.9573	4.58228	5.00976	4.74592	4.85202	4.97982	4.71338	4.8188	4.63417	4.80184	4.6717	4.68374	4.47914	5.08556	NA	NA	NA	NA	NA	NA	NA	NA	NA
1623342_at	CG8369	5	12.6583	13.1389	13.1659	13.2173	12.9763	13.2167	12.7461	12.8166	12.5771	12.5851	12.5703	12.8063	12.7025	12.8532	13.1	13.1879	12.5367	13.2284	12.8935	13.1597	12.8968	12.5967	12.5867	12.8441	12.9309	13.1952	12.4614	12.2331	13.2585	12.9053	12.8428	12.7092	12.6185	12.447	12.4316	12.6657	0.885325	0.573909	0.00930527	0.197578	0.340053	-0.147975	0.246414	0.363178	-0.15728
1623343_at	CG4049	5	6.87553	5.98703	6.10459	5.72594	6.18496	5.7064	6.00145	6.18241	6.47008	6.48422	6.51865	6.247	6.41256	6.50647	6.05484	5.98867	6.65084	5.68706	5.78636	5.64068	6.06014	6.14917	6.03374	6.05002	5.98751	6.00213	6.4184	6.79142	6.0729	6.33054	6.10323	6.27886	6.28293	6.41602	6.51725	5.81284	0.273685	0.372901	-0.122309	0.762882	0.539627	0.0438178	0.256871	0.366595	0.166126
1623344_at	CG12856	5	4.18259	4.39209	4.56082	4.3238	4.40041	4.528	4.20592	4.21577	4.28532	4.33154	4.28621	4.39738	4.12171	4.05841	4.19908	4.47356	4.33897	4.29585	4.49619	4.50161	4.43262	4.55026	4.30499	4.34124	4.34084	4.21277	4.45794	4.43645	4.35816	3.9565	4.20649	4.45466	4.41977	4.54489	4.44097	4.27927	NA	NA	NA	NA	NA	NA	NA	NA	NA
1623346_at	CG2861	5	3.39213	3.58626	3.58372	3.51488	3.33121	3.24147	3.38638	3.40062	3.45267	3.58498	3.46186	3.69291	3.28274	3.54924	3.32771	3.36591	3.19748	3.33778	3.39097	3.44721	3.53223	3.24765	3.42848	3.53531	3.36114	3.56144	3.1603	3.15068	3.33942	3.23486	3.55076	3.47085	3.8237	3.43675	3.16129	3.31711	NA	NA	NA	NA	NA	NA	NA	NA	NA
1623347_at	CG11674	5	11.6312	10.8513	10.6086	10.5261	11.216	10.3538	11.5071	11.1848	11.7254	11.4828	11.6383	11.3265	11.2767	11.0888	10.5844	9.99816	11.6278	10.4793	11.0928	10.084	11.2028	11.4133	11.2646	11.0029	11.1877	10.5676	11.6288	12.1044	11.0262	11.2635	10.9724	11.2229	11.3421	11.6378	11.3297	11.3506	0.0621195	0.219072	-0.244704	0.51292	0.458737	0.13183	0.120043	0.289859	0.376534
1623348_at	---	5	4.00092	4.25626	4.13473	4.03413	3.91519	3.92886	4.13756	4.27106	4.10334	4.13203	4.05211	4.09734	4.2938	4.0116	4.1379	4.18923	4.0456	4.06257	3.97998	4.02648	3.99719	4.32266	4.20165	3.85876	4.2454	4.07249	4.06919	4.03443	3.9473	3.98395	4.08093	4.29003	3.97129	4.20421	4.07022	4.12171	NA	NA	NA	NA	NA	NA	NA	NA	NA
1623349_x_at	---	5	9.27601	10.0177	9.80306	9.91294	9.49378	9.79789	9.16336	9.4895	9.3936	9.29988	9.25269	9.35495	9.58403	9.60828	9.8472	9.87838	9.1575	9.76527	9.40162	9.7427	9.30925	9.24064	9.37156	9.0659	9.74616	10.0589	9.1818	8.86722	9.67809	9.3548	9.67916	9.5206	9.12254	9.32846	9.32202	9.26412	0.733577	0.530249	-0.0235837	0.478481	0.448748	-0.0942923	0.601655	0.489053	-0.0707086
1623350_at	Lrr47	5	7.91018	7.16802	7.26796	7.10628	7.31333	7.03145	7.38381	7.38419	7.71071	7.6635	7.74844	7.56199	7.58191	7.50543	7.29699	6.82243	7.87714	7.11004	7.23479	6.92644	7.28978	7.54164	7.42515	7.28697	7.22492	7.06228	7.92854	8.32119	7.45046	7.34028	7.43452	7.51291	7.51065	7.84547	7.70329	7.00027	0.238846	0.360239	-0.112596	0.548728	0.472108	0.0904124	0.231657	0.357175	0.203008
1623351_at	CG3857	5	6.68573	6.487	6.17105	6.09393	6.43012	6.15452	6.47621	6.44835	6.81128	6.51031	6.52105	6.38593	6.17824	6.35562	6.13409	6.43959	6.5996	6.32957	6.26176	6.153	6.44841	6.51791	6.43587	6.47429	6.04272	6.14865	6.63822	6.74485	6.40283	6.4633	6.48377	6.58743	6.44858	6.561	6.77508	6.39325	NA	NA	NA	NA	NA	NA	NA	NA	NA
1623352_at	CG7016	5	8.82731	9.3653	9.41913	9.78974	9.19869	9.60483	9.09697	9.13452	8.5857	8.63279	8.63268	9.48834	9.19925	9.29856	9.60239	9.74875	8.85538	9.38391	9.25586	9.54541	8.98017	8.78714	9.20894	9.65073	9.19559	9.34092	8.71775	8.50532	9.36408	8.73861	9.04579	9.17312	8.64763	8.3287	8.76867	9.0742	0.0935877	0.262365	0.145043	0.119316	0.289123	-0.239635	0.0134457	0.0981143	-0.384678
1623353_at	abs	5	7.69339	7.21582	7.30172	7.40401	7.42793	7.37462	7.5235	7.4279	7.52022	7.71744	7.54059	7.4516	7.43367	7.43257	7.4276	7.25879	7.72129	7.44168	7.40846	7.41544	7.35653	7.55318	7.41027	7.64102	7.52036	7.69396	7.53173	7.64353	7.42117	7.65853	7.55098	7.53485	7.60717	7.64064	7.65894	7.29431	NA	NA	NA	NA	NA	NA	NA	NA	NA
1623354_at	---	5	3.88395	4.028	3.90876	3.86313	4.01964	3.9729	4.09193	3.81328	4.2852	3.84185	3.84669	3.94244	3.79146	3.8572	3.86107	4.04012	3.89017	3.79294	3.75252	3.98421	4.17412	4.10289	3.84601	3.81147	3.73834	3.60844	3.92302	3.9012	3.89597	4.06872	4.0784	4.11674	3.96507	4.06068	4.24511	4.20079	NA	NA	NA	NA	NA	NA	NA	NA	NA
1623355_at	v	5	10.0155	10.4236	10.343	10.2442	9.91675	10.218	9.72008	9.96559	9.9147	9.80301	9.52979	9.99534	10.0325	10.1511	10.1402	10.62	9.56051	10.2356	10.1343	10.5257	9.91492	9.91789	9.97033	10.0416	10.2331	9.89351	9.73227	9.38392	9.86246	9.97593	9.78223	9.92507	9.97883	9.66112	9.84727	10.0768	0.284847	0.378217	0.0962601	0.1858	0.334645	-0.14476	0.0655355	0.226048	-0.24102
1623356_at	CG11999	5	9.67615	9.67648	9.73724	9.7714	9.65492	9.82601	9.77032	9.73109	9.78926	9.62678	9.6728	9.77824	9.59019	9.74807	9.81303	9.87694	9.84626	9.75371	9.80894	9.93968	9.71888	9.76531	9.88393	9.76648	9.67522	9.81467	9.7319	9.84875	9.70193	9.75946	9.73402	9.82753	9.7922	9.76892	9.84829	10.0167	NA	NA	NA	NA	NA	NA	NA	NA	NA
1623357_at	BHD	5	7.39783	7.30126	7.34697	7.42922	7.4092	7.51753	7.55587	7.36546	7.48268	7.52981	7.47022	7.47333	7.49885	7.49954	7.44549	7.49423	7.69494	7.40594	7.58246	7.30402	7.52224	7.504	7.56787	7.63529	7.34056	7.38584	7.54839	7.85031	7.45124	7.67376	7.40146	7.50024	7.63954	7.56407	7.48284	7.54735	NA	NA	NA	NA	NA	NA	NA	NA	NA
1623358_at	CG30381	5	7.33355	6.81591	7.05973	6.84926	6.96197	6.96133	7.01006	6.84465	7.21505	7.0192	7.06043	7.06584	6.89816	7.11578	7.03427	6.95853	7.22874	6.95373	7.25347	6.87197	7.20029	7.14785	6.98121	6.85055	6.79477	6.94661	7.07962	7.44652	6.93391	7.3649	6.92613	7.16645	7.1094	7.19582	7.26934	7.25653	0.690415	0.516666	0.0247973	0.223703	0.352862	0.107751	0.337989	0.398722	0.0829541
1623359_at	stwl	5	6.51949	6.38861	6.05138	6.3428	6.66778	6.38948	6.75347	6.38756	6.58509	6.91142	7.04317	6.79499	7.0144	6.44615	6.6721	5.68489	7.13399	6.30746	6.33023	6.50861	6.455	6.78217	6.58188	6.96778	6.47476	6.59148	7.00394	7.16845	6.58983	6.41062	6.5558	6.59933	6.83898	6.98629	6.51396	5.79964	0.972192	0.596115	0.00411808	0.708094	0.522389	0.0581541	0.77553	0.543713	0.054036
1623360_at	CG32534	5	5.5401	5.43599	5.55817	5.59583	5.60979	5.39619	5.56207	5.49713	5.35934	5.45681	5.38157	5.55396	5.58025	5.5011	5.405	5.63394	5.33568	5.52381	5.31794	5.54783	5.40238	5.5815	5.59313	5.33964	5.6225	5.43222	5.36277	5.54627	5.41837	5.44166	5.59107	5.50586	5.57648	5.52612	5.59191	5.47084	NA	NA	NA	NA	NA	NA	NA	NA	NA
1623361_at	---	5	3.91328	3.86349	3.81214	3.98557	3.92718	4.0471	3.99294	4.10935	3.87715	3.73977	3.85791	3.92827	3.99078	3.93514	3.86553	4.0665	3.85317	3.87619	3.94185	3.76795	4.04276	4.09612	4.09543	3.81784	3.61855	3.97981	3.47696	4.07751	4.05012	4.2209	4.02869	3.9193	3.81395	3.95196	4.26786	3.71265	NA	NA	NA	NA	NA	NA	NA	NA	NA
1623362_at	---	5	4.73408	5.00556	4.95518	4.55469	4.95617	4.6748	4.86875	4.59512	4.98399	4.74463	4.69689	4.79812	4.73196	4.77154	4.75082	4.90425	4.57003	4.61772	4.70862	4.76305	4.66098	4.78465	4.66169	4.60741	4.71874	4.34705	4.67993	4.53078	4.5468	4.48734	4.56109	4.9502	4.73935	4.75889	4.81074	4.73936	NA	NA	NA	NA	NA	NA	NA	NA	NA
1623364_at	CG4250	5	12.4766	12.7292	12.4422	12.9998	12.6489	12.9782	12.5395	12.3927	12.4468	12.5043	12.1214	12.6336	12.5996	12.8839	12.6971	13.2256	12.5204	12.8585	12.9119	13.0915	12.5549	12.5129	12.6934	12.7857	12.8619	12.5607	12.6281	12.2095	12.4621	12.3817	12.4713	12.5016	12.3807	12.2129	12.5448	12.7495	0.0172821	0.112334	0.201833	0.466571	0.444124	-0.0790503	0.0127301	0.0953452	-0.280884
1623365_at	Bgb	5	8.59081	7.75169	8.04708	7.9203	8.12189	7.76766	8.03826	8.12601	8.17875	8.25679	8.35602	8.07936	8.28887	8.15681	8.16139	7.6609	8.51112	7.92133	8.07812	7.81857	7.95148	8.01619	7.9089	7.8863	8.04619	7.85662	8.36992	8.8781	8.10507	8.12516	8.11494	8.12648	8.15894	8.47759	8.22724	8.29964	0.39368	0.418215	-0.0728876	0.231765	0.357175	0.129272	0.13	0.299228	0.202159
1623366_at	mRpL19	5	9.46153	9.23959	9.23153	9.04103	9.34103	9.15975	9.54024	9.32964	9.72773	9.5064	9.38132	9.25599	9.21468	9.33783	9.06541	9.22737	9.45635	9.18702	9.46542	9.10593	9.44254	9.55879	9.33581	9.40614	9.2459	9.20155	9.37188	9.39841	9.26909	9.42923	9.29098	9.36481	9.43113	9.40739	9.39782	9.46799	0.483875	0.450382	-0.0343726	0.934946	0.586695	0.0050317	0.457714	0.440896	0.0394043
1623367_at	---	5	3.32415	3.46052	3.6077	3.26619	3.13765	3.39878	3.31746	3.21649	3.15433	3.30948	3.23153	3.31354	3.36393	3.44473	3.22299	3.11818	3.13409	3.17628	3.20898	3.09211	3.47471	3.27239	3.28653	3.25854	3.30811	3.2837	3.24079	3.27553	2.975	3.19982	3.2814	3.31704	3.30198	3.44633	3.22644	3.34149	NA	NA	NA	NA	NA	NA	NA	NA	NA
1623368_at	---	5	3.77876	4.31274	4.05014	4.06114	3.83235	4.06285	4.12684	3.7454	3.94462	4.09395	4.08156	3.93279	3.91276	4.10188	3.96394	3.57274	3.85783	3.90176	4.01115	3.83655	4.01262	3.81058	4.0744	3.90834	3.99752	3.73373	3.77255	4.01932	3.98381	3.60241	4.01023	3.96866	3.59137	4.15189	3.97555	4.07449	NA	NA	NA	NA	NA	NA	NA	NA	NA
1623369_at	---	5	3.76454	3.73752	3.59607	3.55785	3.7333	3.97718	3.94283	3.73405	3.56467	3.62204	3.70761	3.74285	3.48795	3.93635	3.64398	3.72478	3.63673	3.73836	3.66042	3.88534	3.74264	3.77157	3.79706	3.65988	3.62917	3.68389	3.63815	3.6974	3.50596	4.14473	3.74467	3.72527	3.79621	3.65351	4.10834	3.8893	NA	NA	NA	NA	NA	NA	NA	NA	NA
1623370_at	wek	5	7.99364	7.52845	7.40855	7.49069	7.45821	7.4592	7.73825	7.61672	7.98132	7.81937	7.92353	7.77407	7.87371	7.74243	7.65345	7.38218	7.94668	7.38606	7.53082	7.44236	7.67451	7.84469	7.58505	7.66552	7.65949	7.36444	8.10602	8.22984	7.61227	7.80304	7.70448	7.85314	7.73724	7.89471	8.01144	7.63337	0.592889	0.48658	-0.0387124	0.258239	0.367079	0.118124	0.168043	0.32458	0.156837
1623372_at	CG5873	5	3.8037	4.07126	4.49079	3.85059	3.76625	3.94403	3.7677	3.90743	4.006	3.90673	3.73034	3.87717	4.39929	3.683	4.42692	3.90997	4.43695	3.9081	4.13606	3.87092	3.8876	4.11135	3.83181	4.02896	3.68938	4.36293	4.13412	4.05262	3.52124	3.97656	4.02158	3.54182	4.01997	4.1134	4.09586	3.79688	NA	NA	NA	NA	NA	NA	NA	NA	NA
1623374_a_at	Fim	5	10.3429	10.6368	10.5352	11.0594	11.104	11.2743	11.3179	11.0585	10.8	11.1336	11.183	11.4003	11.1031	10.3864	11.0821	10.5787	11.1179	11.3491	11.2986	11.1143	11.0743	11.3326	11.3895	11.3537	11.2089	11.1509	11.0786	10.8561	11.1063	10.8453	10.965	11.0274	11.2551	11.0474	10.4553	11.0014	0.266569	0.370077	0.111191	0.92923	0.58549	0.0126587	0.444755	0.436266	-0.0985322
1623375_at	Cep135 /// DmirCG17081	5	7.24882	6.70993	6.36925	6.65039	6.68672	6.52824	6.80003	6.87708	6.95255	7.05606	7.03656	6.79977	6.76934	6.62829	6.3944	6.14237	6.94283	6.31747	6.75181	6.46548	6.61223	6.87333	6.59203	6.86752	6.78102	6.68159	7.13977	7.18736	6.73948	6.81796	6.78142	6.88707	6.791	6.92339	6.73887	6.76517	0.0182637	0.116264	-0.196526	0.671578	0.511281	0.0432239	0.045831	0.190108	0.23975
1623376_s_at	Nmda1	5	11.2805	11.6129	11.7641	12.2167	11.7301	11.9637	11.6777	11.8201	11.3194	11.4036	11.4433	12.0111	11.3594	11.4377	11.7486	11.7108	11.3352	11.5722	11.3423	11.7666	11.49	11.1608	11.3424	11.8841	11.5795	11.7764	11.4707	11.1946	11.7722	11.474	11.6443	11.4746	11.3991	11.2467	11.4154	11.5136	0.0136213	0.0986658	-0.17443	0.0973768	0.267365	-0.19017	0.862415	0.567784	-0.0157407
1623377_at	CG14841	5	3.651	3.98603	3.96891	3.90505	3.98643	3.82313	3.91897	3.81212	4.13963	3.92805	3.8849	4.04162	3.82071	3.77167	3.83239	4.10145	3.88472	3.95747	3.86356	3.84046	3.94166	4.00834	3.78583	3.94886	3.81222	3.84331	4.03946	3.78661	3.87287	4.09211	4.15478	4.10539	3.85931	3.96965	3.92305	3.83986	NA	NA	NA	NA	NA	NA	NA	NA	NA
1623378_at	Oli	5	5.39094	5.82542	5.58564	6.16457	5.73043	5.99843	5.53649	5.36318	5.2864	5.50692	5.46731	5.49012	5.93289	5.50134	6.15497	6.01522	5.20503	6.16815	5.91238	6.10764	5.52928	5.35071	5.54339	5.53159	5.78351	5.84858	5.45474	5.23817	5.70794	5.76735	5.74648	5.63001	5.54585	5.49361	5.35125	5.50185	0.252323	0.365433	0.133896	0.818867	0.556016	-0.0230421	0.190366	0.336454	-0.156938
1623379_at	Mer	5	8.059	7.89681	7.84381	7.71915	7.5602	7.61415	7.70485	7.89269	7.98491	7.84393	7.93956	7.92777	7.85226	7.94819	7.80821	7.65238	7.90263	7.59332	7.81118	7.55248	7.81363	7.90943	7.75894	7.81346	7.69371	7.70544	7.91794	8.25421	7.81824	8.06235	7.87388	7.79692	7.7701	7.96651	8.01149	7.95439	0.3742	0.410688	-0.04756	0.381601	0.41349	0.0698628	0.128181	0.297579	0.117423
1623380_at	---	5	3.66027	3.88362	3.70842	3.73825	3.80304	3.70262	3.84942	3.80236	3.82002	3.64914	3.68287	3.64547	3.62702	3.54566	3.72198	3.83259	3.75143	3.51461	3.62846	3.79458	3.32331	3.70285	3.49188	3.76606	3.6287	4.00145	3.47129	3.6972	3.70767	3.99568	3.97024	3.51835	3.71721	4.20767	3.90387	3.59212	NA	NA	NA	NA	NA	NA	NA	NA	NA
1623381_at	---	5	3.15136	3.21014	3.25983	3.04701	3.23005	3.43015	3.44246	3.08126	3.17049	3.31634	3.22018	3.27588	3.29694	3.40073	2.96488	3.36336	3.37431	3.0667	3.41752	3.2905	3.43293	3.24166	3.23201	3.20743	3.30017	3.05653	3.26329	3.23073	2.99555	3.28228	3.07942	3.27181	3.28386	3.26394	3.1242	3.52655	NA	NA	NA	NA	NA	NA	NA	NA	NA
1623382_at	---	5	3.66683	3.64152	3.60565	3.62135	3.94604	3.63333	3.70544	3.69716	3.69566	3.65351	3.82265	3.842	3.47685	3.69445	3.49424	3.74842	3.69066	3.74057	3.90909	3.60005	3.81107	3.58547	3.66823	3.49843	3.68168	3.55218	3.54931	3.74092	3.52863	3.69815	3.79422	3.78716	3.71262	3.57447	3.84091	3.65204	NA	NA	NA	NA	NA	NA	NA	NA	NA
1623383_at	Dhc64C	5	10.1802	9.98946	9.91397	9.94528	9.9677	9.9126	9.90898	9.91447	10.0749	10.0424	10.2373	9.97092	10.0587	10.0204	9.93089	9.69558	10.0895	9.74784	9.72618	9.80899	10.0151	9.88017	9.97559	9.97662	10.0109	9.92495	10.0674	10.0185	9.69546	9.84139	9.76539	9.89479	9.98651	9.99365	9.91828	9.86134	0.0191661	0.119593	-0.0943908	0.0365577	0.169129	-0.0899699	0.931879	0.586107	0.00442093
1623384_at	ytr	5	10.4191	10.3684	10.31	10.7252	10.7376	10.6291	10.8186	10.7808	10.468	10.828	10.8699	10.6351	10.7928	10.2575	10.6472	10.4388	10.7443	10.7201	10.6521	10.6375	10.6661	10.8651	10.7266	10.7599	10.6379	10.8048	10.7452	10.6709	10.7086	10.5432	10.5332	10.5407	10.8487	10.8482	10.2981	10.2923	0.666301	0.509513	0.0265081	0.918551	0.582867	-0.00983643	0.661808	0.508064	-0.0363445
1623385_at	---	5	3.75194	3.34943	3.60113	3.4227	3.39006	3.38026	3.42923	3.48851	3.37049	3.27973	3.28804	3.60063	3.29102	3.64815	3.32257	3.32743	3.34001	3.3401	3.42936	3.47408	3.15875	3.43573	3.32585	3.35063	3.54782	3.29212	3.32171	3.42786	3.3053	3.47736	3.47412	3.45047	3.35997	3.40321	3.53298	3.34237	NA	NA	NA	NA	NA	NA	NA	NA	NA
1623386_s_at	CG14438 /// DmirCG14438 /// DsimCG14438	5	7.40114	6.81181	6.76173	6.99322	6.86194	6.62942	6.91164	7.20119	7.11717	7.14411	7.42995	6.93255	7.03614	7.08474	6.91138	6.60644	7.15569	6.74741	6.74638	6.86662	7.08118	7.05327	6.92484	7.0777	6.98402	6.91254	7.14129	7.46055	6.84657	6.9953	7.01877	7.01983	6.90666	7.22966	7.09612	6.95143	0.364351	0.407254	-0.0753397	0.714771	0.523869	0.0305735	0.25824	0.367079	0.105913
1623387_at	Bap55	5	8.9103	8.41878	8.38995	8.3446	8.53292	8.33644	8.5251	8.64093	8.8806	8.82058	8.88444	8.65658	8.61033	8.68266	8.52433	8.25432	8.81371	8.27918	8.4908	8.33116	8.68458	8.67666	8.60541	8.52695	8.46965	8.29498	8.83466	8.92454	8.42382	8.68774	8.40355	8.59187	8.70624	8.81258	8.80403	8.62509	0.248179	0.363806	-0.0717586	0.817825	0.55591	0.0197958	0.332676	0.39619	0.0915545
1623388_at	CG15861	5	6.67625	6.94386	6.54666	6.56616	6.63624	6.34605	7.23792	6.66306	6.95039	6.90731	6.88995	6.73025	6.72347	7.0125	6.6451	6.21327	7.15305	6.61736	7.16518	6.67673	6.58218	7.32739	7.15765	7.16388	6.6334	6.65771	6.93439	7.10891	6.62829	6.807	6.9666	7.11987	7.06144	7.04335	7.03582	7.17012	0.20427	0.343515	0.111971	0.061783	0.218556	0.172732	0.617732	0.494615	0.0607617
1623389_at	Ddr	5	4.06808	4.18392	4.05551	3.98029	4.17494	4.16374	4.26763	4.02788	3.96999	3.99018	4.25718	4.1359	3.96638	4.03376	3.91436	4.27139	4.21656	4.08614	4.16511	3.83817	4.00561	4.33782	4.04545	4.06173	4.1768	3.94848	4.14973	4.1339	4.10643	3.9441	3.99045	4.2827	4.06992	4.01164	4.05948	4.07307	NA	NA	NA	NA	NA	NA	NA	NA	NA
1623390_at	CG11768	5	5.45911	6.12075	5.5124	5.70336	5.47135	5.40231	5.09464	5.33277	5.32961	5.08757	5.09262	5.16034	5.13316	5.53923	5.54038	5.93916	5.12814	5.69516	5.60928	5.63438	5.46754	5.43214	5.50668	5.13546	5.45525	5.58159	5.32011	5.02981	5.75618	5.367	5.61104	5.5862	5.38522	5.30946	5.39714	5.64001	NA	NA	NA	NA	NA	NA	NA	NA	NA
1623391_at	sisA	5	4.48301	4.44555	4.35364	4.52631	4.67579	4.77464	4.66508	5.18516	4.35734	4.75285	4.53674	4.62895	4.62556	4.61478	4.27715	4.19008	5.17865	4.16023	4.73706	4.22347	4.59565	4.70304	4.73382	4.40979	4.59518	4.45718	4.79074	5.0605	4.41195	4.60864	4.61913	4.66111	4.57927	4.58396	4.16119	4.51379	NA	NA	NA	NA	NA	NA	NA	NA	NA
1623392_at	Camta	5	3.84663	3.87691	3.8915	3.76131	3.94177	3.74117	3.6353	4.00117	3.9392	3.9368	3.85116	3.89635	4.07843	3.95961	3.73221	3.77381	3.7576	3.86047	3.57288	3.87602	3.73651	3.91114	3.84573	3.64873	3.88513	3.92739	3.79335	3.60918	3.72349	3.58954	3.8528	3.90133	3.88959	4.11252	3.84455	4.15852	NA	NA	NA	NA	NA	NA	NA	NA	NA
1623393_a_at	CG3277	5	6.48297	6.45556	6.35014	6.33622	6.49771	6.50577	6.45861	6.83703	6.50978	6.49999	6.68645	6.25531	6.31038	6.8027	6.34082	6.80904	6.26632	6.4927	6.50035	6.63763	6.40917	6.44717	6.81909	6.43314	6.49175	6.44819	6.50825	6.2336	6.35339	6.88619	6.66716	7.04156	6.61043	6.05592	7.01631	6.45566	0.611672	0.492492	0.0327458	0.284145	0.377631	0.0744037	0.654583	0.505807	0.0416579
1623394_at	CG42260	5	5.23442	5.30162	5.43202	5.25237	5.23528	5.45007	5.241	5.03933	5.43634	5.22893	5.236	5.28567	5.00052	5.52703	5.25831	5.54295	5.18104	5.06611	5.04858	5.28633	5.38445	4.98952	5.20462	4.86547	5.33397	5.08139	5.12708	5.055	5.22776	5.10981	5.14784	5.44026	5.11803	5.47476	5.32259	5.33484	NA	NA	NA	NA	NA	NA	NA	NA	NA
1623395_at	---	5	3.63791	3.71702	3.45468	3.62174	3.64897	3.84776	3.70143	3.617	3.72568	3.49587	3.41557	3.60126	3.66546	3.59984	3.4841	3.67142	3.55475	3.34151	3.38405	3.66866	3.71895	3.64027	3.67003	3.36371	3.49402	3.55868	3.39608	3.62041	3.44954	3.50105	3.68651	3.44408	3.49163	3.78164	3.63282	3.64752	NA	NA	NA	NA	NA	NA	NA	NA	NA
1623396_at	CG13875	5	4.0048	4.22469	4.43909	4.44284	4.21495	4.26287	4.29192	4.13354	4.24176	4.37845	3.98181	4.30864	4.59647	3.95198	4.52518	4.4201	4.17083	4.62188	4.66093	4.49955	4.00965	4.11956	4.04156	4.80906	4.35964	4.44901	4.22034	4.08543	4.14047	4.19672	4.40941	4.20308	3.96126	4.27022	4.4584	4.29588	NA	NA	NA	NA	NA	NA	NA	NA	NA
1623397_at	---	5	3.46497	3.33549	3.5361	3.3205	3.73913	3.62507	3.63252	3.60333	3.5242	3.28043	3.43182	3.5558	3.66024	3.5149	3.3823	3.58442	3.50231	3.47409	3.36581	3.42796	3.33939	3.5434	3.36953	3.23367	3.57532	3.53591	3.37904	3.40565	3.26783	3.25602	3.58469	3.41502	3.19635	3.47571	3.84764	3.9469	NA	NA	NA	NA	NA	NA	NA	NA	NA
1623398_at	CG4830	5	6.41291	6.68002	7.31596	6.52665	6.86027	6.17481	6.8162	7.74775	6.48443	7.27977	7.69151	6.28446	7.34713	6.4476	7.26817	6.88487	6.94443	5.70749	7.1755	7.47034	6.37403	7.79412	7.44705	6.23742	6.9523	6.99641	6.40237	6.96363	7.5476	7.00799	6.33536	6.92899	6.77506	6.98308	6.92639	7.33898	0.565578	0.477543	0.0686177	0.720031	0.525969	0.0736195	0.982515	0.598643	0.00500173
1623399_at	---	5	3.91329	3.82463	4.08245	3.79504	3.7078	3.77752	3.6697	3.78865	3.68342	3.54725	3.86443	3.63407	3.61509	3.86977	3.77249	3.97125	3.70217	3.64182	3.73681	3.66114	3.70881	3.68463	3.81447	3.87812	3.72596	3.63414	3.49314	3.48499	3.74496	4.00331	3.63218	3.77284	3.65954	3.72807	3.78054	4.00906	NA	NA	NA	NA	NA	NA	NA	NA	NA
1623400_at	---	5	4.21904	4.31445	4.38653	4.01619	4.46325	4.34858	4.35253	4.04967	4.47466	4.07966	4.2041	4.35877	4.09948	4.0935	4.0145	4.42096	4.27485	4.08522	4.10406	4.22102	4.2993	4.20015	4.35615	4.32788	4.24863	4.10024	4.19479	4.10377	4.2712	4.05913	4.29259	4.21635	4.18057	4.18966	4.23158	4.36944	NA	NA	NA	NA	NA	NA	NA	NA	NA
1623401_a_at	row	5	7.63565	7.23488	6.71223	7.26858	7.09445	7.21809	7.23517	7.28379	7.37335	7.38927	7.51838	7.26809	7.42589	7.45841	7.38945	6.85899	7.71211	7.04234	7.10114	6.90942	7.08851	7.33128	7.27205	6.98615	7.12329	7.15975	7.45135	7.74909	7.39638	7.42935	7.17113	7.41399	7.32224	7.53683	7.22303	6.80783	0.61574	0.494155	-0.0546828	0.674272	0.512123	0.0460267	0.36434	0.407254	0.100709
1623402_at	Arc-p34	5	11.496	11.0083	11.0992	11.3282	11.5407	11.1715	11.6829	11.5548	11.5831	11.7729	11.874	11.7219	11.6238	11.396	11.3861	10.8288	11.851	11.1789	11.3833	11.0796	11.5118	11.6878	11.5396	11.7106	11.4248	11.1892	11.7816	11.8476	11.4126	11.4338	11.3235	11.3603	11.5973	11.7153	11.5411	11.3098	0.542563	0.469682	-0.0546598	0.932441	0.586175	0.00863654	0.59212	0.486441	0.0632963
1623403_s_at	CkIalpha	5	10.9338	10.9255	11.0461	11.6035	11.5658	11.4192	11.5788	11.5373	11.1274	11.51	11.637	11.7907	11.7316	10.8885	11.6938	11.0293	11.6142	11.4878	11.451	11.4559	11.6362	11.5155	11.5827	11.401	11.5306	11.587	11.5963	11.7167	11.6139	11.3411	11.1949	11.2402	11.6503	11.7259	10.8887	11.2187	0.571327	0.47911	0.0676786	0.712003	0.523417	0.0524252	0.895524	0.576692	-0.0152534
1623404_at	CG16890	5	8.08517	8.07559	8.13052	8.14021	8.13176	8.28686	8.33562	8.03382	8.01582	8.10514	8.06087	8.34477	8.07515	7.8387	8.03798	7.90286	8.30599	8.18908	8.34978	8.21765	8.13409	8.28219	8.15707	8.65837	8.10303	8.20479	8.19057	8.08138	8.22696	8.1685	8.25137	8.02101	8.2876	8.10529	8.00226	8.1631	0.518628	0.460593	0.0335645	0.890451	0.5752	0.00497474	0.669006	0.510515	-0.0285897
1623405_at	pav	5	8.68849	7.26268	7.44341	7.70576	8.12849	7.50182	8.15387	8.25488	8.34173	8.54458	8.70036	8.38843	8.42231	8.10092	8.01292	7.03131	8.82022	7.23527	8.00337	7.46757	8.06482	8.41376	8.14063	8.26189	7.95038	7.44656	8.73408	9.07968	8.04274	8.09234	7.8639	8.33859	8.5555	8.80852	8.3742	8.16763	0.54554	0.470911	-0.094957	0.30811	0.386869	0.194969	0.232062	0.357195	0.289926
1623406_at	---	5	3.87026	3.77444	3.88475	3.67903	3.65143	3.833	3.33298	3.75744	3.58396	3.87108	3.64752	3.69103	3.77	3.61983	3.82024	3.63442	3.40324	3.74168	3.61441	3.69223	4.0716	3.65975	3.85146	3.69827	3.5952	3.56515	3.36699	3.76402	3.6731	3.82269	3.51973	3.7632	3.79281	3.87001	3.98287	3.84762	NA	NA	NA	NA	NA	NA	NA	NA	NA
1623407_at	CG10298	5	3.99997	3.76798	3.87591	4.02717	4.53352	4.15742	4.47106	4.32913	4.27907	4.2381	4.45931	4.53971	4.26312	4.04141	4.17252	4.14183	4.21442	4.18046	4.30709	4.24762	4.24153	4.12035	4.46414	4.19604	4.1693	4.26139	4.27249	4.13509	4.10737	4.29949	4.39698	4.11289	4.42531	4.4314	4.15439	4.69593	NA	NA	NA	NA	NA	NA	NA	NA	NA
1623408_s_at	CG2947	5	11.0443	11.0931	10.852	11.3493	11.5667	11.2599	11.6009	11.4508	11.5825	11.4736	11.6863	11.6414	11.4814	10.9062	11.4027	10.9202	11.6703	11.2284	11.3705	11.181	11.5307	11.5497	11.5051	11.3963	11.4473	11.4356	11.6949	11.8128	11.5117	11.2107	11.2712	11.3518	11.5297	11.7325	11.2043	11.4279	0.658798	0.506922	-0.0381915	0.450565	0.438041	0.0858084	0.21429	0.348348	0.124
1623409_at	---	5	3.93821	3.81387	3.9798	3.70532	4.0139	3.89009	4.00846	3.89044	3.67869	3.74997	3.619	3.86944	3.83513	4.17873	3.87623	3.87072	3.83974	3.86295	3.64064	3.76461	4.06099	3.86934	3.85498	3.89925	4.08264	3.56331	3.96637	4.11615	3.68112	4.02393	3.75883	4.03559	3.77077	3.79773	3.85661	4.13633	NA	NA	NA	NA	NA	NA	NA	NA	NA
1623410_at	Pxd	5	3.39503	3.3609	3.96001	3.03367	3.37989	3.32392	3.38489	3.48039	3.3844	3.29995	3.12351	3.37959	3.4052	3.4878	3.33645	3.17832	3.53304	3.3976	3.61765	3.15343	3.30659	3.60264	3.17509	3.51154	3.2837	3.26778	3.48028	3.59365	3.63384	3.37396	3.61506	3.29259	3.42903	3.23208	3.27156	3.53227	NA	NA	NA	NA	NA	NA	NA	NA	NA
1623411_at	lola	5	7.85623	7.19567	7.48936	7.34394	7.41072	6.97097	7.50857	7.50996	7.69183	7.69216	7.70534	7.75726	7.64347	7.5621	7.25384	6.93849	7.66992	7.08599	7.20855	7.13453	7.24702	7.5627	7.47249	7.50037	7.34671	7.19024	7.74818	7.98579	7.35659	7.37955	7.45291	7.47735	7.50528	7.67559	7.68353	7.39759	0.066665	0.227255	-0.154379	0.951616	0.590683	0.00560759	0.192935	0.338061	0.159987
1623412_a_at	CG17150 /// DmirCG17150	5	4.46132	4.48683	4.39392	4.31781	4.50821	4.47704	4.43894	4.33068	4.58749	4.17637	4.43524	4.64852	4.44459	4.56863	4.39243	4.41721	4.30442	4.19165	4.25571	4.35242	4.50229	4.41872	4.41432	4.2792	4.40477	4.37761	4.27658	4.36331	4.27219	4.36302	4.49	4.27758	4.36204	4.61869	4.33839	4.52517	NA	NA	NA	NA	NA	NA	NA	NA	NA
1623413_at	---	5	3.76668	3.90881	3.82799	3.90167	3.78191	3.77907	3.65145	3.78976	3.77125	3.84454	3.88102	3.82136	3.75194	3.70644	3.60388	3.80746	3.74751	3.73619	3.65679	3.74731	3.72792	3.95724	3.78998	3.89154	3.67466	3.75095	3.49205	4.01391	3.79185	3.64833	3.80011	4.11657	3.5626	3.70385	3.99861	3.7633	NA	NA	NA	NA	NA	NA	NA	NA	NA
1623414_at	---	5	3.96073	3.86176	4.05772	3.57841	3.78763	4.00341	4.02637	3.72659	4.48706	3.99228	3.73215	4.04411	3.60038	3.7249	3.61507	4.06231	3.81877	3.86144	3.63309	4.00551	3.99495	3.98358	3.87984	3.67363	3.7892	3.95346	3.73243	3.86563	3.77825	4.00889	3.88935	3.99181	4.09791	4.02526	4.02789	4.09876	NA	NA	NA	NA	NA	NA	NA	NA	NA
1623415_at	---	5	7.66974	8.48723	8.38063	8.69641	8.33692	8.56944	7.7429	7.8871	7.49235	7.69003	7.96589	8.09867	8.14369	7.92455	8.52513	8.21505	7.86436	8.48128	8.1323	8.6529	7.67463	7.787	8.17603	8.44122	8.30751	8.71818	7.83376	7.16279	8.43185	7.91638	8.40413	8.11972	7.92907	7.68484	7.88198	7.51285	0.499565	0.454332	0.0834011	0.624017	0.496943	-0.0928536	0.326716	0.393661	-0.176255
1623417_at	---	5	3.55127	3.70054	3.66865	3.51756	3.79704	3.7397	3.63105	3.36953	3.60804	3.76505	3.71897	3.86291	3.53633	3.77832	3.71012	3.7961	3.79374	3.69479	4.07985	3.62748	3.36747	3.87785	3.66218	3.59379	3.73496	3.52009	3.51981	3.52485	3.53193	3.66999	3.7525	3.6961	3.3927	3.69739	3.8714	4.1369	NA	NA	NA	NA	NA	NA	NA	NA	NA
1623418_at	Cad96Ca	5	7.00416	7.69394	7.71881	7.62087	6.8042	7.38044	6.71806	7.07005	6.41344	6.7627	6.73937	6.72483	7.42693	7.12078	7.57101	7.32188	6.50622	7.45117	7.26506	7.52095	6.59457	6.79894	6.93753	7.12939	7.20892	7.55042	6.6017	6.12334	7.35602	6.88077	7.04274	6.96722	6.60001	6.40015	6.64556	6.53478	0.43355	0.432593	0.0827967	0.206086	0.344047	-0.22827	0.080531	0.247313	-0.311066
1623419_s_at	CG31358	5	5.03269	5.17517	4.74678	4.91142	5.2048	5.20252	5.13066	5.02821	5.22578	5.04994	4.89033	5.03289	4.78383	5.32852	4.69093	5.31262	5.08161	5.04286	4.88621	5.18623	5.16329	5.12896	5.12595	4.89445	5.1333	5.05444	5.16092	5.05535	4.87781	5.15303	5.07746	5.1685	4.89514	5.07235	5.34182	5.41759	NA	NA	NA	NA	NA	NA	NA	NA	NA
1623420_at	---	5	3.02615	3.135	3.40335	3.25561	3.3307	3.3696	3.50063	3.11257	3.20615	3.1036	3.24908	3.57651	3.01704	3.19012	3.17424	3.29718	3.19959	3.41813	3.02345	3.18753	3.16148	3.14316	3.16801	3.09833	3.27611	3.02216	3.2865	3.24867	3.24153	3.21162	3.23808	3.3715	3.07651	3.20952	3.14361	3.58376	NA	NA	NA	NA	NA	NA	NA	NA	NA
1623421_at	CG6347	5	3.96785	4.27604	4.34976	4.10619	4.02729	3.82327	3.96502	3.84965	4.04101	3.91559	3.87256	4.23399	3.8982	3.88841	3.87112	3.90137	3.7563	3.80508	3.90105	3.85379	3.75759	3.55622	3.82982	3.96289	3.93097	3.72864	3.95465	4.02315	3.86216	3.83874	3.87323	3.87952	3.90467	3.91724	4.13197	3.84913	NA	NA	NA	NA	NA	NA	NA	NA	NA
1623422_a_at	ade3 /// CG31908	5	10.5363	10.4341	10.5423	10.495	10.5385	10.5276	10.5481	10.4947	10.718	10.5492	10.6257	10.7065	10.3467	10.5207	10.4201	10.4182	10.6332	10.3483	10.3721	10.3727	10.524	10.5127	10.3586	10.5189	10.4699	10.4049	10.5516	10.713	10.545	10.5444	10.5637	10.4901	10.4752	10.5577	10.621	10.5143	0.00496743	0.0539305	-0.114157	0.516605	0.459943	-0.0220972	0.0379081	0.172545	0.0920599
1623423_at	---	5	4.22549	4.043	4.59918	4.05002	4.27332	4.08268	4.25974	4.45236	4.13608	4.00738	4.00791	4.49133	3.89054	4.50768	3.94389	4.35677	4.31236	4.10236	4.37531	4.32669	4.56028	4.19382	4.27595	4.23839	4.07796	4.14388	4.16693	4.18602	4.12972	3.94251	4.25326	4.57627	4.17659	4.36549	4.42921	4.38882	NA	NA	NA	NA	NA	NA	NA	NA	NA
1623424_a_at	babo	5	8.84796	8.61536	8.58906	8.71648	8.43898	8.46928	8.46989	8.77967	8.73477	8.68142	8.65891	8.80414	8.54498	8.71147	8.59422	8.31696	8.70062	8.13245	8.36237	8.11501	8.61685	8.59604	8.49523	8.47556	8.442	8.23354	8.7424	9.06145	8.63337	8.68435	8.53539	8.58425	8.61857	8.83082	8.68088	8.4566	0.0289678	0.150182	-0.178681	0.741003	0.532436	-0.0251937	0.13305	0.301401	0.153487
1623425_at	Buffy	5	8.53564	8.74798	8.5081	8.60392	8.41725	8.37794	8.12202	8.35234	8.0954	8.17949	8.32294	7.96372	8.4239	8.35592	8.49907	8.72247	8.06735	8.44903	8.40117	8.53594	8.1085	8.0616	8.38189	8.0961	8.46103	8.49044	8.0692	7.9526	8.45462	8.06171	8.15721	8.4823	8.13869	7.89528	8.19463	8.02045	0.863411	0.567929	-0.0103193	0.0469245	0.192346	-0.15405	0.123618	0.293793	-0.143731
1623426_at	CG31633	5	8.41695	8.48743	8.5269	8.6081	8.35267	8.52066	8.48212	8.4693	8.48643	8.46989	8.4494	8.69217	8.33194	8.53645	8.45947	8.56221	8.43445	8.49889	8.45306	8.52325	8.33202	8.60819	8.41823	8.65911	8.41536	8.57216	8.45773	8.46237	8.68571	8.49391	8.62784	8.49451	8.5874	8.51047	8.54002	8.59043	NA	NA	NA	NA	NA	NA	NA	NA	NA
1623427_at	CG7179	5	4.25322	4.29277	4.67472	4.28962	4.5364	4.59948	4.6177	4.34751	4.16156	4.32148	4.25724	4.39066	4.60308	4.83659	4.58614	4.42164	4.80074	4.55128	4.54169	4.59241	4.59742	4.45719	4.51444	4.66091	4.10441	4.19915	4.57974	4.63379	4.38958	4.31282	4.28873	4.50294	4.57339	4.50267	4.80919	4.92783	NA	NA	NA	NA	NA	NA	NA	NA	NA
1623428_at	CG14933 /// CG42486	5	12.5294	12.9415	12.7448	13.1287	12.7506	13.0977	12.7821	12.6836	12.5534	12.5552	12.4384	12.8294	12.9515	12.9486	12.7987	12.929	12.6052	12.8306	12.7841	13.1249	12.7335	12.6147	12.599	12.9083	12.9323	12.8126	12.7063	12.6728	12.9836	12.627	12.6235	12.6169	12.6197	12.4783	12.4991	12.8273	0.316476	0.389804	0.066111	0.474303	0.447334	-0.052942	0.0635261	0.221891	-0.119053
1623429_at	CG11073	5	8.60717	9.31003	9.26466	9.37885	8.6944	8.92788	8.39238	8.72201	8.01504	8.2761	8.45464	8.73261	8.93551	9.00601	9.26135	9.47251	8.24932	8.74841	8.75553	9.36165	8.57924	8.42588	8.99934	8.84322	8.96277	9.4294	8.48658	7.99592	8.9649	8.47772	8.8637	8.86545	8.1039	8.32058	8.68632	8.56323	0.151914	0.314771	0.155184	0.582165	0.483008	-0.087943	0.163969	0.322562	-0.243127
1623430_at	Phm	5	7.84705	8.06003	8.12853	8.28617	7.9388	8.30911	8.041	7.91097	7.86623	7.67424	7.73025	8.1449	7.8645	7.95516	7.94236	7.84912	7.88633	7.94307	7.85921	8.08327	7.62052	7.65983	7.63293	8.27296	7.98007	7.94719	7.70563	7.69889	7.99283	7.8116	7.9279	8.03447	7.59871	7.5203	7.69107	7.73683	0.0535016	0.205479	-0.113999	0.0204936	0.124052	-0.190983	0.172475	0.32685	-0.0769831
1623431_at	CG13423	5	4.13809	4.36592	4.31442	4.61586	4.47461	4.94273	4.42791	4.32095	4.18724	4.14124	4.18494	4.19452	4.1241	4.33183	4.3622	4.76307	4.46903	4.52672	4.25585	4.26177	4.35161	4.19966	4.22808	4.46927	4.18051	4.46464	4.65289	4.20814	4.23995	4.33925	4.41343	4.43347	4.28163	4.34417	4.32268	4.21809	NA	NA	NA	NA	NA	NA	NA	NA	NA
1623432_s_at	plexB	5	6.91376	7.07011	6.92616	6.98946	6.83005	6.8629	6.82523	6.93363	6.74033	6.9562	7.017	6.63382	7.03667	6.79551	6.87585	6.9457	6.96827	6.85529	6.60489	6.84891	6.81222	6.89812	6.80393	7.11914	6.96221	6.9093	6.89229	6.95885	6.96703	7.00114	7.0618	6.86293	6.81604	6.8582	6.84555	6.21812	0.852886	0.564833	-0.0111807	0.580402	0.482428	-0.0287686	0.848024	0.563691	-0.0175879
1623433_at	CG30369	5	4.26162	3.90027	4.2889	4.18934	3.93928	4.01064	4.10415	3.99041	4.13691	4.02024	3.96321	4.09998	4.00905	4.10302	3.97997	4.03516	4.09758	4.06962	4.12305	3.83534	4.19681	4.11531	4.15844	4.01168	4.05511	3.98799	4.12191	4.22672	3.79019	3.96447	3.79485	3.87625	3.99152	4.0884	4.03184	4.11579	NA	NA	NA	NA	NA	NA	NA	NA	NA
1623434_at	CG3702	5	10.307	10.1193	10.2336	10.1975	10.3409	10.1859	10.4103	10.4635	10.4817	10.475	10.5899	10.4411	10.1053	10.2393	10.3173	10.1735	10.4277	10.0397	10.2521	10.1858	10.4156	10.4311	10.4662	10.4824	10.2044	10.3177	10.4791	10.4704	10.2316	10.3861	10.2561	10.3756	10.3418	10.3954	10.4974	10.4248	0.132686	0.30133	-0.0591357	0.818402	0.555939	0.0112359	0.152338	0.315156	0.0703716
1623435_at	---	5	3.60921	3.65797	3.6444	3.57887	3.67122	3.56015	3.50516	3.46113	3.71873	3.69713	3.56602	3.6392	3.5202	3.49393	3.39746	3.57998	3.55992	3.44524	3.46774	3.39945	3.52465	3.74728	3.68218	3.42859	3.58089	3.46817	3.49731	3.54421	3.65798	3.67798	3.72007	3.52506	3.45193	3.41615	3.76956	3.9954	NA	NA	NA	NA	NA	NA	NA	NA	NA
1623437_at	CG9948	5	4.95615	4.74867	4.9668	4.80742	5.05468	4.96467	5.14211	5.06798	5.05055	5.22243	5.17178	4.98158	5.07681	4.93894	4.92477	4.64542	5.34255	5.07579	5.30642	4.93258	4.80812	5.16792	5.05765	5.09737	4.89738	4.83555	5.18092	5.14374	5.0323	5.06493	4.89247	4.85919	5.15796	5.12535	4.81706	4.98635	NA	NA	NA	NA	NA	NA	NA	NA	NA
1623439_at	CG17744	5	3.70067	3.73619	4.06958	3.70949	4.02395	3.97552	3.9716	3.81791	3.97022	3.8573	3.86255	3.92321	3.84629	4.14058	3.675	3.95858	3.95691	3.40365	3.83532	3.74492	3.94098	3.81642	3.93582	4.03201	3.75966	4.09888	3.69464	3.83557	3.98612	3.58654	3.80557	4.08223	3.94126	4.07666	4.25717	3.81322	NA	NA	NA	NA	NA	NA	NA	NA	NA
1623440_at	CG31848	5	3.83448	3.97836	4.08034	3.88764	4.05397	4.15483	4.02277	3.91287	3.99789	3.9399	4.10253	4.1625	3.84998	3.86822	3.94329	4.0193	3.96016	3.94432	3.74234	3.96794	4.11376	4.09626	4.17148	3.73258	4.13745	3.81216	3.97264	3.80349	3.83268	4.0299	4.11758	4.06027	4.09647	3.98987	4.25473	4.06865	NA	NA	NA	NA	NA	NA	NA	NA	NA
1623441_at	ph-p	5	7.97954	8.70552	8.53709	8.70635	8.34291	8.53695	8.29315	8.21936	7.97123	8.43597	8.207	8.12936	8.24977	8.35587	8.63577	8.55297	8.33599	8.82974	8.6369	8.82267	8.32059	8.43764	8.39208	8.64674	8.39261	8.88874	8.18985	7.78195	8.51253	8.31087	8.41699	8.37313	8.48669	8.27982	8.26326	7.96895	0.0454212	0.189369	0.179357	0.883475	0.573444	-0.0165863	0.113705	0.283387	-0.195943
1623442_at	CG14088	5	4.01155	3.96495	4.12455	3.87045	4.06803	4.21271	4.16606	4.20001	4.05467	4.30856	4.16975	4.20197	4.04329	4.25451	3.99549	4.22721	4.01475	4.0016	4.0032	3.93491	4.1663	4.52155	4.17385	3.94906	3.95368	3.92605	4.20299	4.09216	4.01667	4.01922	4.40453	4.26722	4.03192	4.39182	4.16101	4.26656	NA	NA	NA	NA	NA	NA	NA	NA	NA
1623443_at	---	5	4.18716	4.22532	4.29407	4.06667	4.12598	4.14401	4.25525	4.25292	4.36716	4.21982	4.40899	4.3574	4.20012	4.17527	4.1425	4.21672	4.13396	4.18427	4.12013	4.3718	4.20101	4.46482	4.23925	4.112	4.25155	3.97615	4.14427	4.20341	4.31281	4.0865	4.12326	4.12967	4.46032	4.32679	4.33966	4.42974	NA	NA	NA	NA	NA	NA	NA	NA	NA
1623444_at	rn	5	5.31839	5.29677	5.44549	5.21763	5.38903	5.10029	5.11863	5.20639	5.35714	5.04468	5.11961	5.18623	5.30106	5.234	5.12106	5.27133	5.01229	5.25031	5.00955	5.14069	5.37586	5.1367	5.15384	4.88515	5.17455	5.23391	5.12402	5.21129	5.07792	5.13508	5.26547	5.36598	5.16111	5.33491	5.17324	5.25027	NA	NA	NA	NA	NA	NA	NA	NA	NA
1623445_at	CG14095	5	7.07876	7.09328	7.90038	6.98244	7.17903	7.13915	7.24988	7.23329	7.21295	7.33647	7.12383	7.36476	7.15955	7.38747	6.93209	7.17159	7.07148	7.22495	7.51967	7.19513	7.26369	7.3677	7.40143	6.79934	6.99285	6.96082	7.11051	7.34547	6.97476	7.20809	7.19844	7.14137	7.32119	7.31033	7.21948	7.57669	NA	NA	NA	NA	NA	NA	NA	NA	NA
1623446_a_at	CG14245 /// CG14246	5	4.65558	4.92657	4.81901	5.18536	5.21093	4.80873	4.92152	4.78839	4.95807	4.86972	4.83641	4.78425	5.00706	4.88818	5.18511	5.04498	4.73759	4.97431	4.88135	4.95165	4.47472	4.6473	4.68322	4.78521	4.98382	5.18739	4.68039	4.56223	5.0769	4.87612	4.96081	4.71413	4.65799	4.79907	4.57354	4.45148	NA	NA	NA	NA	NA	NA	NA	NA	NA
1623447_a_at	CG12201	5	3.81549	3.76997	3.70422	3.72618	3.70447	3.9956	3.94254	3.62658	3.82865	3.93868	3.88453	4.07974	3.92476	3.84559	3.91261	3.97514	3.97013	3.73842	3.63747	3.89421	4.06754	4.03609	3.63023	3.95163	3.97929	3.64196	3.89723	3.97927	3.77549	3.781	3.58215	3.8232	3.85688	3.71767	3.92768	3.8831	NA	NA	NA	NA	NA	NA	NA	NA	NA
1623448_at	CG5196	5	9.50996	9.47367	9.45747	9.45802	9.46326	9.42229	9.53035	9.44095	9.5636	9.53716	9.5018	9.57886	9.35111	9.59548	9.37716	9.47832	9.71747	9.47036	9.5674	9.38902	9.50152	9.52562	9.40078	9.65493	9.46543	9.37882	9.63171	9.61112	9.60437	9.65574	9.59975	9.59432	9.5311	9.54319	9.61252	9.44137	NA	NA	NA	NA	NA	NA	NA	NA	NA
1623449_at	CG7840	5	11.2948	10.3274	10.3009	10.2682	10.7306	10.1064	10.8542	10.8189	11.1065	10.9526	11.229	11.0615	11.1325	10.8431	10.5538	9.99115	11.2587	10.1921	10.6288	10.138	10.8424	10.9109	10.8331	10.6672	10.7096	10.1936	11.3639	11.6344	10.6251	10.747	10.681	10.8856	10.9574	11.253	11.0915	11.0459	0.428716	0.431064	-0.0882837	0.30167	0.384646	0.178067	0.186494	0.334853	0.26635
1623450_at	Gr59e	5	3.96514	3.55263	3.75026	3.69019	4.04091	3.71122	3.85065	3.97896	3.81906	3.98497	3.93997	3.978	3.85473	3.85991	3.61499	3.79499	3.63928	3.66054	3.75503	3.72546	3.85112	3.84743	3.88555	3.68433	3.90565	3.80339	3.73874	3.94716	3.85915	3.83239	3.69337	3.79687	3.8477	3.87064	3.8678	3.98111	NA	NA	NA	NA	NA	NA	NA	NA	NA
1623451_at	Ank2	5	5.88149	5.93974	6.02956	5.90856	6.12382	6.04075	6.02754	5.79768	5.87965	5.74133	5.6752	5.98863	5.93248	5.95472	5.93767	6.00057	5.92215	5.59401	5.8136	5.75909	6.30368	5.88038	5.98753	5.77623	6.02128	5.87567	5.74125	6.01993	5.8777	5.68704	5.61379	5.83325	6.07499	5.96061	6.16002	5.87147	NA	NA	NA	NA	NA	NA	NA	NA	NA
1623452_at	CG13068	5	8.54319	8.58165	8.77279	8.34057	8.57996	8.36742	8.50085	8.43507	8.71719	8.51554	8.4647	8.49695	8.26648	8.50132	8.36723	8.89132	8.50994	8.38734	8.58328	8.48279	8.65195	8.689	8.65724	8.24785	8.38474	8.32543	8.47694	8.69441	8.36223	8.46125	8.56702	8.5358	8.68372	8.49206	8.89785	8.87289	0.928502	0.585403	-0.00667661	0.622981	0.496611	0.036538	0.53198	0.46609	0.0432146
1623453_at	Nf-YB	5	9.03461	8.99879	8.99976	9.29102	9.01663	9.06512	9.05724	8.99137	8.90765	9.06269	9.01744	9.10412	9.12949	9.04068	9.3151	9.05709	9.16558	9.29164	9.19995	9.2672	9.08379	9.11887	8.97892	9.18495	9.09616	9.24355	9.32085	9.20721	9.20623	9.08555	8.97775	8.97501	9.17619	9.1894	8.8322	9.06191	0.028486	0.148755	0.107236	0.166252	0.323653	0.0687984	0.418598	0.427572	-0.038438
1623454_at	---	5	3.52966	3.40855	3.31385	3.29024	3.62084	3.39563	3.37487	3.3168	3.38711	3.41232	3.42313	3.45642	3.39215	3.47938	3.19672	3.50569	3.51863	3.53962	3.37679	3.41277	3.45982	3.44372	3.4181	3.2046	3.22134	3.23579	3.36473	3.574	3.39348	3.52221	3.49652	3.70799	3.31746	3.43655	3.72494	3.394	NA	NA	NA	NA	NA	NA	NA	NA	NA
1623455_s_at	Imp	5	9.48909	9.41401	9.10795	9.33365	9.4633	9.29612	9.45239	9.5964	9.57636	9.55462	9.72691	9.55947	9.63307	9.22765	9.38406	9.04553	9.69642	9.27605	9.38313	9.03524	9.4307	9.58645	9.46966	9.43594	9.61266	9.40344	9.65238	9.77126	9.57548	9.49964	9.37152	9.47237	9.61583	9.76128	9.34022	9.30886	0.262974	0.368967	-0.0805293	0.396176	0.419167	0.0678915	0.0695164	0.231743	0.148421
1623456_at	CG12477	5	4.58263	4.53298	4.72021	4.2249	4.76693	4.14997	4.44636	4.37787	4.5511	4.20239	4.28983	4.26346	4.47507	4.61529	4.2465	4.39855	4.15284	4.15322	4.14167	4.51179	4.593	4.32399	4.44851	4.26149	4.17663	4.42046	4.47409	4.703	4.40155	4.29393	4.24187	4.32492	4.59669	4.43671	4.4776	4.09421	NA	NA	NA	NA	NA	NA	NA	NA	NA
1623457_at	---	5	3.92633	3.90108	3.99408	3.92449	3.92496	4.03338	3.85532	3.77953	3.85473	3.84525	3.96192	3.88834	4.02472	3.99525	3.74023	4.00047	3.79399	3.94805	3.93855	4.07761	4.05411	3.98296	4.05529	3.85816	3.86196	4.07345	3.73436	4.24011	3.89819	3.83435	4.0541	3.82647	3.97063	3.97361	4.14504	3.95071	NA	NA	NA	NA	NA	NA	NA	NA	NA
1623458_at	CG14899 /// DbuzCG14899	5	9.72706	9.60336	9.59317	9.73218	9.70991	9.72709	9.75502	9.76385	9.81101	9.81201	9.70782	9.79039	9.68025	9.79555	9.71076	9.67445	9.77979	9.70825	9.73912	9.65945	9.74845	9.75151	9.71941	9.75746	9.65936	9.59865	9.8156	9.87341	9.65163	9.69087	9.69926	9.70095	9.79213	9.782	9.74708	9.84886	0.97801	0.597603	-0.000700503	0.69425	0.517802	0.0105779	0.715749	0.524257	0.0112784
1623459_at	Spn4	5	9.96968	10.3184	10.2634	10.4434	10.2521	10.6153	10.3004	10.2092	10.0386	9.93909	9.8877	10.6697	10.3372	10.268	10.2063	10.3173	10.2141	10.3979	10.2761	10.3312	10.3747	10.4164	9.89936	10.9576	10.3715	10.1805	10.0166	9.78214	10.2858	10.2292	10.2612	10.1513	10.0227	10.0072	10.2711	10.1599	0.185782	0.334645	0.0907658	0.315785	0.389729	-0.0973329	0.0575183	0.212237	-0.188099
1623460_at	Aats-leu	5	8.50597	8.08272	8.14793	8.07698	8.11922	8.09914	8.40188	8.24665	8.35446	8.39426	8.5382	8.38965	8.40885	8.20503	8.11855	8.00916	8.60728	8.22804	8.25971	8.12622	8.22409	8.45832	8.31203	8.58826	8.32298	8.25238	8.54829	8.57334	8.17864	8.30131	8.28835	8.39885	8.30401	8.4225	8.46389	8.19569	0.787832	0.547225	0.0157057	0.264697	0.369827	0.0744293	0.49649	0.453284	0.0587236
1623461_at	CG40239	5	4.00378	4.24178	3.74595	3.57876	3.67539	3.76288	3.84423	3.9504	4.02398	3.74121	3.93996	4.04347	3.69391	4.29394	3.73181	4.00215	3.89768	3.78245	3.7845	3.89153	3.95859	4.08632	3.77567	3.64703	3.69769	3.66838	3.92464	3.7136	3.71364	3.73129	4.21076	4.16285	3.93088	3.72906	4.05648	3.85531	NA	NA	NA	NA	NA	NA	NA	NA	NA
1623462_at	cato	5	4.11342	4.22954	4.56053	3.91882	4.20336	3.96887	4.30616	4.16648	4.19462	3.87049	4.00571	4.2951	4.17591	4.59048	4.0007	4.0562	4.12378	4.18198	4.04231	4.22078	4.2488	4.12164	4.22989	3.85433	4.01272	4.09494	4.2379	4.31183	4.12318	3.96919	4.09775	4.23157	4.22569	4.08413	4.18449	4.40359	NA	NA	NA	NA	NA	NA	NA	NA	NA
1623463_at	tsr	5	13.8697	13.5847	13.7182	13.7947	13.8288	13.7297	13.9785	13.928	13.9938	13.8733	13.9397	14.0273	13.8233	13.8326	13.682	13.6754	14.0122	13.7082	13.836	13.667	13.8366	13.9353	13.8381	14.0311	13.7839	13.6441	13.9497	13.987	13.8658	13.8296	13.7801	13.8722	13.8507	13.9092	13.9165	13.9929	0.45222	0.438701	-0.0323854	0.798432	0.550535	0.00959867	0.377089	0.41186	0.041984
1623464_at	CG13217	5	4.49808	4.33214	5.43502	4.17463	4.60399	4.36921	4.48257	4.29722	4.32466	4.27201	4.51006	4.5487	4.42458	4.43585	4.27873	4.64894	4.37323	4.20137	5.68046	4.48683	4.58782	4.4894	4.71608	4.29998	4.2766	4.22513	4.3182	4.76204	4.29406	4.29917	4.50495	4.70695	4.47401	4.57619	4.62384	4.65474	0.690831	0.516859	0.0645828	0.931205	0.585927	-0.0110334	0.508102	0.457016	-0.0756162
1623465_at	CG6138	5	3.17298	3.05964	3.4111	3.0892	2.94464	3.02133	3.18839	3.16721	3.13805	2.90899	3.09859	3.25932	3.07746	3.11963	3.11621	3.07436	2.93481	3.0298	2.90459	2.97792	3.08948	3.11365	3.10299	3.00563	3.13717	3.03112	2.99183	3.41473	3.01415	3.2087	2.93968	3.42651	2.99243	2.89396	3.08356	3.339	NA	NA	NA	NA	NA	NA	NA	NA	NA
1623466_at	bab1	5	5.62804	5.97014	5.86541	5.86376	5.27483	5.87607	4.97165	5.4234	5.26493	5.45508	5.40547	5.38717	5.65	5.54045	5.97986	5.86173	5.16261	5.87899	5.54505	5.61639	5.52893	5.32501	5.31115	5.60113	5.54057	5.81031	5.20188	5.25154	5.52165	5.72425	5.6575	5.46113	5.20964	5.34478	5.38315	5.31575	0.491879	0.452106	0.0512786	0.443473	0.435717	-0.0803151	0.200592	0.341369	-0.131594
1623467_at	CG8087	5	4.04489	4.1433	4.08958	3.92219	3.98877	4.29478	4.30297	3.91983	4.30394	3.92971	3.9981	4.12133	4.07058	4.32812	3.87183	4.23798	3.98158	4.09483	3.98726	3.9212	3.81553	4.04027	4.29575	3.99306	4.04499	3.86761	4.1366	4.07172	4.16833	3.8516	4.14842	4.04043	3.99434	3.83793	4.14153	4.4726	NA	NA	NA	NA	NA	NA	NA	NA	NA
1623468_at	msd5	5	8.50035	7.44551	7.73753	7.81444	8.14369	7.63104	8.2947	8.0676	8.28286	8.45474	8.56238	8.23603	8.42533	8.10422	7.89474	7.49011	8.67744	7.61354	8.27764	7.55061	8.10791	8.4653	8.26519	8.20338	7.9935	7.72436	8.66371	9.02393	8.15542	8.12228	8.04315	8.14338	8.31219	8.50115	8.15926	8.38837	0.936101	0.586958	-0.00795488	0.263507	0.369328	0.171654	0.319293	0.390991	0.179608
1623469_s_at	Muc68Ca	5	3.69791	4.06408	3.77743	4.00301	3.96555	3.83206	3.93256	3.69295	3.91529	3.73703	3.78428	3.77244	3.72665	3.70768	3.77923	3.71182	3.79357	3.60775	3.65713	3.9357	3.93569	3.80505	3.99619	3.79809	4.04678	3.74556	3.86369	3.6344	3.76184	3.86412	3.783	3.8301	4.17799	4.21504	3.97372	3.72859	NA	NA	NA	NA	NA	NA	NA	NA	NA
1623470_at	Las	5	10.27	10.7646	10.7794	10.4916	10.344	10.3942	10.152	10.2478	10.1041	10.2554	10.1354	10.1995	10.4391	10.5663	10.6919	10.4947	10.0827	10.73	10.473	10.6848	10.295	10.3692	10.3646	10.4095	10.3875	10.8516	10.2831	10.0612	10.5009	10.4924	10.5008	10.4471	10.2803	10.3847	10.3091	10.3695	0.0777564	0.243576	0.121884	0.424748	0.430016	0.060838	0.415873	0.426773	-0.0610455
1623471_s_at	---	5	8.52832	8.51158	8.12411	9.67906	9.47302	9.46697	9.50434	9.62233	8.96689	9.47164	9.5772	9.39458	9.263	7.95265	9.44299	8.90216	9.13496	9.28223	9.28746	9.2328	9.39819	9.29967	9.4658	9.18286	9.27265	9.46042	9.31863	9.24191	9.55464	9.17282	8.69813	8.63475	9.35497	9.41949	8.35517	8.79931	0.819637	0.556284	-0.0396043	0.708615	0.522497	-0.0864275	0.807955	0.553036	-0.0468232
1623472_at	wus	5	8.13914	7.08332	7.31124	7.06233	7.52627	6.67133	7.61367	7.5107	7.95112	7.86302	7.99379	7.65758	7.86249	7.72677	7.21723	6.59032	8.04232	6.86062	7.37146	6.77729	7.34409	7.70553	7.51917	7.48309	7.3339	6.99744	8.02034	8.37968	7.3274	7.60621	7.53943	7.57343	7.68365	7.87148	7.82301	7.46108	0.225822	0.353856	-0.156927	0.55841	0.475463	0.102795	0.241629	0.361339	0.259722
1623473_at	shark	5	9.41004	8.98547	8.67676	8.9102	9.07109	8.88391	9.33972	9.04619	9.17126	9.49018	9.57893	9.2402	9.37191	9.03738	9.10208	8.54005	9.50433	8.85125	9.14635	8.75662	9.04059	9.28621	9.22988	9.15964	9.26964	8.8681	9.44408	9.60245	9.06895	9.0521	9.08484	9.16232	9.39967	9.42404	9.21903	8.89835	0.413856	0.426011	-0.0648049	0.597108	0.488069	0.0574672	0.307037	0.3864	0.122272
1623474_at	CG15479	5	4.64447	4.87596	4.65908	4.59778	4.6899	4.59915	4.76483	4.60991	4.60993	4.78891	4.59907	4.76018	4.49778	4.3559	4.62729	4.88276	4.79436	4.593	4.74832	4.65106	4.73926	4.57743	4.94368	4.56098	4.67839	4.5809	4.60485	4.76251	4.63178	4.35199	4.71255	4.92954	4.65468	4.64623	4.58501	5.10245	NA	NA	NA	NA	NA	NA	NA	NA	NA
1623475_s_at	Rm62	5	12.7495	12.5519	12.4724	12.5205	12.5706	12.3328	12.8025	12.6958	12.7304	12.7984	12.8842	12.7884	12.9169	12.6597	12.6405	12.3663	12.7903	12.4447	12.5139	12.3726	12.5949	12.7265	12.6604	12.636	12.6509	12.4124	12.8354	12.9758	12.6292	12.6422	12.7892	12.7106	12.8091	13.0071	12.8682	12.4575	0.408175	0.423617	-0.0478973	0.279529	0.376275	0.074171	0.149102	0.312886	0.122068
1623476_at	---	5	3.746	3.82722	3.88684	3.6803	3.73594	3.70668	3.811	3.89078	3.92365	3.72866	3.9153	3.97087	3.74555	3.98685	3.86879	3.97309	3.71647	3.80929	3.85384	3.64189	3.87564	3.78569	3.84328	3.64051	3.89593	3.74381	3.61315	3.90919	3.74709	3.92463	4.01608	4.01946	4.02934	3.97696	4.06148	4.11199	NA	NA	NA	NA	NA	NA	NA	NA	NA
1623477_at	---	5	5.49653	6.4781	6.97325	4.63116	5.92093	5.22188	5.11059	4.81145	6.27493	6.85492	6.59965	5.38725	4.06528	5.71306	4.07907	4.34338	6.87778	4.74449	5.3227	4.32457	4.93696	4.07759	5.52381	5.84014	4.29062	4.95705	5.95508	5.52585	4.00042	4.88725	4.74429	5.44731	4.76945	6.31629	6.0775	4.86491	0.0331574	0.160908	-0.825984	0.020129	0.12259	-0.660385	0.688787	0.516221	0.165599
1623478_at	SPR	5	8.33207	8.98094	8.56606	8.9529	7.94133	8.4188	8.25408	8.28465	6.85494	8.5309	8.01679	8.14105	9.03181	8.34523	9.23326	8.59015	8.99795	8.31429	8.51228	9.06298	7.31801	8.40085	8.33504	8.5593	8.53169	9.09352	8.00433	8.2144	8.25652	7.87511	8.36065	8.41887	7.38041	8.05689	7.70743	7.71024	0.0757076	0.240659	0.285553	0.270815	0.371604	-0.138704	0.013068	0.0968354	-0.424256
1623479_at	Rbf	5	8.7743	8.04378	8.10856	8.26861	8.48366	8.13459	8.50119	8.62094	8.51578	8.8958	9.07572	8.84541	8.78732	8.39349	8.47274	7.97222	9.03219	8.11472	8.35678	8.2039	8.60286	8.64294	8.67179	8.55626	8.47992	8.3217	8.9951	9.14799	8.47744	8.46199	8.42871	8.54235	8.6818	9.01904	8.71525	8.63423	0.687129	0.515822	-0.0384276	0.27182	0.37207	0.136432	0.192293	0.337551	0.17486
1623480_at	mTerf3	5	8.41654	8.56288	8.35961	8.18059	8.14049	8.44163	8.43832	8.37679	8.41883	8.36825	8.38717	8.26408	8.31488	8.29758	8.32769	8.23586	8.30253	8.63519	8.59776	8.32463	8.45191	8.51591	8.40712	8.49888	8.41892	8.43618	8.38844	8.36725	8.30958	8.53849	8.4748	8.50482	8.27755	8.39862	8.40166	8.59234	NA	NA	NA	NA	NA	NA	NA	NA	NA
1623481_at	MSBP	5	11.4723	11.5172	11.5059	11.6742	11.4937	11.5598	11.5042	11.5518	11.5534	11.545	11.5008	11.5396	11.4761	11.4448	11.6444	11.5948	11.6367	11.6768	11.4645	11.6036	11.5313	11.6359	11.5226	11.5615	11.5531	11.6024	11.5228	11.654	11.6385	11.5128	11.5022	11.537	11.5264	11.5666	11.4725	11.2817	0.19307	0.338166	0.0312734	0.890736	0.575332	-0.00398756	0.321863	0.391894	-0.035261
1623482_at	CG9072	5	3.70463	3.64247	3.72118	3.87518	3.98588	3.7559	3.56321	3.78471	3.66248	3.70027	3.83582	4.07996	3.64033	3.66896	3.56853	3.57961	3.55726	3.67581	3.72085	3.82853	3.63607	3.50163	3.57931	3.67218	3.74347	3.53558	3.72402	3.8246	3.95285	3.61884	3.52356	3.66828	3.97789	3.67207	3.58535	4.10438	NA	NA	NA	NA	NA	NA	NA	NA	NA
1623483_at	CG17283	5	4.1366	3.90582	4.19591	3.79549	4.39317	4.26625	3.9476	4.03101	4.36962	3.8697	4.10263	3.92864	4.10467	4.09952	3.90375	3.68708	3.9446	3.86567	3.77212	3.92208	3.99048	3.81865	4.11419	3.86902	4.18376	4.22507	4.17646	3.87246	3.81159	3.94491	4.06196	4.03349	3.94741	4.0616	4.19787	3.91417	NA	NA	NA	NA	NA	NA	NA	NA	NA
1623484_at	vg	5	5.2483	5.86831	5.83584	5.99967	5.18437	5.54538	4.96766	5.44758	4.7493	5.25986	4.88107	5.39756	5.45119	5.25553	6.21839	5.66773	5.04567	6.01291	5.63521	5.92249	5.20923	5.4425	5.47351	5.78149	5.35617	6.24651	5.17959	4.59558	5.75965	5.52272	5.69886	5.41872	5.10054	5.09518	5.25411	4.86525	0.0704339	0.232875	0.22758	0.89122	0.575428	-0.0243326	0.199071	0.340794	-0.251913
1623485_at	Xpac	5	8.12434	7.59116	7.56308	7.82001	7.88134	7.65658	7.85381	7.71397	7.90716	7.81033	8.07429	7.92743	7.96541	7.79107	7.72811	7.63576	8.09912	7.6627	7.95823	7.73513	7.80082	8.01084	7.86204	7.84275	7.59946	7.7168	7.98878	8.27601	7.89225	7.87185	7.60201	7.81582	7.82908	8.08703	7.7728	7.72668	0.768803	0.541312	0.0140394	0.812397	0.55427	0.021256	0.930554	0.585794	0.00721655
1623486_at	CG7900	5	6.46353	8.36325	7.57436	8.23402	7.94377	7.9328	7.7337	7.54938	6.5161	7.91043	7.23717	7.92235	5.9283	8.51374	7.58075	6.94031	7.63116	5.89722	7.60551	6.68315	7.68093	5.46213	7.63379	7.14693	8.14257	6.13664	7.67649	6.72521	7.5019	6.92238	7.10948	6.29438	7.41264	7.08996	6.43463	7.21982	0.0847269	0.252051	-0.556411	0.091643	0.260206	-0.559561	0.992993	0.600537	-0.00315082
1623487_at	dmt	5	9.56823	8.81065	8.60123	9.10799	9.37722	8.75038	9.43367	9.35317	9.49007	9.97293	9.99722	9.68682	9.614	8.93223	9.25807	8.36229	9.96681	9.02352	9.30397	8.82857	9.24603	9.74491	9.55814	9.52659	9.41674	9.00586	9.90404	10.1159	9.31196	9.33621	9.3162	9.31687	9.75847	9.89185	9.39165	9.1826	0.605691	0.49046	-0.0653701	0.381373	0.41349	0.149898	0.251539	0.365166	0.215268
1623488_at	CG40164	5	3.07494	3.0259	2.98627	2.91431	2.76107	2.84379	3.02883	3.02018	2.93952	2.78017	3.00952	2.82177	2.84763	2.79886	2.75438	3.24783	2.89113	2.79677	2.80271	2.99885	2.79543	2.9632	3.2232	2.93532	3.03188	2.84611	2.88268	2.75095	2.88835	2.86663	3.0217	2.90361	2.79517	2.79788	2.82592	2.81182	NA	NA	NA	NA	NA	NA	NA	NA	NA
1623489_at	---	5	4.91143	4.94631	5.38692	5.15941	5.11894	5.10401	5.17903	5.15067	5.15234	5.27988	5.24407	5.29822	4.92609	5.26706	4.90908	5.19115	5.18387	5.19812	5.25953	5.14886	5.36602	5.08768	5.186	4.93759	5.12939	4.86116	5.0144	5.15913	4.99536	4.87887	4.90491	4.88122	5.06692	5.1707	4.99061	5.2327	NA	NA	NA	NA	NA	NA	NA	NA	NA
1623490_at	Ten-m	5	8.72564	9.35108	9.21659	9.48966	9.09322	9.48381	8.87689	8.9702	8.38023	8.74274	8.83751	9.0696	9.01477	8.83742	9.32213	9.41995	8.66066	9.47921	8.98805	9.55942	8.79174	8.68848	8.88289	9.28013	9.27134	9.34702	8.6891	8.14115	9.41809	8.83862	9.22139	8.99645	8.79058	8.60458	8.35304	8.57961	0.541044	0.469279	0.0573065	0.322436	0.392204	-0.165517	0.221382	0.351944	-0.222823
1623492_a_at	CG17010	5	4.03164	3.99694	3.84558	3.95468	4.27576	4.11303	4.06703	4.04663	4.05988	3.78176	4.02563	4.15857	3.97176	3.884	3.80326	3.83354	4.0325	3.83119	3.99918	3.8934	4.25178	4.01645	4.20336	4.1024	4.0323	3.9461	4.09496	3.99454	3.87546	4.0985	3.94609	3.77312	4.13707	3.96418	4.31061	4.07519	NA	NA	NA	NA	NA	NA	NA	NA	NA
1623493_at	CG12717	5	6.56635	5.27247	5.42718	5.73354	5.75633	5.49056	5.74413	6.02861	5.82193	6.32029	6.24668	5.8786	6.16731	5.81045	5.9821	5.24061	6.19785	5.46283	5.53517	5.80937	5.77225	5.7538	5.68195	5.98955	5.61766	5.50883	6.23749	6.69722	5.90801	6.18012	5.96684	5.79471	6.14015	6.27877	6.18748	5.50018	0.549519	0.472422	-0.0736181	0.370074	0.40915	0.144234	0.219873	0.351153	0.217852
1623494_at	ImpE3	5	5.47586	5.58642	5.18304	5.36964	5.46568	5.45459	5.37555	5.29188	5.57854	5.35501	5.45742	5.05282	5.4369	5.24876	5.37684	5.44749	5.65063	5.43438	5.22281	5.66596	5.32829	5.48847	5.34346	5.25248	5.38985	5.672	5.52091	5.32046	5.41301	5.44975	5.58523	5.41414	5.33148	5.02971	5.59439	5.25633	NA	NA	NA	NA	NA	NA	NA	NA	NA
1623495_at	I-2	5	9.86239	10.0094	10.0159	10.0591	9.91312	10.1422	9.95626	9.95721	10.0266	9.97489	9.933	10.0936	10.032	9.98885	10.0601	10.1538	10.0822	10.1377	10.0189	10.1164	10.0201	10.0329	9.82209	10.2124	10.0692	9.94906	9.96394	9.91431	9.96051	9.99158	9.9217	9.89256	9.98539	9.894	9.87087	9.83488	0.0328751	0.160088	0.0611497	0.101661	0.272511	-0.0579721	0.00575289	0.0587958	-0.119122
1623496_at	kz	5	7.88573	7.65265	7.28736	7.37745	7.73941	7.30469	8.01687	7.65053	7.98966	8.1092	8.13741	7.72186	7.7039	7.72857	7.56077	7.25727	7.99381	7.59768	7.834	7.37457	7.52201	7.98829	7.82817	8.05608	7.62969	7.67626	8.07379	8.06183	7.69406	7.79752	7.58939	7.83991	7.77799	8.01533	7.7599	7.68785	0.65866	0.506909	-0.035642	0.609361	0.49152	0.0608917	0.371905	0.410076	0.0965337
1623497_at	HLHm3	5	9.27678	9.60544	9.0816	9.46011	9.29837	9.50981	9.67483	9.83633	9.5361	9.56286	9.61391	9.44936	9.26851	9.53795	9.39684	9.65358	9.58759	9.52767	9.77116	9.42492	9.41303	9.81797	9.66636	9.60107	9.49742	9.45524	9.27577	9.03622	9.46357	9.46164	9.26347	9.76156	9.52795	9.27473	9.60385	9.33107	0.30644	0.386164	0.0634289	0.229602	0.356078	-0.0794172	0.12662	0.296455	-0.142846
1623498_at	CG5857	5	8.68278	7.89738	8.2017	7.93859	8.20847	7.9978	8.367	8.38797	8.56282	8.42342	8.57271	8.20117	8.2864	8.41277	8.17744	8.15437	8.56222	7.98533	8.1966	7.99528	8.36958	8.40686	8.4476	8.39868	8.17967	8.04437	8.63048	8.81818	8.18232	8.39156	8.26157	8.49565	8.38073	8.54148	8.62241	8.42307	0.96104	0.593332	-0.00405818	0.227771	0.355034	0.127471	0.194923	0.3388	0.13153
1623499_at	CG12341	5	7.92589	7.87171	8.00327	7.76709	7.84022	7.9155	7.87414	7.78062	8.01895	7.74788	7.8884	7.86049	7.81457	7.97979	7.82542	7.88834	7.90913	8.01678	7.90925	7.88161	7.96516	7.81862	7.86257	7.94217	7.80172	7.96278	7.85953	7.87768	7.86478	7.90099	7.82647	7.7839	7.69001	7.80903	7.94586	8.14126	NA	NA	NA	NA	NA	NA	NA	NA	NA
1623500_at	CG13622	5	4.60376	4.92138	4.60844	4.74128	4.79312	4.65847	4.94607	4.96847	4.69429	4.94517	4.84115	4.79047	4.95844	4.89569	4.7417	4.79342	4.65142	4.96635	4.90066	4.8681	4.88268	4.84719	5.06798	4.68342	4.7185	4.80252	4.72296	4.99714	4.87012	4.92911	4.90874	4.85894	4.89036	4.919	4.83392	4.99874	NA	NA	NA	NA	NA	NA	NA	NA	NA
1623501_at	eIF4E-7	5	3.37858	3.67429	3.3957	3.04902	3.40496	3.30492	3.47687	3.71595	3.43869	3.37525	3.43916	3.33713	3.51533	3.42564	3.26795	3.63344	3.28318	3.52235	3.28076	3.43111	3.5427	3.34422	3.43949	3.44877	3.2796	3.29139	3.2884	3.42308	3.40527	3.55477	3.25703	3.53542	3.28353	3.43793	3.4465	3.68562	NA	NA	NA	NA	NA	NA	NA	NA	NA
1623502_at	CG31910	5	4.79094	4.59681	4.79296	4.5226	5.00979	4.8253	5.03643	4.57004	4.93843	4.94475	4.80086	4.85129	5.05053	4.55803	4.50328	4.77724	4.69212	4.68334	4.619	4.76692	5.08558	5.32616	4.87981	4.78508	4.79294	4.36761	4.80934	4.86286	4.69042	4.74169	4.86539	4.63881	4.75957	4.83315	4.81515	4.9708	NA	NA	NA	NA	NA	NA	NA	NA	NA
1623503_at	sda	5	9.46194	9.73616	10.0915	10.2116	9.71088	10.4307	9.70189	9.97421	9.53767	9.42857	9.51669	10.0866	9.80278	9.77455	10.1465	9.99161	9.62044	10.1267	9.87266	10.0217	9.78634	9.55362	9.72159	10.4719	10.0898	10.0405	9.74633	9.37635	9.98781	9.64328	9.75997	9.81658	9.72891	9.47036	9.59358	9.85525	0.195826	0.339297	0.0835113	0.614614	0.493622	-0.0649749	0.156411	0.318048	-0.148486
1623504_at	---	5	4.21493	4.3515	4.36343	4.10831	4.06097	4.30094	4.24664	4.16559	4.40582	4.06523	4.12645	4.02619	4.23967	4.38445	3.97564	3.95609	3.95127	4.38264	4.14066	4.10211	4.15112	3.99992	4.53266	3.93027	4.25202	4.03838	4.32494	4.18875	4.0544	4.24194	4.4062	4.23388	4.01252	4.20634	4.26425	4.17286	NA	NA	NA	NA	NA	NA	NA	NA	NA
1623505_s_at	Ubi-p5E	5	13.4639	13.0876	13.3802	13.3016	13.2832	13.2287	13.2194	13.3869	13.3671	13.0535	13.2842	13.4353	13.326	13.2318	13.3176	13.1399	13.26	13.1271	12.8924	13.0224	13.3676	13.1209	13.0475	13.1583	13.2557	13.3165	13.2452	13.4976	13.3485	13.4219	13.3834	13.2643	13.3537	13.3494	13.3938	12.9785	0.0206215	0.124408	-0.123332	0.686505	0.515625	0.0264102	0.0297376	0.152156	0.149742
1623506_s_at	Pp4-19C	5	9.52579	8.93607	9.11564	9.29234	9.24295	9.08181	9.23507	9.25778	9.33194	9.42137	9.51817	9.46253	9.44972	9.36977	9.33304	8.98479	9.7215	8.98174	9.07932	9.01879	9.23723	9.35896	9.23795	9.32263	9.18435	9.04094	9.61751	9.79823	9.30334	9.21587	9.27802	9.26548	9.3937	9.67277	9.5142	9.00045	0.726771	0.528173	-0.0271692	0.396373	0.419256	0.0719478	0.36243	0.4068	0.099117
1623507_at	CG33136	5	3.60143	3.50084	3.54519	3.36616	3.51787	3.76103	3.50035	3.64626	3.66378	3.42669	3.46646	3.92757	3.47708	3.98333	3.4179	3.58283	3.5238	3.64846	3.59147	3.65264	3.52879	3.71757	3.55022	3.59162	3.67988	3.47252	3.52461	3.47096	3.49713	3.52083	3.61013	3.62895	3.37493	3.52596	3.69137	3.59033	NA	NA	NA	NA	NA	NA	NA	NA	NA
1623508_at	CG30466	5	6.94637	7.11304	7.04389	7.30283	6.9317	7.01319	6.80647	7.00107	7.06361	6.81641	6.81329	6.96304	6.75912	6.97307	7.03809	7.33812	6.84053	7.07057	6.74084	7.13605	6.62916	6.70023	6.41001	7.01554	6.98221	7.12907	6.95514	6.81994	7.07923	7.17142	6.87111	6.81233	6.699	6.54452	7.09817	5.56377	0.0843706	0.251937	-0.0969665	0.205723	0.343981	-0.174083	0.623482	0.49678	-0.0771161
1623509_at	CG15252	5	4.84552	4.94925	5.17728	4.75812	4.91254	5.00102	5.24122	4.77459	5.0118	4.94318	4.91913	5.04232	5.16472	5.03444	4.78313	5.11849	5.08004	4.99999	4.97832	5.15712	4.99703	5.19158	5.04064	4.93186	4.89657	5.09522	4.9054	4.60079	5.01686	4.95723	5.00233	4.83475	5.04612	5.08954	5.10596	5.12246	NA	NA	NA	NA	NA	NA	NA	NA	NA
1623510_at	CG7970	5	11.8204	11.6718	11.6491	11.6762	11.8318	11.762	11.9317	11.8329	12.0523	11.8063	11.8472	11.7448	11.5535	11.7852	11.5731	11.7659	11.7987	11.7492	11.7922	11.6992	11.904	11.9124	11.8641	11.8412	11.6231	11.7343	11.6982	11.6545	11.662	11.8848	11.833	11.8503	11.8232	11.7293	11.8888	11.8711	0.382794	0.413967	-0.0323158	0.395664	0.419115	-0.0311593	0.972166	0.596115	0.00115648
1623511_at	---	5	3.73458	3.71537	3.85665	3.60968	4.00045	3.71275	3.82329	3.82412	3.94911	3.73601	3.65271	4.05823	3.7323	3.98824	3.67781	4.23157	3.67688	3.66974	3.77208	3.7972	3.92598	3.99594	3.80347	3.82229	3.72653	3.62559	3.73836	3.5273	4.08852	3.58068	3.72521	3.76116	3.83617	3.88206	3.94083	3.84517	NA	NA	NA	NA	NA	NA	NA	NA	NA
1623512_at	---	5	3.48076	3.50536	3.33701	3.43162	3.70955	3.33596	3.49384	3.8145	3.71049	3.69384	3.55073	3.47803	3.44542	3.50384	3.58781	3.45189	3.30049	3.47497	3.7182	3.49966	3.33638	3.59892	3.52781	3.58621	3.52146	3.37117	3.62182	3.4568	3.61814	3.71293	3.5011	3.46398	3.51905	3.47692	3.44366	3.50551	NA	NA	NA	NA	NA	NA	NA	NA	NA
1623513_at	Upf1	5	9.2456	9.18699	9.01745	8.90333	9.0766	8.96563	9.14984	9.10013	9.26727	9.05738	9.21284	9.0477	9.10379	9.08759	8.98664	8.85595	9.13195	8.85979	8.97255	8.83789	8.98417	9.02541	9.12711	9.08298	9.11793	9.09444	9.2125	9.17479	8.9985	9.18471	9.0877	9.16857	9.00422	9.15152	9.18094	9.2003	0.00822178	0.0730869	-0.0979114	0.552816	0.473466	0.0287795	0.0126154	0.0948851	0.126691
1623514_a_at	jdp	5	8.64072	9.09578	9.37803	9.17168	8.62469	9.17542	8.23439	8.86684	8.54471	8.16394	8.12648	8.57282	8.5448	8.78556	8.97006	9.23621	7.95128	8.99685	8.44918	8.90153	8.7198	8.3108	8.39137	8.27837	8.80197	9.113	8.09008	7.85052	8.81834	8.96526	8.56649	8.4107	8.11389	8.14621	8.48905	8.68294	0.313888	0.389126	-0.0883105	0.226264	0.354007	-0.212258	0.504443	0.456038	-0.123947
1623515_at	---	5	4.03951	3.85936	3.91037	3.6587	3.92631	3.76963	3.94257	3.97385	4.05679	3.84718	3.87873	3.88434	3.50132	4.05637	3.74502	3.81867	3.85512	3.66075	3.70669	3.79172	3.86302	4.1442	3.86596	3.65101	3.80092	3.83053	3.75963	3.82241	3.6851	3.85128	3.81141	4.01635	3.95837	3.85183	3.82729	3.91941	NA	NA	NA	NA	NA	NA	NA	NA	NA
1623517_at	CG4962 /// DmauCG4962 /// DsimCG4962	5	6.75916	7.54621	7.52583	7.53941	7.6171	7.98881	6.48039	7.40659	7.61346	6.92834	7.06082	6.50598	7.1959	6.07632	7.27216	7.9542	6.86017	8.72157	7.32658	8.16448	7.93975	7.22397	7.18335	7.06785	7.08903	7.41871	6.60686	6.11113	7.89366	7.52131	6.40878	6.80016	7.24209	5.95886	6.43075	6.33854	0.414635	0.426229	0.167851	0.0154281	0.105762	-0.429351	0.050525	0.199999	-0.597202
1623519_at	esc	5	8.78663	7.68749	7.76	7.71102	8.36945	7.21756	8.28283	8.21636	8.54407	8.64692	8.90932	8.63794	8.67163	8.46699	8.23153	7.22467	8.98462	7.49502	8.13649	7.53393	8.1425	8.62522	8.30739	8.23203	8.0996	7.73111	9.11025	9.28777	8.17015	8.18583	8.20404	8.48285	8.57022	8.90826	8.66877	8.40653	0.682148	0.51425	-0.0597979	0.227526	0.354884	0.254648	0.204697	0.343603	0.314446
1623520_a_at	CG10336	5	7.86164	6.70896	6.58337	6.80146	7.34804	6.61458	7.29283	7.38433	7.41281	7.68062	7.91851	7.64582	7.6038	7.36912	7.32972	6.10555	8.09251	6.62702	7.23715	6.62221	7.23307	7.64236	7.34759	7.16261	7.18207	6.73032	7.90746	8.27385	7.28223	7.23061	7.20347	7.54616	7.6315	8.00946	7.78949	7.60627	0.647283	0.503937	-0.0733564	0.168251	0.324655	0.26166	0.168996	0.324983	0.335016
1623522_at	CG11668	5	6.79521	7.28729	7.18686	7.174	6.64447	6.97019	6.70303	6.93026	6.43779	6.6421	6.53382	6.73631	6.78314	6.99834	7.1038	7.43596	6.11054	7.14571	7.07551	7.26203	6.59298	6.5439	6.77564	7.03824	6.84814	7.14251	6.63222	6.19851	7.01091	6.69839	7.06806	6.69388	6.68579	6.68269	6.59872	6.79913	0.410305	0.424476	0.0687068	0.482076	0.449869	-0.081864	0.335995	0.397716	-0.150571
1623523_at	CG5810	5	3.17167	3.42705	3.46395	3.76079	3.3983	3.39783	3.40311	3.44285	3.51133	3.30644	3.32964	3.38555	3.54371	3.23792	3.31575	3.44347	3.48113	3.34327	3.27744	3.60389	3.44381	3.30585	3.59062	3.40907	3.37659	3.30455	3.45504	3.45724	3.38546	3.67018	3.32558	3.36427	3.41684	3.27059	3.37198	3.26978	NA	NA	NA	NA	NA	NA	NA	NA	NA
1623524_at	CG7031	5	4.04227	4.05305	4.21486	3.67734	3.83077	3.81277	3.97551	3.91336	3.76225	4.03008	3.89695	3.96015	3.92309	3.72124	3.67119	3.83288	3.73233	3.94668	3.72653	4.1324	4.24856	3.78778	3.93857	3.80734	3.93292	3.81417	4.09987	3.94148	3.98278	3.91663	3.93863	4.04716	3.55556	3.91897	3.91905	3.98741	NA	NA	NA	NA	NA	NA	NA	NA	NA
1623525_at	Pcl	5	9.15542	8.54949	8.56366	8.54908	8.82543	8.34885	8.92913	8.8096	9.08465	9.0787	9.21778	8.87467	9.05075	8.8415	8.62633	8.10563	9.1691	8.29376	8.70347	8.36266	8.82367	8.88703	8.91884	8.69534	8.79196	8.52908	9.15449	9.44903	8.69515	8.83447	8.71435	8.86833	8.917	9.04791	8.83101	8.77866	0.1135	0.283149	-0.125699	0.659745	0.507257	0.0520823	0.23896	0.360239	0.177781
1623526_at	CG32511	5	4.0788	4.02957	4.14668	3.95163	4.1941	4.1068	4.00497	4.19568	3.94946	3.86459	4.21016	4.23737	3.73281	4.36744	3.76718	4.20234	4.43342	4.05526	3.93597	4.06523	4.00635	4.09395	4.43821	3.93775	3.90951	4.03767	3.98157	3.8006	3.87729	3.9207	4.08954	4.19822	3.99433	4.39738	4.27891	4.38681	NA	NA	NA	NA	NA	NA	NA	NA	NA
1623527_at	CG40122	5	5.49552	5.67845	5.5737	5.38448	5.52095	5.46977	5.51803	5.42146	5.8096	5.35769	5.29268	5.49108	5.42716	5.42914	5.36777	5.58313	5.34535	5.29209	5.33676	5.4963	5.56033	5.58845	5.64383	5.23193	5.46109	5.26654	5.50988	5.39877	5.45418	5.33872	5.4148	5.60226	5.48515	5.48532	5.60378	5.46058	NA	NA	NA	NA	NA	NA	NA	NA	NA
1623528_a_at	CG31784	5	3.28606	3.45495	3.44787	3.41006	3.24819	3.24005	3.09419	3.27016	3.54496	3.22423	3.34286	3.37608	3.19426	3.45529	3.37921	3.30309	3.35195	3.50896	3.15216	3.42465	3.24153	3.52228	3.10451	3.23362	3.07905	3.24945	3.14906	3.42494	3.29469	3.25483	3.42824	3.58444	3.26483	3.32006	3.34669	3.30603	NA	NA	NA	NA	NA	NA	NA	NA	NA
1623529_s_at	Or19a /// Or19b	5	4.49677	4.4521	4.25526	4.45695	4.58587	4.46778	4.15949	4.14631	4.26946	4.46511	4.18879	4.45666	4.3143	4.31874	4.32796	4.47324	4.30819	4.39182	4.63744	4.45787	4.6073	4.72519	4.71872	4.38749	4.30122	4.27558	4.08512	4.39426	4.21954	4.08467	4.37834	4.3392	4.37285	4.46691	4.61568	4.45064	NA	NA	NA	NA	NA	NA	NA	NA	NA
1623530_at	---	5	3.70303	3.67837	3.61386	3.4272	3.64321	3.43063	3.62016	3.6025	3.69498	3.68538	3.50267	3.63018	3.60461	3.56718	3.52475	3.6719	3.35416	3.32615	3.34759	3.65518	3.56484	3.79697	3.69461	3.51864	3.56459	3.70656	3.51435	3.63563	3.45389	3.5535	3.752	3.71036	3.63232	3.40828	3.70545	3.63106	NA	NA	NA	NA	NA	NA	NA	NA	NA
1623531_at	Mst89B	5	3.81137	3.32902	3.51951	3.55556	3.66511	3.61613	3.51907	3.63481	3.75764	3.60063	3.56626	3.28271	3.58425	3.66186	3.36487	3.49448	3.48366	3.58483	3.56848	3.46275	3.65343	3.64982	3.85958	3.29933	3.85159	3.47137	3.82535	3.72473	3.55371	3.8124	3.85994	3.71377	3.62586	3.7757	4.01685	3.76326	NA	NA	NA	NA	NA	NA	NA	NA	NA
1623533_at	CG15140	5	4.04882	4.18907	4.05285	4.08267	4.08171	4.12421	4.03676	4.20863	4.29116	3.64469	4.03284	3.99155	3.95869	4.43298	4.07546	3.90283	4.01211	3.92243	3.93134	3.87317	4.11366	3.84458	3.87579	4.01719	3.9669	3.80336	3.78558	4.24611	3.97471	3.85956	3.77546	3.89052	3.75329	3.92749	3.91006	3.91306	NA	NA	NA	NA	NA	NA	NA	NA	NA
1623534_at	---	5	5.40697	5.48928	5.36733	4.95046	5.30485	5.13476	5.47832	5.2256	5.49345	5.23301	5.39743	5.3347	5.03474	5.53611	5.11029	5.56367	5.2632	5.25249	5.40121	5.36453	5.46718	5.56392	5.40407	5.24407	5.38732	5.14252	5.22012	5.31114	5.31455	5.49612	5.45248	5.68528	5.31062	5.28765	5.601	5.5679	NA	NA	NA	NA	NA	NA	NA	NA	NA
1623535_at	CG7164	5	3.77635	3.83053	3.98691	4.36325	3.9882	5.95396	3.93679	4.03755	3.90748	4.01733	4.0709	4.08674	3.92149	3.85062	3.82696	3.86884	3.83537	3.79514	3.82464	4.12226	4.16989	4.01701	3.84251	4.02746	4.01179	3.89403	4.27445	4.10491	3.88111	3.90857	3.98037	3.81175	4.57618	4.04272	3.9019	4.1232	0.221321	0.351944	-0.237818	0.538985	0.468381	-0.120418	0.0601593	0.216163	0.1174
1623536_s_at	CG11347	5	10.2977	10.6841	10.8056	10.587	10.2797	10.3983	10.3161	10.413	9.93363	9.97854	10.1373	10.4146	10.5803	10.7728	10.7054	10.7512	10.0758	10.5342	10.5951	10.7098	10.2112	10.045	10.3384	10.495	10.3759	10.9272	10.082	10.0463	10.5416	10.478	10.6653	10.6538	10.0238	10.1932	10.4377	10.4623	0.0152737	0.10522	0.130712	0.593525	0.486882	0.0534569	0.430403	0.431527	-0.0772553
1623537_at	---	5	5.96286	6.14358	6.01414	5.80394	5.8881	5.9588	5.63493	5.42043	5.5148	6.02291	5.72008	5.61289	5.82687	5.77606	5.62216	5.7968	5.42702	5.87016	5.48604	5.82611	5.41395	5.76327	5.48192	5.72389	6.17182	5.9929	5.41382	4.86907	5.55687	5.60061	5.78627	5.56588	5.76134	5.68127	5.73836	5.07687	0.0662771	0.226554	-0.140267	0.0813347	0.247952	-0.206866	0.587598	0.485033	-0.0665991
1623538_at	---	5	3.93259	3.97134	3.62353	3.73005	3.93779	3.8053	3.85279	3.78741	3.91825	3.6519	3.71419	3.92028	3.80339	3.76967	3.81073	3.74964	3.87083	3.70726	3.74164	3.6964	3.76865	3.95526	3.71521	3.70656	3.69153	3.78385	3.72512	3.81444	3.83982	3.95632	3.49894	3.74969	4.1449	3.95573	4.01065	3.98086	NA	NA	NA	NA	NA	NA	NA	NA	NA
1623539_at	CG30039	5	3.3485	3.42697	3.29509	3.57694	3.38087	3.32973	3.35614	3.40087	3.35588	3.2085	3.30384	3.38251	3.44039	3.27631	3.15072	3.33139	3.21223	3.36382	3.46273	3.30135	3.48106	3.44858	3.39544	3.4055	3.41803	3.4097	3.54606	3.54489	3.40481	3.19765	3.13867	3.5405	3.47008	3.2667	3.24826	3.39264	NA	NA	NA	NA	NA	NA	NA	NA	NA
1623540_at	CG31704	5	10.8352	11.2962	10.9407	11.6426	11.2753	11.97	10.7929	10.9114	11.1166	10.5209	10.7094	11.1702	10.766	11.2776	11.1243	11.6676	11.2385	11.5553	11.2963	11.6353	11.2656	10.4632	10.9272	11.3772	11.2532	10.7305	10.7976	10.319	11.4266	11.1454	10.6764	10.9192	11.1004	9.83351	11.0785	10.9686	0.190436	0.336459	0.117732	0.128453	0.297703	-0.244361	0.0256589	0.140434	-0.362094
1623541_at	---	5	4.02462	4.14853	4.32308	3.81235	4.00717	4.08701	4.35274	4.02068	4.45439	3.9932	4.07418	4.16536	4.00562	4.18631	3.77463	4.29497	4.24929	4.2708	4.05783	4.27484	4.12345	4.19357	3.95341	4.01795	3.92845	3.97998	4.07417	4.03086	4.05628	4.34575	4.0549	4.56687	4.27155	4.26859	4.11182	4.30131	NA	NA	NA	NA	NA	NA	NA	NA	NA
1623542_at	CG11373	5	3.4452	3.40974	3.55197	3.39779	3.33537	3.36488	3.3216	3.56646	3.51319	3.56948	3.39323	3.38735	3.31259	3.37551	3.42433	3.14389	3.44699	3.39744	3.39783	3.45462	3.75797	3.3602	3.42084	3.27857	3.47499	3.26332	3.37518	3.57736	3.35222	3.22774	3.23665	3.49545	3.41662	3.30884	3.34871	3.36597	NA	NA	NA	NA	NA	NA	NA	NA	NA
1623543_at	CG5807	5	9.35335	8.74864	8.43789	8.94075	9.18545	8.79177	9.20366	9.14312	9.20906	9.55425	9.52913	9.18385	9.35267	8.8028	9.08332	8.4868	9.53562	8.90621	9.17361	8.71825	8.96721	9.24105	9.17762	9.23174	9.13599	8.81405	9.51108	9.75203	9.15452	9.10082	9.07414	9.11121	9.39294	9.44491	9.0132	8.80841	0.607255	0.490957	-0.0503364	0.531413	0.465887	0.0860306	0.332058	0.396123	0.136367
1623544_at	comm3	5	6.72882	7.0962	6.91044	6.88858	6.58903	6.80868	6.61358	6.48012	6.67502	6.56244	6.67781	6.75652	6.9605	6.84215	6.93226	6.99424	6.94482	7.09565	6.92227	6.99147	6.98353	6.84795	6.77271	7.06267	6.90917	7.07425	6.68375	6.71604	6.94379	6.87993	6.86421	6.93724	6.78295	6.88284	6.90266	6.82091	NA	NA	NA	NA	NA	NA	NA	NA	NA
1623545_at	mus209	5	11.1593	9.95715	10.1746	10.0043	10.6175	9.9634	10.7431	10.7033	11.0125	10.8956	11.0974	10.9136	10.7833	10.7158	10.3324	9.97772	11.1405	9.81044	10.4809	9.91644	10.7494	10.7993	10.7452	10.4226	10.4173	10.0125	11.1033	11.5165	10.5023	10.596	10.4867	10.8523	10.7869	11.132	11.0369	11.0114	0.376019	0.411516	-0.113992	0.3074	0.38656	0.184366	0.152272	0.315132	0.298359
1623546_at	Taf8	5	8.32982	7.53281	7.71554	7.83099	7.93315	7.75309	7.90261	8.15147	8.16413	8.19311	8.2667	8.11189	8.22677	8.11217	7.98394	7.43435	8.30717	7.63981	7.76475	7.6013	7.96547	7.99403	7.97352	7.96827	7.78994	7.6845	8.27926	8.66563	7.90231	7.8826	8.00132	7.94601	8.10495	8.19927	8.13888	7.91658	0.435035	0.433239	-0.0761468	0.625406	0.49728	0.052163	0.348752	0.401652	0.12831
1623547_at	side	5	4.22788	4.69863	4.28135	4.30958	4.18	4.37959	4.31536	4.29949	4.39173	4.27262	4.18461	4.52056	4.2427	4.35954	4.13544	4.38634	4.02959	4.18354	4.128	4.38913	4.3818	4.38506	4.48606	3.99356	3.96946	4.08208	4.10942	3.92786	4.27083	4.48201	4.35945	4.45349	4.50557	4.13641	4.55074	4.16268	NA	NA	NA	NA	NA	NA	NA	NA	NA
1623548_at	CG18269	5	3.90611	3.90578	4.27413	4.19897	4.02534	4.09441	3.98616	4.00433	3.75933	3.87567	3.97005	4.0174	4.13175	4.04887	4.02025	4.31814	4.79261	4.22198	3.89129	3.80117	3.99398	4.03111	4.08965	3.90627	3.83553	4.04172	3.77676	4.20011	4.16291	3.96351	4.05904	3.84992	3.83037	3.98889	4.22265	4.13955	NA	NA	NA	NA	NA	NA	NA	NA	NA
1623549_at	yata	5	8.63111	8.48382	8.40515	8.43654	8.31006	8.3799	8.48888	8.5237	8.61109	8.54534	8.58488	8.51737	8.51878	8.67884	8.38991	8.46003	8.47501	8.38614	8.42855	8.39131	8.46877	8.54674	8.43747	8.5463	8.49179	8.32202	8.60682	8.68699	8.32322	8.43097	8.48221	8.59769	8.52912	8.49598	8.55701	8.4586	0.636006	0.500152	-0.0158323	0.883624	0.573484	0.00538142	0.674868	0.51223	0.0212137
1623550_at	Phlpp	5	4.33102	4.67362	4.49617	4.33412	4.55603	4.41947	4.52805	4.36463	4.49424	4.45197	4.09939	4.47413	4.24592	4.45309	4.15384	4.38114	4.42908	4.30804	4.40061	4.54345	4.818	4.51909	4.69254	4.21603	4.51287	3.96658	4.33342	4.22737	4.2421	4.45239	4.53039	4.42266	4.58656	4.65189	4.7706	4.63563	NA	NA	NA	NA	NA	NA	NA	NA	NA
1623551_at	CG18081	5	10.8192	10.8259	10.8707	11.0129	11.1083	10.9939	11.2336	11.0434	11.0452	11.1369	11.1978	11.1376	11.0368	10.8529	11.0497	10.9191	11.1989	11.0778	11.2187	10.9622	10.9894	11.2477	11.155	11.0884	11.0436	10.9593	11.2039	11.3111	11.2436	11.2036	10.963	10.953	11.2121	11.2739	10.9366	11.1797	0.325418	0.393293	0.0309251	0.152962	0.315508	0.0881474	0.282972	0.377322	0.0572223
1623552_s_at	CG2893	5	9.23272	9.18726	9.06668	8.74105	8.77424	8.62017	8.89385	8.91778	9.18892	9.03364	9.21434	8.9407	8.86889	9.15499	8.86019	8.75989	9.06198	8.82543	8.82905	8.65569	8.896	8.97255	8.84873	8.78308	8.9685	8.70835	9.19896	9.18035	8.86314	8.90503	8.92454	8.95863	8.83987	9.14814	9.07208	8.6033	0.101881	0.272832	-0.107907	0.657061	0.506384	-0.0367049	0.350222	0.402407	0.0712018
1623553_a_at	Miro	5	9.8424	9.84344	9.60875	9.79809	9.81271	9.89968	9.89657	9.67851	9.69248	9.91506	9.90009	9.78253	9.89318	9.6358	9.67809	9.56532	9.80019	9.85768	9.87804	9.74025	9.71474	9.8723	9.7368	9.87985	9.87291	9.86274	9.8912	9.77119	9.77403	9.83114	9.84385	9.76599	9.87818	9.82554	9.60794	9.69876	0.298673	0.38324	-0.0348389	0.927659	0.585258	-0.00390372	0.454076	0.439522	0.0309352
1623554_at	CG3708	5	4.72864	4.71046	4.60536	4.49401	4.51154	4.82498	4.58335	4.5896	4.80498	4.73029	4.53072	4.80819	4.87092	4.63504	4.61135	4.65294	4.49954	4.45507	4.41066	4.45257	4.70793	4.70242	4.50699	4.44018	4.62977	4.53422	4.71262	4.83055	4.58103	4.91378	4.72624	4.4611	4.69907	4.85321	4.61406	4.53829	NA	NA	NA	NA	NA	NA	NA	NA	NA
1623555_at	CG10131	5	8.70232	9.08868	9.19666	9.71555	9.42094	9.81187	8.91628	9.17381	8.99533	8.53363	8.9235	8.96838	8.24367	8.7877	8.99907	9.63835	8.26405	9.31344	8.68766	9.42389	8.56731	8.39852	8.7423	8.89567	9.23712	9.09928	8.43362	7.92974	9.19918	8.73103	8.66852	8.84698	8.58562	8.10529	8.51281	8.73382	0.013082	0.0968882	-0.290446	0.0206922	0.124617	-0.446996	0.468609	0.444979	-0.15655
1623557_at	CG31679	5	3.89067	4.28601	4.24049	4.0907	4.39336	3.97996	4.3442	4.06747	4.34878	4.09212	4.04568	4.29035	3.83446	4.20781	3.99126	4.00743	4.02314	4.25489	4.07124	4.01559	4.35405	4.08928	4.09095	4.05992	4.09108	4.14059	4.02446	3.99136	4.02021	3.90653	4.16802	4.03245	3.96075	4.22756	4.20335	4.0992	NA	NA	NA	NA	NA	NA	NA	NA	NA
1623558_at	Cpr49Ae	5	10.1146	10.5755	10.7706	10.5348	10.1195	9.99645	10.201	10.0755	9.80358	10.2769	10.2421	10.006	10.3417	10.3678	10.4404	10.8927	9.44638	10.2302	10.6786	10.706	9.67251	10.1697	10.293	10.4035	10.4463	10.584	9.73244	9.39066	10.0808	9.77333	10.2966	9.89753	9.47984	9.9499	9.62731	10.3384	0.495617	0.453137	0.0771772	0.0843694	0.251937	-0.259941	0.059384	0.215247	-0.337118
1623559_s_at	---	5	5.15159	5.35762	5.49616	4.87899	5.41905	5.25806	5.31349	5.53157	4.99213	5.31259	5.34333	5.19175	5.05051	5.45678	5.71376	5.22109	5.52659	5.09154	5.27782	5.59816	4.82446	5.25609	5.60844	5.49265	5.1606	5.36063	5.332	5.23836	5.17488	5.05865	5.27896	5.01868	4.85758	5.21717	5.0711	4.84732	NA	NA	NA	NA	NA	NA	NA	NA	NA
1623560_at	CG18048	5	7.22689	6.73797	6.4481	6.64829	6.72018	6.48221	7.06157	6.94525	7.18687	7.29895	7.2604	7.11765	7.1129	7.06156	6.8414	6.67017	7.17778	6.82665	6.88178	6.43344	6.93926	7.12295	6.87475	7.05299	6.81939	6.87232	7.31887	7.57421	6.95061	7.12506	6.85481	6.94907	7.03307	7.20466	7.2169	6.93322	0.90321	0.578727	-0.0115585	0.283889	0.377573	0.143155	0.16581	0.323395	0.154714
1623561_at	---	5	5.44952	5.45657	5.62319	5.31702	5.31548	5.4111	5.51611	5.35322	5.64456	5.24932	5.52198	5.49371	5.40386	5.60798	5.45024	5.59363	5.44591	5.51002	5.33032	5.54933	5.54151	5.44601	5.64216	5.41339	5.52756	5.44181	5.60062	5.67524	5.49904	5.6228	5.46171	5.68706	5.49145	5.63229	5.5233	5.56534	NA	NA	NA	NA	NA	NA	NA	NA	NA
1623562_at	CG14431	5	5.05584	5.37726	5.47628	5.1131	5.31482	5.30505	5.23796	5.2042	5.32932	4.95453	5.22162	4.92669	5.29944	5.42309	4.87806	5.51286	5.01774	5.06756	4.98943	5.13635	5.34216	5.39149	5.28986	4.88231	5.24464	5.1282	5.26295	5.09889	5.20691	5.25887	5.26924	5.27827	5.34606	5.08782	5.35435	5.41293	NA	NA	NA	NA	NA	NA	NA	NA	NA
1623563_at	---	5	4.49768	4.69023	4.5804	4.38867	4.82954	4.59276	4.60134	4.47489	4.5814	4.56762	4.4184	4.54112	4.58375	4.65397	4.52183	4.42325	4.60589	4.48783	4.46944	4.66427	4.56889	4.76558	4.57954	4.31289	4.46332	4.56136	4.43858	4.49022	4.45799	4.60577	4.48563	4.70823	4.69188	4.799	4.51312	4.7782	NA	NA	NA	NA	NA	NA	NA	NA	NA
1623564_at	Syx8	5	9.05514	9.13769	9.04164	9.05884	8.9803	9.2188	9.05384	8.76078	8.87823	8.91751	8.84987	9.11652	9.04543	9.21914	8.97128	9.19969	8.95974	9.20711	9.20101	9.14851	9.04358	9.03665	8.95253	9.04176	9.20869	9.11011	9.04371	8.97495	9.05911	9.17237	9.12833	9.07482	9.06179	9.01222	8.89975	9.40918	0.0567005	0.211201	0.0797728	0.0308511	0.154644	0.090488	0.811308	0.553984	0.0107152
1623565_at	CG17278	5	9.72798	10.1231	10.4345	10.3484	9.85601	10.2342	9.7043	9.90132	9.41261	9.40967	9.46024	9.92228	9.79463	9.98438	10.1751	10.3766	9.64873	9.75279	9.91665	10.3914	9.63086	9.54388	9.83152	10.0386	10.1195	10.2247	9.60447	9.38261	9.9573	9.81786	10.0738	10.0057	9.57638	9.47377	9.91068	9.66166	0.577678	0.48179	0.0458676	0.660551	0.507503	-0.060524	0.377945	0.412169	-0.106392
1623566_at	CG13957	5	6.71477	6.58389	6.41011	6.72453	6.7937	6.86353	7.01423	6.7545	6.80326	6.83611	6.8003	6.98994	6.58358	6.60548	6.67748	6.66896	6.92903	6.65683	6.7116	6.41087	6.53175	6.70881	6.51716	7.04639	6.82467	6.82057	6.80037	7.01056	6.96768	6.72473	7.14711	6.78661	6.74355	6.89001	6.74737	6.97129	NA	NA	NA	NA	NA	NA	NA	NA	NA
1623567_at	fz2	5	3.46909	3.91909	3.92869	3.7891	3.77083	3.90632	3.49852	4.02375	3.81048	3.76312	3.65806	3.68216	3.922	3.95512	3.91704	3.87416	3.89522	3.6402	3.9118	3.70317	4.05701	3.79535	3.98292	3.63279	3.91377	4.16288	3.67735	4.06033	3.45146	3.91021	4.13358	4.09079	3.81338	3.71003	4.02227	4.05838	NA	NA	NA	NA	NA	NA	NA	NA	NA
1623568_at	---	5	3.59975	3.88109	3.83563	3.72927	3.9243	3.65029	3.93534	3.88711	3.87689	3.95323	3.89001	4.18576	3.62447	3.78886	3.54825	3.80762	3.84823	3.65402	3.54831	3.7532	3.78693	3.69526	3.65596	3.89992	3.63703	3.76266	3.77111	3.92528	3.74837	4.12989	3.75573	3.67458	3.84738	3.58778	4.16728	3.85307	NA	NA	NA	NA	NA	NA	NA	NA	NA
1623569_at	CG14906 /// CG14907	5	8.29133	8.36613	8.76061	8.66744	8.37645	8.58785	8.58313	8.80261	8.45959	8.14096	8.14427	8.89979	8.18015	8.43111	8.2498	8.50583	8.30492	8.26696	8.49394	8.22829	8.29232	8.38168	8.14238	8.96022	8.28265	8.30525	8.10799	8.265	8.63778	8.36134	8.48932	8.43567	8.28899	8.11822	8.59805	8.67287	0.0700075	0.232293	-0.136882	0.16427	0.322815	-0.12642	0.881948	0.573044	0.0104625
1623570_at	CG7924	5	4.4214	4.27759	4.38588	4.47682	4.20988	4.08879	4.05667	4.68917	4.49244	4.07212	4.20682	4.09187	4.27835	4.35036	4.4537	4.31831	4.06756	4.54457	4.30134	4.45389	4.52667	4.17595	4.25928	4.12535	4.37422	4.35974	4.30115	3.97687	4.45667	3.93523	4.24317	4.15719	4.24771	3.89861	4.14436	4.2189	NA	NA	NA	NA	NA	NA	NA	NA	NA
1623571_a_at	CG9328	5	8.80047	8.68192	8.8103	8.75167	8.6915	8.75848	8.74275	8.77383	8.66738	8.73707	8.76632	8.7299	8.88703	8.69126	8.74442	8.51716	8.73911	8.81482	8.72331	8.59666	8.6726	8.58877	8.6817	8.38404	8.74502	8.709	8.72448	8.81025	8.85598	8.70749	8.70352	8.51633	8.52461	8.81445	8.53407	8.5955	0.0819993	0.248685	-0.0725618	0.150734	0.31391	-0.0559083	0.722047	0.52665	0.0166535
1623572_at	xmas-2	5	6.14593	5.21091	5.38594	5.64501	5.66274	5.26466	5.57039	5.97655	6.07719	6.06578	6.43778	5.83867	6.03466	5.70919	5.53929	5.34567	6.07285	5.19512	5.42846	5.43301	5.79296	5.93302	5.50926	5.56884	5.72539	5.31071	6.11064	6.60092	5.45723	5.81792	5.80228	5.88099	5.78659	6.30227	6.22121	5.83191	0.226321	0.354031	-0.143269	0.313907	0.389126	0.130543	0.100398	0.271627	0.273812
1623573_s_at	CG11266	5	10.7917	10.8313	10.7392	10.7221	10.6773	10.7092	10.6047	10.6576	10.668	10.6255	10.6936	10.6615	10.8499	10.854	10.7344	10.7998	10.8284	10.7011	10.7147	10.686	10.7701	10.6626	10.597	10.6839	10.7828	10.7233	10.7067	10.8402	10.7327	10.7675	10.9033	10.8748	10.6836	10.8098	10.8259	10.6376	0.0484183	0.195324	0.0416672	0.0487404	0.195927	0.0755295	0.377135	0.41186	0.0338623
1623574_at	CG11694	5	4.39242	4.46486	4.60544	4.53893	4.55712	4.55188	4.51631	4.49976	4.63812	4.33567	4.32167	5.0228	4.72262	4.81625	4.53666	4.72972	4.59359	4.49455	4.52032	4.51611	4.71809	4.63225	4.68095	4.69346	4.75669	4.40285	4.4642	4.47932	4.5042	4.64431	4.43686	4.46938	4.49598	4.49334	4.56502	4.49712	NA	NA	NA	NA	NA	NA	NA	NA	NA
1623575_at	---	5	3.45936	3.30438	3.48639	3.42494	3.29214	3.39177	3.37415	3.20013	3.38537	3.35378	3.28358	3.53449	3.1684	3.51011	3.22636	3.33875	3.49214	3.29219	3.37653	3.31129	3.21685	3.33884	3.4155	3.19728	3.26055	3.52264	3.41131	3.26936	3.10153	3.30913	3.43963	3.1847	3.50137	3.39132	3.54934	3.43265	NA	NA	NA	NA	NA	NA	NA	NA	NA
1623576_at	CG1850	5	4.69945	5.13932	4.88879	4.56352	4.83466	4.82993	4.56279	4.76299	4.84902	4.69039	4.53658	4.87861	4.80749	4.8083	5.01272	4.86646	4.56114	4.69302	4.6574	4.91837	4.82283	4.82776	4.8813	4.62563	4.67619	4.82639	4.6852	4.80344	4.62037	4.64897	4.95973	4.87769	4.73368	4.74406	5.23723	4.83164	NA	NA	NA	NA	NA	NA	NA	NA	NA
1623577_at	---	5	3.69812	4.30846	3.99673	3.69527	3.72592	3.69274	3.93821	3.70377	4.21404	4.18987	3.85062	4.19526	4.03594	3.88969	3.76027	3.62326	3.79373	3.93627	3.74903	4.0593	3.78356	3.96702	3.76055	3.97142	3.72843	3.82301	3.98985	3.9065	3.88435	3.79328	3.92174	3.80352	3.76187	4.17179	3.86188	3.9897	NA	NA	NA	NA	NA	NA	NA	NA	NA
1623578_at	---	5	3.8886	3.86512	3.82442	3.99935	3.76197	3.83833	4.01473	3.99485	3.90691	3.84613	4.08953	4.16366	4.02955	3.94367	3.67757	3.89039	3.88461	3.73729	3.55756	3.69698	4.00833	4.01906	3.675	3.79447	3.72509	3.73345	3.68384	3.91108	3.53886	3.91488	3.77429	3.61831	4.01834	3.98407	4.13904	3.76879	NA	NA	NA	NA	NA	NA	NA	NA	NA
1623579_at	CG33773	5	3.21615	3.32369	3.38458	3.43543	3.43926	3.28277	3.12168	3.32797	3.62182	3.27112	3.29199	3.58925	3.1042	3.37174	3.23722	3.39696	3.37587	3.49731	3.18294	3.21795	3.38752	3.29427	3.25418	3.31194	3.3231	3.2193	3.43623	3.11192	3.26735	3.03706	3.45578	3.29599	3.14278	3.37211	3.26243	3.34696	NA	NA	NA	NA	NA	NA	NA	NA	NA
1623580_at	alphaTub84B	5	12.799	12.3314	12.5925	13.063	13.1136	13.0119	13.2336	13.1559	12.9968	13.1349	13.3302	13.211	13.0917	12.6075	13.0774	12.7545	13.2538	12.9888	12.9599	12.9725	13.1684	13.1507	13.2172	13.118	13.0023	13.055	13.1368	13.243	13.0097	12.8012	12.8492	12.8459	13.1522	13.1902	12.8605	12.8991	0.657501	0.506504	0.0322098	0.957078	0.592237	0.00594206	0.732716	0.529996	-0.0262678
1623581_at	---	5	3.54592	3.66035	3.39078	3.53619	3.73908	3.68086	3.72636	3.60847	3.628	3.54637	3.55593	3.55828	3.69189	3.7377	3.52678	3.71886	3.63339	3.63548	3.61607	3.61284	3.66193	3.78126	3.63067	3.62299	3.70935	3.64176	3.705	3.73048	3.61473	3.62347	3.60934	3.62746	3.43466	3.49317	3.80366	3.47639	NA	NA	NA	NA	NA	NA	NA	NA	NA
1623582_at	CG6364	5	9.13404	8.6397	8.77375	8.83152	8.99591	8.71645	9.04557	9.02523	9.14179	9.15184	9.25787	9.12444	9.06475	8.96458	8.86104	8.57285	9.20418	8.71876	8.86371	8.61819	9.0238	9.02854	8.90086	9.05192	8.88664	8.76861	9.31746	9.55174	9.096	8.92698	8.8066	9.02262	9.11794	9.21882	8.98481	8.93632	0.22283	0.352613	-0.0804102	0.475594	0.447742	0.0663701	0.161992	0.321548	0.14678
1623583_at	PNUTS	5	9.03413	8.56361	8.51641	8.59621	8.55646	8.42539	8.55455	8.63594	8.76964	8.76835	8.81389	8.7805	8.82863	8.71946	8.62458	8.20914	8.7648	8.22498	8.68649	8.28078	8.55825	8.61787	8.57203	8.55809	8.69764	8.44834	8.90082	9.08554	8.54015	8.5391	8.65329	8.81852	8.60704	8.84876	8.80358	8.6659	0.0832304	0.250773	-0.114166	0.473673	0.447246	0.0494672	0.110623	0.280459	0.163634
1623584_at	hkl	5	9.61034	9.74256	9.49752	9.6168	9.64658	9.55904	9.70904	9.59268	9.6354	9.72982	9.81966	9.55137	9.59334	9.6891	9.55834	9.55972	9.71217	9.62558	9.64537	9.62585	9.71237	9.66115	9.69253	9.78485	9.6502	9.57761	9.59824	9.58442	9.56199	9.64066	9.56669	9.52928	9.60194	9.57604	9.58743	9.51077	NA	NA	NA	NA	NA	NA	NA	NA	NA
1623585_at	CG34383	5	4.79929	4.97994	4.73162	4.54597	4.72367	5.05344	4.75738	4.80634	5.01164	4.65485	4.87236	4.88095	4.7599	4.61897	4.72997	4.59706	4.75513	4.77819	4.54872	4.55478	4.9545	4.90911	4.889	4.72693	4.75138	4.7268	4.67455	4.65522	4.56865	4.52972	4.78704	4.7653	4.84224	4.78511	4.92293	4.77781	NA	NA	NA	NA	NA	NA	NA	NA	NA
1623586_a_at	pyx	5	5.47958	5.69291	5.8591	6.44216	5.35211	5.50721	6.07268	6.08523	5.7587	5.69452	6.11838	5.91648	5.77591	6.14752	5.81817	6.61152	6.04932	6.307	6.25041	6.78003	6.20325	5.43115	5.98126	7.01495	5.91022	5.87099	5.70135	6.14264	6.06036	6.01062	5.76586	6.13912	6.10474	5.4239	6.32344	6.45089	0.0102695	0.0841248	0.36595	0.147014	0.311906	0.160423	0.0376957	0.171875	-0.205527
1623587_at	CG31730	5	3.31265	3.59078	3.46199	3.52497	3.35183	3.45991	3.45458	3.50553	3.67818	3.43968	3.34185	3.29637	3.28116	3.57199	3.48843	3.67985	3.34527	3.34824	3.43682	3.55706	3.46429	3.59055	3.78794	3.22115	3.33057	3.38013	3.5098	3.33849	3.42512	3.36608	3.43167	3.54395	3.3945	3.43074	3.65755	3.2588	NA	NA	NA	NA	NA	NA	NA	NA	NA
1623588_at	EfTuM	5	10.4804	10.1978	10.2876	10.127	10.3873	10.27	10.6673	10.3674	10.6723	10.5392	10.5696	10.4	10.447	10.4064	10.3715	10.3084	10.5753	10.4413	10.5141	10.2718	10.6411	10.6937	10.5017	10.4744	10.3715	10.2318	10.3763	10.5392	10.4075	10.6058	10.2903	10.3994	10.485	10.6315	10.3535	10.4606	0.150893	0.313917	0.0567287	0.812419	0.55427	0.0155207	0.355656	0.404524	-0.041208
1623590_s_at	Smc5	5	8.07307	7.65396	7.14047	7.35624	7.60924	7.11064	7.56958	7.59712	7.79604	7.91187	7.98795	7.69728	7.91366	7.73125	7.51692	6.89416	8.16148	7.18636	7.61701	7.21182	7.558	7.81974	7.58149	7.77942	7.4304	7.14508	8.14684	8.33173	7.6164	7.89177	7.64287	7.75003	7.8935	8.09546	7.95888	7.45296	0.630662	0.498754	-0.0443475	0.334901	0.397198	0.154372	0.282908	0.377322	0.198719
1623591_a_at	CG17883	5	10.1789	10.0619	9.86666	10.2731	10.3906	10.222	10.3713	10.3299	10.2349	10.4254	10.4283	10.3064	10.3998	10.196	10.3345	10.1399	10.4337	10.3984	10.093	10.3437	10.3101	10.3494	10.2456	10.2831	10.3616	10.3059	10.4128	10.4431	10.4045	10.2996	10.2509	10.1228	10.3714	10.4851	10.2083	9.90287	0.541881	0.469415	0.036481	0.593544	0.486882	0.0399668	0.948269	0.590366	0.00348581
1623592_at	CG15894 /// DmirCG15894	5	4.55911	4.56703	4.51792	4.58204	4.11454	4.39344	4.25458	4.2354	3.95236	4.22105	4.2483	4.01036	4.27489	4.21197	4.63981	4.53833	4.04031	4.10392	4.01449	4.31038	4.00133	4.285	4.23683	3.92978	4.30895	4.27491	4.01852	4.02524	4.12337	4.25769	4.35112	4.363	4.36403	4.22919	4.10769	4.25303	NA	NA	NA	NA	NA	NA	NA	NA	NA
1623593_at	---	5	3.451	3.85305	3.63477	3.38584	3.63927	3.53136	3.7295	3.64127	3.4195	3.51238	3.58624	3.73094	3.56727	3.57839	3.65548	3.66646	3.63136	3.54025	3.63382	3.41521	3.55034	3.85647	3.52679	3.46727	3.51774	3.42387	3.50616	3.78983	3.51361	3.41318	3.74421	3.51	3.68568	3.56493	3.71416	3.82882	NA	NA	NA	NA	NA	NA	NA	NA	NA
1623594_at	blow	5	7.19439	7.19578	7.24077	7.08558	6.84202	6.85396	6.67877	6.85257	6.76845	6.81988	7.10029	6.87934	7.19902	7.01198	6.98229	7.0562	7.11014	7.04204	7.22937	6.97927	6.89642	6.8365	6.99338	7.06743	7.07323	7.03019	7.01764	7.20363	6.81976	7.09294	7.04248	7.05822	6.93325	7.03019	7.18834	7.1026	NA	NA	NA	NA	NA	NA	NA	NA	NA
1623595_at	CG5439	5	9.03569	8.52733	8.51693	8.54781	8.58066	8.38748	8.52111	8.5971	8.66376	8.7335	8.95518	8.77754	8.78362	8.72649	8.62975	8.31102	9.00223	8.33704	8.50163	8.48806	8.70393	8.58003	8.51996	8.69438	8.47884	8.49779	8.86885	9.14868	8.61017	8.70529	8.49335	8.5755	8.72162	8.82484	8.68879	8.33348	0.483903	0.450382	-0.0471602	0.929155	0.58549	0.00859308	0.596807	0.488022	0.0557533
1623596_at	Cpr72Eb	5	4.21022	4.36303	4.48405	4.21903	4.40885	4.16442	4.47802	4.20695	4.3246	4.64519	4.10252	4.36529	4.5013	4.20435	4.17843	4.11734	4.27102	4.13219	4.16349	4.60735	4.41012	4.44086	4.452	4.266	4.3315	4.35376	4.54421	4.11469	4.29443	4.28491	4.3753	4.3052	4.34747	4.3787	4.28227	4.40387	NA	NA	NA	NA	NA	NA	NA	NA	NA
1623597_s_at	CG17684	5	5.25277	5.80236	5.5731	5.5375	5.14785	5.78907	5.06846	5.1668	5.22551	4.96438	5.04253	5.20487	5.28424	5.42843	5.36345	5.53808	4.81932	5.5734	5.2782	5.49035	5.32378	5.32623	5.17899	5.30062	5.17052	5.7245	4.94314	4.80914	5.46008	5.31761	5.40307	5.25447	5.24128	5.24496	4.81882	4.84427	NA	NA	NA	NA	NA	NA	NA	NA	NA
1623598_at	---	5	4.04694	4.57467	4.17268	4.04399	4.06258	3.9877	4.10591	4.03899	4.0875	4.13399	4.04974	4.10515	4.12706	4.05878	3.9232	3.92203	3.96634	4.13629	4.08506	4.12426	3.94586	4.11593	4.09061	3.98445	3.87456	4.05338	4.09483	4.21078	3.83132	4.06637	4.51058	4.22554	4.08901	4.15749	4.46453	4.3256	NA	NA	NA	NA	NA	NA	NA	NA	NA
1623599_at	boca	5	9.52134	9.49	9.68811	9.76166	9.66056	9.73708	9.63322	9.59828	9.62675	9.57612	9.6375	9.55484	9.44969	9.43062	9.54418	9.56806	9.73517	9.56783	9.67666	9.56437	9.47602	9.49683	9.61834	9.50034	9.50334	9.61312	9.59263	9.70667	9.62147	9.47019	9.42994	9.42192	9.50835	9.48906	9.3748	9.52144	0.0122223	0.0929747	-0.0714466	0.00880159	0.0757585	-0.102711	0.450204	0.437883	-0.0312644
1623600_at	---	5	4.00671	3.91026	4.15124	3.81494	3.83371	4.01628	4.02466	3.94952	3.79949	3.78866	3.9872	4.12246	3.93491	4.13202	3.85762	3.82248	3.76235	4.03924	3.92042	4.08949	4.23994	4.25526	4.04732	3.86551	3.91174	3.92357	3.89668	3.68997	3.88584	3.83613	4.20831	4.10211	4.29079	3.97201	4.16848	4.05976	NA	NA	NA	NA	NA	NA	NA	NA	NA
1623602_a_at	Ptp69D	5	7.22121	6.49693	6.1785	6.82702	6.84166	6.51352	6.67778	7.0608	6.7826	7.27882	7.31519	6.84069	7.18595	6.72167	6.71764	6.35757	7.45023	6.44923	6.83418	6.60662	6.47014	6.89158	6.80739	6.99414	6.77371	6.66113	7.2579	7.5681	6.79357	6.78943	6.74019	6.74093	6.97875	7.08641	6.82668	6.77272	0.692502	0.517312	-0.0456977	0.564569	0.477265	0.0795663	0.396635	0.419403	0.125264
1623603_at	CG4793	5	3.35987	3.42016	3.65967	3.22159	3.29772	3.47075	3.4995	3.49055	3.32167	3.33739	3.47725	3.1861	3.5539	3.57191	3.40214	3.53058	3.49244	3.24133	3.23166	3.28871	3.36337	3.42179	3.62905	3.26326	3.38285	3.38194	3.37216	3.47865	3.31493	3.40381	3.52705	3.34751	3.37264	3.30288	3.47902	3.35063	NA	NA	NA	NA	NA	NA	NA	NA	NA
1623604_at	CG7742	5	4.02775	4.32134	4.25787	3.93264	3.93231	4.03921	3.87583	3.89572	4.05927	4.00757	3.87265	3.8518	3.89011	4.28593	3.97209	3.99474	3.79634	4.18721	3.83535	4.16679	4.05262	4.05911	3.96845	3.87927	4.03374	4.00537	3.76152	4.01395	3.85276	4.15679	4.26835	3.92981	3.99845	4.10596	4.11355	4.20107	NA	NA	NA	NA	NA	NA	NA	NA	NA
1623605_a_at	cbt	5	11.3058	11.8406	11.7321	11.5528	11.3806	11.406	11.3149	12.0339	11.132	11.1473	11.5313	11.4297	11.2721	11.576	11.4397	11.6835	11.2257	11.5626	11.1647	11.67	11.4856	11.1723	11.5267	11.3527	11.2732	11.4424	11.2251	11.0899	11.3904	11.3538	11.0963	11.802	11.3968	11.0704	11.4838	11.0198	0.366191	0.40789	-0.0562896	0.0209437	0.124942	-0.180258	0.0585728	0.21407	-0.123968
1623606_at	RpLP1	5	14.8155	14.7793	14.7873	14.7514	14.778	14.7515	14.783	14.8011	14.8121	14.7849	14.7982	14.8001	14.7774	14.7614	14.7697	14.7827	14.7928	14.7538	14.794	14.729	14.8311	14.794	14.7752	14.7683	14.7588	14.7609	14.7816	14.8322	14.794	14.8188	14.7951	14.7837	14.7902	14.8319	14.8205	14.8471	NA	NA	NA	NA	NA	NA	NA	NA	NA
1623607_at	Mgat1	5	8.829	8.65027	8.56843	8.69355	8.71863	8.69341	8.5728	8.62458	8.61739	8.81151	8.87189	8.63722	8.78842	8.69744	8.7161	8.68193	8.92354	8.50911	8.60366	8.59011	8.44883	8.63919	8.63358	8.7262	8.59699	8.72586	8.90248	8.95359	8.68669	8.72314	8.74379	8.66257	8.77473	8.80004	8.74112	8.54048	0.511483	0.458133	-0.027549	0.343511	0.399861	0.0468973	0.195131	0.3388	0.0744463
1623608_at	---	5	3.54491	3.63353	3.68449	3.60257	3.52407	3.54874	3.53358	3.52187	3.6677	3.38194	3.60006	3.46259	3.35445	3.71397	3.66847	3.76683	3.50455	3.4077	3.55173	3.69406	3.71797	3.40031	3.6607	3.39664	3.50345	3.45599	3.70221	3.50429	3.44355	3.57773	3.58016	3.79979	3.31179	3.54627	3.73276	3.55286	NA	NA	NA	NA	NA	NA	NA	NA	NA
1623609_at	CG15172	5	3.77765	3.83004	3.91257	3.6943	3.34588	3.54925	3.62387	3.74323	3.72605	3.75384	3.58308	3.3753	3.49173	3.63125	3.39304	3.79414	3.46913	3.69304	3.55668	3.66191	3.70954	3.64671	3.48552	3.47625	3.39937	3.54398	3.46002	3.42896	3.60016	3.44718	3.49822	3.42979	3.46637	3.47352	3.64927	3.76775	NA	NA	NA	NA	NA	NA	NA	NA	NA
1623610_at	CG34357	5	3.85989	3.85755	3.65084	3.71719	3.77642	3.72617	3.67697	3.90495	3.72769	3.68649	3.87431	3.62533	3.62023	3.92804	3.80693	3.71808	3.6091	3.79704	3.72224	3.80384	3.81967	3.88245	3.91143	3.53171	3.66007	3.689	3.67342	3.81488	3.77275	3.73227	3.74679	4.0635	3.84568	3.85012	3.87503	4.03803	NA	NA	NA	NA	NA	NA	NA	NA	NA
1623611_at	---	5	4.16074	3.90968	3.84883	3.96738	4.20371	4.15616	4.0449	4.06075	4.03243	4.16545	4.16131	4.21504	3.9118	4.29246	3.84551	4.25327	4.17175	4.26081	3.95497	3.84641	3.9599	4.14846	4.06799	3.88079	4.28699	3.99854	4.25146	4.14223	3.86128	4.10343	4.05751	4.06698	4.08081	4.12592	4.20696	4.31618	NA	NA	NA	NA	NA	NA	NA	NA	NA
1623612_at	CG7722 /// DsimCG7722	5	8.79815	9.55295	9.70315	10.0501	9.49351	9.95913	9.10364	9.15881	8.61611	8.81392	8.89164	9.15359	9.27275	9.27436	9.65696	9.52693	8.94825	9.71769	9.26164	9.88775	9.06059	8.84208	9.12262	9.35683	9.03206	9.79465	8.88939	8.40958	9.53813	9.14665	9.09062	9.14265	8.77244	8.4934	8.71967	8.8462	0.655415	0.505841	0.0528122	0.103746	0.274661	-0.284938	0.0372316	0.17084	-0.33775
1623613_at	CG13762	5	3.17545	3.80252	3.4502	3.11647	3.4926	3.26042	3.51193	3.29027	3.41921	3.50687	3.43942	3.48547	3.36443	3.51283	3.33911	3.28033	3.27543	3.13699	3.4315	3.25189	3.56303	3.45955	3.35014	3.63537	3.39922	3.20183	3.325	3.3399	3.19104	3.40598	3.30533	3.26916	3.52997	3.39965	3.37484	3.4047	NA	NA	NA	NA	NA	NA	NA	NA	NA
1623614_at	CG12531	5	4.18959	4.12377	4.31481	4.14592	4.17617	3.97603	4.40048	4.33066	4.13809	4.0165	4.07166	4.11613	3.81832	4.21657	3.82995	4.33816	3.98018	4.08461	4.054	4.35928	4.33166	4.43047	4.42626	3.97149	4.17505	4.30665	4.2685	4.5878	4.08657	4.11333	4.19898	4.28	4.20221	4.13075	4.23382	4.42088	NA	NA	NA	NA	NA	NA	NA	NA	NA
1623615_at	CG8675	5	9.57623	9.41106	9.1054	9.32293	9.6755	9.43017	9.89781	9.4166	9.78794	9.84131	9.69554	9.60336	9.46366	9.28474	9.42152	9.07668	9.89627	9.38439	9.82677	9.2424	9.39931	9.83449	9.52123	9.6754	9.64511	9.52762	9.8827	9.78853	9.65573	9.58811	9.6837	9.62732	9.71303	9.81782	9.47691	9.56293	0.297767	0.382881	-0.0614174	0.246514	0.363226	0.100471	0.0726689	0.23584	0.161889
1623616_at	---	5	3.18313	3.63315	3.31613	3.45215	2.9919	3.29551	3.25484	3.42458	3.26902	3.33688	3.45363	3.344	3.07337	3.16534	3.26507	3.03121	3.37765	3.24478	3.27562	3.24212	3.24787	3.08317	3.26522	3.37091	3.21132	3.04214	3.38771	3.38329	3.4262	2.97462	3.15774	3.1597	3.19902	3.33166	3.33385	3.31548	NA	NA	NA	NA	NA	NA	NA	NA	NA
1623617_at	---	5	5.74714	5.81379	5.63878	5.42872	5.55157	5.39072	5.71198	5.59095	5.94295	5.58879	5.46346	5.69858	5.57992	5.58829	5.51455	5.50523	5.5993	5.51714	5.5823	5.69981	5.60509	5.61149	5.73588	5.41053	5.47003	5.58141	5.62341	5.72579	5.66871	5.49341	5.44059	5.78819	5.76259	5.74541	5.86249	5.65692	NA	NA	NA	NA	NA	NA	NA	NA	NA
1623618_at	CG34356	5	4.00255	3.87502	3.92903	3.86021	4.08128	3.93376	4.07054	3.98248	4.06421	3.82394	3.85684	4.01605	3.7611	3.79523	3.92576	3.93667	4.06871	3.91815	3.90585	3.96341	4.11373	4.10567	3.77331	3.66455	3.66117	3.78501	3.91497	4.24207	3.66365	3.59527	3.87896	3.90411	4.05126	3.9977	3.79563	4.08714	NA	NA	NA	NA	NA	NA	NA	NA	NA
1623619_at	CG15684	5	4.09467	4.55597	4.08826	4.233	4.15433	4.15348	4.26698	4.30181	4.11494	4.31613	4.04647	4.31926	4.20574	4.4445	3.85579	4.32262	4.14889	3.94334	4.21702	4.21091	4.5007	4.1927	4.04261	4.13893	4.20662	3.87577	4.23953	4.12756	4.14039	4.20311	4.18961	4.11318	4.05836	4.01792	4.27911	4.182	NA	NA	NA	NA	NA	NA	NA	NA	NA
1623620_a_at	rho-6	5	5.65608	6.00666	6.23051	6.01142	5.76527	5.62289	5.42656	5.57913	5.20451	5.79441	5.64366	5.21517	5.47626	5.475	6.1079	6.10326	5.28812	5.83991	5.76833	5.8769	5.32128	5.37631	6.00096	5.68978	5.63061	6.45123	5.67284	5.33034	5.62352	5.68636	5.69345	5.73864	5.78664	5.40309	5.73331	5.72998	0.892879	0.575762	0.0139768	0.823936	0.557428	0.0269774	0.921826	0.58376	0.0130005
1623621_at	---	5	3.64872	3.759	3.51022	3.64125	4.03182	3.73812	3.70137	3.70253	4.12226	3.55809	3.94203	3.77206	3.63396	3.71681	3.6684	3.59025	3.68395	3.80927	3.79207	3.50869	3.714	3.52852	3.69321	3.8007	3.61239	3.60011	3.45155	3.70492	3.70915	3.48167	3.73415	3.5093	3.56355	3.7035	3.61253	3.63959	NA	NA	NA	NA	NA	NA	NA	NA	NA
1623622_a_at	CG12862	5	4.78415	4.79148	4.93223	4.56556	4.64971	4.58091	4.32284	4.75107	4.61599	4.42013	4.46605	4.60505	4.74303	4.7775	4.33705	4.59494	4.5015	4.3358	4.48449	4.42134	4.78105	4.51638	4.57024	4.67608	4.45394	4.66722	4.57809	4.9481	4.36726	4.50624	4.59024	4.62259	4.5507	4.58465	4.51697	4.57459	NA	NA	NA	NA	NA	NA	NA	NA	NA
1623623_at	---	5	4.87364	4.93547	4.93675	4.49043	4.83637	5.01571	4.96391	4.65864	4.82887	4.78934	4.63652	4.8301	4.76153	4.77717	4.64637	4.89029	4.91875	4.87229	4.83222	4.70565	4.54718	4.97133	4.98787	4.8103	4.73971	4.80866	4.76962	4.83983	4.61832	4.8487	5.03044	4.91194	4.85366	4.98539	4.90321	4.98791	NA	NA	NA	NA	NA	NA	NA	NA	NA
1623624_at	CG14869	5	7.88749	8.16607	8.13255	8.11321	8.18877	8.20783	8.06639	8.21549	7.9057	8.16853	8.12712	7.89684	7.84163	8.13002	8.48843	8.37047	8.41226	8.27357	8.16411	8.29826	8.15936	8.21841	8.24089	8.58113	7.68768	8.35744	7.98662	8.09756	8.18204	8.12192	8.1548	8.34981	8.11764	8.12443	8.02787	8.14762	0.0118147	0.0909089	0.175211	0.599258	0.488528	0.0232844	0.0242719	0.135946	-0.151926
[truncated: 17,883 more rows]
