# Supplementary material for: Dietary switch reveals fast coordinated gene expression changes in Drosophila melanogaster
Source: Aging (Albany NY). 2014 May 14;6(5):355–68. doi: 10.18632/aging.100662 (PMC4069263; doi:10.18632/aging.100662)
Supplement: Supplementary file 4 [file aging-06-355-s004.xlsx]

## Sheet: Go_respiratory
Looking in Drosophila_2 array for GO ID: 006210 mitochondrial electron transport, NADH to ubiquinone. (Total Probes in this GO: 35, Probes with diferential expression in CR: 10)
+
Looking in Drosophila_2 array for GO Description: mitochondrial electron (total probes:70, Probes that change: 19)
+
Looking in Drosophila_2_array for GO Description: electron transport (total probes:88, Probes that change: 22)
Probeset	Gene ID	Categories	Gene Title	go biological process term	go molecular function term	go cellular component term
1624776_a_at	mtacp1	2	NADH-ubiquinone oxidoreductase acyl-carrier subunit	mitochondrial electron transport, NADH to ubiquinone /// fatty acid biosynthetic process /// fatty acid biosynthetic process /// transport /// lipid biosynthetic process /// electron transport chain	acyl carrier activity /// acyl carrier activity /// protein binding /// phosphopantetheine binding /// cofactor binding	mitochondrion /// mitochondrion /// respiratory chain
1630156_at	CG12859	2	anon-fast-evolving-3B12	mitochondrial electron transport, NADH to ubiquinone /// oxidation reduction	NADH dehydrogenase activity /// NADH dehydrogenase activity /// oxidoreductase activity	mitochondrial respiratory chain complex I
1633698_at	l(3)neo18	2	lethal (3) neo18	response to reactive oxygen species /// mitochondrial electron transport, NADH to ubiquinone /// determination of adult lifespan /// oxidation reduction	NADH dehydrogenase activity /// NADH dehydrogenase activity /// NADH dehydrogenase (ubiquinone) activity /// NADH dehydrogenase (ubiquinone) activity /// oxidoreductase activity	mitochondrial respiratory chain complex I
1634249_s_at	Pdsw	2	Pdsw	mitochondrial electron transport, NADH to ubiquinone /// oxidation reduction	NADH dehydrogenase activity /// NADH dehydrogenase activity /// NADH dehydrogenase (ubiquinone) activity /// NADH dehydrogenase (ubiquinone) activity /// oxidoreductase activity	mitochondrial respiratory chain complex I
1634417_s_at	CG3683	2	NADH ubiquinone oxidoreductase 19 kDa	mitochondrial electron transport, NADH to ubiquinone	NADH dehydrogenase activity /// NADH dehydrogenase activity /// protein binding /// NADH dehydrogenase (ubiquinone) activity /// NADH dehydrogenase (ubiquinone) activity	mitochondrial respiratory chain complex I
1635784_a_at	CG32230	2	NADH ubiquinone oxidoreductase MLRQ	mitochondrial electron transport, NADH to ubiquinone /// oxidation reduction	NADH dehydrogenase activity /// NADH dehydrogenase activity /// oxidoreductase activity	mitochondrial respiratory chain complex I
1641599_at	CG3621	2	NADH ubiquinone oxidoreductase B14.5A	mitochondrial electron transport, NADH to ubiquinone /// ATP synthesis coupled electron transport /// oxidation reduction	NADH dehydrogenase activity /// NADH dehydrogenase activity /// NADH dehydrogenase (ubiquinone) activity /// NADH dehydrogenase (ubiquinone) activity /// oxidoreductase activity	mitochondrial inner membrane /// mitochondrial respiratory chain complex I
1630611_at	CG7181	2	---	mitochondrial electron transport, cytochrome c to oxygen /// oxidation reduction	cytochrome-c oxidase activity /// cytochrome-c oxidase activity /// oxidoreductase activity	mitochondrial respiratory chain complex IV
1640491_at	CG14482	2	Ubiquinol-cytochrome c oxidoreductase 6.4 kDa	mitochondrial electron transport, ubiquinol to cytochrome c /// mitochondrial electron transport, ubiquinol to cytochrome c /// oxidation reduction	ubiquinol-cytochrome-c reductase activity /// ubiquinol-cytochrome-c reductase activity /// electron carrier activity /// oxidoreductase activity	mitochondrial respiratory chain complex III /// mitochondrial membrane
1640672_at	CG11015	2	Cytochrome c oxidase Vb	mitochondrial electron transport, cytochrome c to oxygen /// oxidation reduction	cytochrome-c oxidase activity /// cytochrome-c oxidase activity /// oxidoreductase activity	mitochondrion /// mitochondrial envelope /// mitochondrial respiratory chain complex IV /// lipid particle
1626331_at	CG7712	6	NADH ubiquinone oxidoreductase B14	mitochondrial electron transport, NADH to ubiquinone /// oxidation reduction	NADH dehydrogenase activity /// NADH dehydrogenase activity /// NADH dehydrogenase (ubiquinone) activity /// NADH dehydrogenase (ubiquinone) activity /// oxidoreductase activity	mitochondrial respiratory chain complex I
1637018_at	CG5548	6	NADH ubiquinone oxidoreductase B18	mitochondrial electron transport, NADH to ubiquinone /// oxidation reduction	NADH dehydrogenase activity /// NADH dehydrogenase activity /// NADH dehydrogenase (ubiquinone) activity /// NADH dehydrogenase (ubiquinone) activity /// oxidoreductase activity	mitochondrion /// mitochondrial respiratory chain complex I
1641506_at	CG12400	6	NADH ubiquinone oxidoreductase B14.5B	mitochondrial electron transport, NADH to ubiquinone /// mitochondrial electron transport, NADH to ubiquinone /// transport /// electron transport chain /// oxidation reduction	NADH dehydrogenase activity /// NADH dehydrogenase activity /// NADH dehydrogenase (ubiquinone) activity /// NADH dehydrogenase (ubiquinone) activity /// oxidoreductase activity	mitochondrion /// mitochondrial inner membrane /// mitochondrial respiratory chain complex I /// membrane /// respiratory chain
1625412_at	CG4769	6	Ubiquinol-cytochrome c oxidoreductase Cytochrome C1	oxidative phosphorylation /// mitochondrial electron transport, ubiquinol to cytochrome c	iron ion binding /// protein binding /// electron carrier activity /// heme binding /// electron transporter, transferring electrons within CoQH2-cytochrome c reductase complex activity	mitochondrial respiratory chain complex III /// lipid particle
1635947_at	CG9603	6
1639507_at	SdhC	6	succinate dehydrogenase C	tricarboxylic acid cycle /// tricarboxylic acid cycle /// succinate metabolic process /// mitochondrial electron transport, succinate to ubiquinone /// mitochondrial electron transport, succinate to ubiquinone /// response to oxidative stress /// determination of adult lifespan /// oxidation reduction	succinate dehydrogenase activity /// succinate dehydrogenase activity /// succinate dehydrogenase (ubiquinone) activity /// succinate dehydrogenase (ubiquinone) activity /// electron carrier activity /// oxidoreductase activity /// oxidoreductase activity, acting on the CH-CH group of donors	mitochondrial respiratory chain complex II /// membrane /// plasma membrane succinate dehydrogenase complex
1639962_a_at	CoVa	6	cytochrome c oxidase subunit Va	mitochondrial electron transport, cytochrome c to oxygen /// positive regulation of cell cycle	cytochrome-c oxidase activity /// cytochrome-c oxidase activity /// cytochrome-c oxidase activity /// protein binding /// metal ion binding	mitochondrion /// mitochondrial inner membrane /// mitochondrial inner membrane /// mitochondrial respiratory chain complex IV /// mitochondrial respiratory chain complex IV /// lipid particle /// membrane
1632277_a_at	HDAC6	6	histone deacetylase HDA2	tricarboxylic acid cycle /// histone deacetylation /// respiratory electron transport chain /// regulation of transcription	histone deacetylase activity /// histone deacetylase activity /// histone deacetylase activity /// protein binding /// zinc ion binding /// hydrolase activity	cytoplasm
1634641_a_at	Cyt-b5	6	Cyt-b5	transport /// electron transport chain	electron carrier activity /// electron carrier activity /// heme binding /// metal ion binding	endoplasmic reticulum /// endoplasmic reticulum membrane /// microsome /// microsome /// microsome /// lipid particle /// membrane /// membrane /// integral to membrane
1636570_at	mex1	6	midgut expression 1	multicellular organismal development /// midgut development /// embryo development /// electron transport chain	cytochrome-c oxidase activity /// copper ion binding /// protein binding /// electron carrier activity	integral to membrane
1627945_at	Fdxh	7	Ferredoxin	transport /// electron transport chain	electron carrier activity /// electron carrier activity /// electron carrier activity /// metal ion binding /// iron-sulfur cluster binding /// 2 iron, 2 sulfur cluster binding	mitochondrion /// mitochondrial matrix
1632532_s_at	wal	7	Electron transfer flavoprotein	morphogenesis of an epithelium /// oxidative phosphorylation /// open tracheal system development /// Malpighian tubule morphogenesis /// head involution /// ectodermal digestive tract morphogenesis	electron carrier activity /// electron carrier activity /// FAD or FADH2 binding	mitochondrial matrix /// lipid particle /// mitochondrial electron transfer flavoprotein complex
1625128_a_at	CG2249	8	anon-fast-evolving-3A1	mitochondrial electron transport, cytochrome c to oxygen /// oxidation reduction	cytochrome-c oxidase activity /// cytochrome-c oxidase activity /// oxidoreductase activity	mitochondrial respiratory chain complex IV
Oxidative phosphorylation
1628777_at	CG12140	6
Loading Category 6 in Flymine and mining for energy related GO
The results included the 10 Probesets displayed above, plus these ones:
Probeset	Gene ID	Categories	Gene Title	go biological process term	go molecular function term	go cellular component term							dihydrolipoamide branched chain acyltransferase activity /// protein binding /// acyltransferase activity /// transferase activity /// dihydrolipoyllysine-residue (2-methylpropanoyl)transferase activity /// cofactor binding	mitochondrial oxoglutarate dehydrogenase complex
1625125_at	CG5599	6	Glutamate dehydrogenase	tricarboxylic acid cycle /// phagocytosis, engulfment /// metabolic process /// fatty-acyl-CoA biosynthetic process	dihydrolipoamide branched chain acyltransferase activity /// protein binding /// acyltransferase activity /// transferase activity /// dihydrolipoyllysine-residue (2-methylpropanoyl)transferase activity /// cofactor binding	mitochondrial oxoglutarate dehydrogenase complex							electron-transferring-flavoprotein dehydrogenase activity /// electron-transferring-flavoprotein dehydrogenase activity /// oxidoreductase activity	mitochondrial inner membrane /// lipid particle /// microtubule associated complex
1628777_at	CG12140	6	Electron transfer flavoprotein-ubiquinone oxidoreductase	oxidative phosphorylation /// oxidation reduction	electron-transferring-flavoprotein dehydrogenase activity /// electron-transferring-flavoprotein dehydrogenase activity /// oxidoreductase activity	mitochondrial inner membrane /// lipid particle /// microtubule associated complex							nucleic acid binding /// nucleic acid binding /// zinc ion binding	intracellular /// nucleus
1629347_at	klu	6	klumphuss	tricarboxylic acid cycle /// larval feeding behavior /// negative regulation of Ras protein signal transduction /// positive regulation of compound eye retinal cell programmed cell death	nucleic acid binding /// nucleic acid binding /// zinc ion binding	intracellular /// nucleus							glycogen (starch) synthase activity /// glycogen (starch) synthase activity /// protein binding /// transferase activity /// transferase activity, transferring glycosyl groups	---
1630044_s_at	CG6904 /// DanaGF17161 /// DereGG20891 /// DgriGH14560 /// DmojGI23664 /// DperGL21689 /// DpseGA19945 /// DsecGM25805 /// DsimGD20381 /// DvirGJ23225 /// DwilGK13980 /// DyakGE26410	6	Glycogen synthase /// /// /// /// /// /// GA19945 /// /// /// /// ///	glycogen biosynthetic process /// glycogen biosynthetic process	glycogen (starch) synthase activity /// glycogen (starch) synthase activity /// protein binding /// transferase activity /// transferase activity, transferring glycosyl groups	---							DNA binding /// DNA binding /// sequence-specific DNA binding transcription factor activity /// sequence-specific DNA binding transcription factor activity /// steroid hormone receptor activity /// receptor activity /// ligand-dependent nuclear receptor activity /// ligand-dependent nuclear receptor activity /// ligand-dependent nuclear receptor activity /// zinc ion binding /// sequence-specific…	nucleus /// nucleus /// nucleus
1639398_at	Hr96	6	Hormone receptor-like in 96	transcription /// regulation of transcription, DNA-dependent /// regulation of transcription	DNA binding /// DNA binding /// sequence-specific DNA binding transcription factor activity /// sequence-specific DNA binding transcription factor activity /// steroid hormone receptor activity /// receptor activity /// ligand-dependent nuclear receptor activity /// ligand-dependent nuclear receptor activity /// ligand-dependent nuclear receptor activity /// zinc ion binding /// sequence-specific…	nucleus /// nucleus /// nucleus							nucleotide binding /// catalytic activity /// glutamate dehydrogenase activity /// glutamate dehydrogenase [NAD(P)+] activity /// glutamate dehydrogenase [NAD(P)+] activity /// glutamate dehydrogenase [NAD(P)+] activity /// binding /// ATP binding /// GTP binding /// oxidoreductase activity /// oxidoreductase activity, acting on the CH-NH2 group of donors, NAD or NADP as acceptor /// identical pr…	mitochondrion /// mitochondrion /// mitochondrial matrix /// mitochondrial matrix /// mitochondrial matrix
1640835_a_at	Gdh	6	Glutamate dehydrogenase	NADH oxidation /// cellular amino acid metabolic process /// glutamate metabolic process /// metabolic process /// aerobic respiration /// glutamate catabolic process to 2-oxoglutarate /// sperm storage /// oxidation reduction	nucleotide binding /// catalytic activity /// glutamate dehydrogenase activity /// glutamate dehydrogenase [NAD(P)+] activity /// glutamate dehydrogenase [NAD(P)+] activity /// glutamate dehydrogenase [NAD(P)+] activity /// binding /// ATP binding /// GTP binding /// oxidoreductase activity /// oxidoreductase activity, acting on the CH-NH2 group of donors, NAD or NADP as acceptor /// identical pr…	mitochondrion /// mitochondrion /// mitochondrial matrix /// mitochondrial matrix /// mitochondrial matrix							oxoglutarate dehydrogenase (succinyl-transferring) activity /// oxoglutarate dehydrogenase (succinyl-transferring) activity /// protein binding /// oxidoreductase activity /// oxidoreductase activity, acting on the aldehyde or oxo group of donors, disulfide as acceptor /// thiamin pyrophosphate binding	mitochondrion /// mitochondrial membrane
1641199_a_at	CG1544	6	---	generation of precursor metabolites and energy /// glycolysis /// metabolic process /// oxidation reduction	oxoglutarate dehydrogenase (succinyl-transferring) activity /// oxoglutarate dehydrogenase (succinyl-transferring) activity /// protein binding /// oxidoreductase activity /// oxidoreductase activity, acting on the aldehyde or oxo group of donors, disulfide as acceptor /// thiamin pyrophosphate binding	mitochondrion /// mitochondrial membrane							dihydrolipoyl dehydrogenase activity /// dihydrolipoyl dehydrogenase activity /// oxidoreductase activity /// FAD or FADH2 binding	cytoplasm /// lipid particle /// mitochondrial alpha-ketoglutarate dehydrogenase complex /// glycine cleavage complex
1641291_at	CG7430 /// DsimCG7430	6	Pyruvate dehydrogenase E3 subunit ///	tricarboxylic acid cycle /// glycine catabolic process /// lipoamide metabolic process /// cell redox homeostasis /// oxidation reduction	dihydrolipoyl dehydrogenase activity /// dihydrolipoyl dehydrogenase activity /// oxidoreductase activity /// FAD or FADH2 binding	cytoplasm /// lipid particle /// mitochondrial alpha-ketoglutarate dehydrogenase complex /// glycine cleavage complex
These are the results from Flymine, but looking the genes above on Flybase, they weren't clustered as respiratory genes.
Gene > Secondary Identifier	Gene > Symbol	Gene > DB identifier	Gene > GO Annotation > Ontology Term . Identifier	Gene > GO Annotation > Ontology Term . Name	Gene > GO Annotation > Ontology Term > Parents > Identifier	Gene > GO Annotation > Ontology Term > Parents > Name
CG5320	Gdh	FBgn0001098	GO:0009060	aerobic respiration	GO:0006091	generation of precursor metabolites and energy
CG7936	mex1	FBgn0004228	GO:0022900	electron transport chain	GO:0006091	generation of precursor metabolites and energy
CG12296	klu	FBgn0013469	GO:0006099	tricarboxylic acid cycle	GO:0006091	generation of precursor metabolites and energy
CG11783	Hr96	FBgn0015240	GO:0070873	regulation of glycogen metabolic process	GO:0006091	generation of precursor metabolites and energy
CG14724	CoVa	FBgn0019624	GO:0006123	mitochondrial electron transport, cytochrome c to oxygen	GO:0006091	generation of precursor metabolites and energy
CG6170	HDAC6	FBgn0026428	GO:0006099	tricarboxylic acid cycle	GO:0006091	generation of precursor metabolites and energy
CG6170	HDAC6	FBgn0026428	GO:0022904	respiratory electron transport chain	GO:0006091	generation of precursor metabolites and energy
CG5548	CG5548	FBgn0030605	GO:0006120	mitochondrial electron transport, NADH to ubiquinone	GO:0006091	generation of precursor metabolites and energy
CG5599	CG5599	FBgn0030612	GO:0006099	tricarboxylic acid cycle	GO:0006091	generation of precursor metabolites and energy
CG12400	CG12400	FBgn0031505	GO:0006120	mitochondrial electron transport, NADH to ubiquinone	GO:0006091	generation of precursor metabolites and energy
CG12140	CG12140	FBgn0033465	GO:0006119	oxidative phosphorylation	GO:0006091	generation of precursor metabolites and energy
CG7712	CG7712	FBgn0033570	GO:0006120	mitochondrial electron transport, NADH to ubiquinone	GO:0006091	generation of precursor metabolites and energy
CG4769	CG4769	FBgn0035600	GO:0006119	oxidative phosphorylation	GO:0006091	generation of precursor metabolites and energy
CG4769	CG4769	FBgn0035600	GO:0006122	mitochondrial electron transport, ubiquinol to cytochrome c	GO:0006091	generation of precursor metabolites and energy
CG7430	CG7430	FBgn0036762	GO:0006099	tricarboxylic acid cycle	GO:0006091	generation of precursor metabolites and energy
CG6666	SdhC	FBgn0037873	GO:0006099	tricarboxylic acid cycle	GO:0006091	generation of precursor metabolites and energy
CG6666	SdhC	FBgn0037873	GO:0006121	mitochondrial electron transport, succinate to ubiquinone	GO:0006091	generation of precursor metabolites and energy
CG6904	CG6904	FBgn0038293	GO:0005978	glycogen biosynthetic process	GO:0006091	generation of precursor metabolites and energy
CG1544	CG1544	FBgn0039827	GO:0006099	tricarboxylic acid cycle	GO:0006091	generation of precursor metabolites and energy
CG9603	CG9603	FBgn0040529	GO:0006123	mitochondrial electron transport, cytochrome c to oxygen	GO:0006091	generation of precursor metabolites and energy
CG5320	Gdh	FBgn0001098	GO:0009060	aerobic respiration	GO:0045333	cellular respiration
CG12296	klu	FBgn0013469	GO:0006099	tricarboxylic acid cycle	GO:0045333	cellular respiration
CG14724	CoVa	FBgn0019624	GO:0006123	mitochondrial electron transport, cytochrome c to oxygen	GO:0045333	cellular respiration
CG6170	HDAC6	FBgn0026428	GO:0006099	tricarboxylic acid cycle	GO:0045333	cellular respiration
CG6170	HDAC6	FBgn0026428	GO:0022904	respiratory electron transport chain	GO:0045333	cellular respiration
CG5548	CG5548	FBgn0030605	GO:0006120	mitochondrial electron transport, NADH to ubiquinone	GO:0045333	cellular respiration
CG5599	CG5599	FBgn0030612	GO:0006099	tricarboxylic acid cycle	GO:0045333	cellular respiration
CG12400	CG12400	FBgn0031505	GO:0006120	mitochondrial electron transport, NADH to ubiquinone	GO:0045333	cellular respiration
CG7712	CG7712	FBgn0033570	GO:0006120	mitochondrial electron transport, NADH to ubiquinone	GO:0045333	cellular respiration
CG4769	CG4769	FBgn0035600	GO:0006122	mitochondrial electron transport, ubiquinol to cytochrome c	GO:0045333	cellular respiration
CG7430	CG7430	FBgn0036762	GO:0006099	tricarboxylic acid cycle	GO:0045333	cellular respiration
CG6666	SdhC	FBgn0037873	GO:0006099	tricarboxylic acid cycle	GO:0045333	cellular respiration
CG6666	SdhC	FBgn0037873	GO:0006121	mitochondrial electron transport, succinate to ubiquinone	GO:0045333	cellular respiration
CG1544	CG1544	FBgn0039827	GO:0006099	tricarboxylic acid cycle	GO:0045333	cellular respiration
CG9603	CG9603	FBgn0040529	GO:0006123	mitochondrial electron transport, cytochrome c to oxygen	GO:0045333	cellular respiration
CG5320	Gdh	FBgn0001098	GO:0009060	aerobic respiration	GO:0015980	energy derivation by oxidation of organic compounds
CG12296	klu	FBgn0013469	GO:0006099	tricarboxylic acid cycle	GO:0015980	energy derivation by oxidation of organic compounds
CG11783	Hr96	FBgn0015240	GO:0070873	regulation of glycogen metabolic process	GO:0015980	energy derivation by oxidation of organic compounds
CG14724	CoVa	FBgn0019624	GO:0006123	mitochondrial electron transport, cytochrome c to oxygen	GO:0015980	energy derivation by oxidation of organic compounds
CG6170	HDAC6	FBgn0026428	GO:0006099	tricarboxylic acid cycle	GO:0015980	energy derivation by oxidation of organic compounds
CG6170	HDAC6	FBgn0026428	GO:0022904	respiratory electron transport chain	GO:0015980	energy derivation by oxidation of organic compounds
CG5548	CG5548	FBgn0030605	GO:0006120	mitochondrial electron transport, NADH to ubiquinone	GO:0015980	energy derivation by oxidation of organic compounds
CG5599	CG5599	FBgn0030612	GO:0006099	tricarboxylic acid cycle	GO:0015980	energy derivation by oxidation of organic compounds
CG12400	CG12400	FBgn0031505	GO:0006120	mitochondrial electron transport, NADH to ubiquinone	GO:0015980	energy derivation by oxidation of organic compounds
CG7712	CG7712	FBgn0033570	GO:0006120	mitochondrial electron transport, NADH to ubiquinone	GO:0015980	energy derivation by oxidation of organic compounds
CG4769	CG4769	FBgn0035600	GO:0006122	mitochondrial electron transport, ubiquinol to cytochrome c	GO:0015980	energy derivation by oxidation of organic compounds
CG7430	CG7430	FBgn0036762	GO:0006099	tricarboxylic acid cycle	GO:0015980	energy derivation by oxidation of organic compounds
CG6666	SdhC	FBgn0037873	GO:0006099	tricarboxylic acid cycle	GO:0015980	energy derivation by oxidation of organic compounds
CG6666	SdhC	FBgn0037873	GO:0006121	mitochondrial electron transport, succinate to ubiquinone	GO:0015980	energy derivation by oxidation of organic compounds
CG6904	CG6904	FBgn0038293	GO:0005978	glycogen biosynthetic process	GO:0015980	energy derivation by oxidation of organic compounds
CG1544	CG1544	FBgn0039827	GO:0006099	tricarboxylic acid cycle	GO:0015980	energy derivation by oxidation of organic compounds
CG9603	CG9603	FBgn0040529	GO:0006123	mitochondrial electron transport, cytochrome c to oxygen	GO:0015980	energy derivation by oxidation of organic compounds
CG5320	Gdh	FBgn0001098	GO:0009060	aerobic respiration	GO:0009060	aerobic respiration
CG12296	klu	FBgn0013469	GO:0006099	tricarboxylic acid cycle	GO:0009060	aerobic respiration
CG6170	HDAC6	FBgn0026428	GO:0006099	tricarboxylic acid cycle	GO:0009060	aerobic respiration
CG5599	CG5599	FBgn0030612	GO:0006099	tricarboxylic acid cycle	GO:0009060	aerobic respiration
CG7430	CG7430	FBgn0036762	GO:0006099	tricarboxylic acid cycle	GO:0009060	aerobic respiration
CG6666	SdhC	FBgn0037873	GO:0006099	tricarboxylic acid cycle	GO:0009060	aerobic respiration
CG1544	CG1544	FBgn0039827	GO:0006099	tricarboxylic acid cycle	GO:0009060	aerobic respiration
CG7936	mex1	FBgn0004228	GO:0022900	electron transport chain	GO:0022900	electron transport chain
CG14724	CoVa	FBgn0019624	GO:0006123	mitochondrial electron transport, cytochrome c to oxygen	GO:0022900	electron transport chain
CG6170	HDAC6	FBgn0026428	GO:0022904	respiratory electron transport chain	GO:0022900	electron transport chain
CG5548	CG5548	FBgn0030605	GO:0006120	mitochondrial electron transport, NADH to ubiquinone	GO:0022900	electron transport chain
CG12400	CG12400	FBgn0031505	GO:0006120	mitochondrial electron transport, NADH to ubiquinone	GO:0022900	electron transport chain
CG7712	CG7712	FBgn0033570	GO:0006120	mitochondrial electron transport, NADH to ubiquinone	GO:0022900	electron transport chain
CG4769	CG4769	FBgn0035600	GO:0006122	mitochondrial electron transport, ubiquinol to cytochrome c	GO:0022900	electron transport chain
CG6666	SdhC	FBgn0037873	GO:0006121	mitochondrial electron transport, succinate to ubiquinone	GO:0022900	electron transport chain
CG9603	CG9603	FBgn0040529	GO:0006123	mitochondrial electron transport, cytochrome c to oxygen	GO:0022900	electron transport chain
CG14724	CoVa	FBgn0019624	GO:0006123	mitochondrial electron transport, cytochrome c to oxygen	GO:0022904	respiratory electron transport chain
CG6170	HDAC6	FBgn0026428	GO:0022904	respiratory electron transport chain	GO:0022904	respiratory electron transport chain
CG5548	CG5548	FBgn0030605	GO:0006120	mitochondrial electron transport, NADH to ubiquinone	GO:0022904	respiratory electron transport chain
CG12400	CG12400	FBgn0031505	GO:0006120	mitochondrial electron transport, NADH to ubiquinone	GO:0022904	respiratory electron transport chain
CG7712	CG7712	FBgn0033570	GO:0006120	mitochondrial electron transport, NADH to ubiquinone	GO:0022904	respiratory electron transport chain
CG4769	CG4769	FBgn0035600	GO:0006122	mitochondrial electron transport, ubiquinol to cytochrome c	GO:0022904	respiratory electron transport chain
CG6666	SdhC	FBgn0037873	GO:0006121	mitochondrial electron transport, succinate to ubiquinone	GO:0022904	respiratory electron transport chain
CG9603	CG9603	FBgn0040529	GO:0006123	mitochondrial electron transport, cytochrome c to oxygen	GO:0022904	respiratory electron transport chain
CG14724	CoVa	FBgn0019624	GO:0006123	mitochondrial electron transport, cytochrome c to oxygen	GO:0042775	mitochondrial ATP synthesis coupled electron transport
CG5548	CG5548	FBgn0030605	GO:0006120	mitochondrial electron transport, NADH to ubiquinone	GO:0042775	mitochondrial ATP synthesis coupled electron transport
CG12400	CG12400	FBgn0031505	GO:0006120	mitochondrial electron transport, NADH to ubiquinone	GO:0042775	mitochondrial ATP synthesis coupled electron transport
CG7712	CG7712	FBgn0033570	GO:0006120	mitochondrial electron transport, NADH to ubiquinone	GO:0042775	mitochondrial ATP synthesis coupled electron transport
CG4769	CG4769	FBgn0035600	GO:0006122	mitochondrial electron transport, ubiquinol to cytochrome c	GO:0042775	mitochondrial ATP synthesis coupled electron transport
CG6666	SdhC	FBgn0037873	GO:0006121	mitochondrial electron transport, succinate to ubiquinone	GO:0042775	mitochondrial ATP synthesis coupled electron transport
CG9603	CG9603	FBgn0040529	GO:0006123	mitochondrial electron transport, cytochrome c to oxygen	GO:0042775	mitochondrial ATP synthesis coupled electron transport

## Sheet: TOR pathway
KEGG pathway	04150 TOR signaling pathway
GeneSymbol	KEGG .GeneID	fly mine GeneID	psetid	clusterid	HC02	HC04	HC06	HC08	HC12	HC18	HC24	HC32	HC40	HC48	HC56	HC72	LC02	LC04	LC06	LC08	LC12	LC18	LC24	LC32	LC40	LC48	LC56	LC72	SW02	SW04	SW06	SW08	SW12	SW18	SW24	SW32	SW40	SW48	SW56	SW72	LCvsHC.pvalue	LCvsHC.qvalue	LCvsHC.logfc	SWvsHC.pvalue	SWvsHC.qvalue	SWvsHC.logfc	SWvsLC.pvalue	SWvsLC.qvalue	SWvsLC.logfc
4EHP	CG33100	CG33100	1625051_at	5	8.98714	8.32034	8.24903	8.42717	8.90125	8.31016	8.89524	8.74018	8.91311	8.9134	9.17322	8.81518	9.11428	8.55745	8.64186	7.98512	9.2541	8.49541	8.75924	8.53017	8.61773	8.82753	8.90104	8.2136	8.86755	8.7668	9.43831	9.07292	8.70905	8.70979	8.53474	8.87742	9.05419	9.05381	8.70529	8.69849	0.514006	0.459152	-0.0623258	0.276973	0.37465	0.153578	0.137057	0.304494	0.215904
Akt1	CG4006	CG4006	1639064_s_at	5	10.1989	10.5366	10.3107	11.1051	11.0041	11.2531	10.7452	10.9239	10.3174	10.5951	10.6874	11.0461	11.0944	10.0511	11.005	10.4934	10.8191	10.9588	10.9081	10.8748	10.7346	10.7673	10.8767	10.9414	11.0462	11.1498	10.8455	10.4768	11.1281	10.7583	10.9289	10.7657	11.0245	10.8353	10.3063	10.545	0.618501	0.49491	0.066756	0.55688	0.475018	0.0905684	0.848157	0.563723	0.0238124
CG8866	CG8866	CG8866	1640539_a_at	5	7.63736	7.13796	7.11757	7.24792	7.3037	7.13333	7.23043	7.22834	7.50183	7.50573	7.5301	7.39822	7.4499	7.3913	7.19697	7.00071	7.46859	7.11289	7.19285	6.94345	7.30925	7.29928	7.20163	7.43424	7.19689	7.04697	7.66169	7.84671	7.09767	7.61423	7.34171	7.24313	7.33774	7.47597	7.77435	7.20018	0.163107	0.322419	-0.0809526	0.467017	0.444284	0.0720629	0.210655	0.346458	0.153016
CG8866	CG8866	CG8866	1625728_at	5	7.84603	7.85815	7.76778	7.95565	7.78219	7.98643	8.03577	7.92334	7.83402	8.07934	7.86764	7.7614	7.78798	7.66202	7.78406	7.76052	7.89181	7.98296	7.99105	7.93051	7.78278	7.97128	7.85888	8.28257	7.94031	7.94086	7.94541	7.83758	7.9757	7.88932	8.04595	7.91689	8.08116	7.74159	7.75374	7.74599	NA	NA	NA	NA	NA	NA	NA	NA	NA
eIF-4B	CG10837	CG10837	1640194_a_at	5	11.2013	11.151	11.1154	11.4078	11.4147	11.3379	11.2952	11.4366	11.2683	11.4054	11.3807	11.4228	11.4691	11.1808	11.5044	11.2477	11.3992	11.2669	11.1561	11.2876	11.324	11.404	11.3517	11.2572	11.3446	11.4274	11.3735	11.4336	11.4043	11.3544	11.2188	11.1589	11.2995	11.4221	11.0576	11.0103	0.985128	0.59929	0.000950178	0.665935	0.509354	-0.0276849	0.556834	0.475018	-0.0286351
eIF-4B	CG10837	CG10837	1629261_at	5	4.565	4.51154	4.43432	4.44305	4.24991	4.54343	4.44656	4.55893	4.53346	4.67389	4.59085	4.57013	4.3615	4.66706	4.69495	4.90204	4.44445	4.54283	4.70032	4.45793	4.67103	4.58658	4.44638	4.75369	4.52039	4.58765	4.51818	4.34361	4.67513	4.61012	4.54668	4.92151	4.75953	4.64751	4.71556	4.32603	NA	NA	NA	NA	NA	NA	NA	NA	NA
eIF-4B	CG10837	CG10837	1636358_a_at	5	11.11	10.997	11.0926	10.7963	10.7524	10.7561	10.6935	11.0181	10.8381	10.8137	10.7831	10.8762	10.8203	10.9723	11.0157	10.9233	10.6594	10.8949	10.1363	10.7513	10.9301	10.845	10.8466	10.4891	10.7849	10.9224	10.7782	10.7578	10.8325	11.0449	10.7544	10.7915	10.6985	10.7351	10.9185	10.6226	0.137149	0.304494	-0.103569	0.206595	0.344435	-0.0738185	0.668027	0.51019	0.0297502
eIF-4B	CG10837	CG10837	1640653_at	5	10.0717	10.2891	10.2967	10.7212	10.6474	10.7743	10.6989	10.6312	10.3646	10.7353	10.6433	10.7804	10.6709	10.133	10.8315	10.4633	10.5551	10.7426	10.6278	10.6841	10.532	10.7659	10.7212	10.6967	10.6002	10.7706	10.6746	10.4145	10.6089	10.5856	10.3945	10.2019	10.5973	10.6496	10.1776	10.3723	0.411558	0.4249	0.0641658	0.642013	0.502367	-0.0505504	0.2172	0.349912	-0.114716
eIF-4E	CG4035	CG4035	1629970_s_at	5	12.4447	12.1706	12.2195	12.0516	12.2749	12.043	12.3835	12.3027	12.5275	12.4253	12.5293	12.3921	12.3823	12.3134	12.121	12.0143	12.4654	12.0377	12.1443	12.0091	12.3371	12.4122	12.2848	12.1654	12.2667	12.1105	12.5101	12.5906	12.195	12.3255	12.2169	12.3299	12.267	12.4167	12.3287	12.2989	0.0706846	0.233415	-0.0898197	0.914595	0.58204	0.00764799	0.211622	0.347166	0.0974677
eIF4E-3	CG8023	CG8023	1641366_at	5	5.22215	5.42233	5.74751	5.11467	5.57625	5.60133	5.50401	5.38486	5.43009	4.98832	4.94976	5.31041	5.42252	5.00901	5.70758	5.5868	5.43885	5.38165	5.4373	5.28416	5.52507	5.11619	5.68922	5.28774	4.87562	5.72474	4.79366	4.985	5.34011	5.53285	4.71451	5.29997	5.71557	5.30897	5.30695	4.83295	0.566497	0.47785	0.0528653	0.25346	0.365915	-0.151734	0.164271	0.322815	-0.2046
eIF4E-4	CG10124	CG10124	1634082_at	5	4.28169	4.4567	4.13862	4.27685	4.35148	4.55193	4.40918	4.34584	4.55379	4.05909	4.38965	4.48241	4.18565	4.23375	4.38045	4.5312	4.20087	4.32104	4.35429	4.00295	4.36527	4.44686	4.36792	4.24443	4.39485	4.01934	4.04204	4.17114	3.94891	4.24469	4.36098	4.43408	4.56998	4.54548	4.43915	4.86844	NA	NA	NA	NA	NA	NA	NA	NA	NA
eIF4E-6	CG1442	CG1442	1633137_at	5	5.93875	6.64058	6.39867	6.36824	6.04659	6.22866	5.85415	6.04349	5.90754	5.95087	6.03544	5.86392	6.11038	6.20676	6.3771	6.70801	5.72608	6.36139	6.4931	6.52146	5.89248	5.9955	5.94661	6.37588	6.00677	6.39068	5.97064	5.47157	6.26842	6.40688	6.33542	6.07162	5.80524	5.8737	5.97995	6.05443	0.233171	0.357608	0.119819	0.612569	0.492812	-0.0534666	0.189708	0.335969	-0.173286
gig	CG6975	CG6975	1632822_at	5	8.74015	8.65349	8.56274	8.74842	8.76421	8.82705	8.84088	8.82369	8.70986	8.86988	8.9521	8.81805	8.63079	8.69791	8.74739	8.64318	8.89749	8.7206	8.78591	8.68221	8.72983	8.85345	8.85904	9.09647	8.72583	8.8668	8.82089	8.76493	8.67436	8.76815	8.74269	8.81276	8.85331	8.75776	8.68459	8.75402	NA	NA	NA	NA	NA	NA	NA	NA	NA
lkb1	CG9374	CG9374	1635781_s_at	5	6.91015	6.31843	6.4831	6.62381	6.6734	6.39743	6.87249	6.50828	6.74779	6.7981	6.98163	6.57104	6.80448	6.72439	6.66734	6.5549	7.077	6.57006	6.71164	6.63514	6.59692	6.83632	6.62299	6.85617	6.60919	6.62069	6.86031	7.1866	6.69862	6.8862	6.77966	6.75172	6.86081	6.85298	6.94986	6.53447	NA	NA	NA	NA	NA	NA	NA	NA	NA
Mo25	CG4083	CG4083	1628281_at	5	9.92901	10.3047	10.3522	10.3697	10.1396	10.2834	10.0797	10.3272	10.0671	9.99673	9.97083	10.2387	10.1151	10.1361	10.3116	10.1381	9.83099	10.1129	10.0209	10.1674	10.1156	10.0292	10.0613	10.1983	10.1465	10.2861	10.0207	9.83235	10.2184	10.1182	10.0763	9.96381	10.1404	10.1212	9.89088	9.91219	0.128306	0.297579	-0.06845	0.127397	0.297222	-0.110978	0.501593	0.454913	-0.0425284
Pi3K21B	CG2699	CG2699	1622909_at	5	10.2055	9.9635	9.90271	10.339	10.2059	10.1172	10.4608	10.5131	10.304	10.4535	10.59	10.5865	10.2913	9.98017	10.2097	9.82166	10.4652	10.1024	10.2245	10.0569	10.0777	10.2804	10.3547	10.3815	10.3149	10.0698	10.5097	10.4427	10.3192	10.1137	10.1268	10.3501	10.3331	10.3763	10.3692	10.1214	0.142934	0.308861	-0.116294	0.84092	0.561917	-0.0162189	0.173218	0.327132	0.100076
Pi3K92E	CG4141	CG4141	1631594_s_at	5	9.94189	9.66583	9.61029	9.71118	9.55578	9.65639	9.58021	9.78046	9.74943	9.52701	9.72773	9.67474	9.73212	9.80678	9.36117	9.41386	9.65885	9.37453	9.27462	9.44253	9.55931	9.54899	9.50423	9.57428	9.64965	9.46629	9.66231	9.89019	9.53472	9.65323	9.63964	9.62653	9.62199	9.58563	9.78576	9.3129	0.00611651	0.0607963	-0.160806	0.2114	0.347078	-0.0626766	0.216051	0.349208	0.0981299
raptor	CG4320	CG4320	1631177_at	5	6.06491	6.04905	6.04797	6.07052	6.12565	6.16025	6.10833	6.04628	6.21691	5.86966	6.05174	6.07275	6.22438	6.0083	5.88967	6.13914	5.72629	5.96998	5.73435	5.93599	6.4385	6.07265	6.00624	5.91832	5.89749	5.83118	5.9518	6.22874	5.90063	6.0196	6.03669	5.84964	6.04265	5.99126	6.24235	5.98782	NA	NA	NA	NA	NA	NA	NA	NA	NA
Rheb	CG1081	CG1081	1630949_s_at	5	11.3305	11.5258	11.296	11.4035	11.3019	11.5099	11.1795	11.1575	11.2501	11.3011	11.1153	11.2728	11.4092	11.4748	11.3508	11.3672	11.2793	11.6261	11.3827	11.3608	11.4099	11.3024	11.2435	11.224	11.3922	11.4413	11.3564	11.3737	11.4309	11.4582	11.3426	11.3046	11.3279	11.287	11.229	11.308	0.0382288	0.173532	0.0655918	0.0536826	0.205746	0.0506812	0.527705	0.464524	-0.0149106
rictor	CG8002	CG8002	1641023_at	5	8.89915	8.61526	8.33978	8.80053	8.69617	8.68214	8.70434	8.82258	8.70132	9.0026	9.01666	8.72561	8.9332	8.37968	8.76612	8.40207	9.01769	8.55501	8.67704	8.46452	8.6295	8.7792	8.7232	8.7034	8.70989	8.61304	8.87073	9.12255	8.91546	8.78843	8.73045	8.65676	8.90568	8.94731	8.51096	8.47028	0.290693	0.379998	-0.081293	0.813536	0.554655	0.0196152	0.227007	0.354618	0.100908
rl	CG12559	CG12559	1629549_s_at	5	10.6765	10.1192	10.0861	10.487	10.3005	10.0849	10.3218	10.7067	10.696	10.528	10.4416	10.4015	10.5634	10.5309	10.2436	10.1694	10.4347	10.0814	9.65158	10.111	10.466	10.411	10.2051	10.0535	10.3177	9.95393	10.4937	11.0673	10.4856	10.4912	10.4414	10.3299	10.4056	10.4267	10.653	10.1364	0.101018	0.272029	-0.160681	0.764975	0.539935	0.0293864	0.139765	0.307114	0.190068
S6k	CG10539	CG10539	1624244_at	5	10.4156	10.7573	10.7028	11.1443	11.0149	11.0277	11.0629	10.9	10.6377	10.9263	10.8802	11.0988	10.9759	10.8002	11.2171	10.822	10.8541	10.8874	11.0194	11.0244	10.8639	10.9885	11.0331	11.0356	10.914	11.1704	10.9838	10.5321	11.1382	10.748	10.9131	10.955	10.9176	11.0227	10.6781	10.7934	0.315832	0.389729	0.079415	0.866396	0.568474	0.0164905	0.34499	0.400191	-0.0629244
S6kII	CG17596	CG17596	1640019_at	5	8.34756	8.32258	8.16095	8.36275	8.26915	8.32191	8.22325	8.18941	8.1759	8.4374	8.37751	8.38667	8.44814	8.18485	8.46188	8.20109	8.40821	8.21884	8.36236	8.34925	8.20936	8.22999	8.16392	8.13842	8.18106	8.29226	8.54472	8.52748	8.34801	8.2597	8.31875	8.37365	8.35081	8.48061	8.29273	8.32732	0.75991	0.538875	-0.0165589	0.199053	0.340794	0.0601716	0.116938	0.286372	0.0767305
sima	CG7951	CG45051	1641206_at	5	8.33217	8.52149	8.1469	8.65473	8.39768	8.40819	7.98542	8.43314	8.17212	8.06581	8.28816	8.3284	8.60319	8.40384	8.65357	8.46472	8.32536	8.43037	8.30278	8.4441	8.5244	8.32351	8.44901	8.13108	8.4664	8.73554	8.44753	8.30838	8.58135	8.35077	8.41285	8.31813	8.59316	8.70887	8.27487	8.43376	0.129557	0.29858	0.110143	0.0684797	0.229893	0.158117	0.470177	0.445819	0.0479735
SNF1A	CG3051	CG3051	1629357_s_at	5	10.7362	11.0115	10.8408	10.8779	10.574	10.8501	10.6129	10.563	10.6351	10.7039	10.6041	10.6831	10.8657	11.0037	10.777	10.8737	10.4662	10.7746	10.6834	10.7904	10.6865	10.6351	10.5957	10.7393	10.7949	10.856	10.5929	10.5921	10.6851	10.6604	10.6941	10.7501	10.6324	10.6358	10.7493	10.5285	0.563787	0.477128	0.016562	0.372265	0.410317	-0.0434205	0.178939	0.33087	-0.0599824
Tor	CG5092	CG5092	1641510_at	5	9.07732	8.92825	8.93693	8.86002	8.96104	8.82944	8.92038	8.95062	8.90408	8.94032	9.18339	8.94525	8.97162	9.0732	8.86188	8.85467	9.13491	8.76721	8.82676	8.83356	8.9502	8.90585	8.86237	9.06611	8.95018	8.9544	9.01006	9.09475	8.70625	8.88645	8.8861	8.89145	8.84616	9.02377	9.05246	8.92169	NA	NA	NA	NA	NA	NA	NA	NA	NA
Tsc1	CG6147	CG6147	1640930_at	5	9.02625	8.7819	8.63922	8.71144	9.02217	8.73817	9.17494	9.03886	9.10687	9.31628	9.29299	8.98787	9.02461	8.73943	8.85132	8.43555	9.19613	8.84656	9.05447	8.79377	8.82473	9.10846	9.08368	9.19267	8.9179	8.89042	9.1748	9.2672	8.92425	8.99508	8.91789	9.01013	9.17772	9.06459	8.87139	8.99151	0.326691	0.393661	-0.0571313	0.732271	0.529879	0.0304939	0.360205	0.406241	0.0876252
TOR pathway genes not on the microarray
Pdk1	CG1210	CG1210	NA	NA	NA	NA	NA	NA	NA	NA	NA	NA	NA	NA	NA	NA	NA	NA	NA	NA	NA	NA	NA	NA	NA	NA	NA	NA	NA	NA	NA	NA	NA	NA	NA	NA	NA	NA	NA	NA	NA	NA	NA	NA	NA	NA	NA	NA	NA
Lst8	CG3004	CG3004	NA	NA	NA	NA	NA	NA	NA	NA	NA	NA	NA	NA	NA	NA	NA	NA	NA	NA	NA	NA	NA	NA	NA	NA	NA	NA	NA	NA	NA	NA	NA	NA	NA	NA	NA	NA	NA	NA	NA	NA	NA	NA	NA	NA	NA	NA	NA
Atg1	CG10967	CG10967	NA	NA	NA	NA	NA	NA	NA	NA	NA	NA	NA	NA	NA	NA	NA	NA	NA	NA	NA	NA	NA	NA	NA	NA	NA	NA	NA	NA	NA	NA	NA	NA	NA	NA	NA	NA	NA	NA	NA	NA	NA	NA	NA	NA	NA	NA	NA
